# Supplementary material
Source: PubMed Central journal article supplement (PMC5608269)
Supplement: NIHMS896760-supplement-Supporting_Information.pdf [file NIHMS896760-supplement-Supporting_Information.pdf]

# Ir-Catalyzed ortho-Borylation of Phenols Directed by Substrate-Ligand Electrostatic Interactions: A Combined Experimental/*in Silico* Strategy for Optimizing Weak Interactions

Buddhadeb Chattopadhyay,<sup>†,§</sup> Jonathan E. Dannatt,<sup>†</sup> Ivonne L. Andujar-De Sanctis,<sup>‡</sup> Kristin A. Gore,<sup>†</sup> Robert E. Maleczka, Jr.<sup>†,\*</sup> Daniel A. Singleton,<sup>‡,\*</sup> and Milton R. Smith, III<sup>†,\*</sup>

<sup>†</sup>Department of Chemistry, Michigan State University, 578 South Shaw Lane, East Lansing, Michigan 48824-1322 USA

<sup>‡</sup>Department of Chemistry, Texas A&M University, PO Box 30012, College Station, Texas 77842

<sup>§</sup>Center of Bio-Medical Research, Division of Molecular Synthesis & Drug Discovery, Sanjay Gandhi Post Graduate Institute of Medical Sciences, Raebareli Road, Lucknow, Uttar Pradesh 226014, India

## Supporting Information

|                                                                                             |    |
|---------------------------------------------------------------------------------------------|----|
| Experimental Section .....                                                                  | 5  |
| General Information .....                                                                   | 5  |
| Borylation of Anisole: .....                                                                | 5  |
| Borylation of 4-Chloroanisole with B <sub>2</sub> pin <sub>2</sub> (2a):.....               | 6  |
| Borylation of 4-Fluoroanisole with B <sub>2</sub> pin <sub>2</sub> (2c): .....              | 6  |
| Borylation of 4-Cyanophenol with limiting B <sub>2</sub> pin <sub>2</sub> (1b) .....        | 7  |
| Borylation of 4-Fluorophenol with limiting B <sub>2</sub> Pin <sub>2</sub> (1c).....        | 8  |
| General Procedure for the Synthesis of Pinacolborane (Bpin) Protected Phenols:.....         | 8  |
| Preparation of 2-(4-chlorophenoxy)-4,4,5,5-tetramethyl-1,3,2-dioxaborolane:.....            | 8  |
| Preparation of 2-(4-fluorophenoxy)-4,4,5,5-tetramethyl-1,3,2-dioxaborolane: .....           | 9  |
| Preparation of 2-(4-methoxyphenoxy)-4,4,5,5-tetramethyl-1,3,2-dioxaborolane: .....          | 9  |
| Preparation of 2-(4-bromophenoxy)-4,4,5,5-tetramethyl-1,3,2-dioxaborolane: .....            | 10 |
| Preparation 4,4,5,5-tetramethyl-2-(p-tolyloxy)-1,3,2-dioxaborolane:.....                    | 10 |
| Preparation of 2-(4-(tert-butyl)phenoxy)-4,4,5,5-tetramethyl-1,3,2-dioxaborolane: .....     | 10 |
| Preparation of 4,4,5,5-tetramethyl-2-(4-(trifluoromethyl)phenoxy)-1,3,2-dioxaborolane:..... | 11 |
| Preparation of ethyl 4-((4,4,5,5-tetramethyl-1,3,2-dioxaborolan-2-yl)oxy)benzoate: .....    | 11 |
| Preparation of 2-(4-bromo-2-chlorophenoxy)-4,4,5,5-tetramethyl-1,3,2-dioxaborolane: .....   | 12 |

|                                                                                                                 |    |
|-----------------------------------------------------------------------------------------------------------------|----|
| Preparation of 2-(2,4-dichlorophenoxy)-4,4,5,5-tetramethyl-1,3,2-dioxaborolane: .....                           | 12 |
| Preparation of 2-(3,4-dimethylphenoxy)-4,4,5,5-tetramethyl-1,3,2-dioxaborolane:.....                            | 12 |
| Preparation of 2-(4-chloro-3-methylphenoxy)-4,4,5,5-tetramethyl-1,3,2-dioxaborolane: .....                      | 13 |
| Preparation of 2-(2-methoxy-4-methylphenoxy)-4,4,5,5-tetramethyl-1,3,2-dioxaborolane: ....                      | 13 |
| Preparation of ethyl 3-((4,4,5,5-tetramethyl-1,3,2-dioxaborolan-2-yl)oxy)benzoate: .....                        | 14 |
| Preparation of 4,4,5,5-tetramethyl-2-(o-tolyloxy)-1,3,2-dioxaborolane: .....                                    | 14 |
| Preparation of 4,4,5,5-tetramethyl-2-phenoxy-1,3,2-dioxaborolane:.....                                          | 15 |
| Preparation of 2-(3-methoxyphenoxy)-4,4,5,5-tetramethyl-1,3,2-dioxaborolane: .....                              | 15 |
| Preparation of 2-(3-chlorophenoxy)-4,4,5,5-tetramethyl-1,3,2-dioxaborolane:.....                                | 15 |
| Preparation of 4,4,5,5-tetramethyl-2-(naphthalen-2-yloxy)-1,3,2-dioxaborolane:.....                             | 16 |
| Preparation of the Authentic Boronic Esters for Phenols:.....                                                   | 16 |
| 2-(2-Hydroxyphenyl)1,3,2-dioxaborolane from 2-hydroxyphenylboronic acid and ethylene glycol: .....              | 16 |
| 2-(3-Hydroxyphenyl)1,3,2-dioxaborolane from 3-hydroxyphenylboronic acid and ethylene glycol: .....              | 17 |
| 2-(4-Hydroxyphenyl)1,3,2-dioxaborolane from 4-hydroxyphenylboronic acid and ethylene glycol: .....              | 17 |
| 2-(2-Hydroxyphenyl)-4,4,5,5-tetramethyl-1,3,2-dioxaborolane from 2-hydroxyphenylboronic acid and pinacol: ..... | 18 |
| 2-(3-Hydroxyphenyl)-4,4,5,5-tetramethyl-1,3,2-dioxaborolane .....                                               | 18 |
| 2-(4-Hydroxyphenyl)-4,4,5,5-tetramethyl-1,3,2-dioxaborolane from 4-hydroxyphenylboronic acid and pinacol: ..... | 18 |
| Synthesis of 2,2'-bi(1,3,2-dioxaborolane) from Tetrahydroxydiboron: .....                                       | 19 |
| Borylation of 4-Chlorophenol with B <sub>2</sub> pin <sub>2</sub> (1a): .....                                   | 19 |
| Gram Scale Borylation of 4-Chlorophenol (1a): .....                                                             | 20 |
| Borylation of 2-Chloro-5-hydroxypyridine with B <sub>2</sub> pin <sub>2</sub> (1b):.....                        | 20 |
| Borylation of 4-Fluorophenol with B <sub>2</sub> pin <sub>2</sub> (1c):.....                                    | 21 |
| Borylation of 4-methoxyphenol with B <sub>2</sub> pin <sub>2</sub> (1d): .....                                  | 22 |
| Borylation of 4-bromophenol with B <sub>2</sub> pin <sub>2</sub> (1e):.....                                     | 22 |
| Borylation of 4-methylphenol with B <sub>2</sub> pin <sub>2</sub> (1f):.....                                    | 23 |
| Borylation of 4-tertbutylphenol with B <sub>2</sub> pin <sub>2</sub> (1g):.....                                 | 24 |

|                                                                                                                                      |    |
|--------------------------------------------------------------------------------------------------------------------------------------|----|
| Borylation of 4-trifluoromethylphenol with B <sub>2</sub> pin <sub>2</sub> (1h):                                                     | 24 |
| Borylation of 4-carboethoxyphenol with B <sub>2</sub> pin <sub>2</sub> (1i):                                                         | 25 |
| Borylation of 4-bromo-2-chlorophenol with B <sub>2</sub> pin <sub>2</sub> (1j):                                                      | 26 |
| Borylation of 2,4-dichlorophenol with B <sub>2</sub> pin <sub>2</sub> (1k):                                                          | 26 |
| Borylation of 3,4-dimethylphenol with B <sub>2</sub> pin <sub>2</sub> (1l):                                                          | 27 |
| Borylation of 4-chloro-3-methylphenol with B <sub>2</sub> pin <sub>2</sub> (1m):                                                     | 28 |
| Borylation of 2-methoxy-4-methylphenol with B <sub>2</sub> pin <sub>2</sub> (1n):                                                    | 28 |
| Borylation of 3-carboethoxyphenol with B <sub>2</sub> pin <sub>2</sub> (1o):                                                         | 29 |
| Borylation of ortho-cresol with B <sub>2</sub> pin <sub>2</sub> (1p):                                                                | 29 |
| Borylation of phenol with B <sub>2</sub> eg <sub>2</sub> (1q):                                                                       | 30 |
| Borylation of 4-Fluorophenol with B <sub>2</sub> eg <sub>2</sub> (1r):                                                               | 30 |
| Borylation of 3-carboethoxyphenol with B <sub>2</sub> eg <sub>2</sub> (1s)                                                           | 31 |
| Borylation of ortho-cresol with B <sub>2</sub> eg <sub>2</sub> (1t):                                                                 | 32 |
| Borylation of 3-methoxyphenol with B <sub>2</sub> eg <sub>2</sub> (1u):                                                              | 32 |
| Borylation of 3-chlorophenol with B <sub>2</sub> eg <sub>2</sub> (1v):                                                               | 33 |
| Borylation of 2-methoxyphenol with B <sub>2</sub> eg <sub>2</sub> (1w):                                                              | 34 |
| Borylation of 2-naphthol with B <sub>2</sub> eg <sub>2</sub> (1x):                                                                   | 34 |
| Evidence for 2-(4-fluorophenoxy)-1,3,2-dioxaborolanephens formation under the reaction conditions:                                   | 35 |
| Control for effects of toluene on borylation selectivity:                                                                            | 36 |
| Control for effects of toluene and triethylamine on borylation selectivity:                                                          | 36 |
| Example of effects of triethylamine on B <sub>2</sub> eg <sub>2</sub> reaction:                                                      | 37 |
| Synthesis of 2-(4-fluorophenoxy)-4,4,5,5-tetramethyl-1,3,2-dioxaborolane from 4-fluorophenol and the isolated trisboryl Ir catalyst: | 38 |
| Borylation of phenol with Ligand 4a:                                                                                                 | 39 |
| Borylation of phenol with Ligand 4b:                                                                                                 | 40 |
| Borylation of phenol with Ligand 4c:                                                                                                 | 40 |
| Borylation of phenol with Ligand 4d:                                                                                                 | 41 |
| 2-(4-fluorophenoxy)-1,3,2-dioxaborolane from 4-fluorophenol following Route B:                                                       | 42 |
| 2-(2-fluorophenoxy)-1,3,2-dioxaborolane from 2-fluorophenol Route A:                                                                 | 42 |
| 2-(2-fluorophenoxy)-1,3,2-dioxaborolane from 2-fluorophenol Route B:                                                                 | 44 |

|                                                                                                         |     |
|---------------------------------------------------------------------------------------------------------|-----|
| 2-(2-fluorophenoxy)-1,3,2-dioxaborolane from 2-fluorophenol Route C:.....                               | 45  |
| Computational Procedures and Results .....                                                              | 46  |
| General.....                                                                                            | 46  |
| Guide to Structures, Structure Titles and Their Organization .....                                      | 46  |
| Calculated Structures, Energies, and Selected NPA Charges .....                                         | 48  |
| Reactants: .....                                                                                        | 48  |
| 4-MeO-C <sub>6</sub> H <sub>4</sub> OBpin' M06/6-31+G** (3).....                                        | 48  |
| 4-MeO-C <sub>6</sub> H <sub>4</sub> OBpin' M06/6-31G* (3) .....                                         | 48  |
| 4-F-C <sub>6</sub> H <sub>4</sub> OBeg M06/6-31+G** .....                                               | 48  |
| 4-F-C <sub>6</sub> H <sub>4</sub> OBeg M06/6-31G* .....                                                 | 49  |
| 4-F-C <sub>6</sub> H <sub>4</sub> OBpin M06/6-31+G** .....                                              | 49  |
| 4-F-C <sub>6</sub> H <sub>4</sub> OBpin M06/6-31G* .....                                                | 50  |
| (bpy)Ir(Beg) <sub>3</sub> M06/BS1 .....                                                                 | 50  |
| (bpy)Ir(Beg) <sub>2</sub> (Bpin') M06/BSsmall .....                                                     | 51  |
| (bpy)Ir(Beg) <sub>2</sub> (Bpin') M06/BS1 .....                                                         | 52  |
| (bpy)Ir(Bpin) <sub>3</sub> M06/BSsmall .....                                                            | 52  |
| (bpy)Ir(Bpin) <sub>3</sub> M06/BS1 .....                                                                | 53  |
| (tbut-bpy)Ir(Beg) <sub>3</sub> M06/BSsmall .....                                                        | 54  |
| Transition Structures: .....                                                                            | 55  |
| TS3-OBpin' <sub>anti</sub> M06/BSsmall.....                                                             | 55  |
| TS3-OBpin' <sub>anti</sub> M06/BS1 .....                                                                | 57  |
| TS3-OMe <sub>anti</sub> M06/BSsmall .....                                                               | 57  |
| TS3-OMe <sub>anti</sub> M06/BS1 .....                                                                   | 59  |
| TS3-OBpin' <sub>syn</sub> M06/BSsmall .....                                                             | 60  |
| TS3-OBpin' <sub>syn</sub> M06/BS1 .....                                                                 | 61  |
| TS3-OMe Conformer B M06/BSsmall .....                                                                   | 62  |
| TS3-OMe <sub>syn</sub> M06/BS1 .....                                                                    | 63  |
| TS5-OBeg <sub>anti</sub> M06/BSsmall .....                                                              | 64  |
| TS5-OBeg <sub>anti</sub> M06/BS1 .....                                                                  | 65  |
| TS5-F M06/BSsmall .....                                                                                 | 66  |
| TS5-OBeg <sub>syn</sub> M06/BSsmall.....                                                                | 67  |
| TS5-OBeg <sub>syn</sub> Conformer B M06/BSsmall .....                                                   | 68  |
| TS for (bpy)IrBpin <sub>3</sub> + 4-FC <sub>6</sub> H <sub>4</sub> OBpin, meta to F, M06/BSsmall .....  | 69  |
| TS for (bpy)IrBpin <sub>3</sub> + 4-FC <sub>6</sub> H <sub>4</sub> OBpin, ortho to F, M06/BSsmall ..... | 70  |
| Spectral Copies .....                                                                                   | 73  |
| References.....                                                                                         | 178 |

## Experimental Section

### General Information

All commercially available chemicals were used as received unless otherwise indicated. Bis(pinacolato)diboron ( $B_2pin_2$ ) and tetrahydroxydiboron ( $B_2(OH)_4$ ) were generously supplied by BoroPharm, Inc., and pinacolborane (HBpin) was purchased from Anderson Chemical Company. Bis( $\eta^4$ -1,5-cyclooctadiene)-di- $\mu$ -methoxy-diiridium(I)  $[Ir(OMe)(cod)]_2$  was prepared per literature procedure.<sup>1</sup> Cyclohexane (CyH) and tetrahydrofuran (THF) were refluxed over sodium/benzophenone ketyl, distilled and degassed. Column chromatography was performed on Silia P-Flash silica gel. Thin layer chromatography was performed on 0.25 mm thick aluminum-backed silica gel plates and visualized with ultraviolet light ( $\lambda = 254$  nm) and iodine. Sublimations were conducted with a water-cooled cold finger.

$^1H$ ,  $^{13}C$ ,  $^{11}B$  and  $^{19}F$  NMR spectra were recorded on 500 MHz NMR spectrometers. The boron bearing carbon atom was not observed due to quadrupolar relaxation. All coupling constants are apparent  $J$  values measured at the indicated field strengths in Hertz (s = singlet, d = doublet, t = triplet, q = quartet, dd = doublet of doublets, ddd = doublet of doublet of doublets, bs = broad singlet). High-resolution mass spectra (HRMS) were obtained at the Michigan State University Mass Spectrometry Service Center using electrospray ionization (ESI+ or ESI-).<sup>2</sup> Melting points were measured in a capillary melting point apparatus and are uncorrected.

### Borylation of Anisole:

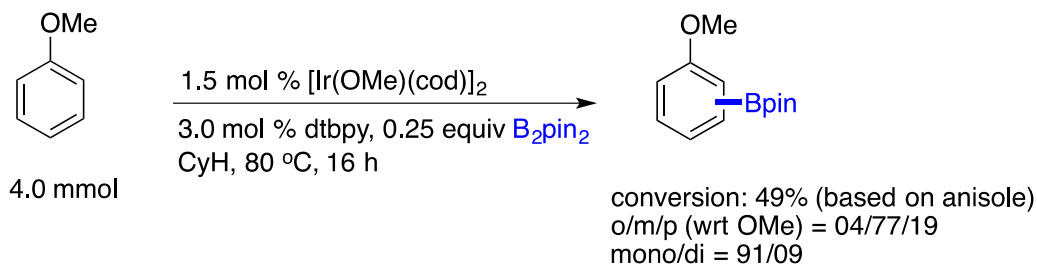

The reaction was conducted using a modified version of a previously reported<sup>3</sup> procedure. In a glovebox, a 5 mL conical vial was charged with anisole (435  $\mu$ L, 4.0 mmol),  $[Ir(OMe)(cod)]_2$  (10 mg, 1.5 mol %, 0.015 mmol), dtbpy (8 mg, 3 mol %, 0.03 mmol),  $B_2Pin_2$  (254 mg, 1.0 mmol, 0.25 equiv), and dry cyclohexane (3 mL). The vial was sealed and placed in a preheated aluminum block at 80°C for 16 h. The volatiles were then removed on the rotary evaporator, and the conversion and isomer ratios were determined by GC/FID. The results are shown in the scheme.

**Borylation of 4-Chloroanisole with B<sub>2</sub>pin<sub>2</sub> (2a):**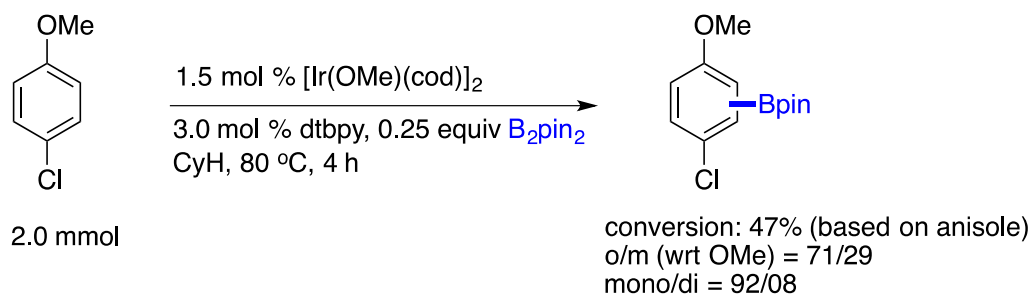

In a glovebox, a 5 mL conical vial was charged with [Ir(OMe)(cod)]<sub>2</sub> (10 mg, 1.5 mol %, 0.015 mmol), dtbpy (8 mg, 3.0 mol %, 0.03 mmol), and B<sub>2</sub>pin<sub>2</sub> (127 mg, 0.25 equiv, 0.5 mmol). Dry cyclohexane (3 mL, 0.33 M) was added under an inert atmosphere and stirred for 5 min at room temperature. To this mixture, 4-chloroanisole (285 mg, 2.0 mmol) was added. The vial was capped with a teflon pressure cap and placed into a pre-heated aluminum block at 80 °C and was stirred for 4 h. GC analysis showed that conversion of the starting material was 47% based on the consumption of the anisole and the borylation results<sup>4</sup> are as follows: mono/di = 92/08, ortho/meta (wrt OMe) = 71/29.

**Borylation of 4-Fluoroanisole with B<sub>2</sub>pin<sub>2</sub> (2c):**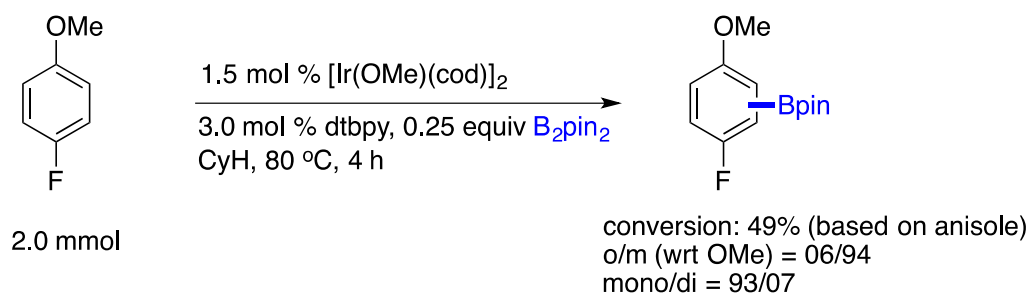

In a glovebox, a 5 mL conical vial was charged with [Ir(OMe)(cod)]<sub>2</sub> (10 mg, 1.5 mol %, 0.015 mmol), dtbpy (8 mg, 3.0 mol %, 0.03 mmol), and B<sub>2</sub>pin<sub>2</sub> (127 mg, 0.25 equiv). Dry cyclohexane (3 mL) was added under an inert atmosphere and stirred for 5 min at room temperature. To this mixture, 4-fluoroanisole (252 mg, 2.0 mmol) was added. The vial was capped with a teflon pressure cap and placed into a pre-heated aluminum block at 80 °C and was stirred for 4 h. GC analysis showed that conversion of the starting material was 49% based on the consumption of the anisole and the borylation results are as follows: mono/di = 93/07, ortho/meta (wrt OMe) = 06/94.

### Borylation of 4-Chlorophenol with limiting B<sub>2</sub>pin<sub>2</sub> (1a)

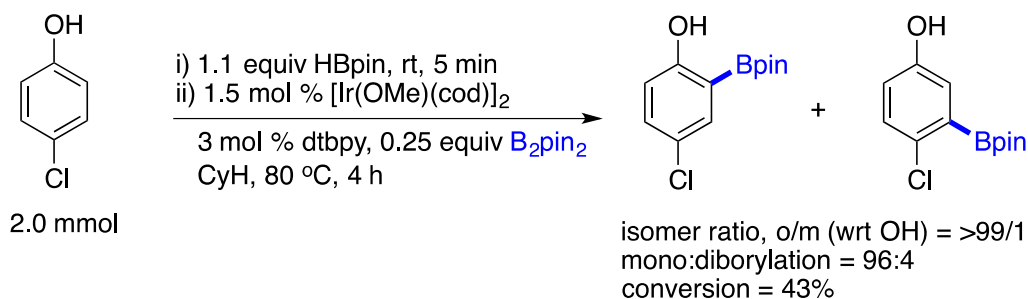

In a glovebox, a 5 mL conical vial was charged with 4-chlorophenol (257 mg, 2.0 mmol) and pinacolborane (319  $\mu$ L, 1.1 equiv) and stirred for 5 min at room temperature. To this mixture, [Ir(OMe)(cod)]<sub>2</sub> (10 mg, 1.5 mol %, 0.015 mmol), dtbpy (8 mg, 3.0 mol %, 0.03 mmol), and B<sub>2</sub>pin<sub>2</sub> (127 mg, 0.25 equiv) was charged. Dry cyclohexane (3 mL, 0.33 M) was added under an inert atmosphere. The vial was capped with a teflon pressure cap and placed into a pre-heated aluminum block at 80 °C. The reaction mixture was stirred for 4 h. The borylation results are shown in the scheme above and the results are based on GC and <sup>1</sup>H NMR data.

### Borylation of 4-Cyanophenol with limiting B<sub>2</sub>pin<sub>2</sub> (1b)

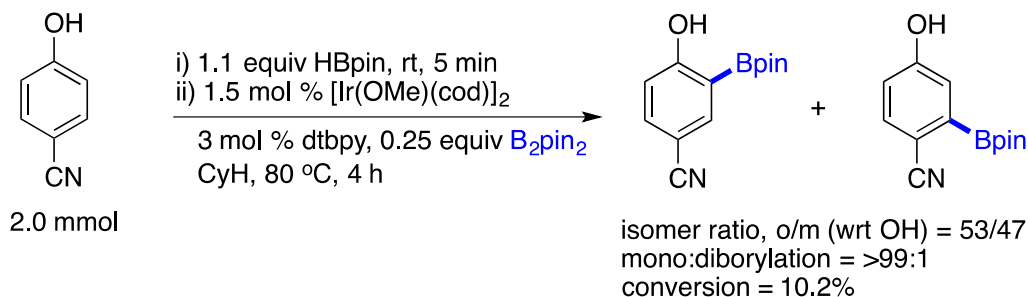

In a glovebox, a 5 mL conical vial was charged with 4-cyanophenol (238 mg, 2.0 mmol) and pinacolborane (319  $\mu$ L, 1.1 equiv) and stirred for 5 min at room temperature. To this mixture, [Ir(OMe)(cod)]<sub>2</sub> (10 mg, 1.5 mol %, 0.015 mmol), dtbpy (8 mg, 3.0 mol %, 0.03 mmol), and B<sub>2</sub>pin<sub>2</sub> (127 mg, 0.25 equiv) was charged. Dry cyclohexane (3 mL, 0.33 M) was added under an inert atmosphere. The vial was capped with a teflon pressure cap and placed into a pre-heated aluminum block at 80 °C. The reaction mixture was stirred for 4 h. The borylation results are shown in the scheme and the results are based on the crude <sup>1</sup>H NMR Data.

### Borylation of 4-Fluorophenol with limiting B<sub>2</sub>Pin<sub>2</sub> (1c)

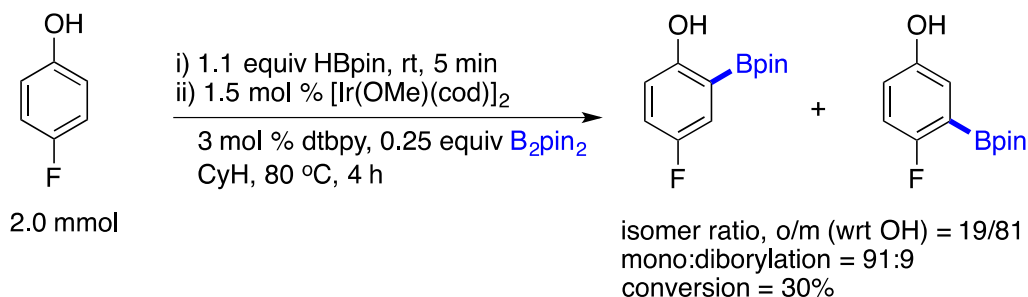

In a glovebox, a 5 mL conical vial was charged with 4-fluorophenol (224 mg, 2.0 mmol) and pinacolborane (319  $\mu$ L, 1.1 equiv) and stirred for 5 min at room temperature. To this mixture, [Ir(OMe)(cod)]<sub>2</sub> (10 mg, 1.5 mol %, 0.015 mmol), dtbpy (8 mg, 3.0 mol %, 0.03 mmol), and B<sub>2</sub>pin<sub>2</sub> (127 mg, 0.25 equiv) was charged. Dry cyclohexane (3 mL, 0.33 M) was added under an inert atmosphere. The vial was capped with a teflon pressure cap and placed into a pre-heated aluminum block at 80 °C. The reaction mixture was stirred for 4 h. The borylation results are shown in the scheme and the results are based on GC data.

### General Procedure for the Synthesis of Pinacolborane (Bpin) Protected Phenols:

In a glovebox, under a N<sub>2</sub> atmosphere phenols (0.5 mmol) and HBpin (0.55 mmol) were charged in a 2 mL vial, and stirred at room temperature for 1-30 min until the reaction was complete (quantitative conversion). The product was characterized by <sup>1</sup>H, <sup>13</sup>C, and <sup>11</sup>B NMR in air-free, screw cap NMR tubes.

### Preparation of 2-(4-chlorophenoxy)-4,4,5,5-tetramethyl-1,3,2-dioxaborolane:

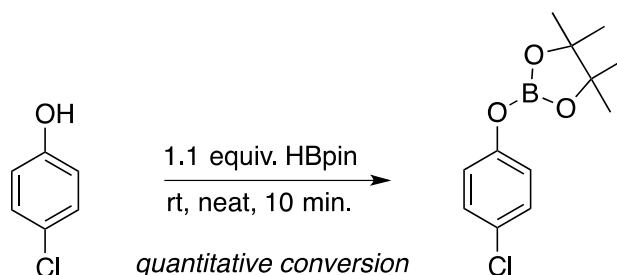

The Bpin protected 4-chlorophenol was prepared as described in the general procedure using 4-chlorophenol (0.5 mmol, 64 mg) and HBpin (80  $\mu$ L, 0.55 mmol).

<sup>1</sup>H NMR (500 MHz, CDCl<sub>3</sub>):  $\delta$ <sub>H</sub> 7.22-7.19 (m, 2H), 7.03 – 6.99 (m, 2H), 1.30 (s, 12H).

<sup>13</sup>C NMR (125 MHz, CDCl<sub>3</sub>):  $\delta$ <sub>C</sub> 152.0, 129.2, 128.1, 120.8, 83.7, 24.6.

<sup>11</sup>B NMR (176, MHz, CDCl<sub>3</sub>):  $\delta$ <sub>B</sub> 21.7 (s).



**Preparation of 2-(4-fluorophenoxy)-4,4,5,5-tetramethyl-1,3,2-dioxaborolane:**

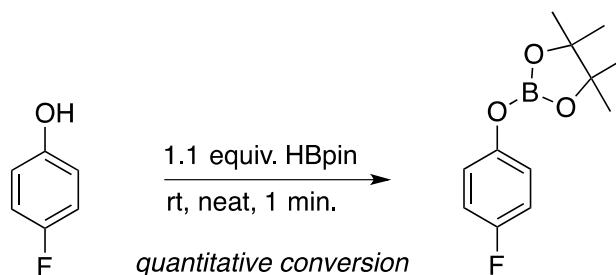

The Bpin protected 4-fluorophenol was prepared as described in the general procedure using 4-fluorophenol (56 mg, 0.5 mmol) and HBpin (80  $\mu$ L, 0.55 mmol).

$^1\text{H}$  NMR (500 MHz,  $\text{CDCl}_3$ ):  $\delta_{\text{H}}$  7.03-7.00 (m, 2H), 6.95 – 6.90 (m, 2H), 1.30 (s, 12H).

$^{13}\text{C}$  NMR (125 MHz,  $\text{CDCl}_3$ ):  $\delta_{\text{C}}$  158.6 (d,  $^1J_{\text{C-F}} = 241$  Hz), 149.2 (d,  $^4J_{\text{C-F}} = 2.8$  Hz), 120.6 (d,  $^3J_{\text{C-F}} = 8.6$  Hz), 115.7 (d,  $^2J_{\text{C-F}} = 23.4$  Hz), 83.6, 24.6.

$^{11}\text{B}$  NMR (176, MHz,  $\text{CDCl}_3$ ):  $\delta_{\text{B}}$  21.7 (s).

$^{19}\text{F}$  NMR (470 MHz,  $\text{CDCl}_3$ ):  $\delta_{\text{F}}$  -121.1 (td,  $J = 13.3, 8.3, 4.9$  Hz).

**Preparation of 2-(4-methoxyphenoxy)-4,4,5,5-tetramethyl-1,3,2-dioxaborolane:**

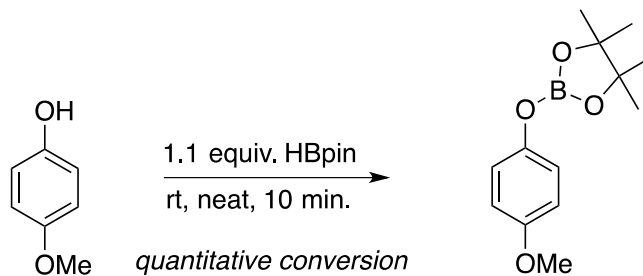

The Bpin protected 4-methoxyphenol was prepared as described in the general procedure using 4-methoxyphenol (54 mg, 0.5 mmol) and HBpin (80  $\mu$ L, 0.55 mmol).

$^1\text{H}$  NMR (500 MHz,  $\text{CDCl}_3$ ):  $\delta_{\text{H}}$  7.01-6.97(m, 2H), 6.80 – 6.76 (m, 2H), 3.74 (s, 3H), 1.29 (s, 12H).

$^{13}\text{C}$  NMR (125 MHz,  $\text{CDCl}_3$ ):  $\delta_{\text{C}}$  155.3, 147.3, 120.1, 114.3, 83.5, 55.6, 24.6.

$^{11}\text{B}$  NMR (176, MHz,  $\text{CDCl}_3$ ):  $\delta_{\text{B}}$  21.7 (s).

**Preparation of 2-(4-bromophenoxy)-4,4,5,5-tetramethyl-1,3,2-dioxaborolane:**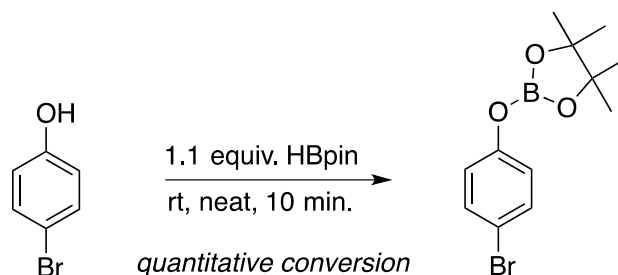

The Bpin protected 4-bromophenol was prepared as described in the general procedure using 4-bromophenol (87 mg, 0.5 mmol) and HBpin (80  $\mu$ L, 0.55 mmol).

$^1\text{H}$  NMR (500 MHz,  $\text{CDCl}_3$ ):  $\delta_{\text{H}}$  7.37 – 7.33 (m, 2H), 6.97 – 6.95 (m, 2H), 1.29 (s, 12H).

$^{13}\text{C}$  NMR (125 MHz,  $\text{CDCl}_3$ ):  $\delta_{\text{C}}$  152.6, 132.2, 121.4, 115.7, 83.8, 24.6.

$^{11}\text{B}$  NMR (176, MHz,  $\text{CDCl}_3$ ):  $\delta_{\text{B}}$  21.7 (s).

**Preparation 4,4,5,5-tetramethyl-2-(*p*-tolylloxy)-1,3,2-dioxaborolane:**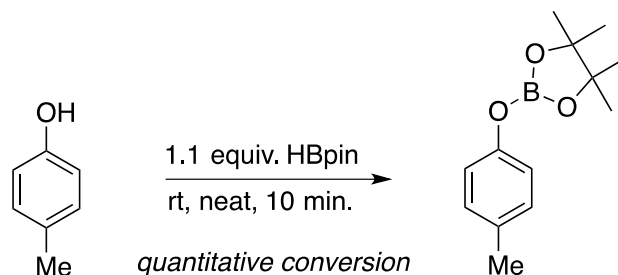

The Bpin protected *p*-cresol was prepared as described in the general procedure using the *p*-cresol (54 mg, 0.5 mmol) and HBpin (80  $\mu$ L, 0.55 mmol).

$^1\text{H}$  NMR (500 MHz,  $\text{CDCl}_3$ ):  $\delta_{\text{H}}$  7.07-7.03(m, 2H), 6.97 – 6.93 (m, 2H), 2.27 (s, 3H) 1.29 (s, 12H).

$^{13}\text{C}$  NMR (125 MHz,  $\text{CDCl}_3$ ):  $\delta_{\text{C}}$  151.2, 132.4, 129.8, 119.2, 83.5, 24.6, 20.7

$^{11}\text{B}$  NMR (176, MHz,  $\text{CDCl}_3$ ):  $\delta_{\text{B}}$  21.7 (s).

**Preparation of 2-(4-(*tert*-butyl)phenoxy)-4,4,5,5-tetramethyl-1,3,2-dioxaborolane:**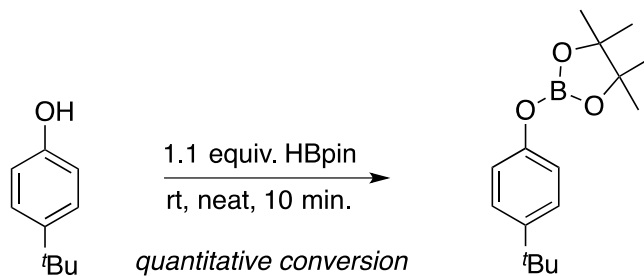

The Bpin protected 4-*tert*-butylphenol was prepared as described in the general procedure using 4-*tert*-butylphenol (75 mg, 0.5 mmol) and HBpin (80  $\mu$ L, 0.55 mmol).

$^1\text{H}$  NMR (500 MHz,  $\text{CDCl}_3$ ):  $\delta_{\text{H}}$  7.28-7.25 (m, 2H), 7.01 – 6.98 (m, 2H), 1.30 (s, 12H), 1.30 (s, 9H).

$^{13}\text{C}$  NMR (125 MHz,  $\text{CDCl}_3$ ):  $\delta_{\text{C}}$  151.0, 145.6, 126.1, 118.8, 83.5, 34.2, 31.5, 24.6.

$^{11}\text{B}$  NMR (176, MHz,  $\text{CDCl}_3$ ):  $\delta_{\text{B}}$  21.7 (br s).

**Preparation of 4,4,5,5-tetramethyl-2-(4-(trifluoromethyl)phenoxy)-1,3,2-dioxaborolane:**

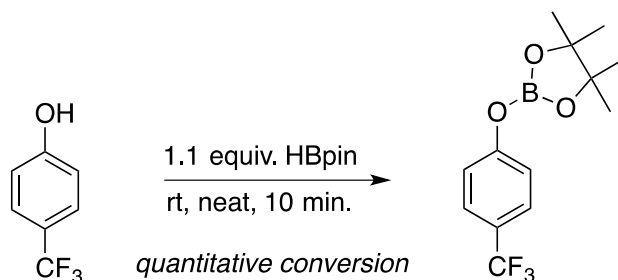

The Bpin protected 4-trifluorophenol was prepared as described in the general procedure using 4-trifluorophenol (81 mg, 0.5 mmol) and HBpin (80  $\mu\text{L}$ , 0.55 mmol).

$^1\text{H}$  NMR (500 MHz,  $\text{CDCl}_3$ ):  $\delta_{\text{H}}$  7.55 (d,  $J = 8.8$  Hz, 2H), 7.21 (d,  $J = 8.8$  Hz, 2H), 1.34 (s, 12H).

$^{13}\text{C}$  NMR (125 MHz,  $\text{CDCl}_3$ ):  $\delta_{\text{C}}$  156.0, 126.8 (q,  $^3J_{\text{C-F}} = 3.9$  Hz), 125.3 (q,  $^2J_{\text{C-F}} = 32$  Hz), 124.2, (q,  $^1J_{\text{C-F}} = 271$  Hz), 119.8, 83.9, 24.6.

$^{11}\text{B}$  NMR (176, MHz,  $\text{CDCl}_3$ ):  $\delta_{\text{B}}$  21.7 (s).

**Preparation of ethyl 4-((4,4,5,5-tetramethyl-1,3,2-dioxaborolan-2-yl)oxy)benzoate:**

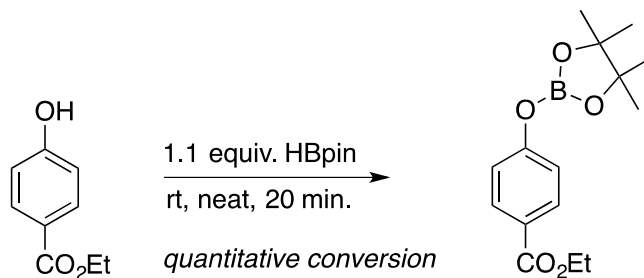

The Bpin protected ethyl 4-hydroxybenzoate was prepared as described in the general procedure using ethyl 4-hydroxybenzoate (83 mg, 0.5 mmol) and HBpin (80  $\mu\text{L}$ , 0.55 mmol).

$^1\text{H}$  NMR (500 MHz,  $\text{CDCl}_3$ ):  $\delta_{\text{H}}$  7.98-7.94 (m, 2H), 7.14 – 7.10 (m, 2H), 4.32 (q,  $J = 7.1$  Hz, 2H), 1.34 (t,  $J = 7.2$  Hz, 3H), 1.30 (s, 12H).

$^{13}\text{C}$  NMR (125 MHz,  $\text{CDCl}_3$ ):  $\delta_{\text{C}}$  166.2, 157.2, 131.3, 125.4, 119.4, 83.9, 60.7, 24.6, 14.3.

$^{11}\text{B}$  NMR (176, MHz,  $\text{CDCl}_3$ ):  $\delta_{\text{B}}$  21.7 (br s).

**Preparation of 2-(4-bromo-2-chlorophenoxy)-4,4,5,5-tetramethyl-1,3,2-dioxaborolane:**

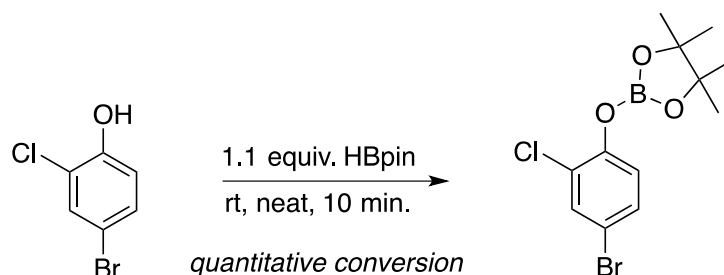

The Bpin protected 4-bromo-2-chlorophenol was prepared as described in the general procedure using 4-bromo-2-chlorophenol (104 mg, 0.5 mmol) and HBpin (80  $\mu$ L, 0.55 mmol).

$^1\text{H}$  NMR (500 MHz,  $\text{CDCl}_3$ ):  $\delta_{\text{H}}$  7.52 (d,  $J = 2.4$  Hz, 1H), 7.31 (dd,  $J = 8.6, 2.5$  Hz, 1H), 7.07 (d,  $J = 8.6$  Hz, 1H), 1.29 (s, 12H).

$^{13}\text{C}$  NMR (125 MHz,  $\text{CDCl}_3$ ):  $\delta_{\text{C}}$  148.9, 132.7, 130.7, 126.4, 122.6, 115.9, 84.2, 24.6.

$^{11}\text{B}$  NMR (176, MHz,  $\text{CDCl}_3$ ):  $\delta_{\text{B}}$  21.6 (s).

**Preparation of 2-(2,4-dichlorophenoxy)-4,4,5,5-tetramethyl-1,3,2-dioxaborolane:**

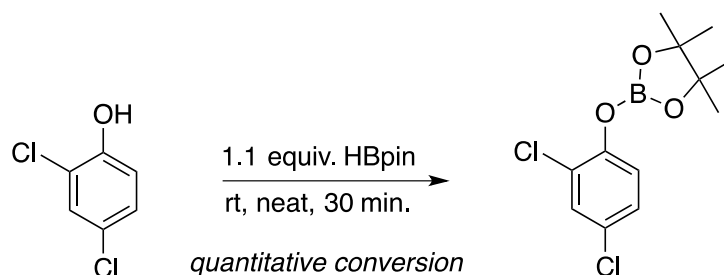

The Bpin protected 2,4-dichlorophenol was prepared as described in the general procedure using 2,4-dichlorophenol (82 mg, 0.5 mmol) and HBpin (80  $\mu$ L, 0.55 mmol).

$^1\text{H}$  NMR (500 MHz,  $\text{CDCl}_3$ ):  $\delta_{\text{H}}$  7.35 ( $J = 2.4$  Hz, 1H), 7.14 (dd,  $J = 8.6, 2.6$  Hz, 1H), 7.08 (d,  $J = 8.8$  Hz, 1H), 1.29 (s, 12H).

$^{13}\text{C}$  NMR (125 MHz,  $\text{CDCl}_3$ ):  $\delta_{\text{C}}$  148.5, 129.8, 127.8, 126.0, 122.1, 117.1, 84.2, 24.6.

$^{11}\text{B}$  NMR (176, MHz,  $\text{CDCl}_3$ ):  $\delta_{\text{B}}$  21.6 (s).

**Preparation of 2-(3,4-dimethylphenoxy)-4,4,5,5-tetramethyl-1,3,2-dioxaborolane:**

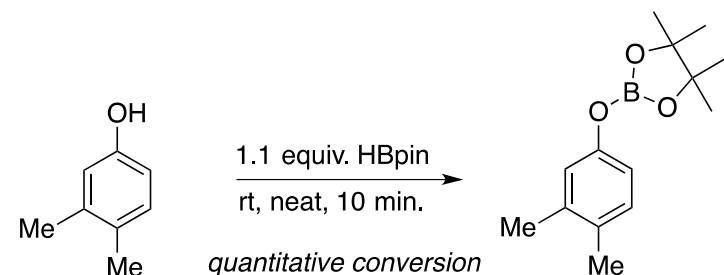

The Bpin protected 3,4-dimethylphenol was prepared as described in the general procedure using 3,4-dimethylphenol (61 mg, 0.5 mmol) and HBpin (80  $\mu$ L, 0.55 mmol).

$^1\text{H}$  NMR (500 MHz,  $\text{CDCl}_3$ ):  $\delta_{\text{H}}$  7.03 (d,  $J = 8.3$  Hz, 1H), 6.87 (d,  $J = 2.5$  Hz, 1H), 6.84 (dd,  $J = 8.2, 2.6$  Hz, 1H), 2.21 (s, 3H), 2.17 (s, 3H), 1.29 (s, 12H).

$^{13}\text{C}$  NMR (125 MHz,  $\text{CDCl}_3$ ):  $\delta_{\text{C}}$  151.4, 137.6, 131.2, 130.2, 120.7, 116.6, 83.4, 24.6, 19.9, 19.0.

$^{11}\text{B}$  NMR (176, MHz,  $\text{CDCl}_3$ ):  $\delta_{\text{B}}$  21.8 (s).

#### Preparation of 2-(4-chloro-3-methylphenoxy)-4,4,5,5-tetramethyl-1,3,2-dioxaborolane:

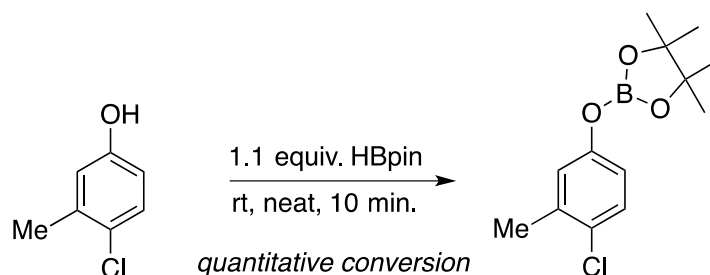

The Bpin protected 4-chloro-3-methylphenol was prepared as described in the general procedure using 4-chloro-3-methylphenol (71 mg, 0.5 mmol) and HBpin (80  $\mu$ L, 0.55 mmol).

$^1\text{H}$  NMR (500 MHz,  $\text{CDCl}_3$ ):  $\delta_{\text{H}}$  7.19 (d,  $J = 8.6$  Hz, 1H), 6.93 (d,  $J = 3.0$  Hz, 1H), 6.85 (dd,  $J = 8.7, 3.1$  Hz, 1H), 2.31 (s, 3H), 1.30 (s, 12H)

$^{13}\text{C}$  NMR (125 MHz,  $\text{CDCl}_3$ ):  $\delta_{\text{C}}$  151.9, 136.9, 129.5, 128.4, 121.9, 118.3, 83.7, 24.6, 20.2

$^{11}\text{B}$  NMR (176, MHz,  $\text{CDCl}_3$ ):  $\delta_{\text{B}}$  21.7 (s).

#### Preparation of 2-(2-methoxy-4-methylphenoxy)-4,4,5,5-tetramethyl-1,3,2-dioxaborolane:

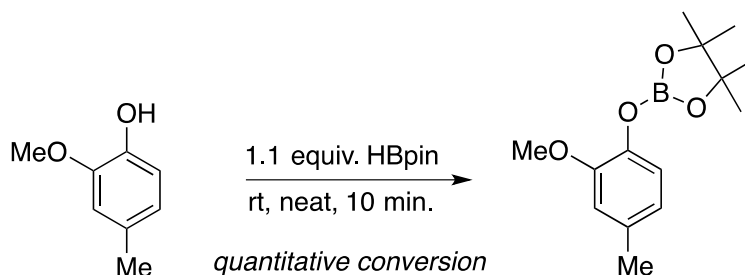

The Bpin protected 2-methoxy-4-methylphenol was prepared as described in the general procedure using 2-methoxy-4-methylphenol (69 mg, 0.5 mmol) and HBpin (80  $\mu$ L, 0.55 mmol).

$^1\text{H}$  NMR (500 MHz,  $\text{CDCl}_3$ ):  $\delta_{\text{H}}$  6.95 ( $J = 8.1$  Hz, 1H), 6.72 (s, 1H), 6.67 (d, 1H,  $J = 8.2$  Hz), 3.83 (s, 3H), 2.31 (s, 3H), 1.30 (s, 12H).

$^{13}\text{C}$  NMR (125 MHz,  $\text{CDCl}_3$ ):  $\delta_{\text{C}}$  149.7, 140.7, 133.5, 121.1, 120.1, 113.0, 83.4, 55.6, 24.5, 21.3.

$^{11}\text{B}$  NMR (176, MHz,  $\text{CDCl}_3$ ):  $\delta_{\text{B}}$  21.9 (s).

**Preparation of ethyl 3-((4,4,5,5-tetramethyl-1,3,2-dioxaborolan-2-yl)oxy)benzoate:**

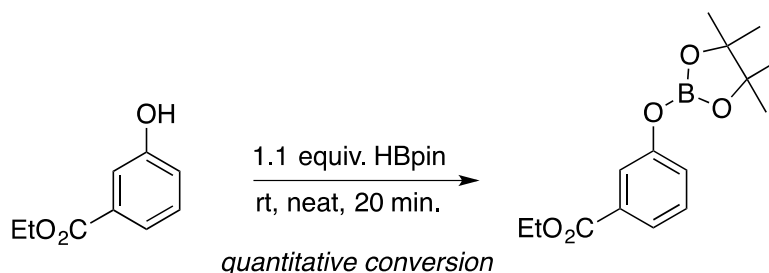

The Bpin protected ethyl 3-hydroxybenzoate was prepared as described in the general procedure using ethyl 3-hydroxybenzoate (83 mg, 0.5 mmol) and HBpin (80  $\mu\text{L}$ , 0.55 mmol).

$^1\text{H}$  NMR (500 MHz,  $\text{CDCl}_3$ ):  $\delta_{\text{H}}$  7.77-7.74 (m, 2H), 7.35 (t,  $J = 8.0$  Hz, 1H), 7.30 – 7.27 (m, 1H), 4.37 (q,  $J = 7.0$  Hz, 2H), 1.39 (t,  $J = 7.0$  Hz, 3H), 1.33 (s, 12H).

$^{13}\text{C}$  NMR (125 MHz,  $\text{CDCl}_3$ ):  $\delta_{\text{C}}$  166.2, 153.4, 131.8, 129.2, 124.3, 124.1, 120.7, 83.8, 61.0, 24.6, 14.3.

$^{11}\text{B}$  NMR (176, MHz,  $\text{CDCl}_3$ ):  $\delta_{\text{B}}$  21.7 (s).

**Preparation of 4,4,5,5-tetramethyl-2-(*o*-tolylxy)-1,3,2-dioxaborolane:**

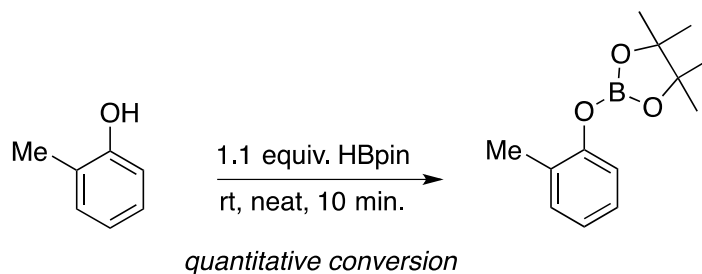

The Bpin protected *o*-cresol was prepared as described in the general procedure using *o*-cresol (54 mg, 0.5 mmol) and HBpin (80  $\mu\text{L}$ , 0.55 mmol).

$^1\text{H}$  NMR (500 MHz,  $\text{CDCl}_3$ ):  $\delta_{\text{H}}$  7.18-7.12 (m, 2H), 7.09 – 7.08 (m, 1H), 6.99 (ddd,  $J = 7.3, 7.3, 1.2$  Hz, 1H), 2.25 (s, 3H), 1.33 (s, 12H).

$^{13}\text{C}$  NMR (125 MHz,  $\text{CDCl}_3$ ):  $\delta_{\text{C}}$  151.9, 130.9, 128.4, 126.7, 123.3, 119.4, 83.5, 24.6, 16.4

$^{11}\text{B}$  NMR (176, MHz,  $\text{CDCl}_3$ ):  $\delta_{\text{B}}$  21.7 (s).

**Preparation of 4,4,5,5-tetramethyl-2-phenoxy-1,3,2-dioxaborolane:**

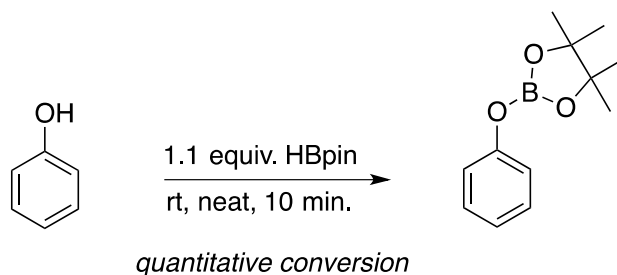

The Bpin protected phenol was prepared as described in the general procedure using phenol (47 mg, 0.5 mmol) and HBpin (80  $\mu$ L, 0.55 mmol) and stirring for ten minutes.

$^1\text{H}$  NMR (500 MHz,  $\text{CDCl}_3$ ):  $\delta_{\text{H}}$  7.29(t,  $J = 7.7$  Hz, 2H) , 7.11 (d,  $J = 7.9$  Hz, 2H), 7.06 (t,  $J = 7.0$  Hz, 1H), 1.33 (s, 12H)

$^{13}\text{C}$  NMR (125 MHz,  $\text{CDCl}_3$ ):  $\delta_{\text{C}}$  153.4, 129.3, 123.1, 119.5, 83.5, 24.6.

$^{11}\text{B}$  NMR (176, MHz,  $\text{CDCl}_3$ ):  $\delta_{\text{B}}$  21.7 (s).

**Preparation of 2-(3-methoxyphenoxy)-4,4,5,5-tetramethyl-1,3,2-dioxaborolane:**

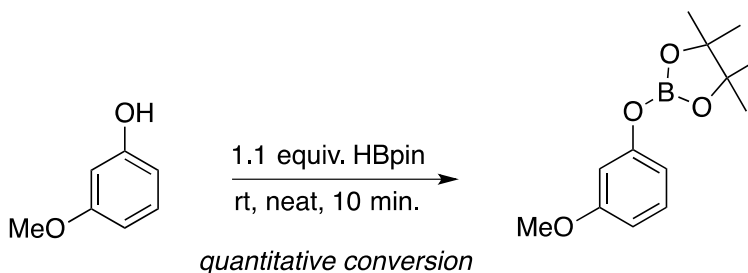

The Bpin protected 3-methoxyphenol was prepared as described in the general procedure using 3-methoxyphenol (62 mg, 0.5 mmol) and HBpin (80  $\mu$ L, 0.55 mmol).

$^1\text{H}$  NMR (500 MHz,  $\text{CDCl}_3$ ):  $\delta_{\text{H}}$  7.15 (t,  $J = 8.2$  Hz), 6.72 (ddd,  $J = 8.0, 2.3, 0.87$  Hz, 1H), 6.68 (t,  $J = 2.3$  Hz, 1H), 6.63 (ddd,  $J = 8.3, 2.4, 0.87$  Hz, 1H), 3.76 (s, 3H), 1.30 (s, 12H).

$^{13}\text{C}$  NMR (125 MHz,  $\text{CDCl}_3$ ):  $\delta_{\text{C}}$  160.5, 154.5, 129.7, 111.9, 108.6, 105.9, 83.6, 55.3, 24.6.

$^{11}\text{B}$  NMR (176, MHz,  $\text{CDCl}_3$ ):  $\delta_{\text{B}}$  21.7 (s).

**Preparation of 2-(3-chlorophenoxy)-4,4,5,5-tetramethyl-1,3,2-dioxaborolane:**

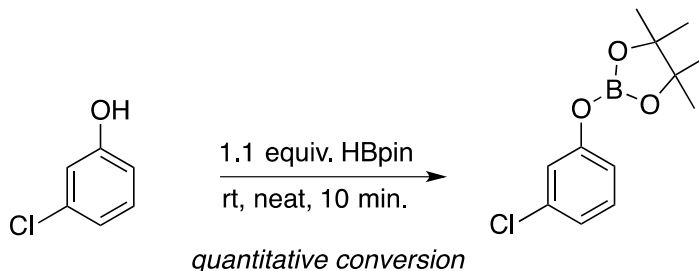

The Bpin protected 3-chlorophenol was prepared as described in the general procedure using 3-chlorophenol (64.3 mg, 0.5 mmol) and HBpin (80  $\mu$ L, 0.55 mmol).

$^1\text{H}$  NMR (500 MHz,  $\text{CDCl}_3$ ):  $\delta_{\text{H}}$  7.17 (t,  $J = 8.2$  Hz, 1H), 7.10 (t,  $J = 2.4$  Hz, 1H), 7.02 (ddd,  $J = 7.8, 3.0, 1.0$  Hz, 1H), 6.97 (ddd,  $J = 8.3$  Hz, 3.0 Hz, 1.0 Hz, 1H), 1.30 (s, 12H).

$^{13}\text{C}$  NMR (125 MHz,  $\text{CDCl}_3$ ):  $\delta_{\text{C}}$  154.1, 134.4, 130.0, 123.4, 120.1, 117.9, 83.8, 24.6.

$^{11}\text{B}$  NMR (176, MHz,  $\text{CDCl}_3$ ):  $\delta_{\text{B}}$  21.7 (s).

### Preparation of 4,4,5,5-tetramethyl-2-(naphthalen-2-yloxy)-1,3,2-dioxaborolane:

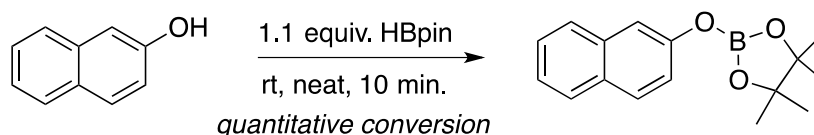

The Bpin protected 2-naphthol was prepared as described in the general procedure using 2-naphthol (72 mg, 0.5 mmol) and HBpin (80  $\mu$ L, 0.55 mmol).

$^1\text{H}$  NMR (500 MHz,  $\text{CDCl}_3$ ):  $\delta_{\text{H}}$  7.78 (m, 3H), 7.49 (d,  $J = 2.4$  Hz, 1H), 7.42 (ddd,  $J = 8.1, 5.9, 1.3$  Hz, 1H), 7.36 (ddd,  $J = 8.2, 6.0, 1.4$  Hz, 1H), 7.26 (dd,  $J = 8.8, 2.5$  Hz, 1H), 1.33 (s, 12H).

$^{13}\text{C}$  NMR (125 MHz,  $\text{CDCl}_3$ ):  $\delta_{\text{C}}$  151.3, 134.2, 130.1, 129.3, 127.6, 127.2, 126.3, 124.5, 120.7, 115.2, 83.7, 24.6.

$^{11}\text{B}$  NMR (176, MHz,  $\text{CDCl}_3$ ):  $\delta_{\text{B}}$  21.9 (s).

### Preparation of the Authentic Boronic Esters for Phenols:

#### 2-(2-Hydroxyphenyl)1,3,2-dioxaborolane from 2-hydroxyphenylboronic acid and ethylene glycol:

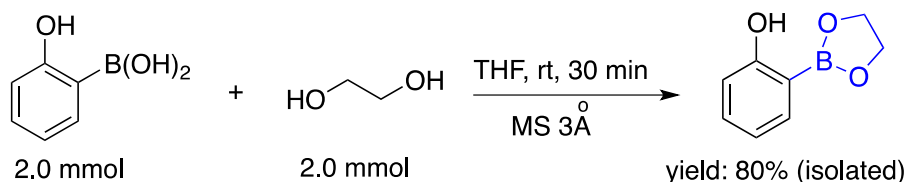

A 5 mL conical vial was charged with 2-hydroxyphenylboronic acid (276 mg, 2.0 mmol), ethylene glycol (122 mg, 2.0 mmol) and molecular sieves (3 $\text{\AA}$ , 1.0 gm). Dry THF (3.0 mL) was added and the vial was capped with a teflon pressure cap and stirred at room temperature. After 30 min, the reaction mixture was filtered immediately through a short pad of celite under an inert atmosphere, which was then evaporated under reduced pressure to afford 265.0 mg of the boronic ester (80%) as oil. *The compound is highly air sensitive and decomposed rapidly.*



$^1\text{H}$  NMR (500 MHz,  $\text{CDCl}_3$ ):  $\delta_{\text{H}}$  7.64 (dd,  $J = 7.5, 1.5$  Hz, 1H), 7.61 (s, 1H), 7.39 - 7.42 (m, 1H), 6.90 - 6.93 (m, 2H), 4.42 (s, 4H).

$^{13}\text{C}$  NMR (125 MHz,  $\text{CDCl}_3$ ):  $\delta_{\text{C}}$  163.4, 135.8, 134.1, 119.7, 115.6, 65.9.

$^{11}\text{B}$  NMR (160 MHz,  $\text{CDCl}_3$ ):  $\delta_{\text{B}}$  31.3 (br. s).

HRMS (ESI)  $m/z$  calcd for  $\text{C}_8\text{H}_8\text{BO}_3$  [ $\text{M} - \text{H}$ ] $^-$  163.0568, found 163.0568.

**2-(3-Hydroxyphenyl)1,3,2-dioxaborolane from 3-hydroxyphenylboronic acid and ethylene glycol:**

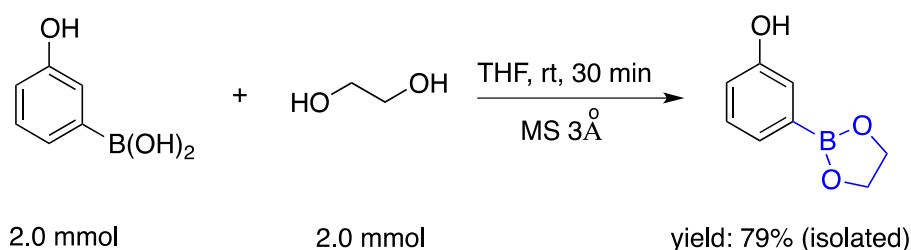

A 5 mL conical vial was charged with 3-hydroxyphenylboronic acid (276 mg, 2.0 mmol), ethylene glycol (122 mg, 2.0 mmol) and molecular sieves (3Å, 1.0 gm). Dry THF (3.0 mL) was added and the vial was capped with a teflon pressure cap and stirred at room temperature. After 30 min, the reaction mixture was filtered immediately through a short pad of celite under an inert atmosphere, which was then evaporated under reduced pressure to afford 255 mg of the boronic ester (77%) as white solid (mp = 128-129 °C). *The compound is highly air sensitive and decomposed rapidly.*

$^1\text{H}$  NMR (500 MHz,  $\text{CDCl}_3$ ):  $\delta_{\text{H}}$  7.39 (d,  $J = 7.5$  Hz, 1H), 7.20 - 7.34 (m, 2H), 6.98 (dd,  $J = 7.5, 2.0$  Hz, 1H), 5.50 (br. s., 1H), 4.39 (s, 4H).

$^{13}\text{C}$  NMR (125 MHz,  $\text{CDCl}_3$ ):  $\delta_{\text{C}}$  155.2, 128.9, 126.6, 120.5, 119.2, 66.1.

$^{11}\text{B}$  NMR (160 MHz,  $\text{CDCl}_3$ ):  $\delta_{\text{B}}$  31.5 (br. s).

HRMS (ESI)  $m/z$  calcd for  $\text{C}_8\text{H}_8\text{BO}_3$  [ $\text{M} - \text{H}$ ] $^-$  163.0568, found 163.0568.

**2-(4-Hydroxyphenyl)1,3,2-dioxaborolane from 4-hydroxyphenylboronic acid and ethylene glycol:**

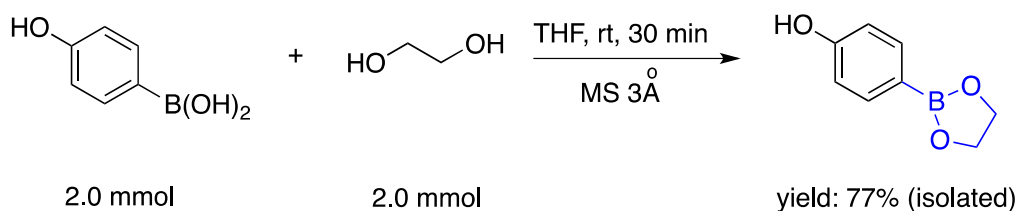

A 5 mL conical vial was charged with 3-hydroxyphenylboronic acid (276 mg, 2.0 mmol), ethylene glycol (122 mg, 2.0 mmol) and molecular sieves (3Å, 1.0 gm). Dry THF (3.0 mL) was added and

the vial was capped with a teflon pressure cap and stirred at room temperature. After 30 min, the reaction mixture was filtered immediately through a short pad of celite under an inert atmosphere, which was then evaporated under reduced pressure to afford 260 mg of the boronic ester (79%) as white solid (mp = 131-132 °C). *The compound is highly air sensitive and decomposed rapidly.*

$^1\text{H}$  NMR (500 MHz,  $\text{CDCl}_3$ ):  $\delta_{\text{H}}$  7.73 (d,  $J$  = 8.5 Hz, 2H), 6.85 (d,  $J$  = 8.5 Hz, 2H), 5.35 (s, 1H), 4.37 (s, 4H).

$^{13}\text{C}$  NMR (125 MHz,  $\text{CDCl}_3$ ):  $\delta_{\text{C}}$  158.5, 136.9, 115.0, 66.0.

$^{11}\text{B}$  NMR (160 MHz,  $\text{CDCl}_3$ ):  $\delta_{\text{B}}$  31.5 (br. s).

HRMS (ESI)  $m/z$  calcd for  $\text{C}_8\text{H}_8\text{BO}_3$  [ $\text{M} - \text{H}$ ] $^-$  163.0568, found 163.0568.

### 2-(2-Hydroxyphenyl)-4,4,5,5-tetramethyl-1,3,2-dioxaborolane from 2-hydroxyphenylboronic acid and pinacol:

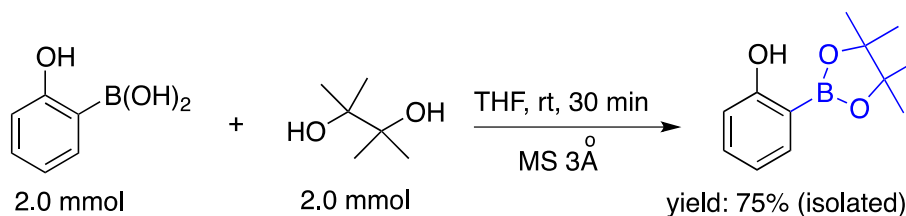

A 5 mL conical vial was charged with 2-hydroxyphenylboronic acid (276 mg, 2.0 mmol), pinacol (236 mg, 2.0 mmol) and molecular sieves (3Å, 1.0 g). Dry THF (3.0 mL) was added and the vial was capped with a teflon pressure cap and stirred at room temperature. After 30 min, the reaction mixture was filtered immediately through a short pad of celite under inert atmosphere, which was then evaporated under reduced pressure to afford 330 mg of the boronic ester (80%) as colorless oil. The NMR data of this compound were in accordance with the literature reported compound.<sup>5</sup>

### 2-(3-Hydroxyphenyl)-4,4,5,5-tetramethyl-1,3,2-dioxaborolane

This compound is commercially available and was purchased from Sigma-Aldrich and used without any further purification.

### 2-(4-Hydroxyphenyl)-4,4,5,5-tetramethyl-1,3,2-dioxaborolane from 4-hydroxyphenylboronic acid and pinacol:

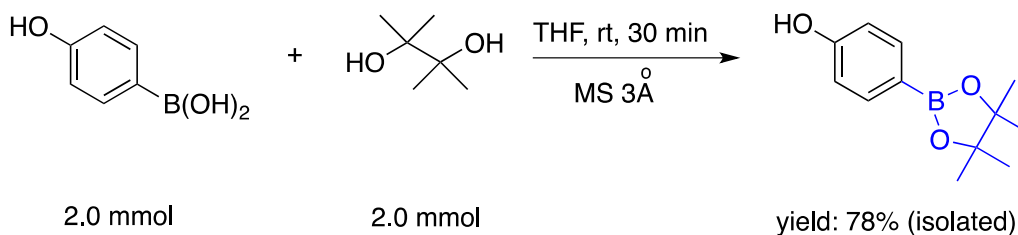

A 5 mL conical vial was charged with 4-hydroxyphenylboronic acid (276 mg, 2.0 mmol), pinacol (236 mg, 2.0 mmol) and molecular sieves (3Å, 1.0 g). Dry THF (3.0 mL) was added and the vial was capped with a teflon pressure cap and stirred at room temperature. After 30 min, the reaction mixture was filtered immediately through a short pad of celite under an inert atmosphere, which was then evaporated under reduced pressure to afford 341 mg of the boronic ester (78%) as white solid (mp = 102-105 °C). The NMR data of this compound were in accordance with the literature reported compound.<sup>6</sup>

### Synthesis of 2,2'-bi(1,3,2-dioxaborolane) from Tetrahydroxydiboron:

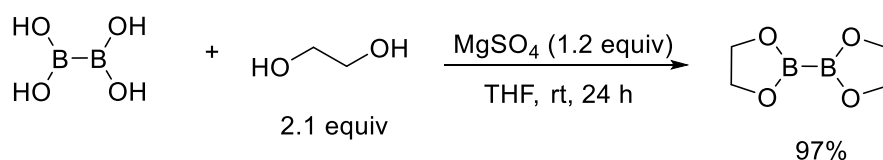

This compound was synthesized by modifying the previously reported procedure.<sup>7</sup> A 100 mL round bottom flask was charged with tetrahydroxydiboron (1.0 g, 11.2 mmol, 1 equiv), dry MgSO<sub>4</sub> (1.61 g, 1.2 equiv) and dry THF (~20 mL) then sealed with a septa. To this solution was added freshly distilled ethylene glycol (1.31 mL, 23.4 mmol, 2.1 equiv). After stirring for 24 h at room temperature, the reaction mixture was filtered through a medium glass frit using approximately 30 mL THF to aid transfer and wash the MgSO<sub>4</sub>. The THF solution was evaporated under reduced pressure to afford a white solid. The solid was dried under highvac to yield 1.53 g of pure B<sub>2</sub>eg<sub>2</sub> (97%). It should be noted that if further purification is necessary B<sub>2</sub>eg<sub>2</sub> sublimes at 0.01 mm Hg pressure and 65-70 °C. (mp = 159-160 °C).

<sup>1</sup>H NMR (500 MHz, CDCl<sub>3</sub>): δ<sub>H</sub> 4.21 (s, 4H).

<sup>13</sup>C NMR (125 MHz, CDCl<sub>3</sub>): δ<sub>C</sub> 65.3.

<sup>11</sup>B NMR (160 MHz, CDCl<sub>3</sub>): δ<sub>B</sub> 30.9 (br. s).

HRMS (ESI) *m/z* calcd for C<sub>4</sub>H<sub>9</sub>B<sub>2</sub>O<sub>4</sub> [M + H]<sup>+</sup> 143.0687, found 143.0685.

### Borylation of 4-Chlorophenol with B<sub>2</sub>pin<sub>2</sub> (1a):

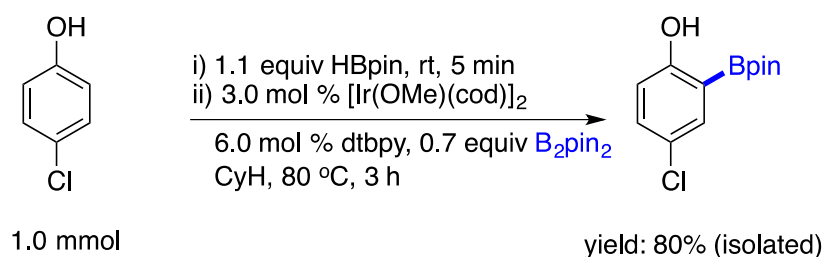



In a glovebox, a 5 mL conical vial was charged with 2-chloro-5-hydroxypyridine (129 mg, 1.0 mmol) and pinacolborane (160  $\mu$ L, 1.1 equiv) in THF (1.5 mL) and stirred for 5 min at room temperature. To this mixture, [Ir(OMe)(cod)]<sub>2</sub> (10 mg, 1.5 mol %, 0.015 mmol), dtbpy (8 mg, 3.0 mol %, 0.03 mmol), and B<sub>2</sub>pin<sub>2</sub> (127 mg, 0.5 equiv) was charged. Additional THF (1.5 mL) was added under an inert atmosphere. The vial was capped with a teflon pressure cap and placed into a pre-heated aluminum block at 80 °C. The reaction mixture was stirred for 5 hours. The reaction was then cooled to room temperature and transferred to a round bottom flask. It was washed with additional THF (3 mL). The solution was cooled to 0 °C and degased with N<sub>2</sub> for 5 minutes. Then, KHF<sub>2</sub> (2.2 mL, 8.8 mmol, 4.0 M in H<sub>2</sub>O) was added via syringe dropwise. The reaction was allowed to stir at 0 °C for 10 minutes, then the ice bath was removed and the reaction warmed to room temperature. After stirring at room temperature for 16 h, the reaction was filtered, and the recovered solid washed with THF to afford the organotrifluoroborate product (87%) as a white solid (mp = 226 – 230 °C dec).

<sup>1</sup>H NMR (500 MHz, (CD<sub>3</sub>)<sub>2</sub>CO):  $\delta_{\text{H}}$  7.65 (s, 1H), 7.47 (q, 1H,  $J=11.4$  Hz), 7.15 (br, 1H)

<sup>13</sup>C NMR (125 MHz, (CD<sub>3</sub>)<sub>2</sub>SO):  $\delta_{\text{C}}$  156.18, 140.18, 135.58, 127.59 (q, 1.88 Hz)

<sup>11</sup>B NMR (160 MHz, (CD<sub>3</sub>)<sub>2</sub>CO):  $\delta_{\text{B}}$  2.65 (q,  $J=51.5$  Hz)

HRMS (ESI)  $m/z$  calcd for C<sub>5</sub>H<sub>3</sub>BClF<sub>3</sub>NO [M-K]<sup>-</sup> 195.9955, found 195.9948

#### Borylation of 4-Fluorophenol with B<sub>2</sub>pin<sub>2</sub> (1c):

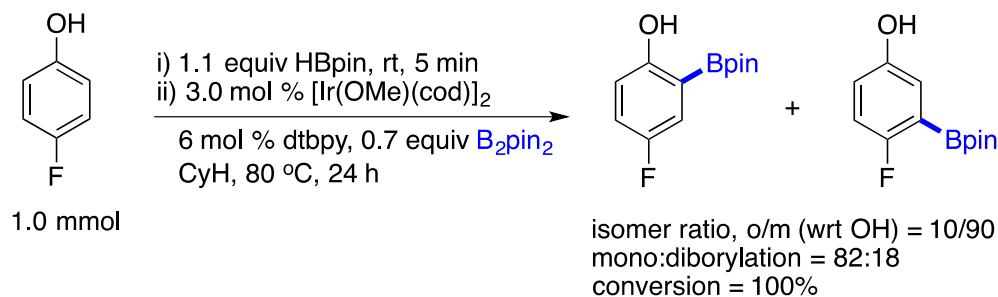

In a glovebox, a 5 mL conical vial was charged with 4-fluorophenol (112 mg, 1.0 mmol) and pinacolborane (160  $\mu$ L, 1.1 equiv) and stirred for 5 min at room temperature. To this mixture, [Ir(OMe)(cod)]<sub>2</sub> (20 mg, 3.0 mol %, 0.03 mmol), dtbpy (16 mg, 6.0 mol %, 0.06 mmol), and B<sub>2</sub>pin<sub>2</sub> (178 mg, 0.7 equiv) was charged. Dry cyclohexane (3 mL, 0.33 M) was added under an inert atmosphere. The vial was capped with a teflon pressure cap and placed into a pre-heated aluminum block at 80 °C. The reaction mixture was stirred for 24 h. GC-FID showed 100% conversion of

the starting material. The ratio of products was 10:90 (ortho:meta wrt to OH), and 82:18 (monoborylation:diborylation).

### Borylation of 4-methoxyphenol with B<sub>2</sub>pin<sub>2</sub> (1d):

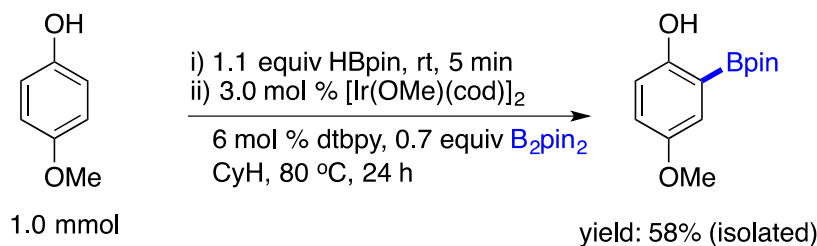

In a glovebox, a 5 mL conical vial was charged with 4-methoxyphenol (124 mg, 1.0 mmol) and pinacolborane (160  $\mu$ L, 1.1 equiv) and stirred for 5 min at room temperature. To this mixture, [Ir(OMe)(cod)]<sub>2</sub> (20 mg, 3.0 mol %, 0.03 mmol), dtbpy (16 mg, 6.0 mol %, 0.06 mmol), and B<sub>2</sub>pin<sub>2</sub> (178 mg, 0.7 equiv) was charged. Dry cyclohexane (3 mL, 0.33 M) was added under an inert atmosphere. The vial was capped with a teflon pressure cap and placed into a pre-heated aluminum block at 80 °C. The reaction mixture was stirred for 24 h. After completion (judged by GC), the ratio of ortho/meta (wrt OH) borylated product was found to be 65/35. The cyclohexane was removed under reduced pressure and chromatographic separation with silica gel (chloroform as eluent) gave 144.0 mg of the ortho-borylated product (58%) as a colorless oil. NMR data was in accordance with the literature reported data.<sup>5</sup>

<sup>1</sup>H NMR (500 MHz, CDCl<sub>3</sub>):  $\delta_{\text{H}}$  7.52 (s, 1H), 7.10 (d,  $J = 3.0$  Hz, 1H), 6.97 (dd,  $J = 9.5, 3.0$  Hz, 1H), 6.83 (d,  $J = 9.5$  Hz, 1H), 3.78 (s, 3H), 1.37 (s, 12H).

<sup>13</sup>C NMR (125 MHz, CDCl<sub>3</sub>):  $\delta_{\text{C}}$  157.9, 152.6, 121.3, 118.0, 116.5, 84.5, 55.8, 24.8.

<sup>11</sup>B NMR (160 MHz, CDCl<sub>3</sub>):  $\delta_{\text{B}}$  31.1 (br. s).

### Borylation of 4-bromophenol with B<sub>2</sub>pin<sub>2</sub> (1e):

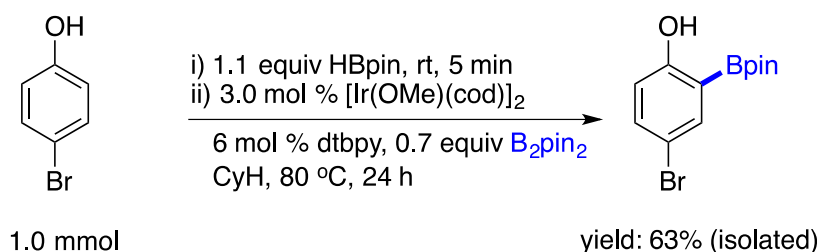

In a glovebox, a 5 mL conical vial was charged with 4-bromophenol (173 mg, 1.0 mmol) and pinacolborane (160  $\mu$ L, 1.1 equiv) and stirred for 5 min at room temperature. To this mixture, [Ir(OMe)(cod)]<sub>2</sub> (20 mg, 3.0 mol %, 0.03 mmol), dtbpy (16 mg, 6.0 mol %, 0.06 mmol), and B<sub>2</sub>pin<sub>2</sub>

(178 mg, 0.7 equiv) was charged. Dry cyclohexane (3 mL, 0.33 M) was added under an inert atmosphere. The vial was capped with a teflon pressure cap and placed into a pre-heated aluminum block at 80 °C. The reaction mixture was stirred for 24 h. After completion (judged by GC), the cyclohexane was removed under reduced pressure and chromatographic separation with silica gel (chloroform as eluent) gave 188 mg of the ortho-borylated product (63%) as a yellow solid (mp = 68-69 °C).

$^1\text{H}$  NMR (500 MHz,  $\text{CDCl}_3$ ):  $\delta_{\text{H}}$  7.78 (s, 1H), 7.70 (d,  $J = 3.0$  Hz, 1H), 7.44 (dd,  $J = 9.0, 2.5$  Hz, 1H), 6.78 (d,  $J = 9.0$  Hz, 1H), 1.37 (s, 12H).

$^{13}\text{C}$  NMR (125 MHz,  $\text{CDCl}_3$ ):  $\delta_{\text{C}}$  162.6, 137.8, 136.4, 117.6, 111.9, 84.9, 24.8.

$^{11}\text{B}$  NMR (160 MHz,  $\text{CDCl}_3$ ):  $\delta_{\text{B}}$  30.6 (br. s).

HRMS (ESI)  $m/z$  calcd for  $\text{C}_{12}\text{H}_{15}\text{BBrO}_3$  [ $\text{M} - \text{H}$ ] $^-$  297.0300, found 297.0299.

#### Borylation of 4-methylphenol with $\text{B}_2\text{pin}_2$ (1f):

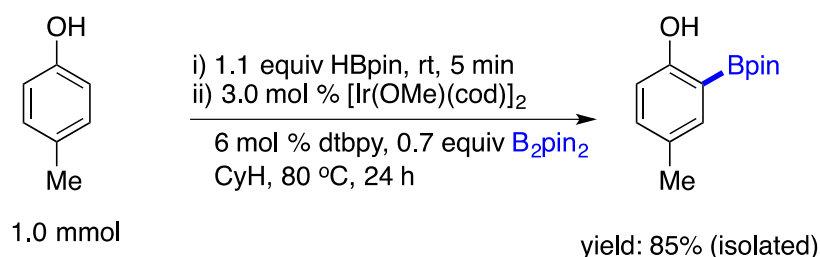

In a glovebox, a 5 mL conical vial was charged with 4-methylphenol (108 mg, 1.0 mmol) and pinacolborane (160  $\mu\text{L}$ , 1.1 equiv) and stirred for 5 min at room temperature. To this mixture,  $[\text{Ir}(\text{OMe})(\text{cod})]_2$  (20 mg, 3.0 mol %, 0.03 mmol), dtbpy (16 mg, 6.0 mol %, 0.06 mmol), and  $\text{B}_2\text{pin}_2$  (178 mg, 0.7 equiv) was charged. Dry cyclohexane (3 mL, 0.33 M) was added under an inert atmosphere. The vial was capped with a teflon pressure cap and placed into a pre-heated aluminum block at 80 °C. The reaction mixture was stirred for 24 h. After completion (judged by GC), cyclohexane was removed under reduced pressure and chromatographic separation with silica gel (chloroform as eluent) gave 199 mg of the borylated product (85%) as a pale yellow solid (mp = 35-36 °C). The NMR data were in accordance with the literature reported data.<sup>5</sup>

$^1\text{H}$  NMR (500 MHz,  $\text{CDCl}_3$ ):  $\delta_{\text{H}}$  7.66 (s, 1H), 7.42 (d,  $J = 1.5$  Hz, 1H), 7.20 (dd,  $J = 8.5, 2.0$  Hz, 1H), 6.81 (d,  $J = 8.5$  Hz, 1H), 2.27 (s, 3H), 1.38 (s, 12H).

$^{13}\text{C}$  NMR (125 MHz,  $\text{CDCl}_3$ ):  $\delta_{\text{C}}$  161.5, 135.6, 134.6, 128.5, 115.3, 84.4, 24.8, 20.3.

$^{11}\text{B}$  NMR (160 MHz,  $\text{CDCl}_3$ ):  $\delta_{\text{B}}$  31.0 (br. s).

**Borylation of 4-tertbutylphenol with B<sub>2</sub>pin<sub>2</sub> (1g):**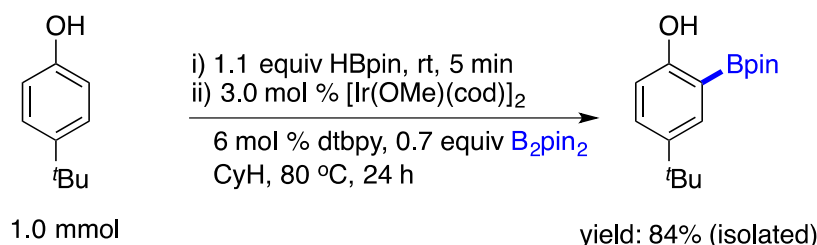

In a glovebox, a 5 mL conical vial was charged with 4-tertbutylphenol (150 mg, 1.0 mmol) and pinacolborane (160  $\mu$ L, 1.1 equiv) and stirred for 5 min at room temperature. To this mixture, [Ir(OMe)(cod)]<sub>2</sub> (20 mg, 3.0 mol %, 0.03 mmol), dtbpy (16 mg, 6.0 mol %, 0.06 mmol), and B<sub>2</sub>pin<sub>2</sub> (178 mg, 0.7 equiv) was charged. Dry cyclohexane (3 mL, 0.33 M) was added under an inert atmosphere. The vial was capped with a teflon pressure cap and placed into a pre-heated aluminum block at 80 °C. The reaction mixture was stirred for 24 h. After completion (judged by GC), cyclohexane was removed under reduced pressure and chromatographic separation with silica gel (chloroform as eluent) gave 233 mg of the borylated product (84%) as a white solid (mp = 78-79 °C).

<sup>1</sup>H NMR (500 MHz, CDCl<sub>3</sub>):  $\delta_{\text{H}}$  7.76 (s, 1H), 7.60 (d,  $J = 2.5$  Hz, 1H), 7.42 (dd,  $J = 8.5, 2.5$  Hz, 1H), 6.83 (d,  $J = 8.5$  Hz, 1H), 1.37 (s, 12H), 1.31 (s, 9H).

<sup>13</sup>C NMR (125 MHz, CDCl<sub>3</sub>):  $\delta_{\text{C}}$  161.5, 141.9, 131.9, 131.2, 115.0, 84.4, 34.0, 31.5, 24.8.

<sup>11</sup>B NMR (160 MHz, CDCl<sub>3</sub>):  $\delta_{\text{B}}$  30.6 (br. s).

HRMS (ESI)  $m/z$  calcd for C<sub>16</sub>H<sub>24</sub>BO<sub>3</sub> [M - H]<sup>-</sup> 275.1822, found 275.1825.

**Borylation of 4-trifluoromethylphenol with B<sub>2</sub>pin<sub>2</sub> (1h):**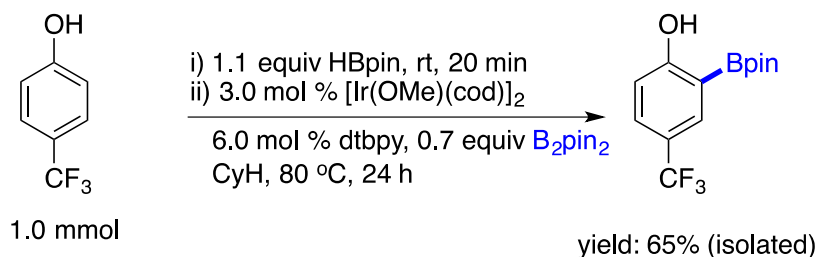

In a glovebox, a 5 mL conical vial was charged with 4-trifluoromethylphenol (162 mg, 1.0 mmol) and pinacolborane (160  $\mu$ L, 1.1 equiv) and stirred for 20 min at room temperature. To this mixture, [Ir(OMe)(cod)]<sub>2</sub> (20 mg, 3.0 mol %, 0.03 mmol), dtbpy (16 mg, 6.0 mol %, 0.06 mmol), and B<sub>2</sub>pin<sub>2</sub> (178 mg, 0.7 equiv) was charged. Dry cyclohexane (3 mL, 0.33 M) was added under an inert atmosphere. The vial was capped with a teflon pressure cap and placed into a pre-heated aluminum



block at 80 °C. The reaction mixture was stirred for 24 h. After completion (judged by GC), cyclohexane was removed under reduced pressure and chromatographic separation with silica gel (chloroform as eluent) gave 188 mg of the borylated product (63%) as a white solid (mp = 75-76 °C)

$^1\text{H}$  NMR (500 MHz,  $\text{CDCl}_3$ ):  $\delta_{\text{H}}$  8.16 (s, 1H), 7.89 (d,  $J = 1.5$  Hz, 1H), 7.61 (dd,  $J = 9.0, 1.5$  Hz, 1H), 6.96 (d,  $J = 9.0$  Hz, 1H), 1.39 (br. s., 12H).

$^{13}\text{C}$  NMR (125 MHz,  $\text{CDCl}_3$ ):  $\delta_{\text{C}}$  166.1, 133.2 (q,  $J = 3.7$  Hz), 130.7 (q,  $J = 3.1$  Hz), 124.5 (q,  $J = 271.8$  Hz), 121.9 (q,  $J = 33.0$  Hz), 116.0, 85.1, 24.8.

$^{11}\text{B}$  NMR (160 MHz,  $\text{CDCl}_3$ ):  $\delta_{\text{B}}$  30.6 (br. s).

HRMS (ESI)  $m/z$  calcd for  $\text{C}_{13}\text{H}_{15}\text{BF}_3\text{O}_3$   $[\text{M} - \text{H}]^-$  287.1069, found 287.1072.

### Borylation of 4-carboethoxyphenol with $\text{B}_2\text{pin}_2$ (1i):

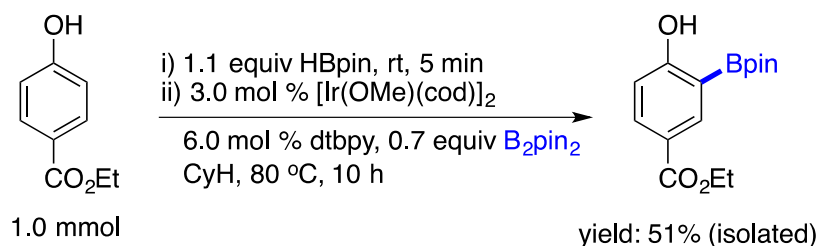

In a glovebox, a 5 mL conical vial was charged with 4-carboethoxyphenol (166 mg, 1.0 mmol) and pinacolborane (160  $\mu\text{L}$ , 1.1 equiv) and stirred for 5 min at room temperature. To this mixture,  $[\text{Ir}(\text{OMe})(\text{cod})]_2$  (20 mg, 3.0 mol %, 0.03 mmol), dtbpy (16 mg, 6.0 mol %, 0.06 mmol), and  $\text{B}_2\text{pin}_2$  (178 mg, 0.7 equiv) was charged. Dry cyclohexane (3 mL, 0.33 M) was added under an inert atmosphere. The vial was capped with a teflon pressure cap and placed into a pre-heated aluminum block at 80 °C. The reaction mixture was stirred for 10 h. After completion (judged by GC), cyclohexane was removed under reduced pressure and chromatographic separation with silica gel (chloroform as eluent) gave 144 mg of the borylated product (51%) as a white solid (mp = 106-107 °C).

$^1\text{H}$  NMR (500 MHz,  $\text{CDCl}_3$ ):  $\delta_{\text{H}}$  8.33 (d,  $J = 2.5$  Hz, 1H), 8.25 (s, 1H), 8.0 (dd,  $J = 9.0, 2.5$  Hz, 1H), 6.91 (d,  $J = 9.0$  Hz, 1H), 4.35 (q,  $J = 7.3$  Hz, 2H), 1.36 - 1.40 (m, Bpin 12H and ester 3H overlapped).

$^{13}\text{C}$  NMR (125 MHz,  $\text{CDCl}_3$ ):  $\delta_{\text{C}}$  167.3, 166.3, 138.1, 135.4, 122.1, 115.6, 84.9, 60.6, 24.8, 14.5;

$^{11}\text{B}$  NMR (160 MHz,  $\text{CDCl}_3$ ):  $\delta_{\text{B}}$  30.8 (br. s).

HRMS (ESI)  $m/z$  calcd for  $\text{C}_{15}\text{H}_{22}\text{BO}_5$   $[\text{M} + \text{H}]^+$  293.1563, found 293.1565.

**Borylation of 4-bromo-2-chlorophenol with B<sub>2</sub>pin<sub>2</sub> (1j):**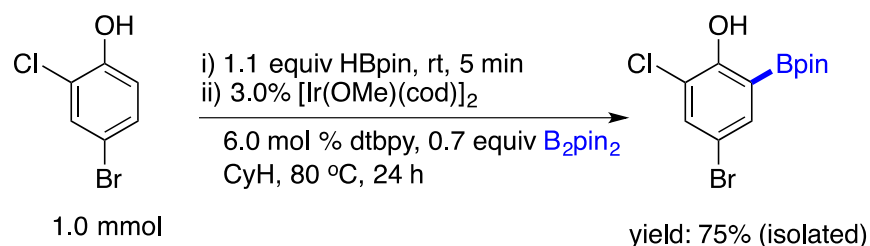

In a glovebox, a 5 mL conical vial was charged with 4-bromo-2-chlorophenol (207 mg, 1.0 mmol) and pinacolborane (160  $\mu$ L, 1.1 equiv) and stirred for 5 min at room temperature. To this mixture, [Ir(OMe)(cod)]<sub>2</sub> (20 mg, 3.0 mol %, 0.03 mmol), dtbpy (16 mg, 6.0 mol %, 0.06 mmol), and B<sub>2</sub>pin<sub>2</sub> (178 mg, 0.7 equiv) was charged. Dry cyclohexane (3 mL, 0.33 M) was added under an inert atmosphere. The vial was capped with a teflon pressure cap and placed into a pre-heated aluminum block at 80 °C. The reaction mixture was stirred for 24 h. After completion (judged by GC), cyclohexane was removed under reduced pressure and chromatographic separation with silica gel (chloroform as eluent) gave 250 mg of the borylated product (75%) as a brown solid (mp = 109-110 °C).

<sup>1</sup>H NMR (500 MHz, CDCl<sub>3</sub>):  $\delta_{\text{H}}$  8.28 (s, 1H), 7.62 (d,  $J = 2.4$  Hz, 1H), 7.57 (d,  $J = 2.4$  Hz, 1H), 1.38 (s, 12H).

<sup>13</sup>C NMR (125 MHz, CDCl<sub>3</sub>):  $\delta_{\text{C}}$  157.9, 136.3, 136.1, 121.8, 111.5, 85.4, 24.8.

<sup>11</sup>B NMR (160 MHz, CDCl<sub>3</sub>):  $\delta_{\text{B}}$  30.0

HRMS (ESI)  $m/z$  calcd for C<sub>12</sub>H<sub>14</sub>BBrClO<sub>3</sub> [M - H]<sup>-</sup> 330.9910, found 330.9910.

**Borylation of 2,4-dichlorophenol with B<sub>2</sub>pin<sub>2</sub> (1k):**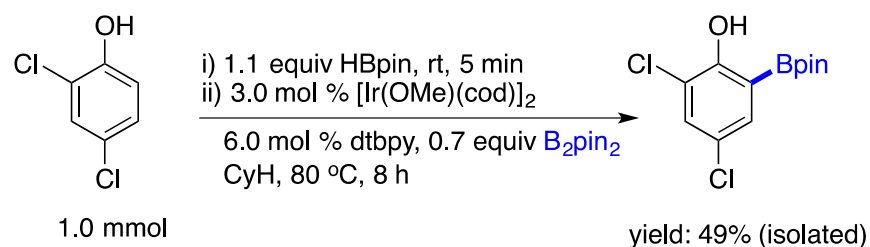

In a glovebox, a 5 mL conical vial was charged with 2,4-dichlorophenol (163 mg, 1.0 mmol) and pinacolborane (160  $\mu$ L, 1.1 equiv) and stirred for 5 min at room temperature. To this mixture, [Ir(OMe)(cod)]<sub>2</sub> (20 mg, 3.0 mol %, 0.03 mmol), dtbpy (16 mg, 6.0 mol %, 0.06 mmol), and B<sub>2</sub>pin<sub>2</sub> (178 mg, 0.7 equiv) was charged. Dry cyclohexane (3 mL, 0.33 M) was added under an inert atmosphere. The vial was capped with a teflon pressure cap and placed into a pre-heated aluminum

block at 80 °C. The reaction mixture was stirred for 8 h. After completion (judged by GC), cyclohexane was removed under reduced pressure and chromatographic separation with silica gel (chloroform as eluent) gave 141 mg of the borylated product (49%) as a yellow solid (mp = 108-109 °C).

$^1\text{H}$  NMR (500 MHz,  $\text{CDCl}_3$ ):  $\delta_{\text{H}}$  8.26 (s, 1H), 7.47 (d,  $J = 2.5$  Hz, 1H), 7.43 (d,  $J = 2.5$  Hz, 1H), 1.38 (s, 12H).

$^{13}\text{C}$  NMR (125 MHz,  $\text{CDCl}_3$ ):  $\delta_{\text{C}}$  162.3, 157.4, 133.4, 124.7, 121.5, 85.3, 24.8.

$^{11}\text{B}$  NMR (160 MHz,  $\text{CDCl}_3$ ):  $\delta_{\text{B}}$  31.1 (br. s).

HRMS (ESI)  $m/z$  calcd for  $\text{C}_{12}\text{H}_{14}\text{BCl}_2\text{O}_3$  [M - H] $^-$  287.0415, found 287.0418.

### Borylation of 3,4-dimethylphenol with $\text{B}_2\text{pin}_2$ (11):

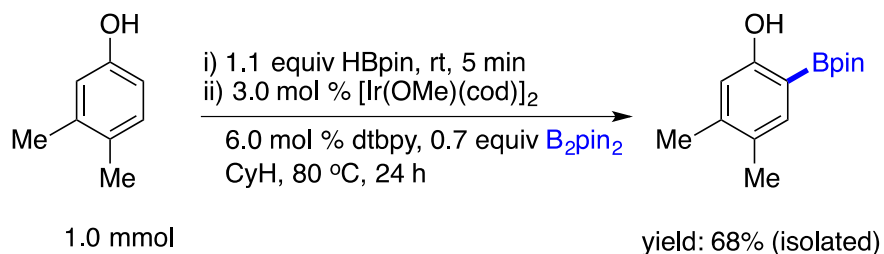

In a glovebox, a 5 mL conical vial was charged with 3,4-dimethylphenol (122 mg, 1.0 mmol) and pinacolborane (160  $\mu\text{L}$ , 1.1 equiv) and stirred for 5 min at room temperature. To this mixture,  $[\text{Ir}(\text{OMe})(\text{cod})]_2$  (20 mg, 3.0 mol %, 0.03 mmol), dtbpy (16 mg, 6.0 mol %, 0.06 mmol), and  $\text{B}_2\text{pin}_2$  (178 mg, 0.7 equiv) was charged. Dry cyclohexane (3 mL, 0.33 M) was added under an inert atmosphere. The vial was capped with a teflon pressure cap and placed into a pre-heated aluminum block at 80 °C. The reaction mixture was stirred for 24 h. After completion (judged by GC), cyclohexane was removed under reduced pressure and chromatographic separation with silica gel (chloroform as eluent) gave 169 mg of the borylated product (68%) as an oil.

$^1\text{H}$  NMR (500 MHz,  $\text{CDCl}_3$ ):  $\delta_{\text{H}}$  7.60 (s, 1H), 7.36 (s, 1H), 6.72 (s, 1H), 2.25 (s, 3H), 2.19 (s, 3H), 1.38 (s, 12H).

$^{13}\text{C}$  NMR (125 MHz,  $\text{CDCl}_3$ ):  $\delta_{\text{C}}$  161.9, 143.2, 136.0, 127.5, 116.5, 84.2, 24.8, 20.3, 18.5.

$^{11}\text{B}$  NMR (160 MHz,  $\text{CDCl}_3$ ):  $\delta_{\text{B}}$  30.8 (br. s).

HRMS (ESI)  $m/z$  calcd for  $\text{C}_{14}\text{H}_{20}\text{BO}_3$  [M - H] $^-$  247.1508, found 247.1509.

**Borylation of 4-chloro-3-methylphenol with B<sub>2</sub>pin<sub>2</sub> (1m):**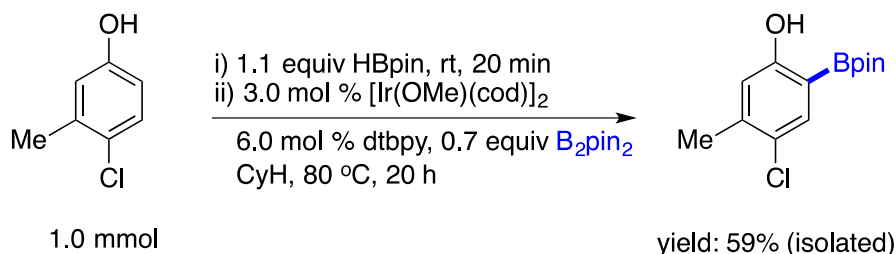

In a glovebox, a 5 mL conical vial was charged with 4-chloro-3-methylphenol (143 mg, 1.0 mmol) and pinacolborane (160  $\mu$ L, 1.1 equiv) and stirred for 20 min at room temperature. To this mixture, [Ir(OMe)(cod)]<sub>2</sub> (20 mg, 3.0 mol %, 0.03 mmol), dtbpy (16 mg, 6.0 mol %, 0.06 mmol), and B<sub>2</sub>pin<sub>2</sub> (178 mg, 0.7 equiv) was charged. Dry cyclohexane (3 mL, 0.33 M) was added under an inert atmosphere. The vial was capped with a teflon pressure cap and placed into a pre-heated aluminum block at 80 °C. The reaction mixture was stirred for 20 h. After completion (judged by GC), cyclohexane was removed under reduced pressure and chromatographic separation with silica gel (10% ethylacetate in hexane as eluent) gave 159 mg of the ortho-borylated product (59%) as a red liquid.

<sup>1</sup>H NMR (500 MHz, CDCl<sub>3</sub>):  $\delta_{\text{H}}$  7.67 (s, 1H), 7.54 (s, 1H), 6.78 (s, 1H), 2.34 (s, 3H), 1.37 (s, 12H).

<sup>13</sup>C NMR (125 MHz, CDCl<sub>3</sub>):  $\delta_{\text{C}}$  162.0, 142.0, 135.2, 125.1, 117.9, 84.7, 24.7, 20.6.

<sup>11</sup>B NMR (160 MHz, CDCl<sub>3</sub>):  $\delta_{\text{B}}$  30.5 (br. s).

HRMS (ESI) *m/z* calcd for C<sub>13</sub>H<sub>17</sub>BClO<sub>3</sub> [M - H]<sup>-</sup> 267.0962, found 267.0964.

**Borylation of 2-methoxy-4-methylphenol with B<sub>2</sub>pin<sub>2</sub> (1n):**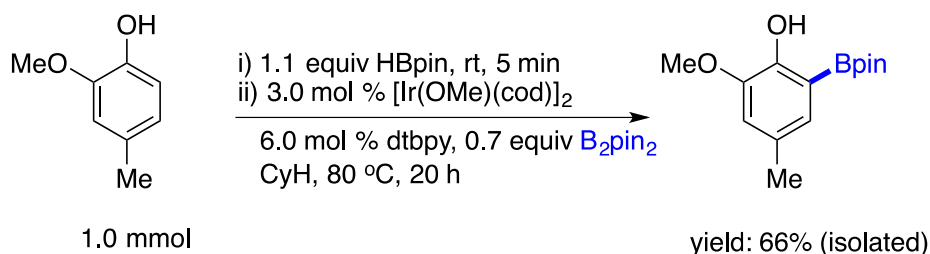

In a glovebox, a 5 mL conical vial was charged with 2-methoxy-4-methylphenol (138 mg, 1.0 mmol) and pinacolborane (160  $\mu$ L, 1.1 equiv) and stirred for 5 min at room temperature. To this mixture, [Ir(OMe)(cod)]<sub>2</sub> (20 mg, 3.0 mol %, 0.03 mmol), dtbpy (16 mg, 6.0 mol %, 0.06 mmol), and B<sub>2</sub>pin<sub>2</sub> (178 mg, 0.7 equiv) was charged. Dry cyclohexane (3 mL, 0.33 M) was added under an inert atmosphere. The vial was capped with a teflon pressure cap and placed into a pre-heated aluminum block at 80 °C. The reaction mixture was stirred for 20 h. After completion (judged by

GC), cyclohexane was removed under reduced pressure and chromatographic separation with silica gel (10% ethylacetate in hexane as eluent) gave 175 mg of the ortho-borylated product (66%) as a pale yellow oil.

$^1\text{H}$  NMR (500 MHz,  $\text{CDCl}_3$ ):  $\delta_{\text{H}}$  7.61 (s, 1H), 7.02 (d,  $J = 1.0$  Hz, 1H), 6.82 (d,  $J = 1.5$  Hz, 1H), 3.87 (s, 3H), 2.28 (s, 3H), 1.36 (s, 12H).

$^{13}\text{C}$  NMR (125 MHz,  $\text{CDCl}_3$ ):  $\delta_{\text{C}}$  150.8, 147.1, 129.0, 126.6, 116.7, 84.4, 56.0, 24.8, 20.8.

$^{11}\text{B}$  NMR (160 MHz,  $\text{CDCl}_3$ ):  $\delta_{\text{B}}$  30.5 (br. s).

HRMS (ESI)  $m/z$  calcd for  $\text{C}_{14}\text{H}_{22}\text{BO}_4$   $[\text{M} + \text{H}]^+$  265.1614, found 265.1603.

### Borylation of 3-carboethoxyphenol with $\text{B}_2\text{pin}_2$ (1o):

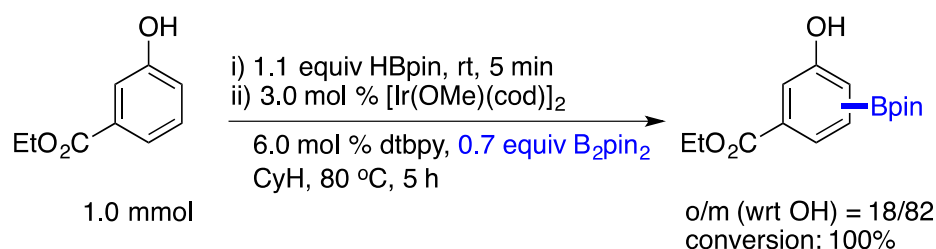

In a glovebox, a 5 mL conical vial was charged with 3-carboethoxyphenol (166 mg, 1.0 mmol) and pinacolborane (160  $\mu\text{L}$ , 1.1 equiv) and stirred for 5 min at room temperature. To this mixture,  $[\text{Ir}(\text{OMe})(\text{cod})]_2$  (20 mg, 3.0 mol %, 0.03 mmol), dtbpy (16 mg, 6.0 mol %, 0.06 mmol), and  $\text{B}_2\text{pin}_2$  (1.0 equiv) was charged. Dry cyclohexane (3 mL, 0.33 M) was added under an inert atmosphere. The vial was capped with a teflon pressure cap and placed into a pre-heated aluminum block at 80  $^\circ\text{C}$ . The reaction mixture was stirred for 5 h. GC-FID showed a 100% conversion of the starting material. The ratio of products was 18:82 (ortho:meta wrt OH).

### Borylation of ortho-cresol with $\text{B}_2\text{pin}_2$ (1p):

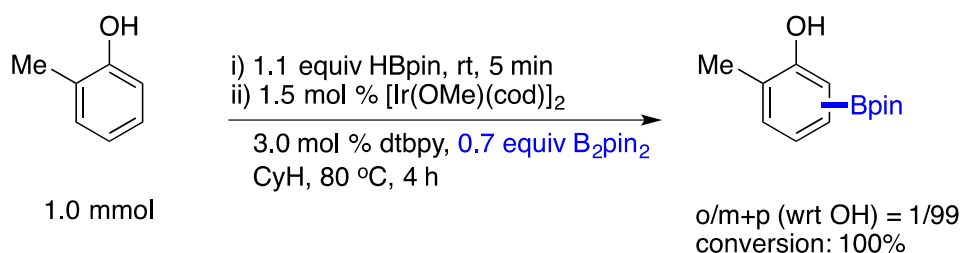

In a glovebox, a 5 mL conical vial was charged with ortho-cresol (108 mg, 1.0 mmol) and pinacolborane (160  $\mu\text{L}$ , 1.1 equiv) and stirred for 5 min at room temperature. To this mixture,  $[\text{Ir}(\text{OMe})(\text{cod})]_2$  (10 mg, 1.5 mol %, 0.015 mmol), dtbpy (8 mg, 3.0 mol %, 0.03 mmol), and  $\text{B}_2\text{pin}_2$  (178 mg, 0.7 equiv) was charged. Dry cyclohexane (3 mL, 0.33 M) was added under an inert

atmosphere. The vial was capped with a teflon pressure cap and placed into a pre-heated aluminum block at 80 °C. The reaction mixture was stirred for 4 h. GC-FID showed a 100% conversion of the starting material. The ratio of products was 1:99 (ortho:meta wrt OH).

#### Borylation of phenol with B<sub>2</sub>eg<sub>2</sub> (1q):

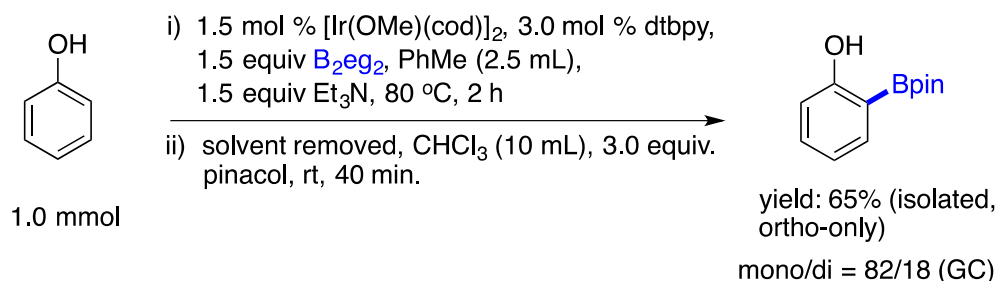

In a glovebox, a 5 mL conical vial was charged with [Ir(OMe)(cod)]<sub>2</sub> (10 mg, 1.5 mol %, 0.015 mmol), dtbpy (8 mg, 3.0 mol %, 0.03 mmol), B<sub>2</sub>eg<sub>2</sub> (213 mg, 1.5 equiv, 1.5 mmol), phenol (94 mg, 1.0 mmol), dry PhMe (2.5 mL) and Et<sub>3</sub>N (209 μL, 1.5 equiv, 1.5 mmol). The vial was capped with a teflon pressure cap and placed into a pre-heated aluminum block at 80 °C for 2 h. The solvent was evaporated under reduced pressure and dry chloroform (10 mL) was added. To this mixture, pinacol (354 mg, 3.0 equiv) was added and stirred at room temperature for 40 min. Upon completion (judged by GC), the crude mixture was passed through a short pad of silica gel (chloroform as eluent) to afford the 142 mg of the ortho-borylated product (65%) as a colorless oil. The ratio of mono/*o,o*-di borylated product was found to be 82/18 by the GC-FID and the diborylated product was assigned by the crude NMR spectra, but was not isolated. The NMR data were in accordance with the literature reported data.<sup>5</sup>

#### Borylation of 4-Fluorophenol with B<sub>2</sub>eg<sub>2</sub> (1r):

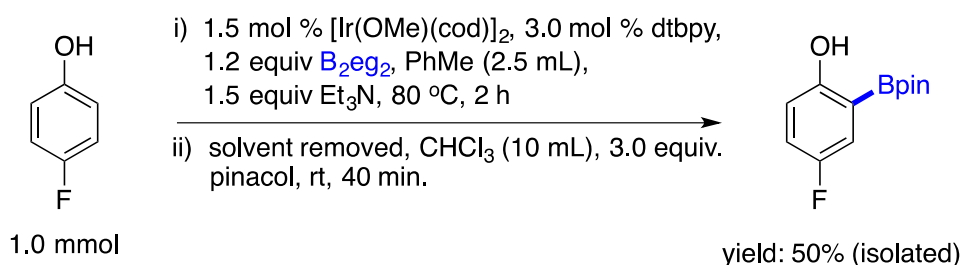

In a glovebox, a 5 mL conical vial was charged with [Ir(OMe)(cod)]<sub>2</sub> (10 mg, 1.5 mol %, 0.015 mmol), dtbpy (8 mg, 3.0 mol %, 0.03 mmol), B<sub>2</sub>eg<sub>2</sub> (170.07 mg, 1.2 equiv, 1.2 mmol), 4-fluorophenol (112 mg, 1.0 mmol), dry PhMe (2.5 mL) and Et<sub>3</sub>N (209 μL, 1.5 equiv, 1.5 mmol). The vial was capped with a teflon pressure cap and placed into a pre-heated aluminum block at 80

°C for 2 h. Solvent was evaporated under reduced pressure and dry chloroform (10 mL) was added. To this mixture, pinacol (354 mg, 3.0 equiv) was added and stirred at room temperature for 40 min. Upon completion (judged by GC), the crude mixture was passed through a short pad of silica gel (chloroform as eluent) to afford the 118 mg of the ortho-borylated product (50%) as a brown oil. The ratio of mono/*o,o*-di borylated product was found to be 89/11 by the GC-FID and the di-borylated product was assigned by the crude NMR spectra, but not isolated. The NMR data of the isolated product were in accordance with the literature reported data.<sup>5</sup>

<sup>1</sup>H NMR (500 MHz, CDCl<sub>3</sub>): δ<sub>H</sub> 7.65 (s, 1H), 7.25 - 7.27 (m, OH and ArH overlapped, 2H), 7.06 (dt, *J* = 8.5, 3.5 Hz, 1H), 6.83 (dd, *J* = 8.5, 3.5 Hz, 1H), 1.38 (s, 12H).

<sup>13</sup>C NMR (125 MHz, CDCl<sub>3</sub>): δ<sub>C</sub> 159.6 (d, *J* = 1.9 Hz), 156.3 (d, *J* = 237.6 Hz), 120.6 (d, *J* = 21.2 Hz), 120.4, 116.7 (d, *J* = 7.2 Hz), 84.8, 24.8.

<sup>11</sup>B NMR (160 MHz, CDCl<sub>3</sub>): δ<sub>B</sub> 30.4 (br. s).

<sup>19</sup>F NMR (470 MHz, CDCl<sub>3</sub>): δ<sub>F</sub> -126.0 (td, *J* = 21.5, 13.3, 5.1 Hz).

#### Borylation of 3-carboethoxyphenol with B<sub>2</sub>eg<sub>2</sub> (1s)

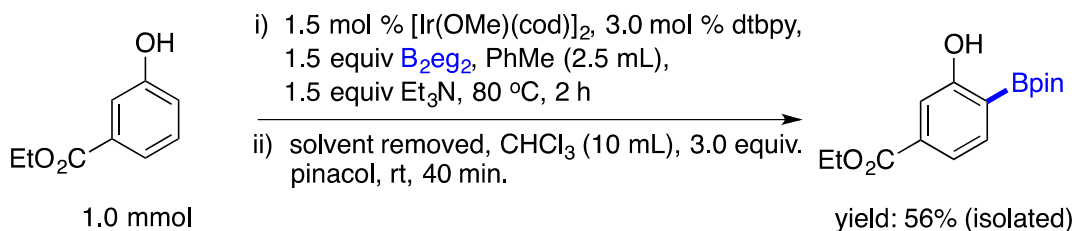

In a glovebox, a 5 mL conical vial was charged with [Ir(OMe)(cod)]<sub>2</sub> (10 mg, 1.5 mol %, 0.015 mmol), dtbpy (8 mg, 3.0 mol %, 0.03 mmol), B<sub>2</sub>eg<sub>2</sub> (213 mg, 1.5 equiv, 1.5 mmol), 3-carboethoxyphenol (166 mg, 1.0 mmol), dry PhMe (2.5 mL) and Et<sub>3</sub>N (209 μL, 1.5 equiv, 1.5 mmol). The vial was capped with a teflon pressure cap and placed into a pre-heated aluminum block at 80 °C for 2 h. Solvent was evaporated under reduced pressure and dry chloroform (10 mL) was added. To this mixture, pinacol (354 mg, 3.0 equiv) was added and stirred at room temperature for 40 min. Upon completion (judged by GC), the crude mixture was passed through a short pad of silica gel (chloroform as eluent) to afford the 163 mg of the ortho-borylated product (56%) as colorless oil. In this reaction, no di-borylation was observed.

<sup>1</sup>H NMR (500 MHz, CDCl<sub>3</sub>): δ<sub>H</sub> 7.89 (s, 1H), 7.67 (d, *J* = 8.0 Hz, 1H), 7.51 - 7.56 (m, 2H), 4.37 (q, *J* = 7.5 Hz, 2H), 1.38 - 1.41 (m, Bpin 12H and ester 3H overlapped, 15H).

<sup>13</sup>C NMR (125 MHz, CDCl<sub>3</sub>): δ<sub>C</sub> 166.3, 163.4, 135.7, 135.3, 120.2, 116.4, 84.9, 61.1, 24.8, 14.3.

$^{11}\text{B}$  NMR (160 MHz,  $\text{CDCl}_3$ ):  $\delta_{\text{B}}$  30.6 (br. s).

HRMS (ESI)  $m/z$  calcd for  $\text{C}_{15}\text{H}_{20}\text{BO}_5$   $[\text{M} - \text{H}]^-$  291.1407, found 291.1403.

### Borylation of ortho-cresol with $\text{B}_2\text{eg}_2$ (1t):

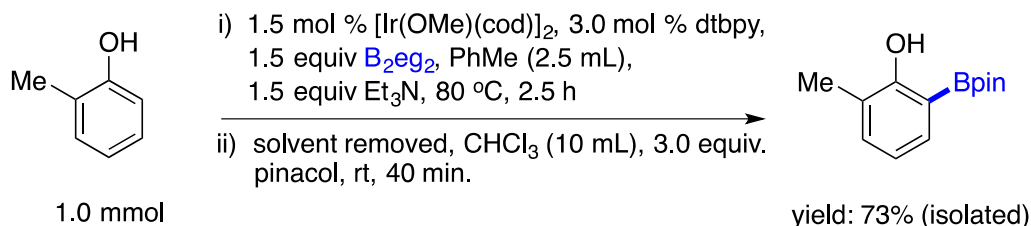

In a glovebox, a 5 mL conical vial was charged with  $[\text{Ir}(\text{OMe})(\text{cod})]_2$  (10 mg, 1.5 mol %, 0.015 mmol), dtbpy (8 mg, 3.0 mol %, 0.03 mmol),  $\text{B}_2\text{eg}_2$  (213 mg, 1.5 equiv, 1.5 mmol), *o*-cresol (108 mg, 1.0 mmol), dry PhMe (2.5 mL) and  $\text{Et}_3\text{N}$  (209  $\mu\text{L}$ , 1.5 equiv, 1.5 mmol). The vial was capped with a teflon pressure cap and placed into a pre-heated aluminum block at 80  $^\circ\text{C}$  for 2.5 h. Solvent was evaporated under reduced pressure and dry chloroform (10 mL) was added. To this mixture, pinacol (354 mg, 3.0 equiv) was added and stirred at room temperature for 40 min. Upon completion (judged by GC), the crude mixture was passed through a short plug of silica gel (chloroform as eluent) to afford the 172 mg of the ortho-borylated product (73%) as a solid (mp = 51-52  $^\circ\text{C}$ ). No di-borylation was found in this reaction.

$^1\text{H}$  NMR (500 MHz,  $\text{CDCl}_3$ ):  $\delta_{\text{H}}$  8.02 (s, 1H), 7.49 (dd,  $J = 7.5, 1.5$  Hz, 1H), 7.26 (dd,  $J = 7.5, 1.5$  Hz, 1H), 6.83 (t,  $J = 7.5$  Hz, 1H), 2.27 (s, 3H), 1.39 (s, 12H).

$^{13}\text{C}$  NMR (125 MHz,  $\text{CDCl}_3$ ):  $\delta_{\text{C}}$  161.8, 134.9, 133.2, 124.4, 119.4, 84.4, 24.8, 16.0.

$^{11}\text{B}$  NMR (160 MHz,  $\text{CDCl}_3$ ):  $\delta_{\text{B}}$  30.9 (br. s).

HRMS (ESI)  $m/z$  calcd for  $\text{C}_{13}\text{H}_{18}\text{BO}_3$   $[\text{M} - \text{H}]^-$  233.1351, found 233.1354.

### Borylation of 3-methoxyphenol with $\text{B}_2\text{eg}_2$ (1u):

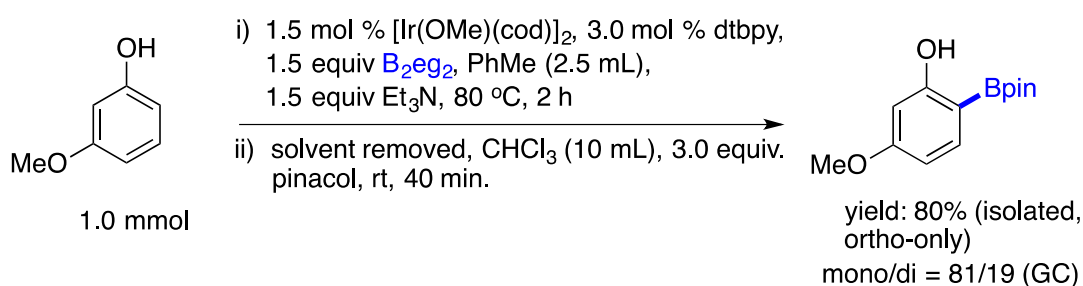

In a glovebox, a 5 mL conical vial was charged with  $[\text{Ir}(\text{OMe})(\text{cod})]_2$  (10 mg, 1.5 mol %, 0.015 mmol), dtbpy (8 mg, 3.0 mol %, 0.03 mmol),  $\text{B}_2\text{eg}_2$  (213 mg, 1.5 equiv, 1.5 mmol), 3-methoxyphenol (124 mg, 1.0 mmol), dry PhMe (2.5 mL) and  $\text{Et}_3\text{N}$  (209  $\mu\text{L}$ , 1.5 equiv, 1.5 mmol).



The vial was capped with a teflon pressure cap and placed into a pre-heated aluminum block at 80 °C for 2 h. Solvent was evaporated under reduced pressure and dry chloroform (10 mL) was added. To this mixture, pinacol (354 mg, 3.0 equiv) was added and stirred at room temperature for 40 min. Upon completion (judged by GC), the crude mixture was passed through a short pad of silica gel (chloroform as eluent) to afford 199 mg of the ortho-borylated product (80%) as a colorless oil. The ratio of mono/*o,o*-di borylated product was found to be 81/19 by the GC-FID and the di-borylated product was assigned by the crude NMR spectra, but it was not isolated.

$^1\text{H}$  NMR (500 MHz,  $\text{CDCl}_3$ ):  $\delta_{\text{H}}$  7.91 (s, 1H), 7.52 (d,  $J = 8.5$  Hz, 1H), 6.48 (dd,  $J = 8.5, 2.5$  Hz, 1H), 6.43 (d,  $J = 2.5$  Hz, 1H), 3.81 (s, 3H), 1.37 (s, 12H).

$^{13}\text{C}$  NMR (125 MHz,  $\text{CDCl}_3$ ):  $\delta_{\text{C}}$  165.5, 164.5, 136.8, 107.0, 100.1, 84.2, 55.2, 24.8.

$^{11}\text{B}$  NMR (160 MHz,  $\text{CDCl}_3$ ):  $\delta_{\text{B}}$  30.8 (br. s).

HRMS (ESI)  $m/z$  calcd for  $\text{C}_{13}\text{H}_{18}\text{BO}_4$   $[\text{M} - \text{H}]^-$  249.1301, found 249.1303.

#### Borylation of 3-chlorophenol with $\text{B}_2\text{eg}_2$ (**1v**):

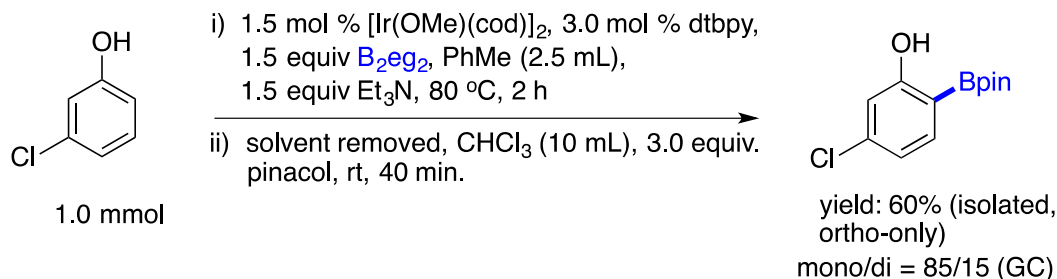

In a glovebox, a 5 mL conical vial was charged with  $[\text{Ir}(\text{OMe})(\text{cod})]_2$  (10 mg, 1.5 mol %, 0.015 mmol), dtbpy (8 mg, 3.0 mol %, 0.03 mmol),  $\text{B}_2\text{eg}_2$  (213 mg, 1.5 equiv, 1.5 mmol), 3-chlorophenol (129 mg, 1.0 mmol), dry PhMe (2.5 mL) and  $\text{Et}_3\text{N}$  (209  $\mu\text{L}$ , 1.5 equiv, 1.5 mmol). The vial was capped with a teflon pressure cap and placed into a pre-heated aluminum block at 80 °C for 2 h. Solvent was evaporated under reduced pressure and dry chloroform (10 mL) was added. To this mixture, pinacol (354 mg, 3.0 equiv) was added and stirred at room temperature for 40 min. Upon completion (judged by GC), the crude mixture was passed through a short pad of silica gel (chloroform as eluent) to afford 199 mg of the ortho-borylated product (60%) as a white solid (mp = 62-63 °C). The ratio of mono/*o,o*-di borylated product was found to be 85/15 by the GC-FID and the di-borylated product was assigned by the crude NMR spectra, but was not isolated.

$^1\text{H}$  NMR (500 MHz,  $\text{CDCl}_3$ ):  $\delta_{\text{H}}$  7.92 (s, 1H), 7.53 (d,  $J = 8.5$  Hz, 1H), 6.91 (d,  $J = 1.5$  Hz, 1H), 6.88 (dd,  $J = 8.5, 1.5$  Hz, 1H), 1.38 (s, 12H).

$^{13}\text{C}$  NMR (125 MHz,  $\text{CDCl}_3$ ):  $\delta_{\text{C}}$  164.3, 139.4, 136.6, 120.1, 115.9, 84.7, 24.8.

$^{11}\text{B}$  NMR (160 MHz,  $\text{CDCl}_3$ ):  $\delta_{\text{B}}$  30.6 (br. s).

HRMS (ESI)  $m/z$  calcd for  $\text{C}_{12}\text{H}_{15}\text{BClO}_3$  [ $\text{M} - \text{H}$ ] $^-$  253.0805, found 253.0808.

### Borylation of 2-methoxyphenol with $\text{B}_2\text{eg}_2$ (**1w**):

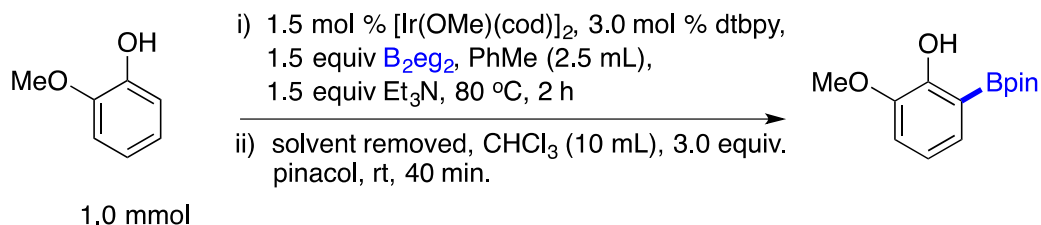

In a glovebox, a 5 mL conical vial was charged with  $[\text{Ir}(\text{OMe})(\text{cod})]_2$  (10 mg, 1.5 mol %, 0.015 mmol), dtbpy (8 mg, 3.0 mol %, 0.03 mmol),  $\text{B}_2\text{eg}_2$  (213 mg, 1.5 equiv, 1.5 mmol), 2-methoxyphenol (124 mg, 1.0 mmol), dry PhMe (2.5 mL) and  $\text{Et}_3\text{N}$  (209  $\mu\text{L}$ , 1.5 equiv, 1.5 mmol). The vial was capped with a teflon pressure cap and placed into a pre-heated aluminum block at 80  $^\circ\text{C}$  for 2 h. Solvent was evaporated under reduced pressure and dry chloroform (10 mL) was added. To this mixture, pinacol (354 mg, 3.0 equiv) was added and stirred at room temperature for 40 min. Upon completion (judged by GC), the crude mixture was purified by passing it through a short pad of silica gel (chloroform as eluent) followed by kugelrohr distillation (20 mm Hg/ 100  $^\circ\text{C}$ ) to afford 183 mg of the ortho-borylated product (73%). NMR data of the isolated product were in accordance with the literature reported data.<sup>8</sup>

### Borylation of 2-naphthol with $\text{B}_2\text{eg}_2$ (**1x**):

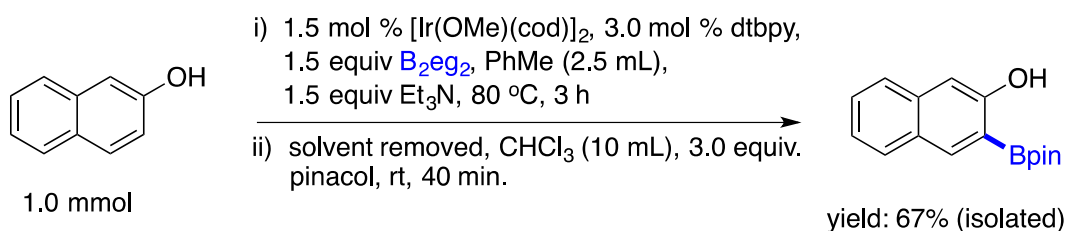

In a glovebox, a 5 mL conical vial was charged with  $[\text{Ir}(\text{OMe})(\text{cod})]_2$  (10 mg, 1.5 mol %, 0.015 mmol), dtbpy (8 mg, 3.0 mol %, 0.03 mmol),  $\text{B}_2\text{eg}_2$  (213 mg, 1.5 equiv, 1.5 mmol), 2-naphthol (144 mg, 1.0 mmol), dry PhMe (2.5 mL) and  $\text{Et}_3\text{N}$  (209  $\mu\text{L}$ , 1.5 equiv, 1.5 mmol). The vial was capped with a teflon pressure cap and placed into a pre-heated aluminum block at 80  $^\circ\text{C}$  for 3 h. Solvent was evaporated under reduced pressure and dry chloroform (10 mL) was added. To this mixture, pinacol (354 mg, 3.0 equiv) was added and stirred at room temperature for 40 min. Upon completion (judged by GC), the crude mixture was passed through a short pad of silica gel

(chloroform as eluent) to afford the 181 mg of the ortho-borylated product (67%) as a colorless oil. The NMR data were in accordance with the literature reported data.<sup>8</sup>

<sup>1</sup>H NMR (500 MHz, CDCl<sub>3</sub>): δ<sub>H</sub> 8.27 (s, 1H) 7.79 - 7.81 (m, OH and ArH overlapped, 2H), 7.70 (d, *J* = 8.5 Hz, 1H), 7.46 (dt, *J* = 7.5, 1.0 Hz, 1H), 7.30 (dt, *J* = 7.5, 1.0 Hz, 1H), 1.44 (s, 12H).

<sup>13</sup>C NMR (125 MHz, CDCl<sub>3</sub>): δ<sub>C</sub> 159.2, 138.2, 137.3, 128.6, 128.0, 127.8, 126.4, 123.2, 109.4, 84.8, 24.9.

<sup>11</sup>B NMR (160 MHz, CDCl<sub>3</sub>): δ<sub>B</sub> 30.7 (br. s).

**Evidence for 2-(4-fluorophenoxy)-1,3,2-dioxaborolanephensols formation under the reaction conditions:**

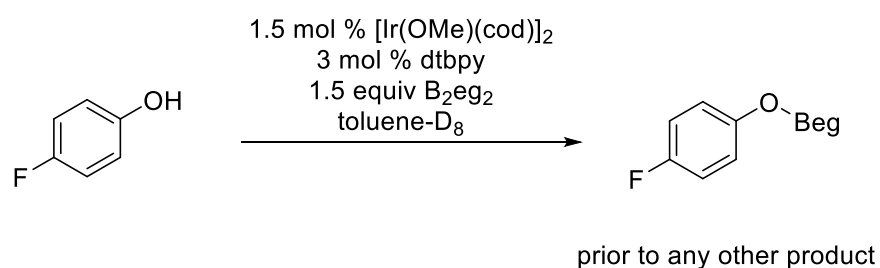

*Experimental:* In a glove, [Ir(OMe)(cod)]<sub>2</sub> (0.001g, 1.5 mol %) was dissolved in 0.05 mL deuterated toluene, B<sub>2</sub>eg<sub>2</sub> (0.021g, 0.15mmol, 1.5 equiv) was dissolved in 0.4 mL deuterated toluene, dtbpy (0.0008 g, 3 mol %) was dissolved in 0.05 mL, and 4-fluorophenol (0.0112 g, 0.1 mmol, 1 equiv) was dissolved in 0.2 mL deuterated toluene. The [Ir(OMe)(cod)]<sub>2</sub>, B<sub>2</sub>eg<sub>2</sub>, and dtbpy solutions were transferred to a J-Young tube and C<sub>6</sub>F<sub>6</sub> (3 μL) was added as a reference. The 4-fluorophenol was sealed in an air tight flask with a septa. The NMR tube was taken to a spectrometer and the 4-fluorophenol was injected into the NMR tube. The tube was inverted once for mixing and inserted into the spectrometer. <sup>19</sup>F NMR was collected. The time between addition of the phenol and the last scan for the <sup>19</sup>F NMR was ~2 minutes. The only observable product in <sup>19</sup>F NMR was the 2-(4-fluorophenoxy)-1,3,2-dioxaborolane which is shown below.

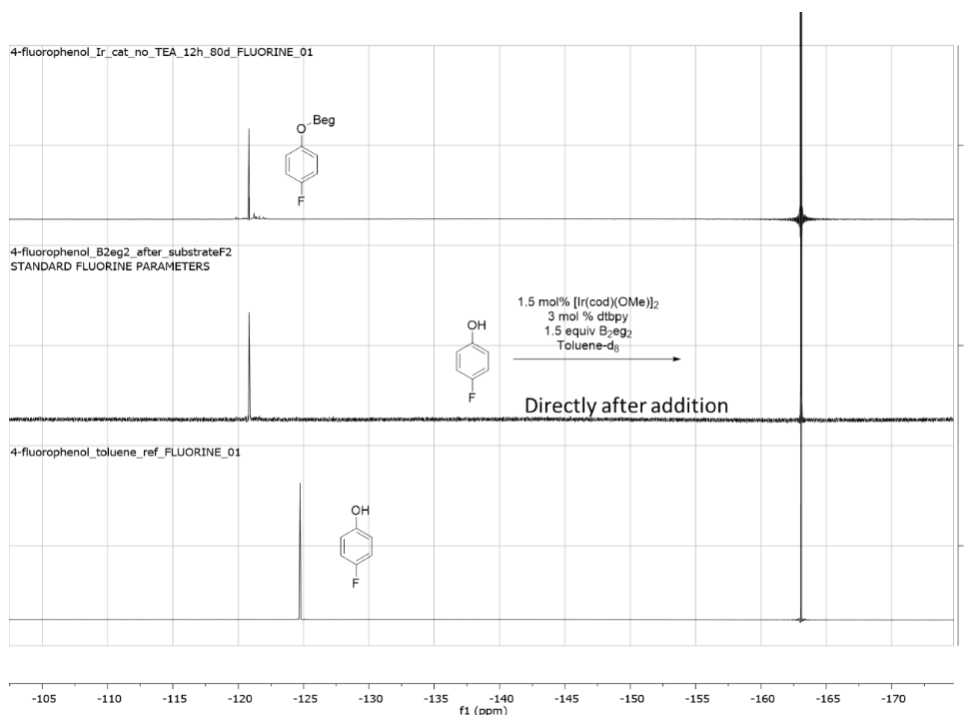

### Control for effects of toluene on borylation selectivity:

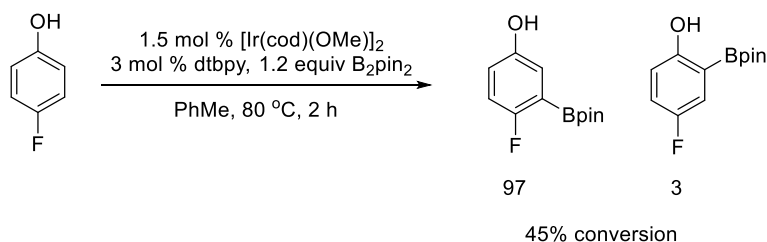

In a glovebox, a 3 mL conical vial was charged with  $[\text{Ir}(\text{OMe})(\text{cod})]_2$  (10 mg, 1.5 mol %, 0.015 mmol), dtbpy (8 mg, 3.0 mol %, 0.03 mmol),  $\text{B}_2\text{pin}_2$  (304.7 mg, 1.2 equiv, 1.2 mmol), 4-fluorophenol (112 mg, 1.0 mmol), and dry PhMe (2.5 mL). The vial was capped with a teflon pressure cap and placed into a pre-heated aluminum block at 80 °C for 2 h. Solvent was evaporated under reduced pressure and crude  $^{19}\text{F}$ ,  $^1\text{H}$ ,  $^{11}\text{B}$  NMR were recorded. The ratio of products, 97:3 m:o (with respect to OH), and conversion, 45%, was judged based on integration of  $^{19}\text{F}$  NMR.

### Control for effects of toluene and triethylamine on borylation selectivity:

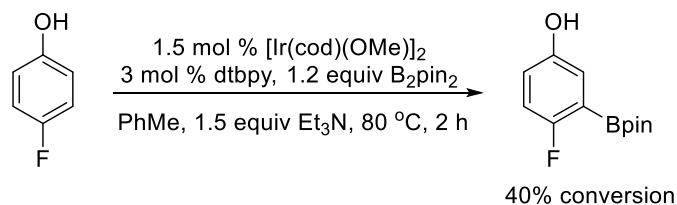

In a glovebox, a 3 mL conical vial was charged with  $[\text{Ir}(\text{OMe})(\text{cod})]_2$  (10 mg, 1.5 mol %, 0.015 mmol), dtbpy (8 mg, 3.0 mol %, 0.03 mmol),  $\text{B}_2\text{pin}_2$  (304.7 mg, 1.2 equiv, 1.2 mmol), 4-fluorophenol (112 mg, 1.0 mmol), dry PhMe (2.5 mL) and  $\text{Et}_3\text{N}$  (0.209 mL, 1.5 equiv, 1.5 mmol). The vial was capped with a teflon pressure cap and placed into a pre-heated aluminum block at 80 °C for 2 h. Solvent was evaporated under reduced pressure and crude  $^{19}\text{F}$ ,  $^1\text{H}$ ,  $^{11}\text{B}$  NMR were recorded. The conversion, 45%, was judged based on integration of  $^{19}\text{F}$  NMR. It should be noted that no borylation ortho to OH was detected.

#### Example of effects of triethylamine on $\text{B}_2\text{eg}_2$ reaction:

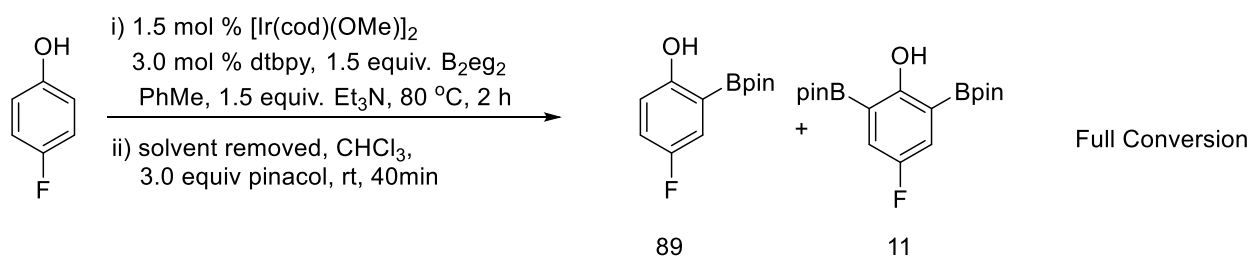

In a glovebox, a 3 mL conical vial was charged with  $[\text{Ir}(\text{OMe})(\text{cod})]_2$  (10 mg, 1.5 mol %, 0.015 mmol), dtbpy (8 mg, 3.0 mol %, 0.03 mmol),  $\text{B}_2\text{eg}_2$  (212 mg, 1.5 equiv, 1.5 mmol), 4-fluorophenol (112 mg, 1.0 mmol), dry PhMe (2.5 mL) and  $\text{Et}_3\text{N}$  (0.209 mL, 1.5 equiv, 1.5 mmol). The vial was capped with a teflon pressure cap and placed into a pre-heated aluminum block at 80 °C for 2 h. Solvent was evaporated under reduced pressure and dry chloroform (10 mL) was added. To this mixture, pinacol (354 mg, 3.0 equiv) was added and stirred at room temperature for 40 min after which crude  $^{19}\text{F}$  NMR was collected. The spectra showed full conversion and a 89:11 monoborylation:diborylation ratio.

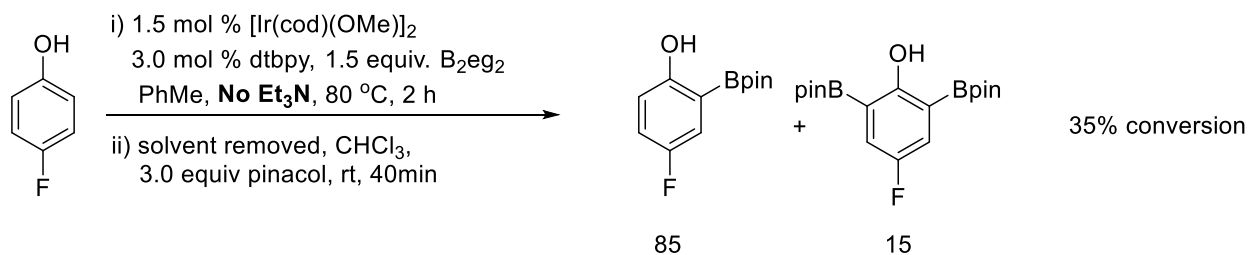

In a glovebox, a 3 mL conical vial was charged with  $[\text{Ir}(\text{OMe})(\text{cod})]_2$  (10 mg, 1.5 mol %, 0.015 mmol), dtbpy (8 mg, 3.0 mol %, 0.03 mmol),  $\text{B}_2\text{eg}_2$  (212 mg, 1.5 equiv, 1.5 mmol), 4-fluorophenol (112 mg, 1.0 mmol) and dry PhMe (2.5 mL). The vial was capped with a teflon pressure cap and placed into a pre-heated aluminum block at 80 °C for 2 h. Solvent was evaporated under reduced pressure and dry chloroform (10 mL) was added. To this mixture,

pinacol (354 mg, 3.0 equiv) was added and stirred at room temperature for 40 min after which crude  $^{19}\text{F}$  NMR was collected. The spectra showed 35% conversion and a 85:15 monoborylation:diborylation ratio.

**Synthesis of 2-(4-fluorophenoxy)-4,4,5,5-tetramethyl-1,3,2-dioxaborolane from 4-fluorophenol and the isolated trisboryl Ir catalyst:**

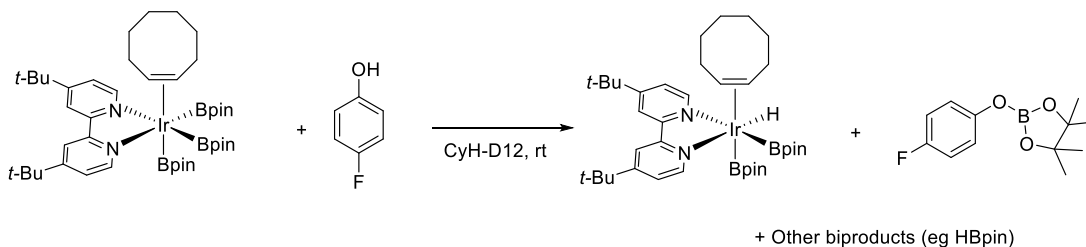

*Experimental:* In a glove, isolated trisboryl catalyst (0.0022g, 1 equiv) was dissolved in 0.4 mL deuterated cyclohexane and 4-fluorophenol (0.0003g, 1 equiv) was dissolved in 0.3 mL deuterated cyclohexane. The isolated trisboryl catalyst and 4-fluorophenol solutions were transferred into a J-Young tube and one drop of  $\text{C}_6\text{F}_6$  was added as a reference. The tube was sealed with a J-Young valve and  $^{19}\text{F}$ ,  $^{11}\text{B}$ ,  $^1\text{H}$  NMR were collected.

*Analysis:* Observed in the proton NMR, as shown below, is an iridium hydride species at -4.61 and the methyl groups on the Bpin of the phenol. The fluorine NMR shows the correct chemical shift at -121.8 ppm. Finally, the boron NMR showed the correct shift for the  $\text{ArOBpin}$  species at 21.7 ppm. Overall, this clearly demonstrates  $\text{ArOB(OR)}_2$  species can form from the iridium trisboryl catalyst.

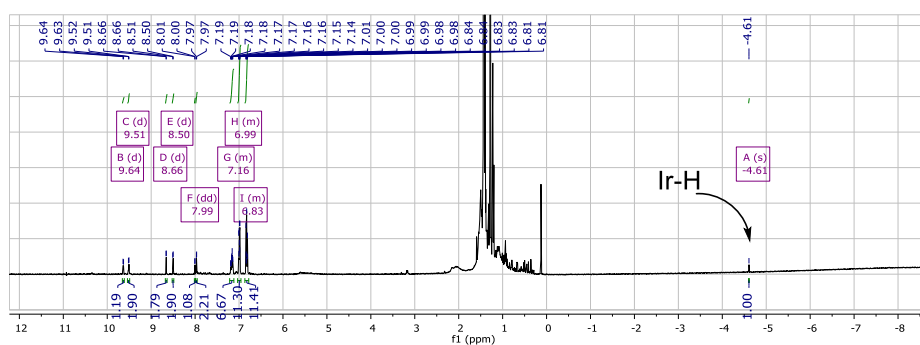

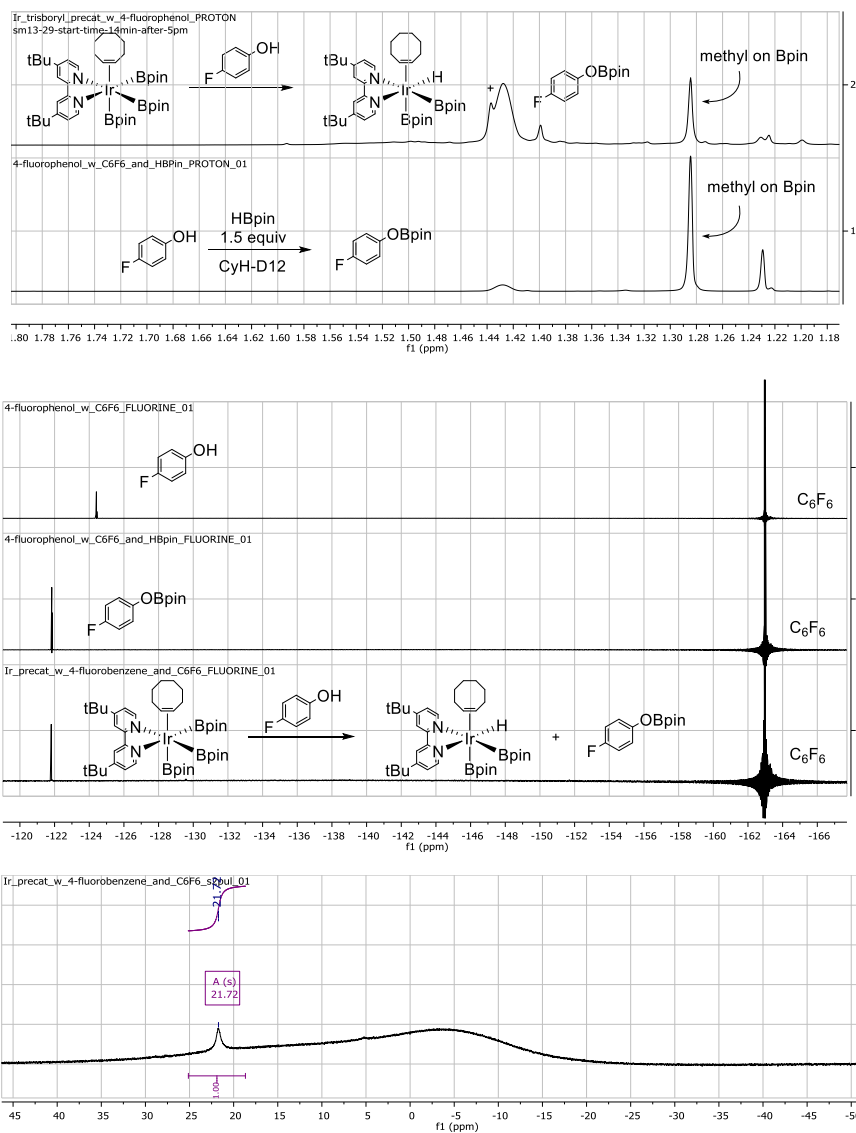

### Borylation of phenol with Ligand **4a**:

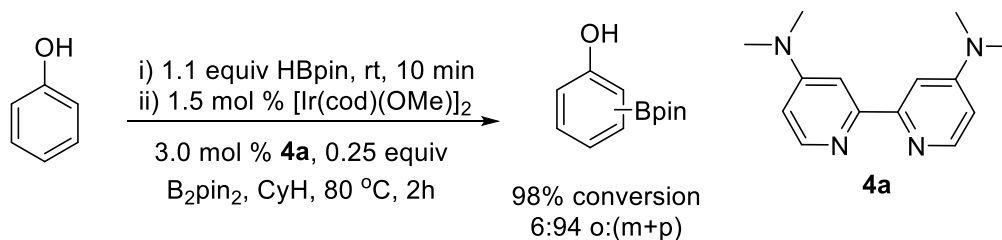

In a glovebox, a 5 mL conical vial was charged with phenol (188 mg, 2.0 mmol, 1.0 equiv) and pinacolborane (0.320 mL, 282 mg, 2.2 mmol, 1.1 equiv) and stirred for 5 min at room temperature. To this mixture, [Ir(OMe)(cod)]<sub>2</sub> (20 mg, 0.03 mmol, 1.5 mol %), 4,4'-Bis(N,N-dimethylamino)-2,2'-bipyridine (**4a**) (14.5 mg, 0.06 mmol, 3.0 mol %), and B<sub>2</sub>pin<sub>2</sub> (127 mg, 0.5 mmol, 0.25 equiv)

was charged. Dry cyclohexane (3 mL, 0.66 M) was added under an inert atmosphere. The vial was capped with a teflon pressure cap and placed into a pre-heated aluminum block at 80 °C. The reaction mixture was stirred for 2 h. GC-FID showed 98% conversion (based on B<sub>2</sub>pin<sub>2</sub>). The ratio of products was 6:94 of o:(m+p) and 98:2 monoborylation:diborylation.

#### Borylation of phenol with Ligand **4b**:

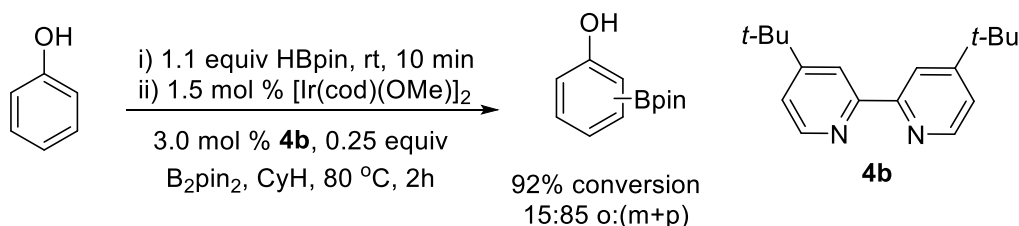

In a glovebox, a 5 mL conical vial was charged with phenol (188 mg, 2.0 mmol, 1.0 equiv) and pinacolborane (0.320 mL, 282 mg, 2.2 mmol, 1.1 equiv) and stirred for 5 min at room temperature. To this mixture, [Ir(OMe)(cod)]<sub>2</sub> (20 mg, 0.03 mmol, 1.5 mol %), dtbpy (**4b**) (16.1 mg, 0.06 mmol, 3.0 mol %), and B<sub>2</sub>pin<sub>2</sub> (127 mg, 0.5 mmol, 0.25 equiv) was charged. Dry cyclohexane (3 mL, 0.66 M) was added under an inert atmosphere. The vial was capped with a teflon pressure cap and placed into a pre-heated aluminum block at 80 °C. The reaction mixture was stirred for 2 h. GC-FID showed 92% conversion (based on B<sub>2</sub>pin<sub>2</sub>). The ratio of products was 15:85 of o:(m+p) and 98:2 monoborylation:diborylation.

#### Borylation of phenol with Ligand **4c**:

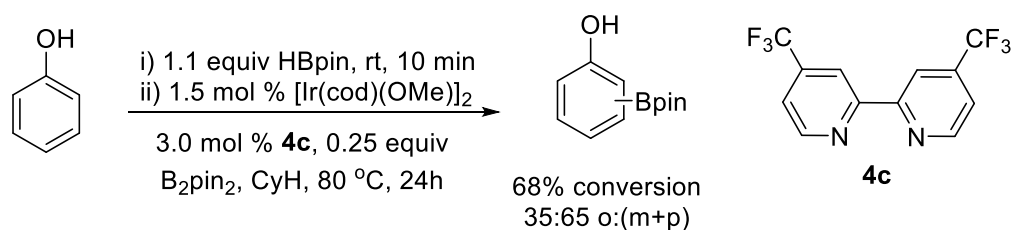

In a glovebox, a 5 mL conical vial was charged with phenol (188 mg, 2.0 mmol, 1.0 equiv) and pinacolborane (0.320 mL, 282 mg, 2.2 mmol, 1.1 equiv) and stirred for 5 min at room temperature. To this mixture, [Ir(OMe)(cod)]<sub>2</sub> (20 mg, 0.03 mmol, 1.5 mol %), 4,4'-bis(trifluoromethyl)-2,2'-bipyridine (**4c**) (17.5 mg, 0.06 mmol, 3.0 mol %), and B<sub>2</sub>pin<sub>2</sub> (127 mg, 0.5 mmol, 0.25 equiv) was charged. Dry cyclohexane (3 mL, 0.66 M) was added under an inert atmosphere. The vial was capped with a teflon pressure cap and placed into a pre-heated aluminum block at 80 °C. The reaction mixture was stirred for 24 h. GC-FID showed 68% conversion (based on B<sub>2</sub>pin<sub>2</sub>). The ratio of products was 35:65 of o:(m+p).



### Borylation of phenol with Ligand **4d**:

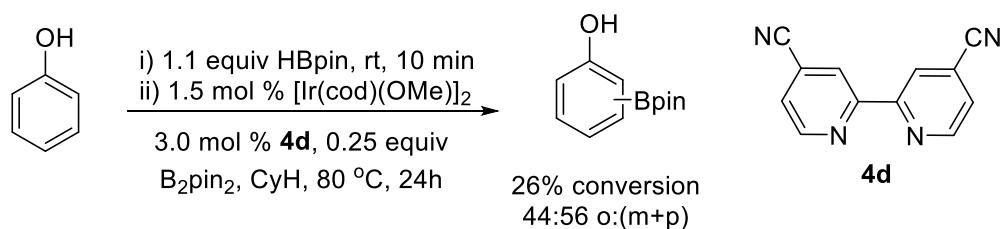

In a glovebox, a 5 mL conical vial was charged with phenol (94.1 mg, 1.0 mmol, 1.0 equiv) and pinacolborane (0.160 mL, 141 mg, 1.1 mmol, 1.1 equiv) and stirred for 5 min at room temperature. To this mixture, [Ir(OMe)(cod)]<sub>2</sub> (10 mg, 0.015 mmol, 1.5 mol %), [2,2'-bipyridine]-4,4'-dicarbonitrile (**4d**) (6.2 mg, 0.03 mmol, 3.0 mol %), and B<sub>2</sub>pin<sub>2</sub> (63.5 mg, 0.25 mmol, 0.25 equiv) was charged. Dry cyclohexane (3 mL, 0.33 M) was added under an inert atmosphere. The vial was capped with a teflon pressure cap and placed into a pre-heated aluminum block at 80 °C. The reaction mixture was stirred for 24 h. GC-FID showed 26% conversion (based on B<sub>2</sub>pin<sub>2</sub>). The ratio of products was 44:56 of o:(m+p).

#### Analysis:

Below is a chart summing up the data and the equation used to calculate the energy. This data was graphed and a strong linear correlation was observed.

| R group          | Hammett Value | ortho | meta+para | Energy at 80 (kcal/mol) |
|------------------|---------------|-------|-----------|-------------------------|
| NMe <sub>2</sub> | -0.83         | 6     | 94        | 1.93086827              |
| tBu              | -0.2          | 15    | 85        | 1.217242651             |
| CF <sub>3</sub>  | 0.54          | 35    | 65        | 0.434405897             |
| CN               | 0.66          | 44    | 55        | 0.156589232             |

$$E = -RT \ln \left( \frac{o}{m+p} \right)$$

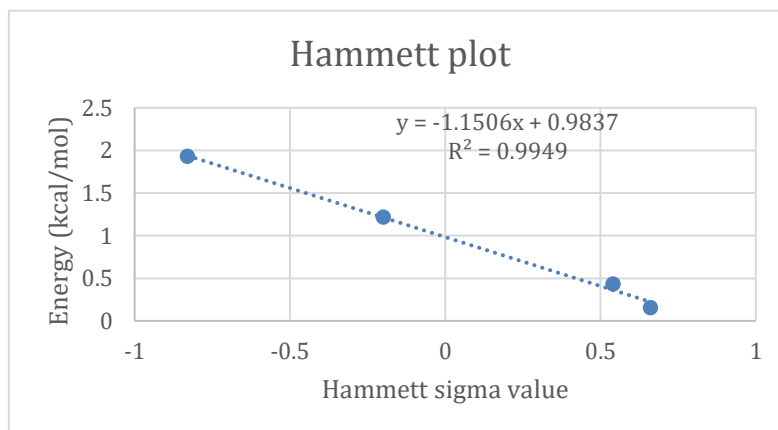

### 2-(4-fluorophenoxy)-1,3,2-dioxaborolane from 4-fluorophenol following Route B:

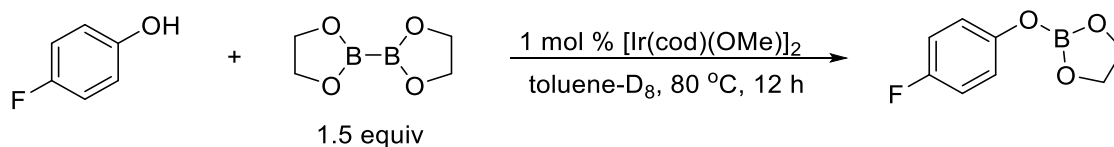

In a glove, [Ir(OMe)(cod)]<sub>2</sub> (0.0006g, 1 mol %) was dissolved in 0.05 mL deuterated toluene, 4-fluorophenol (0.0112g, 0.1 mmol, 1 equiv) was dissolved in 0.3 mL deuterated toluene, and B<sub>2</sub>eg<sub>2</sub> (0.0141g, 0.1mmol, 1 equiv) was dissolved in 0.35 mL deuterated toluene then these three solutions were transferred to a J-Young tube and C<sub>6</sub>F<sub>6</sub> (3 μL) was added as a reference. The tube was sealed with a J-Young valve the J-Young tube was then heated at 80 °C for 12 hours. After ~30 minutes the solution turned from a yellow to a black color and black sediment was observed. After heating <sup>19</sup>F, <sup>11</sup>B, <sup>1</sup>H NMR were collected. It should be noted that this compound was not isolated. Further evidence that this reaction produces the ArOBeg species can be found in the experiments with 2-fluorophenol.

<sup>1</sup>H NMR (500 MHz, toluene-D<sub>8</sub>): δ<sub>H</sub> 6.79-6.84 (m, 2H), 6.57-6.63 (m, 2H), 3.83 (s)

<sup>11</sup>B NMR (176 MHz, toluene-D<sub>8</sub>): δ<sub>B</sub> 22.6 (s).

<sup>19</sup>F NMR (470 MHz, toluene-D<sub>8</sub>): δ<sub>F</sub> -120.80 (m)

### 2-(2-fluorophenoxy)-1,3,2-dioxaborolane from 2-fluorophenol Route A:

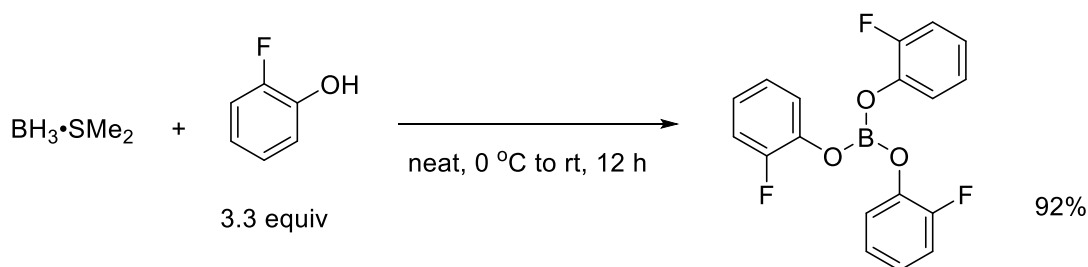

This procedure was adapted from a previous reported procedure<sup>9</sup>. To a flask under argon was added borane dimethylsulfide (1 mL, 10.5 mmol, 1 equiv). The flask was in an ice bath, connected to a bubbler, and 2-fluorophenol (3.1 mL, 34.7 mmol, 3.3 equiv) was added slowly. The reaction was allowed to warm to room temperature and stirred for 12 hours after which the dimethyl sulfide was distilled off via a short-path distillation head. After the distillation, the product was a solid that still contained 2-fluorophenol. To remove the excess 2-fluorophenol, the

product was heated to 100 °C and exposed to vacuum (0.1 mBar). At this temperature, the product liquefies. After cooling, back to room temperature, the product was obtained in 92% yield (3.36 g).

$^1\text{H}$  NMR (500 MHz,  $\text{CDCl}_3$ ):  $\delta_{\text{H}}$  7.26-7.30 (m, 1H), 7.16-7.20 (m, 1H), 7.07-7.14 (m, 2H)

$^{13}\text{C}$  NMR (125 MHz,  $\text{CDCl}_3$ ):  $\delta_{\text{C}}$  154.56, 152.60, 140.61, 140.52, 124.81 – 124.65 (m), 124.47 – 124.32 (m), 122.38, 116.53, 116.39

$^{11}\text{B}$  NMR (176 MHz,  $\text{CDCl}_3$ ):  $\delta_{\text{B}}$  16.47 (s).

$^{19}\text{F}$  NMR (470 MHz,  $\text{CDCl}_3$ ):  $\delta_{\text{F}}$  -132.27 (m)

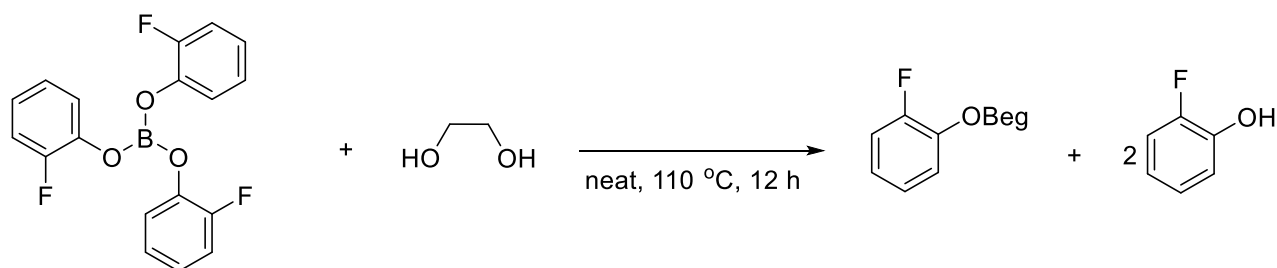

In a flask under argon was charged tris(2-fluorophenyl) borate (2.75 g, 8 mmol, 1 equiv) and ethylene glycol (0.497 g, 8 mmol, 1 equiv). The reaction mixture was heated to 110 °C in an oil bath and stirred under argon for 12 hours. The mixture was then distilled under vacuum to remove excess 2-fluorophenol. The resulting product was a yellow oil which was pure by  $^{19}\text{F}$  NMR and  $^{11}\text{B}$  NMR. However, the product contained extra glycol peaks in the  $^1\text{H}$  NMR and could not be fully purified in our hands. The spectra are shown below.

$^1\text{H}$  NMR (500 MHz,  $\text{CDCl}_3$ ):  $\delta_{\text{H}}$  7.15-7.19 (m, 1H), 7.09-7.13 (m, 1H), 7.04-7.07 (m, 2H), 4.33 (s, 4H)

$^{11}\text{B}$  NMR (176 MHz,  $\text{CDCl}_3$ ):  $\delta_{\text{B}}$  22.88 (s).

$^{19}\text{F}$  NMR (470 MHz,  $\text{CDCl}_3$ ):  $\delta_{\text{F}}$  -132.62 (m)

$^1\text{H}$  NMR

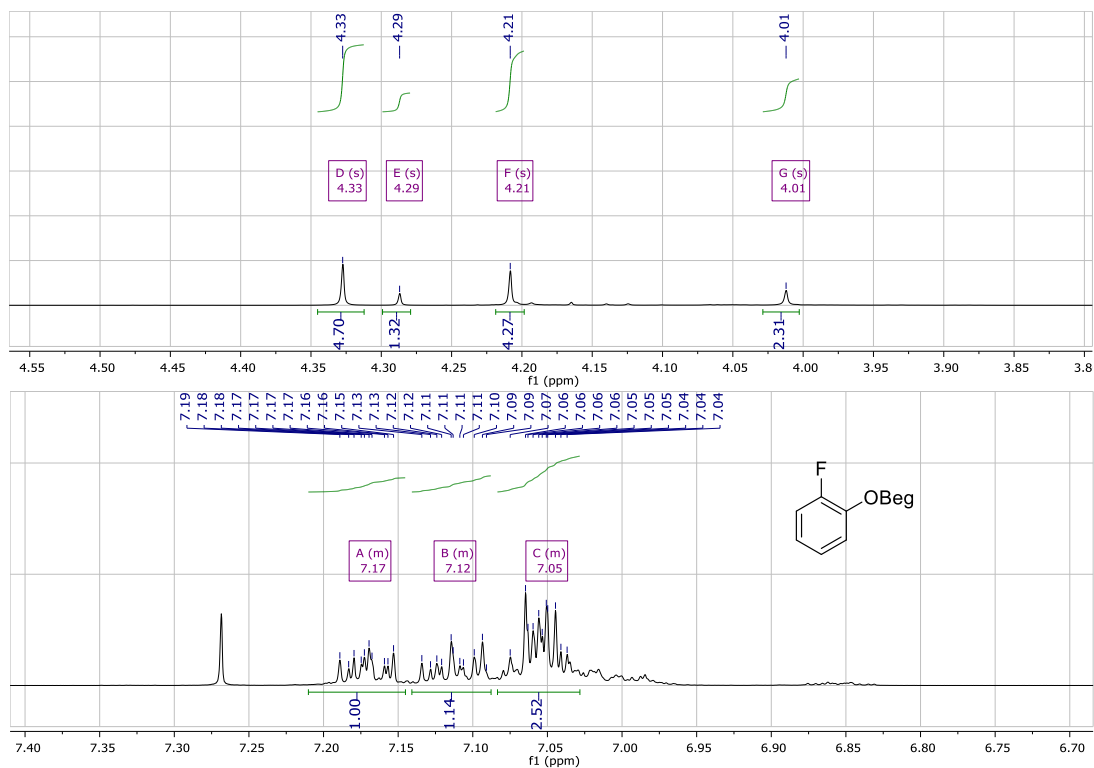 **$^{11}\text{B}$  NMR**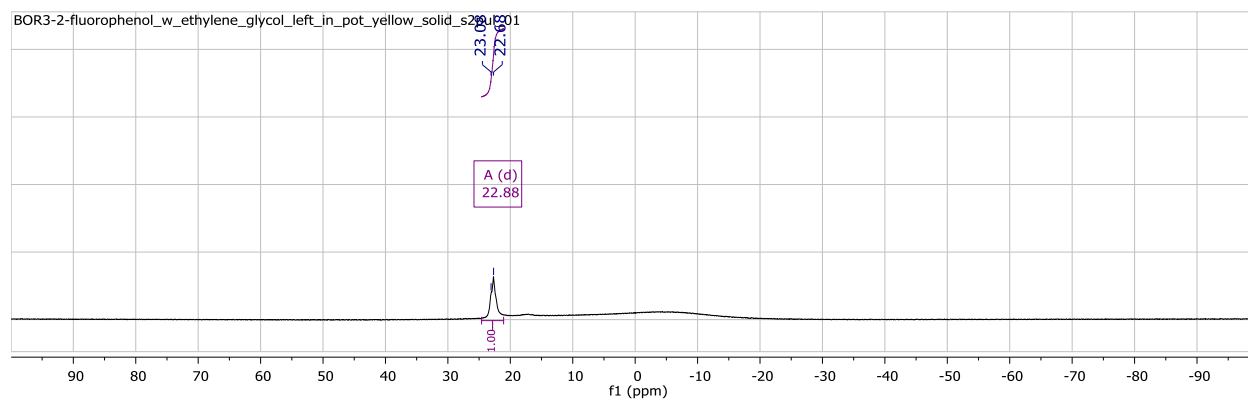**2-(2-fluorophenoxy)-1,3,2-dioxaborolane from 2-fluorophenol Route B:**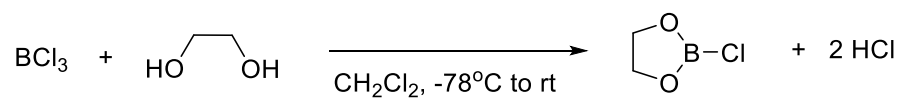

This route follows previously reported work<sup>10</sup>. In a flask under argon was  $\text{BCl}_3$  (20 mL of 1 M solution in  $\text{CH}_2\text{Cl}_2$ , 20 mmol, 1 equiv) and ethylene glycol (1.24 g, 20 mmol, 1 equiv). The flask was connected to a bubbler and the ethylene glycol was added slowly at  $-78^\circ\text{C}$ . After addition, the reaction was allowed to stir until the bath had warmed to room temperature. The reaction mixture was then distilled under vacuum at room temperature, removing  $\text{CH}_2\text{Cl}_2$ . The resulting

product was distilled at 75 °C to give a viscous oil (0.424 g, 20%) that turned a reddish brown upon warming to room temperature. The low yield is likely due to the fact that the boron trichloride solution was no longer 1 M.

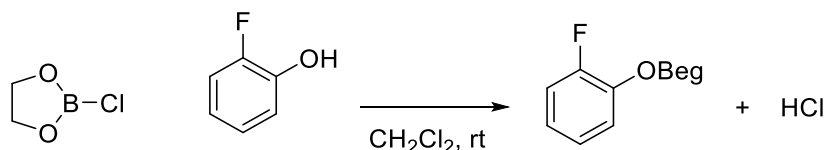

In a flask under argon was added 2-chloro-1,3,2-dioxaborolane (0.424g, 4 mmol, 1 equiv),  $\text{CH}_2\text{Cl}_2$  (5 mL), and 2-fluorophenol (0.447g, 4mmol, 1 equiv) dropwise at room temperature. The reaction mixture was sampled for NMR without isolation.  $^{19}\text{F}$ ,  $^{11}\text{B}$ ,  $^1\text{H}$  NMR were collected. It should be noted that this compound was not isolated.

### 2-(2-fluorophenoxy)-1,3,2-dioxaborolane from 2-fluorophenol Route C:

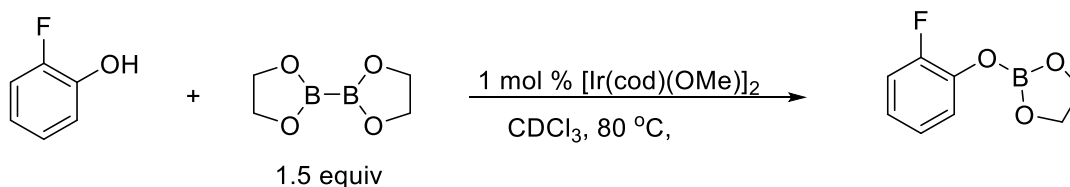

In a glove,  $[\text{Ir}(\text{OMe})(\text{cod})_2]$  (0.0006g, 1 mol %) was dissolved in 0.05 mL deuterated chloroform, 2-fluorophenol (0.0112g, 0.1 mmol, 1 equiv) was dissolved in 0.3 mL deuterated chloroform, and  $\text{B}_2\text{eg}_2$  (0.0141g, 0.1mmol, 1 equiv) was dissolved in 0.35 mL deuterated chloroform then these three solutions were transferred to a J-Young tube and  $\text{C}_6\text{F}_6$  (3  $\mu\text{L}$ ) was added as a reference. The tube was sealed with a J-Young valve the J-Young tube was then heated at 80 °C for 12 hours. After ~30 minutes the solution turned from a yellow to a black color and black sediment was observed. After heating  $^{19}\text{F}$ ,  $^{11}\text{B}$ ,  $^1\text{H}$  NMR were collected. It should be noted that this compound was not isolated.

*Comparison between route A and B to 2-(2-fluorophenoxy)-1,3,2-dioxaborolane*

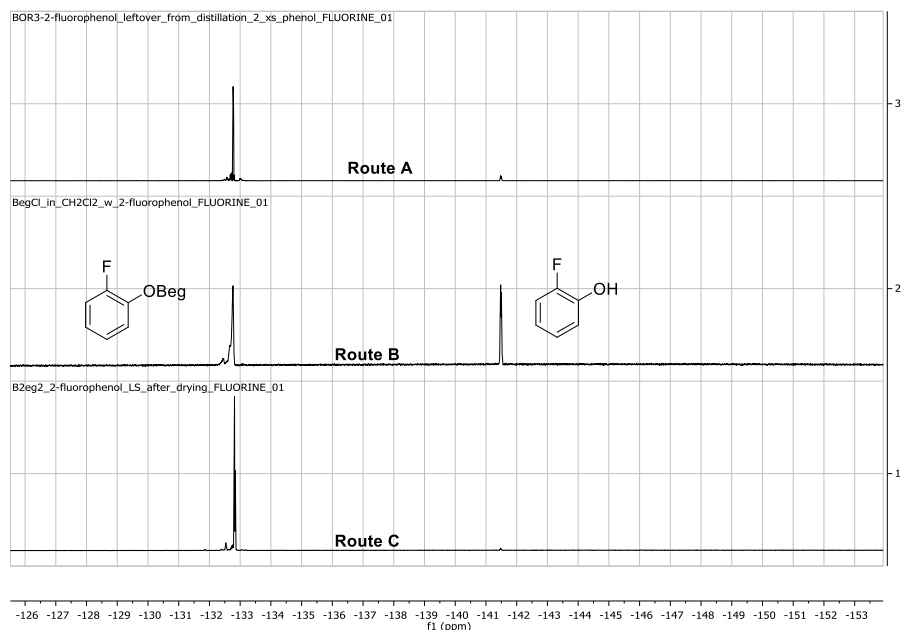

## Computational Procedures and Results

### General

Calculations of structures, energies, and frequencies employed default procedures in Gaussian09<sup>11,12,13</sup> unless otherwise noted. Complete structures and energetics are provided in sections below. All absolute energies are in Hartrees. All relative energies are presented in kcal/mol.

NPA charges were calculated with NBO 5.9.<sup>14</sup>

### Guide to Structures, Structure Titles and Their Organization

The sections below are divided into reactants and transition structures, then divided into specific structures and given a descriptive title. The first line after the title for a structure is a file name for the original calculation file, so that this file can always be located even if the file title changes. The second line after the title shows the method and basis set. The basis sets “6-31G\*” and “6-31+G\*\*” were used as their 5D formulation. For “gen” basis sets, refer to the title description for BS1 versus BSsmall. “BS1” means that the iridium atom was given an SDD basis, while the remaining atoms were given a 6-31+G\*\* basis set. “BSsmall” means that the iridium atom was given an SDD basis, while the remaining atoms were given a 6-31G\* basis set.

Alternative conformations for important structures are given, along with a short explanation, with labels such as “Conf B”. Alternative conformations for less important structures were obtained but are not included here.

It should be noted that in the case of the structures containing the Bpin’ group, the lowest-energy structures were not modeled. Rather, structures were chosen that would include the steric interactions present with the full Bpin group.



## Calculated Structures, Energies, and Selected NPA Charges

### Reactants:

#### 4-MeO-C<sub>6</sub>H<sub>4</sub>OBpin' M06/6-31+G\*\* (3)

MeOPhOBpinprimeM06PS

M06/6-31+G\*\*

E(RM06) = -753.634700207

Zero-point correction= 0.253860 (Hartree/Particle)  
 Thermal correction to Energy= 0.267961  
 Thermal correction to Enthalpy= 0.268905  
 Thermal correction to Gibbs Free Energy= 0.212837  
 Sum of electronic and ZPE= -753.380840  
 Sum of electronic and thermal Energies= -753.366739  
 Sum of electronic and thermal Enthalpies= -753.365795  
 Sum of electronic and thermal Free Energies= -753.421863

| E             | CV        | S         |
|---------------|-----------|-----------|
| KCal/Mol      | Cal/Mol-K | Cal/Mol-K |
| Total 168.148 | 55.651    | 118.005   |

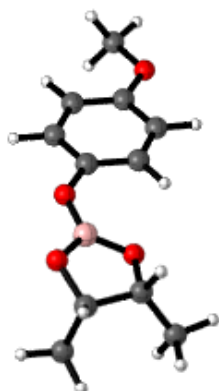

C,0,0.8989574659,0.04675157,-1.2528236824  
 C,0,0.147143111,0.1420022159,-0.0894033793  
 C,0,0.7797232518,0.0740133624,1.153879395  
 C,0,2.1556642021,-0.0927360474,1.213870955  
 C,0,2.9156662173,-0.193500707,0.0462397102  
 C,0,2.281038254,-0.1233342107,-1.1944523496  
 B,0,-2.1972793913,0.1988215786,0.6560508735  
 O,0,-2.0720714699,-0.2448591683,1.9522671682  
 C,0,-3.3523459901,-0.0416729816,2.5702695706  
 C,0,-4.3226602953,0.0302616351,1.3737083774  
 O,0,-3.489971759,0.504499287,0.3100543971  
 C,0,-4.9448597992,-1.2858673487,0.9605237132  
 H,0,-5.1048369947,0.7791788472,1.5561270504  
 H,0,-3.321650894,0.9464845268,3.0576723802  
 C,0,-3.6125201939,-1.1063594599,3.6031111688  
 H,0,0.1954779439,0.1427025846,2.0661936029  
 H,0,2.6689036733,-0.1486676044,2.1708643992  
 O,0,4.2561818668,-0.3567643838,0.2184561241  
 H,0,2.8434880167,-0.1968272326,-2.1206776068  
 H,0,0.3867903425,0.1086675615,-2.2099337028  
 O,0,-1.2016976858,0.3322974235,-0.2511374308  
 H,0,-5.6471226071,-1.625926456,1.7159535436  
 H,0,-5.4882734114,-1.1518053506,0.0201685962  
 H,0,-4.1717181058,-2.048116592,0.7988636411  
 H,0,-2.8542415077,-1.0586443948,4.3908437469

H,0,-4.596103354,-0.9638965788,4.0667167182  
 H,0,-3.576536222,-2.1061307352,3.1569519391  
 C,0,5.0548242612,-0.4767511146,-0.9330270354  
 H,0,6.0835984256,-0.5935424629,-0.5863129735  
 H,0,4.7730559866,-1.3575107137,-1.5287183578  
 H,0,4.9885746627,0.4204641401,-1.5658245525

#### 4-MeO-C<sub>6</sub>H<sub>4</sub>OBpin' M06/6-31G\* (3)

MeOPhOBpinprimeM06SB

M06/6-31G\*

E(RM06) = -753.592046918

Zero-point correction= 0.255470 (Hartree/Particle)  
 Thermal correction to Energy= 0.270366  
 Thermal correction to Enthalpy= 0.271310  
 Thermal correction to Gibbs Free Energy= 0.211998  
 Sum of electronic and ZPE= -753.336577  
 Sum of electronic and thermal Energies= -753.321681  
 Sum of electronic and thermal Enthalpies= -753.320737  
 Sum of electronic and thermal Free Energies= -753.380049

| E             | CV        | S         |
|---------------|-----------|-----------|
| KCal/Mol      | Cal/Mol-K | Cal/Mol-K |
| Total 169.657 | 57.193    | 124.831   |

C,0,0.8747774221,0.0088138081,-1.2385701465  
 C,0,0.1360719232,0.2037328314,-0.0798276431  
 C,0,0.7799555824,0.2171098778,1.1584454789  
 C,0,2.1508460814,0.026550814,1.2186764748  
 C,0,2.8980997939,-0.1747570698,0.0559974198  
 C,0,2.2524837197,-0.1819041538,-1.1797593432  
 B,0,-2.1973888152,0.2417507813,0.6676592578  
 O,0,-2.0575074242,-0.2500796355,1.9436105073  
 C,0,-3.3305541474,-0.0761560441,2.5764281788  
 C,0,-4.3101520839,0.039675822,1.3908261121  
 O,0,-3.4911801659,0.5576827718,0.3417832092  
 C,0,-4.9259073437,-1.2638635438,0.930457812  
 H,0,-5.0977650826,0.77466331,1.6091949449  
 H,0,-3.303383084,0.8915704284,3.1055886022  
 C,0,-3.5777815934,-1.1840022239,3.5673828847  
 H,0,0.2053203954,0.3660764677,2.0681642402  
 H,0,2.6750233928,0.0322175465,2.1724561333  
 O,0,4.2347796131,-0.3524414377,0.2310663836  
 H,0,2.8059058824,-0.3340357167,-2.1030769348  
 H,0,0.3532498384,0.0100333698,-2.1937112326  
 O,0,-1.2088109288,0.4156175841,-0.24063455  
 H,0,-5.6257335193,-1.6696018618,1.6719080663  
 H,0,-5.4701506443,-1.0993878456,-0.0060958567  
 H,0,-4.1457320846,-2.0140924012,0.7400413153  
 H,0,-2.8144828499,-1.1629141176,4.3533803059  
 H,0,-4.5608685196,-1.0710057412,4.0426703873  
 H,0,-3.5337808713,-2.1657759073,3.0813284388  
 C,0,5.02069274,-0.5296510024,-0.9173126076  
 H,0,6.0529677434,-0.640556183,-0.5744372205  
 H,0,4.7289689949,-1.4326876604,-1.4763973618  
 H,0,4.957234035,0.3395121331,-1.5907672566

#### 4-F-C<sub>6</sub>H<sub>4</sub>OBeg M06/6-31+G\*\*

pFPhOBegM06PS

M06/6-31+G\*\*

E(RM06) = -659.807029462



Zero-point correction= 0.157604 (Hartree/Particle)  
 Thermal correction to Energy= 0.168384  
 Thermal correction to Enthalpy= 0.169328  
 Thermal correction to Gibbs Free Energy= 0.118827  
 Sum of electronic and ZPE= -659.649425  
 Sum of electronic and thermal Energies= -659.638646  
 Sum of electronic and thermal Enthalpies= -659.637701  
 Sum of electronic and thermal Free Energies= -659.688203

| E             | CV        | S         |
|---------------|-----------|-----------|
| KCal/Mol      | Cal/Mol-K | Cal/Mol-K |
| Total 105.662 | 40.352    | 106.288   |

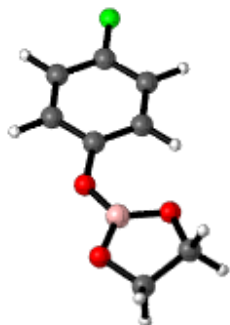

C,0,1.3598666814,1.714778561,-1.5472203797  
 C,0,2.5449651157,1.0073793838,-1.7390209685  
 C,0,3.6953658017,1.4270035763,-1.0948937266  
 C,0,3.7082877172,2.5345330629,-0.2616070565  
 C,0,2.5253961893,3.2381074405,-0.0717265177  
 C,0,1.3547237096,2.8299793695,-0.7102211815  
 F,0,4.8384961115,0.7401591254,-1.2838816112  
 O,0,0.2454532531,3.5917500885,-0.45999687  
 B,0,-1.0352785675,3.4152682273,-0.8628633734  
 O,0,-1.5044358381,2.4174249292,-1.6851934107  
 C,0,-2.9251026767,2.5416394605,-1.7172129857  
 C,0,-3.2012820295,3.9382198488,-1.1423768757  
 O,0,-2.0106667214,4.2828297056,-0.4465640645  
 H,0,2.5799587486,0.1340445037,-2.3843164931  
 H,0,4.6321464033,2.8325842198,0.2257839224  
 H,0,2.488477073,4.1127612439,0.5722091666  
 H,0,-3.3819092294,4.6817385642,-1.9301593551  
 H,0,-4.0499155876,3.9547729178,-0.4508208509  
 H,0,-3.3612390382,1.7438185463,-1.1020972688  
 H,0,-3.2791635372,2.420687702,-2.7459258146  
 H,0,0.4485484214,1.400272523,-2.0446782849

#### 4-F-C<sub>6</sub>H<sub>4</sub>OBeg M06/6-31G\*

FPhOBeg  
 M06/6-31G\* with ultrafine grid  
 E(RM06) = -659.770268208

Zero-point correction= 0.158255 (Hartree/Particle)  
 Thermal correction to Energy= 0.169057  
 Thermal correction to Enthalpy= 0.170001  
 Thermal correction to Gibbs Free Energy= 0.119105  
 Sum of electronic and ZPE= -659.612013  
 Sum of electronic and thermal Energies= -659.601211  
 Sum of electronic and thermal Enthalpies= -659.600267  
 Sum of electronic and thermal Free Energies= -659.651163

| E | CV | S |
|---|----|---|
|---|----|---|

| KCal/Mol      | Cal/Mol-K | Cal/Mol-K |
|---------------|-----------|-----------|
| Total 106.085 | 40.185    | 107.120   |

C,0,1.3945375918,1.8285285449,-1.6838374867  
 C,0,2.5602509421,1.083825301,-1.8323626913  
 C,0,3.6758082436,1.4061660193,-1.0781647546  
 C,0,3.6630346293,2.4574856908,-0.1748389782  
 C,0,2.499043982,3.1991522201,-0.0267814409  
 C,0,1.3663216693,2.8848231647,-0.7750776405  
 F,0,4.7946780634,0.6862629708,-1.225562134  
 O,0,0.2756195208,3.6863790958,-0.575847866  
 B,0,-1.0161224662,3.4578297504,-0.9123534728  
 O,0,-1.50351012,2.3526009144,-1.566011882  
 C,0,-2.9197117672,2.4735356294,-1.5817039763  
 C,0,-3.1898749047,3.9323152411,-1.1787985793  
 O,0,-1.9777872596,4.3789440505,-0.5960144407  
 H,0,2.6120833385,0.2529971319,-2.5321285674  
 H,0,4.5587104413,2.6831661559,0.3987963588  
 H,0,2.4469664161,4.0337696117,0.6688992634  
 H,0,-3.4260212191,4.5641690132,-2.0472601419  
 H,0,-4.0072242137,4.0295571739,-0.4542724168  
 H,0,-3.3451696107,1.7574616944,-0.8645276452  
 H,0,-3.2987062248,2.2252674576,-2.5800632646  
 H,0,0.5097649482,1.5855161683,-2.264872937

#### 4-F-C<sub>6</sub>H<sub>4</sub>OBpin M06/6-31+G\*\*

pPhOBPinrM06PS  
 M06/6-31+G\*\*  
 E(RM06) = -816.965258089

Zero-point correction= 0.268270 (Hartree/Particle)  
 Thermal correction to Energy= 0.284168  
 Thermal correction to Enthalpy= 0.285112  
 Thermal correction to Gibbs Free Energy= 0.224703  
 Sum of electronic and ZPE= -816.696988  
 Sum of electronic and thermal Energies= -816.681091  
 Sum of electronic and thermal Enthalpies= -816.680146  
 Sum of electronic and thermal Free Energies= -816.740555

| E             | CV        | S         |
|---------------|-----------|-----------|
| KCal/Mol      | Cal/Mol-K | Cal/Mol-K |
| Total 178.318 | 63.299    | 127.141   |

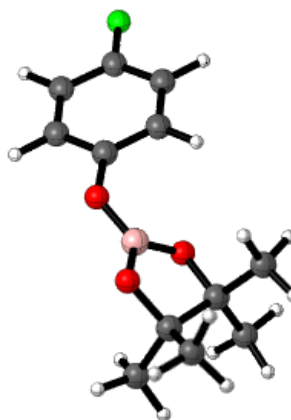

C,0,1.3113529024,1.5205835616,-1.3280876739  
 C,0,2.552358047,1.0802699327,-1.7781183977  
 C,0,3.6974899786,1.6807852908,-1.2818861015  
 C,0,3.6474023102,2.7040274395,-0.3495372323

C,0,2.4042113473,3.1413886274,0.0951052399  
 C,0,1.240521335,2.5569666925,-0.3986096007  
 F,0,4.8979334084,1.2538992845,-1.7194793262  
 O,0,0.0511522748,3.0013935726,0.1137027324  
 B,0,-1.0944119708,3.1638832652,-0.6016402162  
 O,0,-1.1914423981,3.0808424051,-1.9672369749  
 C,0,-2.6059079235,3.0707301946,-2.2690089317  
 C,0,-3.2161996147,3.7881866977,-1.0218214946  
 O,0,-2.27956574,3.4434567612,0.0219482739  
 H,0,2.638985579,0.2778070797,-2.5053107756  
 H,0,4.5705224362,3.1436571265,0.0174802413  
 H,0,2.3183511341,3.9381313147,0.8293504742  
 C,0,-3.211696971,5.3049367752,-1.143444443  
 C,0,-4.5932744318,3.3009582781,-0.6219097537  
 C,0,-3.0180664446,1.6099515155,-2.3827735989  
 C,0,-2.8286985103,3.7797940689,-3.5878079683  
 H,0,0.3971202568,1.0709776017,-1.7070970401  
 H,0,-4.9390524394,3.859323641,0.2550411286  
 H,0,-5.3134077442,3.4639092458,-1.4341835954  
 H,0,-4.588804932,2.2381219799,-0.3629166898  
 H,0,-3.4560188455,5.7355388728,-0.1662657599  
 H,0,-2.2270923224,5.6826646057,-1.4430066066  
 H,0,-3.9545825991,5.6541697602,-1.8704326764  
 H,0,-3.9012523454,3.865702324,-3.8050882275  
 H,0,-2.3881214492,4.780935561,-3.5896750492  
 H,0,-2.363967761,3.2055045153,-4.3970114646  
 H,0,-4.0665444845,1.5060888859,-2.6860673184  
 H,0,-2.3926681988,1.1283287435,-3.1432772757  
 H,0,-2.8767248835,1.0739953792,-1.4361728976

#### 4-F-C<sub>6</sub>H<sub>4</sub>OBpin M06/6-31G\*

FPhOBpinrM06Sb  
 M06/6-31G\*  
 E(RM06) = -816.916040347

Zero-point correction= 0.269582 (Hartree/Particle)  
 Thermal correction to Energy= 0.285516  
 Thermal correction to Enthalpy= 0.286460  
 Thermal correction to Gibbs Free Energy= 0.224280  
 Sum of electronic and ZPE= -816.646458  
 Sum of electronic and thermal Energies= -816.630524  
 Sum of electronic and thermal Enthalpies= -816.629580  
 Sum of electronic and thermal Free Energies= -816.691760

| E             | CV        | S         |
|---------------|-----------|-----------|
| KCal/Mol      | Cal/Mol-K | Cal/Mol-K |
| Total 179.164 | 63.046    | 130.869   |

C,0,1.6140981727,2.4483414201,-1.8641145904  
 C,0,2.8761069565,1.9881362459,-2.2266412086  
 C,0,3.8192626177,1.7370023393,-1.2445935013  
 C,0,3.5389051341,1.9338492271,0.0986100565  
 C,0,2.2794417272,2.3920713703,0.4592034099  
 C,0,1.3168504358,2.6463994847,-0.5163395443  
 F,0,5.0318809535,1.2945954038,-1.6005193389  
 O,0,0.1155988205,3.1128149747,-0.0603945436  
 B,0,-1.0676078249,3.2060920498,-0.7193559525  
 O,0,-1.2940461351,2.8936638382,-2.0372066522  
 C,0,-2.7285532996,2.9127855006,-2.2111017857  
 C,0,-3.1848507742,3.8713703728,-1.0684078667  
 O,0,-2.1822332045,3.6485689138,-0.0598182958  
 H,0,3.1365371714,1.8232732036,-3.2696366342

H,0,4.304678786,1.7279823543,0.8426210985  
 H,0,2.018839622,2.562004695,1.5015909706  
 C,0,-3.105925745,5.3407509526,-1.4576127653  
 C,0,-4.5475563178,3.5609070577,-0.4856686777  
 C,0,-3.2144735786,1.483699401,-2.0209875512  
 C,0,-3.0468470646,3.3902961257,-3.6118528066  
 H,0,0.8617283092,2.6465760772,-2.6217546956  
 H,0,-4.783274219,4.2828472212,0.3059421694  
 H,0,-5.3263283609,3.6368600836,-1.2574457969  
 H,0,-4.5833847329,2.558060551,-0.0472935026  
 H,0,-3.2243072621,5.9507160191,-0.5539885622  
 H,0,-2.1338987109,5.5862056737,-1.9049931574  
 H,0,-3.896073604,5.6173525576,-2.1676284205  
 H,0,-4.1321264651,3.501516229,-3.7442563678  
 H,0,-2.5671374051,4.3493701612,-3.834069308  
 H,0,-2.690953561,2.6555355321,-4.3448356694  
 H,0,-4.2903431849,1.3917616907,-2.2179303947  
 H,0,-2.6792115307,0.8312758186,-2.7215134082  
 H,0,-3.0148967255,1.1242284542,-1.0032457066

#### (bpy)Ir(Beg)<sub>3</sub> M06/BS1

hartwigbpyIrBeg3  
 M06/gen  
 E(RM06) = -1361.09051610

Zero-point correction= 0.370807 (Hartree/Particle)  
 Thermal correction to Energy= 0.396820  
 Thermal correction to Enthalpy= 0.397764  
 Thermal correction to Gibbs Free Energy= 0.312274  
 Sum of electronic and ZPE= -1360.719709  
 Sum of electronic and thermal Energies= -1360.693696  
 Sum of electronic and thermal Enthalpies= -1360.692752  
 Sum of electronic and thermal Free Energies= -1360.778242

| E             | CV        | S         |
|---------------|-----------|-----------|
| KCal/Mol      | Cal/Mol-K | Cal/Mol-K |
| Total 249.008 | 96.269    | 179.929   |

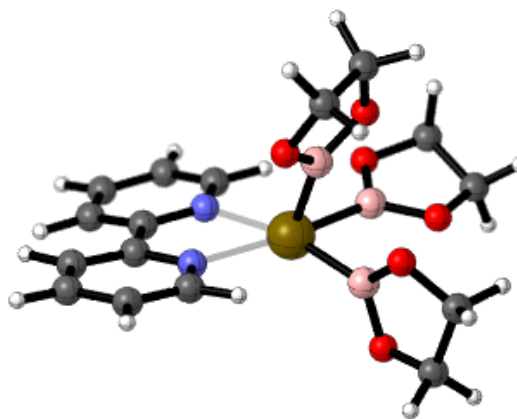

B,0,1.692786538,12.8875448334,5.6407656346  
 B,0,1.9813407921,11.0298443329,3.7297630086  
 B,0,2.5173353617,10.5405820385,6.2661351842  
 C,0,-0.313858819,11.4863345859,8.3591765148  
 H,0,0.7578461528,11.4258263238,8.536344993  
 C,0,-1.2139960623,11.7020569535,9.3945373931  
 H,0,-0.8554876842,11.8022225559,10.4145743272  
 C,0,-2.5663027972,11.7930745875,9.086367329  
 C,0,-2.9677323752,11.6680411218,7.7627857913

C,0,-2.0055334431,11.4458336439,6.7760237953  
 C,0,-2.3443384128,11.3246805757,5.3389888575  
 C,0,-3.6597886399,11.2669859103,4.877493239  
 H,0,-4.4937107382,11.2768093166,5.5730802863  
 C,0,-3.8982838978,11.1824670144,3.5117633314  
 C,0,-2.8193721186,11.1636806168,2.6362122535  
 H,0,-2.9611748436,11.1070408649,1.5610692923  
 C,0,-1.5341434789,11.2137389003,3.1644467089  
 H,0,-0.641687234,11.210616385,2.5372942534  
 C,0,2.8456097582,14.8196181405,5.3001008243  
 C,0,2.4661738637,14.6921788455,6.776041294  
 C,0,3.721511406,10.674745681,2.2824305398  
 C,0,2.6229038522,11.4663456143,1.5761223675  
 C,0,4.6495345825,10.4053582545,7.0468070627  
 C,0,3.9951349957,9.0272958918,7.1353288773  
 Ir,0,0.8049060841,11.1320867066,5.382676982  
 N,0,-0.6976375434,11.3548694517,7.0856429012  
 N,0,-1.303435399,11.28464317,4.4814613811  
 O,0,2.5223113011,13.5545856727,4.7468952648  
 O,0,1.5077292852,13.6453799433,6.7996429221  
 O,0,3.325246147,10.6691859361,3.6422147631  
 O,0,1.5055506585,11.3549988938,2.4456980143  
 O,0,3.564516933,11.2883921813,6.8107521722  
 O,0,2.7735711824,9.1765045249,6.4302732749  
 H,0,-4.0190809885,11.7588583445,7.5064017687  
 H,0,-4.9181772896,11.1331424297,3.1381252705  
 H,0,-3.3037344439,11.9669904327,9.8659669906  
 H,0,3.9106673422,15.0304681471,5.1475994242  
 H,0,2.0303885932,15.6086920765,7.1919229211  
 H,0,2.260272192,15.6002563754,4.7902101051  
 H,0,3.3297327658,14.4000872858,7.3923367112  
 H,0,5.1779455984,10.6965289354,7.9628417092  
 H,0,3.7842218503,8.7369388026,8.176870744  
 H,0,3.7832275041,9.6382493623,1.9159221903  
 H,0,2.3702681998,11.0699632013,0.5850799403  
 H,0,4.7122539856,11.1346044837,2.1837074623  
 H,0,2.8891374413,12.5289093149,1.4724844531  
 H,0,5.3505372492,10.4673992771,6.2006598375  
 H,0,4.5984865931,8.2362790618,6.6737666376

**(bpy)Ir(Beg)<sub>2</sub>(Bpin') M06/BSsmall**

bpyIRBeg2BpinprimeM06SB

M06/gen

E(RM06) = -1439.60530524

Zero-point correction= 0.428507 (Hartree/Particle)  
 Thermal correction to Energy= 0.457180  
 Thermal correction to Enthalpy= 0.458124  
 Thermal correction to Gibbs Free Energy= 0.366862  
 Sum of electronic and ZPE= -1439.176799  
 Sum of electronic and thermal Energies= -1439.148125  
 Sum of electronic and thermal Enthalpies= -1439.147181  
 Sum of electronic and thermal Free Energies= -1439.238443

E CV S  
 KCal/Mol Cal/Mol-K Cal/Mol-K  
 Total 286.885 106.972 192.077

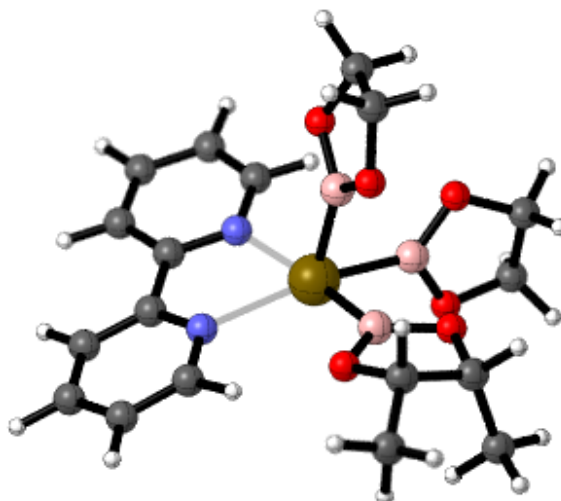

B,0,1.7292028143,12.8794869661,5.6177213404  
 B,0,1.9828687113,10.9924072899,3.7534100062  
 B,0,2.5122670622,10.5715560996,6.2906498292  
 C,0,-0.3305631132,11.6179680635,8.355687241  
 H,0,0.7436274806,11.6093684422,8.5303988905  
 C,0,-1.2389279101,11.8494695936,9.3797482848  
 H,0,-0.8854428638,12.016097121,10.3939230327  
 C,0,-2.5925335339,11.8695331394,9.0698441354  
 C,0,-2.9884689129,11.6617175927,7.7559350467  
 C,0,-2.0188351467,11.4297620414,6.7804739034  
 C,0,-2.3511970005,11.2289204694,5.3513933961  
 C,0,-3.6607354299,11.0849074062,4.8953429955  
 H,0,-4.4942275743,11.0738360368,5.5930651128  
 C,0,-3.8945596561,10.9424631032,3.5344646341  
 C,0,-2.8178054615,10.9509761138,2.6579764591  
 H,0,-2.9580593013,10.8521707973,1.5845177477  
 C,0,-1.5368371807,11.081625397,3.1814531143  
 H,0,-0.6439271763,11.096868748,2.5544673045  
 C,0,2.9368193346,14.7661970532,5.2403861523  
 C,0,2.5725336914,14.6612756511,6.7221238379  
 C,0,3.7340146658,10.5719051112,2.3346689648  
 C,0,2.6458455262,11.370992553,1.6017745808  
 C,0,4.6431022825,10.4729840244,7.0706777069  
 C,0,4.0312684054,9.0708178518,7.1003115071  
 Ir,0,0.8007923544,11.1424236928,5.3968949342  
 N,0,-0.7086431741,11.4077630145,7.0918701411  
 N,0,-1.3100154545,11.2093924036,4.4938370398  
 O,0,2.5553779653,13.515655717,4.6991596892  
 O,0,1.5743866924,13.6586490375,6.7655348106  
 O,0,3.3393972124,10.6743683255,3.6956766643  
 O,0,1.5101761779,11.2356355253,2.451822982  
 O,0,3.5413645077,11.3332022032,6.8508888606  
 O,0,2.7931087498,9.2114191872,6.4319165246  
 H,0,-4.0431852962,11.7004848042,7.4961854645  
 H,0,-4.9117959329,10.8281887646,3.1648308369  
 H,0,-3.3373146639,12.0534705754,9.8416291827  
 H,0,4.0087171988,14.9339780609,5.0745207238  
 H,0,2.1871155889,15.5994957208,7.1421457453  
 H,0,2.3803246483,15.5710988427,4.7333789723  
 H,0,3.4346997897,14.3327553405,7.3240032786  
 H,0,5.1526754802,10.7435047002,8.005143512  
 H,0,3.858270685,8.7166020837,8.1298134033  
 C,0,3.833348728,9.1072463928,1.9579040043  
 C,0,2.3134767367,10.9422327345,0.1940812472

H,0,4.7154844886,11.0556528809,2.2151544149  
 H,0,2.9376962102,12.4364051772,1.6054447768  
 H,0,5.35868521,10.5848428477,6.2408518238  
 H,0,4.6518918045,8.3254143862,6.5853488015  
 H,0,4.5124978392,8.5998473597,2.6531595784  
 H,0,2.8508878793,8.6215801921,2.0397829585  
 H,0,4.2118201956,8.9671376682,0.9364224366  
 H,0,1.5208689929,11.57805572,-0.2185116115  
 H,0,3.1911316078,11.0251963796,-0.4611910083  
 H,0,1.9614770648,9.9030675958,0.172548588

### (bpy)Ir(Beg)<sub>2</sub>(Bpin') M06/BS1

bpyIRBeg2BpinprimeM06PS

M06/gen

E(RM06) = -1439.66858895

Zero-point correction= 0.426348 (Hartree/Particle)  
 Thermal correction to Energy= 0.455049  
 Thermal correction to Enthalpy= 0.455994  
 Thermal correction to Gibbs Free Energy= 0.365325  
 Sum of electronic and ZPE= -1439.242241  
 Sum of electronic and thermal Energies= -1439.213540  
 Sum of electronic and thermal Enthalpies= -1439.212595  
 Sum of electronic and thermal Free Energies= -1439.303264

| E             | CV        | S         |
|---------------|-----------|-----------|
| KCal/Mol      | Cal/Mol-K | Cal/Mol-K |
| Total 285.548 | 107.503   | 190.828   |

B,0,1.708738587,12.8786923147,5.5963203156  
 B,0,1.9979558507,10.9676236296,3.7441294316  
 B,0,2.5402411653,10.5796465499,6.3047574858  
 C,0,-0.309034201,11.5540828632,8.3621601343  
 H,0,0.7634861549,11.533598095,8.5429954138  
 C,0,-1.2180972074,11.7718539863,9.3895387956  
 H,0,-0.8647947396,11.9188687031,10.405728112  
 C,0,-2.5724170684,11.8022456802,9.0785211538  
 C,0,-2.9671066281,11.6195614997,7.7597566827  
 C,0,-1.9958659297,11.4038583228,6.7804962777  
 C,0,-2.3295368768,11.2344050427,5.3469408724  
 C,0,-3.6432655882,11.1385087658,4.886333207  
 H,0,-4.4784146975,11.1493873821,5.5802298066  
 C,0,-3.8790019523,11.019857265,3.522621428  
 C,0,-2.7991379252,11.0055854627,2.6481937949  
 H,0,-2.9390311985,10.9248055455,1.574205832  
 C,0,-1.5156371391,11.0924345966,3.1759392147  
 H,0,-0.6237600248,11.0914764809,2.5484874113  
 C,0,2.8863053172,14.7888307001,5.2208878817  
 C,0,2.5172342471,14.6821731052,6.7011432925  
 C,0,3.7315498582,10.5201309369,2.3032168183  
 C,0,2.6625088531,11.3631259324,1.5912646839  
 C,0,4.6783358293,10.4908552201,7.0772321654  
 C,0,4.0221991776,9.1233943199,7.2611254179  
 Ir,0,0.8227334328,11.1152869642,5.3946822829  
 N,0,-0.6859146006,11.368942824,7.0931569567  
 N,0,-1.2874321809,11.1962767815,4.4910738173  
 O,0,2.5347283696,13.5238436442,4.6839911163  
 O,0,1.5315998965,13.6619129802,6.7398871134  
 O,0,3.343852731,10.6075666922,3.6707664483  
 O,0,1.5264094102,11.243458085,2.4470844897  
 O,0,3.5925416124,11.3588360288,6.7953661688  
 O,0,2.796179502,9.2282306014,6.5557157611

H,0,-4.0208411979,11.6619039697,7.5011493839  
 H,0,-4.8974211993,10.9424777113,3.1498108801  
 H,0,-3.316702665,11.9738197888,9.8521540254  
 H,0,3.9541464592,14.9770193448,5.058022682  
 H,0,2.1120912396,15.6129132841,7.1162027824  
 H,0,2.3120029162,15.575178999,4.7072222577  
 H,0,3.3784230346,14.364784555,7.3083049858  
 H,0,5.2161229811,10.838792212,7.9676151936  
 H,0,3.8171540573,8.9040087163,8.3210553778  
 C,0,3.7953878682,9.061729745,1.8954091239  
 C,0,2.3118186598,10.9733499011,0.1768795085  
 H,0,4.7232560748,10.9831246895,2.191895763  
 H,0,2.9823466173,12.4193686328,1.6155869238  
 H,0,5.3715508405,10.4964034238,6.2222453296  
 H,0,4.6201863425,8.3008845265,6.8503551477  
 H,0,4.4736541089,8.5267900018,2.5682619593  
 H,0,2.8057239849,8.5939678412,1.9782124116  
 H,0,4.158711119,8.9394506042,0.867377184  
 H,0,1.5402454091,11.6426056534,-0.2188301844  
 H,0,3.1898958463,11.0429836792,-0.4776165859  
 H,0,1.9282444662,9.9471597184,0.1354000661

### (bpy)Ir(Bpin)<sub>3</sub> M06/BSsmall

bpyIrBPIN3M06SB

M06/gen

E(RM06) = -1832.47310358

Zero-point correction= 0.706376 (Hartree/Particle)  
 Thermal correction to Energy= 0.748008  
 Thermal correction to Enthalpy= 0.748952  
 Thermal correction to Gibbs Free Energy= 0.633777  
 Sum of electronic and ZPE= -1831.766728  
 Sum of electronic and thermal Energies= -1831.725095  
 Sum of electronic and thermal Enthalpies= -1831.724151  
 Sum of electronic and thermal Free Energies= -1831.839326

| E             | CV        | S         |
|---------------|-----------|-----------|
| KCal/Mol      | Cal/Mol-K | Cal/Mol-K |
| Total 469.382 | 164.337   | 242.407   |

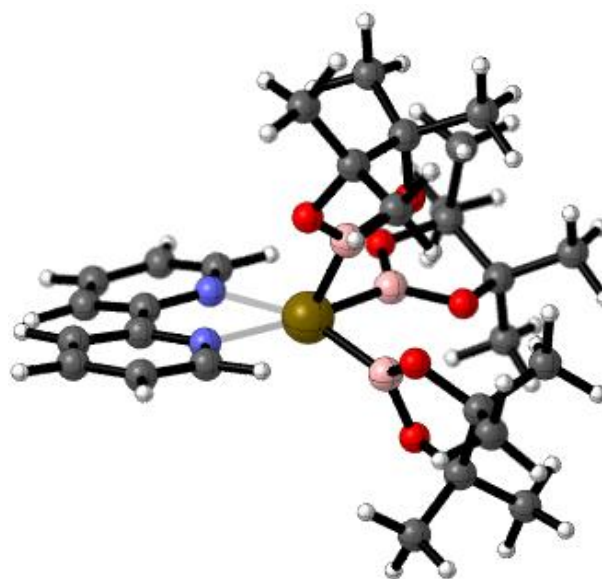

B,0,1.7486487866,12.8651667202,5.6436466567

B,0,1.9830539063,11.0359387379,3.6889461925  
 B,0,2.4691757191,10.5218527746,6.3058612124  
 C,0,-0.3090934882,11.5581839099,8.317279416  
 H,0,0.7663765691,11.5533320052,8.4936564246  
 C,0,-1.2197329071,11.7780809625,9.3419771424  
 H,0,-0.8670974295,11.9386371893,10.3575064553  
 C,0,-2.5738383881,11.7948757785,9.032022593  
 C,0,-2.967635046,11.5925422707,7.717088089  
 C,0,-1.9972237259,11.3678108224,6.7411714087  
 C,0,-2.3330730153,11.1610282988,5.3141766808  
 C,0,-3.6412129582,10.9778993967,4.8674179371  
 H,0,-4.4697768575,10.9437507891,5.5703521419  
 C,0,-3.8800639168,10.6228821308,3.5089187739  
 C,0,-2.810120496,10.8518738952,2.6249348467  
 H,0,-2.9549574487,10.7387408195,1.5536150849  
 C,0,-1.5300746492,11.0221182427,3.1385853242  
 H,0,-0.6426709304,11.0560483323,2.5046108061  
 C,0,2.8592936883,14.8204745746,5.2573736617  
 C,0,2.2573215111,14.8343671816,6.6928686772  
 C,0,3.7103469338,10.6228821308,2.2256797264  
 C,0,2.6194991877,11.4795923125,1.5186102629  
 C,0,4.468574594,10.4341223494,7.4118931106  
 C,0,3.958479434,8.9880422786,7.1434015516  
 Ir,0,0.8114281091,11.1390028756,5.3472340106  
 N,0,-0.6864035418,11.3517132171,7.0519106765  
 N,0,-1.2979024999,11.167077682,4.4483156474  
 O,0,2.7882880966,13.4312718604,4.9117751009  
 O,0,1.3164152995,13.752221378,6.6314634745  
 O,0,3.3323097153,10.7142794212,3.5984330504  
 O,0,1.4963297866,11.325624533,2.4002587977  
 O,0,3.2786620142,11.2112615329,7.2161278646  
 O,0,2.9032053627,9.2018995114,6.2017991861  
 H,0,-4.0219707215,11.6284186225,7.4547501786  
 H,0,-4.8961933392,10.6728634839,3.1481702403  
 H,0,-3.3195010111,11.9711573564,9.8047404054  
 C,0,4.3011996185,15.2761294082,5.1561503735  
 C,0,1.5204003704,16.1062137773,7.0644196005  
 C,0,2.0045909609,15.5834015693,4.2508428038  
 C,0,3.2781847524,14.4949454043,7.7707570673  
 C,0,4.9957381147,10.6804260143,8.8118625933  
 C,0,3.3437245028,8.335298002,8.3753427187  
 C,0,3.6591790042,9.1501118408,1.837476744  
 C,0,2.2316303896,11.0060356438,0.1315361402  
 C,0,5.127580316,11.1449348016,2.0827970092  
 C,0,2.9623814377,12.9636189738,1.4818573151  
 C,0,5.4842553706,10.9122596447,6.3805577703  
 C,0,4.9850940687,8.0618873943,6.5212432503  
 H,0,5.3141459582,11.7271966489,8.90783357  
 H,0,4.2327562438,10.4904460043,9.5753323494  
 H,0,5.8680134,10.0443040222,9.0215763649  
 H,0,2.8252919594,7.4191188404,8.0656575647  
 H,0,4.1007457777,8.0673199805,9.1253450726  
 H,0,2.6043568767,8.9986989772,8.8446877782  
 H,0,4.5463634329,7.0660850967,6.3764024728  
 H,0,5.3061671309,8.4336117637,5.5413474194  
 H,0,5.8678022097,7.9555518446,7.1686752448  
 H,0,5.6538584824,11.9868402828,6.531393116  
 H,0,6.4495378338,10.397401646,6.4839307084  
 H,0,5.1037688008,10.7751158776,5.3591445441  
 H,0,4.2964231804,8.5843287431,2.5287176031  
 H,0,2.6398760124,8.7521155606,1.9249479304  
 H,0,4.0194350779,8.9797247591,0.8133840183

H,0,5.8186930988,10.4709903061,2.6074175704  
 H,0,5.4341122298,11.1916284465,1.0274955808  
 H,0,5.2311617403,12.1410891228,2.5293737038  
 H,0,1.4647954185,11.6721697319,-0.285882882  
 H,0,3.0964771166,11.0247005681,-0.5474871836  
 H,0,1.8234897436,9.9891549888,0.14687194  
 H,0,2.0714932386,13.5218564218,1.1636574521  
 H,0,3.2461807356,13.3192823624,2.4808613662  
 H,0,3.7746489623,13.1789215186,0.7739289255  
 H,0,2.7424580089,14.3109732033,8.7118770056  
 H,0,3.824142395,13.5777904346,7.5193668081  
 H,0,3.9888176626,15.3169516103,7.9337283593  
 H,0,1.1301202063,16.0184177182,8.0867361238  
 H,0,2.1950723884,16.9742011898,7.0349473062  
 H,0,0.673579444,16.2972147858,6.3962021507  
 H,0,4.6353765964,15.2082377245,4.1118467429  
 H,0,4.4086167202,16.3219859426,5.4787928511  
 H,0,4.9665958375,14.6511285636,5.7610002292  
 H,0,2.3678251583,15.3668739179,3.2381459409  
 H,0,0.9542709754,15.2679133089,4.3049840102  
 H,0,2.0554596951,16.669497519,4.4076320459

### (bpy)Ir(Bpin)<sub>3</sub> M06/BS1

bpyIrBPIN3M06PS  
 M06/gen  
 E(RM06) = -1832.56850386

Zero-point correction= 0.702334 (Hartree/Particle)  
 Thermal correction to Energy= 0.744053  
 Thermal correction to Enthalpy= 0.744997  
 Thermal correction to Gibbs Free Energy= 0.629418  
 Sum of electronic and ZPE= -1831.866170  
 Sum of electronic and thermal Energies= -1831.824451  
 Sum of electronic and thermal Enthalpies= -1831.823507  
 Sum of electronic and thermal Free Energies= -1831.939086

| E             | CV        | S         |
|---------------|-----------|-----------|
| KCal/Mol      | Cal/Mol-K | Cal/Mol-K |
| Total 466.900 | 165.113   | 243.258   |

B,0,1.702656396,12.81576038,5.629151248  
 B,0,1.9907846418,10.9705100756,3.6862387279  
 B,0,2.4847626304,10.462190892,6.3036486155  
 C,0,-0.2797684939,11.4783651155,8.3204529209  
 H,0,0.7935219563,11.4144638053,8.4971923378  
 C,0,-1.17585085,11.737269258,9.3494956722  
 H,0,-0.8134727557,11.8669502086,10.3649678841  
 C,0,-2.5287150892,11.8308863731,9.0421983669  
 C,0,-2.9338555516,11.668370084,7.7243553641  
 C,0,-1.9769049769,11.4047521575,6.7430354132  
 C,0,-2.3250061564,11.2477601425,5.3120507786  
 C,0,-3.6443790777,11.1742707873,4.8631043474  
 H,0,-4.4729318695,11.1946964594,5.5649242952  
 C,0,-3.8945517716,11.059560052,3.5016037415  
 C,0,-2.8233537973,11.0250241139,2.6171767633  
 H,0,-2.9748161052,10.9442087212,1.5448429533  
 C,0,-1.5336983374,11.0893122821,3.1330136711  
 H,0,-0.647293054,11.0715219421,2.497804681  
 C,0,2.7879195409,14.7905815698,5.2458118742  
 C,0,2.1898397111,14.790533439,6.6847297254  
 C,0,3.7408429711,10.6066965416,2.2271796147  
 C,0,2.6275176965,11.4316830506,1.5128539037

C,0,4.4916264785,10.4281721124,7.4111046142  
 C,0,4.0098240523,8.9676172461,7.1600557767  
 Ir,0,0.815336571,11.0605584375,5.3462184806  
 N,0,-0.6691764905,11.3070766058,7.0524494766  
 N,0,-1.2914755228,11.1920914615,4.4457559842  
 O,0,2.7247012316,13.401301857,4.8899910355  
 O,0,1.2629460459,13.6924269636,6.6228009483  
 O,0,3.3452521745,10.6730021654,3.5983100081  
 O,0,1.5048456201,11.255277218,2.3949971653  
 O,0,3.2858920839,11.1802142682,7.2011673693  
 O,0,2.942986086,9.1493790369,6.2205229793  
 H,0,-3.9841606241,11.7640484177,7.4653439874  
 H,0,-4.9176991845,10.9987453435,3.1388471727  
 H,0,-3.2621885236,12.0374643922,9.8176083211  
 C,0,4.2277381809,15.2534226683,5.1434098069  
 C,0,1.432621266,16.0491735662,7.0610652426  
 C,0,1.9253322846,15.5518687787,4.2448281496  
 C,0,3.2170290489,14.4644437431,7.7618638906  
 C,0,5.0082371019,10.701092152,8.8105140934  
 C,0,3.4131377961,8.3144256547,8.4008688619  
 C,0,3.7453585289,9.1347391822,1.8322492939  
 C,0,2.2549735323,10.9372727402,0.1283894238  
 C,0,5.1397753098,11.1816757621,2.1061891211  
 C,0,2.9298534183,12.9243334004,1.4642914159  
 C,0,5.5013739831,10.9165126318,6.3778421803  
 C,0,5.0506840221,8.0552810209,6.5407843596  
 H,0,5.3126192294,11.7518248756,8.8918073667  
 H,0,4.2437000316,10.5125005929,9.5711490161  
 H,0,5.8857435152,10.0785531909,9.0321607731  
 H,0,2.9082464795,7.3895972336,8.0988832208  
 H,0,4.1794502503,8.0640793884,9.1457674228  
 H,0,2.6667380531,8.9682191089,8.8698618887  
 H,0,4.6255435114,7.0539719772,6.4033933692  
 H,0,5.364633176,8.4252168813,5.5591344092  
 H,0,5.9342520276,7.966242607,7.1878080141  
 H,0,5.6598228448,11.9915410453,6.5295266367  
 H,0,6.4699442911,10.4100973302,6.4799693911  
 H,0,5.1191622874,10.779487087,5.3581919822  
 H,0,4.3954740436,8.5914550756,2.5279501092  
 H,0,2.7410684553,8.7014573042,1.9103434005  
 H,0,4.120168713,8.9812768805,0.8119045328  
 H,0,5.8461949581,10.5297029562,2.635533224  
 H,0,5.4572575503,11.2466600974,1.0563191601  
 H,0,5.1973076896,12.1772909315,2.560804177  
 H,0,1.4674168874,11.5760545181,-0.2897138239  
 H,0,3.1190631923,10.9827953234,-0.5484881727  
 H,0,1.8828993079,9.9081107759,0.1492641755  
 H,0,2.0303517729,13.4523639335,1.1234468252  
 H,0,3.1836398323,13.3007281214,2.4623793155  
 H,0,3.7485634406,13.1509281292,0.7691861659  
 H,0,2.6828016088,14.2697560742,8.7004775896  
 H,0,3.7807401799,13.5582654416,7.5133742074  
 H,0,3.9103185438,15.2993189599,7.9266783828  
 H,0,1.0514058296,15.952207172,8.0846217311  
 H,0,2.0911917837,16.9278983695,7.0273096883  
 H,0,0.5792354242,16.2234878381,6.3986029941  
 H,0,4.5560626699,15.1959796065,4.0979175764  
 H,0,4.3315779317,16.2953859827,5.4755156275  
 H,0,4.8960373227,14.6246678035,5.7392864108  
 H,0,2.2927289862,15.3446274713,3.2329340955  
 H,0,0.8799086422,15.2236444643,4.2962921773  
 H,0,1.9654124076,16.6361421739,4.4083928807

**(tbut-bpy)Ir(Beg)<sub>3</sub> M06/BSsmall**

tbutpyIrBeg3M06SB

M06/gen

E(RM06) = -1675.28804397

Zero-point correction= 0.597715 (Hartree/Particle)

Thermal correction to Energy= 0.634805

Thermal correction to Enthalpy= 0.635749

Thermal correction to Gibbs Free Energy= 0.525333

Sum of electronic and ZPE= -1674.690329

Sum of electronic and thermal Energies= -1674.653239

Sum of electronic and thermal Enthalpies= -1674.652295

Sum of electronic and thermal Free Energies= -1674.762711

| E             | CV        | S         |
|---------------|-----------|-----------|
| KCal/Mol      | Cal/Mol-K | Cal/Mol-K |
| Total 398.346 | 139.305   | 232.391   |

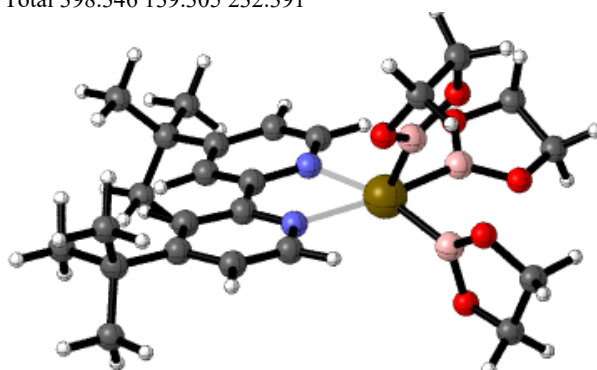

B,0,1.8548885546,12.8827177365,5.6759359686  
 B,0,2.0314072582,11.1044058525,3.6960525868  
 B,0,2.5769118175,10.5153153442,6.205558954  
 C,0,-0.230485539,11.5267347784,8.3526470903  
 H,0,0.8428043385,11.4808370377,8.5286450327  
 C,0,-1.1288038401,11.7258127962,9.3860733413  
 H,0,-0.7485607827,11.8213078145,10.4012932711  
 C,0,-2.4981126425,11.8125687762,9.1147827168  
 C,0,-2.8759010311,11.6889063559,7.7797567543  
 C,0,-1.9194847739,11.479579329,6.7851499193  
 C,0,-2.2702834828,11.3627659603,5.3494364881  
 C,0,-3.5815631783,11.2775600419,4.8961184422  
 H,0,-4.397595482,11.2572117423,5.6153180288  
 C,0,-3.8668065915,11.2008896939,3.5291719012  
 C,0,-2.7752183466,11.2218648796,2.6637387478  
 H,0,-2.9035099071,11.1764655877,1.5857396493  
 C,0,-1.4853687225,11.2933008609,3.1768419828  
 H,0,-0.604535897,11.3155949167,2.5327117508  
 C,0,3.0694090369,14.7792510066,5.3692670709  
 C,0,2.687304143,14.6369238496,6.8443760017  
 C,0,3.7510934595,10.7627584803,2.2265269518  
 C,0,2.6489873105,11.573901015,1.5451672412  
 C,0,4.7069973409,10.285172731,6.9559995413  
 C,0,4.0186841732,8.9208257244,6.9719258187  
 Ir,0,0.8779232505,11.1893665068,5.36274925  
 N,0,-0.610033675,11.3981132199,7.0771262403  
 N,0,-1.2316409449,11.3541678187,4.4861227906  
 O,0,2.6937311477,13.5464309075,4.7877061271  
 O,0,1.7122829426,13.6115595784,6.8584014928  
 O,0,3.365967227,10.7185186481,3.5843007217  
 O,0,1.5477598772,11.4769141595,2.4292699432

O,0,3.6465916359,11.2057690087,6.7824103867  
 O,0,2.7985441092,9.1381933877,6.2910810334  
 H,0,-3.9234231621,11.7729938175,7.505174743  
 C,0,-5.309998858,11.0923003743,3.0522956035  
 C,0,-3.4940507871,12.0459710505,10.2429314898  
 H,0,4.1430911606,14.9525781326,5.2207398672  
 H,0,2.2729393969,15.558678084,7.2741368345  
 H,0,2.5192862509,15.5988289414,4.8789658505  
 H,0,3.548312285,14.3261935089,7.4569685314  
 H,0,5.2548650238,10.5071344851,7.8814591649  
 H,0,3.81377006,8.5775928135,7.999905078  
 H,0,3.8137130745,9.7368222657,1.828051258  
 H,0,2.37633814,11.1867337201,0.5540691713  
 H,0,4.7422484993,11.2252096718,2.1298684424  
 H,0,2.9318825846,12.6328504323,1.435998992  
 H,0,5.4049559076,10.3754061576,6.1083095654  
 H,0,4.6011531906,8.1409026249,6.4642301004  
 C,0,-4.9364014307,12.095325208,9.7444204578  
 C,0,-3.3747884966,10.9064798347,11.261756251  
 C,0,-3.1736787507,13.3817310739,10.9241974671  
 H,0,-5.6115157468,12.2671050972,10.5931296872  
 H,0,-5.0951118857,12.9134631792,9.0279594486  
 H,0,-5.2392662975,11.151806202,9.2690145655  
 H,0,-4.0964755703,11.0536009725,12.0775079662  
 H,0,-3.5833795315,9.9346976233,10.7937393948  
 H,0,-2.3741935418,10.8555097516,11.7097135951  
 H,0,-3.8801383024,13.5631221997,11.7464008248  
 H,0,-2.1603479246,13.3985300714,11.3453597838  
 H,0,-3.2554272415,14.2158593719,10.2140119526  
 C,0,-5.4082207392,11.0447844925,1.529515461  
 C,0,-5.9279863572,9.8072974531,3.6161925863  
 C,0,-6.1033689365,12.3069578441,3.5477454649  
 H,0,-6.4621012123,10.9632065577,1.2323327367  
 H,0,-5.0036572267,11.9542093434,1.0644190934  
 H,0,-4.8797433449,10.1771681998,1.1113500589  
 H,0,-7.1431593905,12.243736187,3.197577939  
 H,0,-6.1272233064,12.3700251763,4.6434153341  
 H,0,-5.6725684537,13.2426908522,3.1661616486  
 H,0,-6.9678519598,9.7096557619,3.2742247525  
 H,0,-5.3734648865,8.9215801545,3.2775048663  
 H,0,-5.9370590187,9.7979917653,4.7139727339

**Transition Structures:**  
**TS3-OBpin<sup>anti</sup> M06/BSsmall**  
 OBegleftantimetaOMeM06SB  
 M06/gen  
 E(RM06) = -2193.18937429

Zero-point correction= 0.682041 (Hartree/Particle)  
 Thermal correction to Energy= 0.725667  
 Thermal correction to Enthalpy= 0.726611  
 Thermal correction to Gibbs Free Energy= 0.606528  
 Sum of electronic and ZPE= -2192.507333  
 Sum of electronic and thermal Energies= -2192.463707  
 Sum of electronic and thermal Enthalpies= -2192.462763  
 Sum of electronic and thermal Free Energies= -2192.582846

| E             | CV        | S         |
|---------------|-----------|-----------|
| KCal/Mol      | Cal/Mol-K | Cal/Mol-K |
| Total 455.363 | 167.968   | 252.736   |

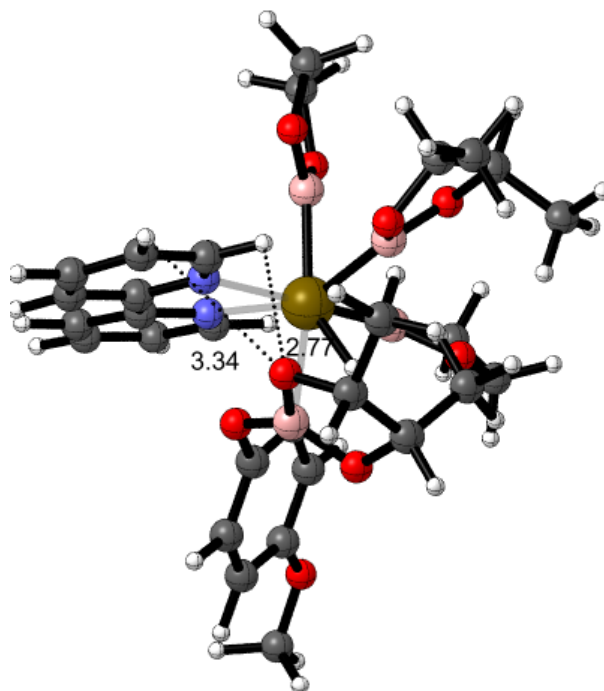

C,0,3.5609557514,0.2010813501,2.9702170343  
 C,0,2.3465361305,0.0880035865,2.2927747296  
 N,0,2.2785030042,-0.5593437922,1.1114144307  
 C,0,3.3751864716,-1.1156840926,0.5873894674  
 C,0,4.6124161331,-1.0392028647,1.2127062384  
 C,0,4.7035759076,-0.3617700765,2.4211864776  
 C,0,1.0737926044,0.615122503,2.8329982715  
 N,0,-0.0304918251,0.3263492787,2.1234092939  
 C,0,-1.2273265207,0.6959912613,2.5770541401  
 C,0,-1.3847311775,1.4150204918,3.7547369653  
 C,0,-0.2502850977,1.7520638692,4.479116308  
 C,0,0.994101251,1.34167461,4.0207930673  
 Ir,0,0.3087544863,-0.5309623767,0.0197824122  
 B,0,0.7738968876,-1.3277477366,-1.7892584164  
 O,0,0.1284718577,-1.0325753194,-2.9860353036  
 C,0,0.9155757334,-1.5097201279,-4.0592145519  
 C,0,1.9085305223,-2.4744777515,-3.4082496763  
 O,0,1.9052664266,-2.1064389012,-2.0389726012  
 C,0,1.0234849562,1.439992062,-0.7199690365  
 C,0,2.0869216554,1.4159883662,-1.6264929268  
 C,0,2.8718296207,2.5399166592,-1.8960164162  
 C,0,2.5928304302,3.750844512,-1.268278799  
 C,0,1.5134823733,3.8082964088,-0.3906657056  
 C,0,0.7434749023,2.6849863014,-0.1323809168  
 O,0,3.8902590717,2.3473552054,-2.7824285857  
 O,0,-0.3230374555,2.8308628155,0.7393401607  
 B,0,-1.5569078861,3.0221671987,0.2117843534  
 O,0,-1.7960010473,3.3177764995,-1.1052267737  
 C,0,-3.2044581235,3.1733475604,-1.297976995  
 C,0,-3.4588015882,1.8341669761,-1.9546834044  
 B,0,0.0269850742,-2.4545261453,0.8632607737  
 O,0,0.8465310391,-3.5434628176,0.6311548739  
 C,0,0.4365612398,-4.6050009427,1.4780822161  
 C,0,-0.9457924521,-4.1804325253,1.9668086668  
 O,0,-0.9509735364,-2.7715314549,1.8080241884  
 B,0,-1.5592702547,-1.3159565562,-0.380964026  
 O,0,-2.7564788645,-0.8117035008,0.1444859143

C,0,-3.7383286868,-1.8405281725,-0.0046317547  
 C,0,-5.1299591556,-1.2695284492,-0.0990509759  
 O,0,-1.8205613661,-2.4765891897,-1.1085996381  
 C,0,-3.2317410506,-2.6304234433,-1.2155481861  
 C,0,-3.6802930951,-2.1145147072,-2.5672369741  
 O,0,-2.6915029246,2.9426850216,0.9808773805  
 C,0,-3.7719421155,3.3359960681,0.1303808355  
 C,0,-5.0017217722,2.5318096878,0.4640572318  
 H,0,-0.3598928704,0.6331571773,-0.9590140192  
 H,0,-2.0738497859,0.4205231241,1.9483813811  
 H,0,1.8895428896,1.5936413519,4.5833189521  
 H,0,-2.3780978599,1.7211411528,4.0719988135  
 H,0,-0.3283530404,2.3308489026,5.397650439  
 H,0,3.6173041265,0.7196243619,3.9235151109  
 H,0,5.6564681832,-0.2764588765,2.9402466784  
 H,0,5.4812775667,-1.5021671394,0.7522072949  
 H,0,3.2297740775,-1.6359907567,-0.3603493538  
 H,0,-3.6669096511,-2.4907230598,0.8859922402  
 H,0,-3.4761725298,-3.6990579171,-1.114752638  
 H,0,2.3674206775,0.4966150828,-2.1420287669  
 H,0,3.1830905191,4.6435123143,-1.4611741205  
 H,0,1.2487905956,4.7441636811,0.100083868  
 H,0,-1.1428811751,-4.4431884111,3.013485509  
 H,0,-1.7470120138,-4.6103862966,1.3420716943  
 H,0,1.153650664,-4.7087007114,2.3075629061  
 H,0,0.4260850614,-5.5461981336,0.9151738293  
 H,0,2.9240739484,-2.388137208,-3.8161155951  
 H,0,1.5892874738,-3.5236901721,-3.5001300643  
 H,0,1.4257541738,-0.6591151487,-4.5399500128  
 H,0,0.2771828525,-1.9930139444,-4.8101653761  
 H,0,-3.9639734093,4.4074743969,0.3136280686  
 H,0,-3.5494529819,3.9919680109,-1.9460222242  
 H,0,-5.8265425306,2.7641044999,-0.2223714833  
 H,0,-4.7774527469,1.4597888464,0.4008802046  
 H,0,-5.3327447793,-2.7522039543,1.4857143879  
 H,0,-4.5179346576,1.7016025862,-2.216193131  
 H,0,-2.8618814582,1.7622991541,-2.8721315992  
 H,0,-3.1528474969,1.0161780839,-1.2853168724  
 H,0,-5.3883935402,-0.7344461457,0.82306409  
 H,0,-5.2187500462,-0.5700726755,-0.9401640523  
 H,0,-5.8664497944,-2.0721794215,-0.2412872894  
 H,0,-4.7560001344,-2.2638124763,-2.7306460373  
 H,0,-3.4491883916,-1.0438718442,-2.6623153015  
 H,0,-3.1306628636,-2.6399397457,-3.3567870067  
 C,0,4.6995672201,3.4500417737,-3.0827743924  
 H,0,5.4486848823,3.1023880944,-3.8001961523  
 H,0,4.1223670522,4.2706259896,-3.5380899383  
 H,0,5.2140022584,3.8367411961,-2.188206327

Natural  
 Atom No Charge

-----  
 C 1 -0.24646  
 C 2 0.21581  
 N 3 -0.49138  
 C 4 0.07661  
 C 5 -0.27386  
 C 6 -0.19795  
 C 7 0.19519  
 N 8 -0.49548  
 C 9 0.08336  
 C 10 -0.24989

C 11 -0.20403  
 C 12 -0.24513  
 Ir 13 -0.02514  
 B 14 1.01502  
 O 15 -0.80561  
 C 16 -0.13951  
 C 17 -0.14019  
 O 18 -0.81237  
 C 19 -0.27611  
 C 20 -0.26647  
 C 21 0.31015  
 C 22 -0.34025  
 C 23 -0.24705  
 C 24 0.28632  
 O 25 -0.56346  
 O 26 -0.75724  
 B 27 1.36734  
 O 28 -0.77518  
 C 29 0.06467  
 C 30 -0.74261  
 B 31 0.93793  
 O 32 -0.77879  
 C 33 -0.14178  
 C 34 -0.14238  
 O 35 -0.78516  
 B 36 0.94922  
 O 37 -0.82952  
 C 38 0.06238  
 C 39 -0.72201  
 O 40 -0.80472  
 C 41 0.06468  
 C 42 -0.72889  
 O 43 -0.78107  
 C 44 0.06465  
 C 45 -0.72546  
 H 46 0.21114  
 H 47 0.27152  
 H 48 0.24550  
 H 49 0.26014  
 H 50 0.25431  
 H 51 0.24890  
 H 52 0.25604  
 H 53 0.26212  
 H 54 0.27939  
 H 55 0.22554  
 H 56 0.23221  
 H 57 0.24850  
 H 58 0.24898  
 H 59 0.24937  
 H 60 0.22786  
 H 61 0.21055  
 H 62 0.21174  
 H 63 0.22937  
 H 64 0.21083  
 H 65 0.22834  
 H 66 0.22748  
 H 67 0.21050  
 H 68 0.22483  
 H 69 0.23531  
 H 70 0.24705  
 H 71 0.25191  
 H 72 0.25572



H 73 0.23931  
 H 74 0.26683  
 H 75 0.25790  
 H 76 0.25045  
 H 77 0.24391  
 H 78 0.24995  
 H 79 0.23929  
 H 80 0.24840  
 H 81 0.25973  
 C 82 -0.33347  
 H 83 0.23551  
 H 84 0.21064  
 H 85 0.20817

### TS3-OBpin'anti M06/BS1

OBegleftantimetaOMeM06PS  
 M06/gen  
 E(RM06) = -2193.29319812

Zero-point correction= 0.676815 (Hartree/Particle)  
 Thermal correction to Energy= 0.721187  
 Thermal correction to Enthalpy= 0.722131  
 Thermal correction to Gibbs Free Energy= 0.598260  
 Sum of electronic and ZPE= -2192.616383  
 Sum of electronic and thermal Energies= -2192.572011  
 Sum of electronic and thermal Enthalpies= -2192.571067  
 Sum of electronic and thermal Free Energies= -2192.694938

| E             | CV        | S         |
|---------------|-----------|-----------|
| KCal/Mol      | Cal/Mol-K | Cal/Mol-K |
| Total 452.552 | 169.542   | 260.708   |

|    |          |          |          |
|----|----------|----------|----------|
| C  | 3.52785  | -0.44173 | 2.98803  |
| C  | 2.31424  | -0.38682 | 2.29983  |
| N  | 2.19639  | -0.93317 | 1.07229  |
| C  | 3.23827  | -1.55786 | 0.51249  |
| C  | 4.4707   | -1.64999 | 1.1462   |
| C  | 4.61621  | -1.07307 | 2.4021   |
| C  | 1.09118  | 0.21617  | 2.87585  |
| N  | -0.02488 | 0.10954  | 2.13372  |
| C  | -1.18575 | 0.55881  | 2.61249  |
| C  | -1.28906 | 1.17461  | 3.85324  |
| C  | -0.13791 | 1.32424  | 4.61529  |
| C  | 1.06629  | 0.83342  | 4.12755  |
| Ir | 0.25694  | -0.61537 | -0.02621 |
| B  | 0.67073  | -1.32159 | -1.88756 |
| O  | 0.07846  | -0.88065 | -3.068   |
| C  | 0.83486  | -1.36114 | -4.16591 |
| C  | 1.69028  | -2.48193 | -3.57457 |
| O  | 1.71963  | -2.1953  | -2.18324 |
| C  | 1.17154  | 1.32868  | -0.59632 |
| C  | 2.24253  | 1.27269  | -1.49391 |
| C  | 3.14903  | 2.32385  | -1.65122 |
| C  | 2.9938   | 3.49589  | -0.91401 |
| C  | 1.90764  | 3.59094  | -0.04559 |
| C  | 1.01273  | 2.54125  | 0.09551  |
| O  | 4.15532  | 2.105    | -2.54807 |
| O  | -0.05743 | 2.72906  | 0.95705  |
| B  | -1.24405 | 3.1205   | 0.43125  |
| O  | -1.41391 | 3.54554  | -0.86189 |
| C  | -2.82721 | 3.59367  | -1.08884 |
| C  | -3.22778 | 2.35081  | -1.8531  |

|   |          |          |          |
|---|----------|----------|----------|
| B | -0.24399 | -2.56345 | 0.65302  |
| O | 0.43811  | -3.72095 | 0.32577  |
| C | -0.0918  | -4.79059 | 1.09805  |
| C | -1.42036 | -4.24897 | 1.61904  |
| O | -1.25678 | -2.83821 | 1.57415  |
| B | -1.68431 | -1.12912 | -0.5156  |
| O | -2.82572 | -0.52399 | 0.02681  |
| C | -3.92229 | -1.41329 | -0.21589 |
| C | -5.2332  | -0.67313 | -0.28525 |
| O | -2.06603 | -2.19124 | -1.33442 |
| C | -3.48399 | -2.16655 | -1.47639 |
| C | -3.83635 | -1.50577 | -2.79367 |
| O | -2.39983 | 3.1299   | 1.17394  |
| C | -3.40465 | 3.72006  | 0.33899  |
| C | -4.73389 | 3.05739  | 0.59075  |
| H | -0.25968 | 0.67617  | -0.91419 |
| H | -2.04707 | 0.43299  | 1.95736  |
| H | 1.97214  | 0.93755  | 4.71738  |
| H | -2.25093 | 1.54785  | 4.19174  |
| H | -0.17278 | 1.81744  | 5.5838   |
| H | 3.62486  | -0.00098 | 3.97536  |
| H | 5.56669  | -1.11961 | 2.9283   |
| H | 5.293    | -2.16298 | 0.65643  |
| H | 3.05388  | -1.99014 | -0.47138 |
| H | -3.95035 | -2.13111 | 0.62335  |
| H | -3.8534  | -3.2027  | -1.45882 |
| H | 2.43068  | 0.38214  | -2.09352 |
| H | 3.67933  | 4.33258  | -1.01355 |
| H | 1.73501  | 4.50098  | 0.52605  |
| H | -1.65543 | -4.56742 | 2.64112  |
| H | -2.25949 | -4.52882 | 0.96116  |
| H | 0.60602  | -5.02793 | 1.91507  |
| H | -0.20319 | -5.68081 | 0.4688   |
| H | 2.71203  | -2.50256 | -3.97234 |
| H | 1.23725  | -3.47255 | -3.72655 |
| H | 1.45184  | -0.54074 | -4.56521 |
| H | 0.1636   | -1.70622 | -4.96162 |
| H | -3.46211 | 4.78947  | 0.60184  |
| H | -3.04842 | 4.49609  | -1.67502 |
| H | -5.50214 | 3.44506  | -0.08943 |
| H | -4.6468  | 1.97405  | 0.44874  |
| H | -5.06024 | 3.24381  | 1.6191   |
| H | -4.28616 | 2.3753   | -2.1433  |
| H | -2.61978 | 2.27468  | -2.76136 |
| H | -3.04693 | 1.45199  | -1.24629 |
| H | -5.44348 | -0.17857 | 0.66963  |
| H | -5.22234 | 0.08719  | -1.07502 |
| H | -6.05427 | -1.37132 | -0.49194 |
| H | -4.91735 | -1.51373 | -2.98098 |
| H | -3.4775  | -0.46798 | -2.80923 |
| H | -3.33714 | -2.03763 | -3.61022 |
| C | 5.09153  | 3.13364  | -2.74241 |
| H | 5.80622  | 2.768    | -3.4834  |
| H | 4.61608  | 4.04909  | -3.12501 |
| H | 5.63051  | 3.37345  | -1.81333 |

### TS3-OMeanti M06/BSsmall

OMeleftmetaOBegM06SB  
 M06/gen  
 E(RM06) = -2193.18032628

Zero-point correction= 0.680323 (Hartree/Particle)

Thermal correction to Energy= 0.724912  
 Thermal correction to Enthalpy= 0.725856  
 Thermal correction to Gibbs Free Energy= 0.600324  
 Sum of electronic and ZPE= -2192.500003  
 Sum of electronic and thermal Energies= -2192.455414  
 Sum of electronic and thermal Enthalpies= -2192.454470  
 Sum of electronic and thermal Free Energies= -2192.580003

E CV S  
 KCal/Mol Cal/Mol-K Cal/Mol-K  
 Total 454.889 168.996 264.206

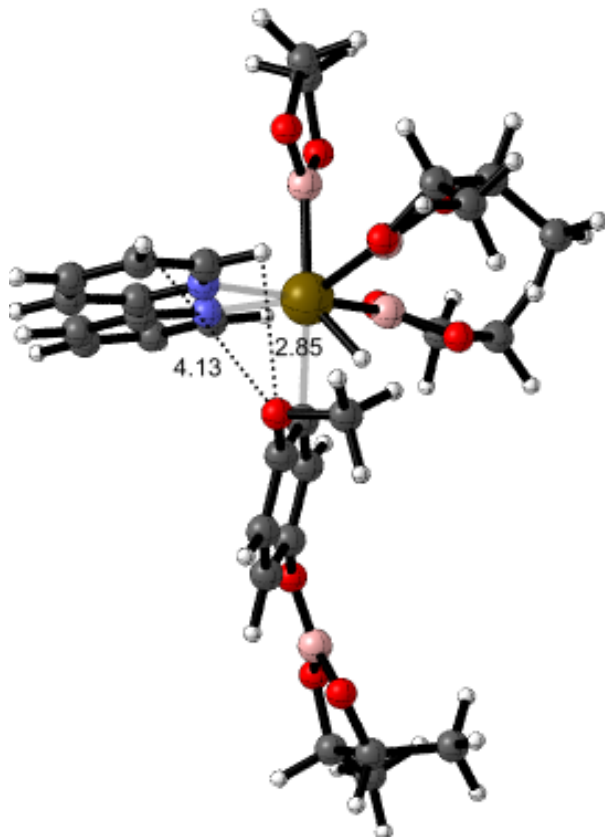

C,0,0.1350037065,3.9521785187,-2.0247472636  
 C,0,0.6320295662,2.8802586274,-1.2827690245  
 N,0,0.4322300422,1.6097705979,-1.6898525329  
 C,0,-0.2167112834,1.3745450672,-2.8364237057  
 C,0,-0.7278956633,2.3973701198,-3.6231808553  
 C,0,-0.5568388559,3.7085639664,-3.2013167176  
 C,0,1.4333112059,3.0649709536,-0.0537637292  
 N,0,1.8658400457,1.9434036159,0.5481338894  
 C,0,2.64605194,2.0341776383,1.6266508773  
 C,0,3.0305898306,3.2540291534,2.1666970173  
 C,0,2.5740000423,4.4191755886,1.5658906332  
 C,0,1.7680216624,4.3266351824,0.4415730055  
 Ir,0,1.078892252,-0.0530044932,-0.3156286583  
 B,0,0.3140025812,-1.6807475583,-1.2541496525  
 O,0,-0.0464597142,-2.8692332877,-0.6253082288  
 C,0,-0.5113503982,-3.7774861939,-1.6035363552  
 C,0,-0.8390913405,-2.8971161035,-2.8095025576  
 O,0,-0.0907894271,-1.7131786009,-2.5905479048  
 C,0,-0.8215318789,0.2674045179,0.7953206497  
 C,0,-2.0219202518,0.1005268496,0.0932900507

C,0,-3.2360726228,0.5462220175,0.6064807567  
 C,0,-3.2987837371,1.1590454337,1.8546762795  
 C,0,-2.1245706933,1.2965953812,2.5832732013  
 C,0,-0.9098295615,0.8530493656,2.0655274157  
 O,0,-4.3421767608,0.4040964488,-0.1976170765  
 B,0,-5.5872074828,0.0695228773,0.2111761407  
 O,0,-5.9730235708,-0.1958040418,1.5031451732  
 C,0,-7.3009799598,-0.7242696162,1.4242887782  
 C,0,-7.2338041952,-2.2307401879,1.5449405264  
 O,0,0.2210652035,1.0128089397,2.8416936486  
 B,0,2.8448463717,-0.2389572339,-1.4664358679  
 O,0,2.9335940172,-0.7042654419,-2.7652741989  
 C,0,4.2779268473,-0.5822217476,-3.1995318129  
 C,0,5.0702260667,-0.3505102956,-1.9138215624  
 O,0,4.1060015115,0.1319602474,-0.9933524976  
 B,0,2.4047735416,-1.3501694255,0.5713783075  
 O,0,2.9420456896,-1.1005451322,1.8358784424  
 C,0,3.9937802723,-2.0406194747,2.0487258864  
 C,0,4.118131785,-2.3540888167,3.5187949849  
 O,0,2.9295415639,-2.5302510423,0.0575206862  
 C,0,3.6166821266,-3.1969995956,1.1131426995  
 C,0,2.6909916319,-4.2363729841,1.7115861415  
 O,0,-6.6098837847,-0.0375074456,-0.6985747763  
 C,0,-7.8042552271,-0.1922237517,0.0669617718  
 C,0,-8.7974886007,-1.0453969996,-0.6801535762  
 H,0,0.344000105,-0.8195012334,0.9337408212  
 H,0,2.9608164328,1.0838237045,2.0566865733  
 H,0,1.4125894113,5.2315117575,-0.0437598576  
 H,0,3.6698734702,3.2811980633,3.0455563648  
 H,0,2.8457871161,5.395384526,1.9632407186  
 H,0,0.2863983012,4.9742452424,-1.6890986673  
 H,0,-0.9515889934,4.5379140638,-3.7851072367  
 H,0,-1.2522006801,2.1597436207,-4.5451233919  
 H,0,-0.3132125448,0.3237502923,-3.1104880616  
 H,0,4.9315213458,-1.5840077109,1.681417791  
 H,0,4.5151392243,-3.6783711857,0.6988151811  
 H,0,-2.0374393412,-0.3739165719,-0.8900103775  
 H,0,-4.2515888415,1.5011308176,2.251267877  
 H,0,-2.1324009476,1.7573017646,3.5711888268  
 H,0,5.8826254649,0.3784232789,-2.0260042425  
 H,0,5.4976668424,-1.2894002993,-1.5232043522  
 H,0,4.3608800984,0.2678343245,-3.8949110725  
 H,0,4.5800346113,-1.4912942691,-3.7339672073  
 H,0,-1.9116802338,-2.646556922,-2.8539975791  
 H,0,-0.5528905027,-3.3486109103,-3.767722346  
 H,0,-1.3819851713,-4.3264556382,-1.2225403351  
 H,0,0.2821170793,-4.5070075748,-1.8309156399  
 H,0,-7.8883502761,-0.3022085297,2.2519819066  
 H,0,-8.2319965403,0.8137742925,0.2230952868  
 H,0,4.3791434538,-1.4475300381,4.0782663665  
 H,0,3.1684327368,-2.7334010991,3.9169738372  
 H,0,4.8986285316,-3.104813098,3.7010400124  
 H,0,3.1907902319,-4.8424079188,2.4790052789  
 H,0,1.8091237787,-3.753899347,2.158086744  
 H,0,2.3318995812,-4.9003931953,0.9169367812  
 H,0,-8.2338969359,-2.6821327312,1.56204412  
 H,0,-6.6715546484,-2.6606247119,0.7044442225  
 H,0,-6.7141090425,-2.5020561992,2.4706185886  
 H,0,-9.7185576215,-1.1787422716,-0.097679456  
 H,0,-9.0587407209,-0.5662066795,-1.6302987924  
 H,0,-8.377981328,-2.0333085814,-0.9049672067  
 C,0,0.4556152675,-0.0696025032,3.7133749556

H,0,1.3800349812,0.1483616948,4.2607378143  
 H,0,-0.3745900026,-0.192873577,4.4286449396  
 H,0,0.5994438126,-1.0123082851,3.1600454055

Natural  
 Atom No Charge

-----  
 C 1 -0.24506  
 C 2 0.20934  
 N 3 -0.49068  
 C 4 0.07025  
 C 5 -0.27175  
 C 6 -0.19725  
 C 7 0.20317  
 N 8 -0.49267  
 C 9 0.08546  
 C 10 -0.27154  
 C 11 -0.20119  
 C 12 -0.24587  
 Ir 13 -0.01380  
 B 14 1.02034  
 O 15 -0.80426  
 C 16 -0.13931  
 C 17 -0.14001  
 O 18 -0.81375  
 C 19 -0.28572  
 C 20 -0.27053  
 C 21 0.31916  
 C 22 -0.30656  
 C 23 -0.26173  
 C 24 0.27756  
 O 25 -0.73960  
 B 26 1.36437  
 O 27 -0.78529  
 C 28 0.06148  
 C 29 -0.73800  
 O 30 -0.61056  
 B 31 0.91988  
 O 32 -0.77739  
 C 33 -0.14375  
 C 34 -0.14243  
 O 35 -0.78760  
 B 36 0.95018  
 O 37 -0.82101  
 C 38 0.06262  
 C 39 -0.72356  
 O 40 -0.79617  
 C 41 0.06315  
 C 42 -0.73021  
 O 43 -0.77113  
 C 44 0.05978  
 C 45 -0.72887  
 H 46 0.21838  
 H 47 0.26997  
 H 48 0.24609  
 H 49 0.25839  
 H 50 0.25445  
 H 51 0.24889  
 H 52 0.25633  
 H 53 0.26295  
 H 54 0.28001  
 H 55 0.22215

H 56 0.23251  
 H 57 0.24622  
 H 58 0.26164  
 H 59 0.25123  
 H 60 0.21309  
 H 61 0.22314  
 H 62 0.22567  
 H 63 0.21808  
 H 64 0.21130  
 H 65 0.22824  
 H 66 0.22580  
 H 67 0.21240  
 H 68 0.23867  
 H 69 0.22701  
 H 70 0.25390  
 H 71 0.24896  
 H 72 0.24544  
 H 73 0.23968  
 H 74 0.24997  
 H 75 0.26006  
 H 76 0.24859  
 H 77 0.24762  
 H 78 0.26491  
 H 79 0.24804  
 H 80 0.26317  
 H 81 0.25064  
 C 82 -0.30788  
 H 83 0.22626  
 H 84 0.19996  
 H 85 0.20860

### TS3-OMe<sub>anti</sub> M06/BS1

OMeleftmetaOBegM06PS

M06/gen

E(RM06) = -2193.28495198

Zero-point correction= 0.676488 (Hartree/Particle)

Thermal correction to Energy= 0.721357

Thermal correction to Enthalpy= 0.722302

Thermal correction to Gibbs Free Energy= 0.595063

Sum of electronic and ZPE= -2192.608464

Sum of electronic and thermal Enthalpies= -2192.563595

Sum of electronic and thermal Enthalpies= -2192.562650

Sum of electronic and thermal Free Energies= -2192.689889

E CV S  
 KCal/Mol Cal/Mol-K Cal/Mol-K  
 Total 452.659 169.934 267.795

|    |          |         |          |
|----|----------|---------|----------|
| C  | 0.25942  | 4.36579 | -0.88391 |
| C  | 0.72454  | 3.12581 | -0.44183 |
| N  | 0.52873  | 2.01339 | -1.17944 |
| C  | -0.08343 | 2.10286 | -2.36705 |
| C  | -0.56373 | 3.30665 | -2.86539 |
| C  | -0.39797 | 4.45573 | -2.1024  |
| C  | 1.48874  | 2.96302 | 0.81432  |
| N  | 1.90429  | 1.71658 | 1.10061  |
| C  | 2.65728  | 1.5062  | 2.18275  |
| C  | 3.02719  | 2.53139 | 3.04377  |
| C  | 2.58228  | 3.81934 | 2.77294  |
| C  | 1.80569  | 4.04094 | 1.64475  |
| Ir | 1.11316  | 0.03486 | -0.27628 |

|   |          |          |          |
|---|----------|----------|----------|
| B | 0.35212  | -1.27232 | -1.63187 |
| O | -0.04762 | -2.57644 | -1.35151 |
| C | -0.46142 | -3.19181 | -2.55836 |
| C | -0.75565 | -2.01828 | -3.49127 |
| O | -0.00199 | -0.94505 | -2.94355 |
| C | -0.80931 | 0.09313  | 0.84431  |
| C | -1.99376 | 0.13772  | 0.09635  |
| C | -3.2142  | 0.46517  | 0.6783   |
| C | -3.30366 | 0.74089  | 2.04018  |
| C | -2.1466  | 0.66259  | 2.80678  |
| C | -0.92482 | 0.33592  | 2.22035  |
| O | -4.29997 | 0.56037  | -0.16225 |
| B | -5.56119 | 0.15298  | 0.10524  |
| O | -5.99624 | -0.43244 | 1.27143  |
| C | -7.32608 | -0.90784 | 1.01513  |
| C | -7.2725  | -2.39546 | 0.74599  |
| O | 0.18672  | 0.26957  | 3.03801  |
| B | 2.91318  | 0.11262  | -1.39505 |
| O | 3.03897  | 0.00184  | -2.76797 |
| C | 4.40009  | 0.21413  | -3.11763 |
| C | 5.15285  | 0.06461  | -1.797   |
| O | 4.16464  | 0.31338  | -0.80673 |
| B | 2.36737  | -1.49497 | 0.28732  |
| O | 2.87741  | -1.59375 | 1.58372  |
| C | 3.89616  | -2.59584 | 1.57234  |
| C | 3.97466  | -3.27471 | 2.91674  |
| O | 2.86814  | -2.52759 | -0.49683 |
| C | 3.51074  | -3.46462 | 0.36687  |
| C | 2.54466  | -4.59394 | 0.6628   |
| O | -6.55454 | 0.29586  | -0.834   |
| C | -7.77881 | -0.03285 | -0.1712  |
| C | -8.75547 | -0.64366 | -1.14257 |
| H | 0.32783  | -1.00684 | 0.70101  |
| H | 2.96094  | 0.47397  | 2.3496   |
| H | 1.45735  | 5.04365  | 1.41744  |
| H | 3.64361  | 2.31442  | 3.91129  |
| H | 2.83957  | 4.64721  | 3.42931  |
| H | 0.40914  | 5.25784  | -0.28405 |
| H | -0.76885 | 5.41558  | -2.45355 |
| H | -1.0594  | 3.33133  | -3.83125 |
| H | -0.17718 | 1.16689  | -2.91696 |
| H | 4.85443  | -2.09259 | 1.34885  |
| H | 4.4065   | -3.85011 | -0.14141 |
| H | -1.99259 | -0.06951 | -0.97448 |
| H | -4.26045 | 0.99154  | 2.49004  |
| H | -2.17426 | 0.8587   | 3.87771  |
| H | 5.98326  | 0.77119  | -1.68382 |
| H | 5.54119  | -0.95802 | -1.66231 |
| H | 4.51137  | 1.22195  | -3.54506 |
| H | 4.70575  | -0.51722 | -3.87454 |
| H | -1.82363 | -1.74924 | -3.48637 |
| H | -0.44737 | -2.19749 | -4.52785 |
| H | -1.33601 | -3.82686 | -2.37417 |
| H | 0.35477  | -3.82427 | -2.93999 |
| H | -7.93698 | -0.70391 | 1.90463  |
| H | -8.19903 | 0.90551  | 0.22882  |
| H | 4.25322  | -2.55033 | 3.68995  |
| H | 3.00546  | -3.70729 | 3.19182  |
| H | 4.72577  | -4.07438 | 2.91137  |
| H | 3.01032  | -5.38677 | 1.26109  |
| H | 1.66225  | -4.21588 | 1.19744  |
| H | 2.19478  | -5.02536 | -0.28062 |

|   |          |          |          |
|---|----------|----------|----------|
| H | -8.27581 | -2.81581 | 0.61053  |
| H | -6.68126 | -2.60683 | -0.1541  |
| H | -6.79554 | -2.90316 | 1.59008  |
| H | -9.69101 | -0.91393 | -0.63783 |
| H | -8.9886  | 0.07389  | -1.93532 |
| H | -8.33655 | -1.54098 | -1.61094 |
| C | 0.38649  | -1.00342 | 3.61846  |
| H | 1.29733  | -0.94393 | 4.22374  |
| H | -0.46359 | -1.2852  | 4.25931  |
| H | 0.53656  | -1.77637 | 2.8481   |

### TS3-OBpin<sub>syn</sub> M06/BSsmall

OBegleftsynmetaOMeM06SB

M06/gen

E(RM06) = -2193.18274050

Zero-point correction= 0.681553 (Hartree/Particle)

Thermal correction to Energy= 0.725715

Thermal correction to Enthalpy= 0.726659

Thermal correction to Gibbs Free Energy= 0.603579

Sum of electronic and ZPE= -2192.501187

Sum of electronic and thermal Energies= -2192.457026

Sum of electronic and thermal Enthalpies= -2192.456082

Sum of electronic and thermal Free Energies= -2192.579162

| E             | CV        | S         |
|---------------|-----------|-----------|
| KCal/Mol      | Cal/Mol-K | Cal/Mol-K |
| Total 455.393 | 168.455   | 259.044   |

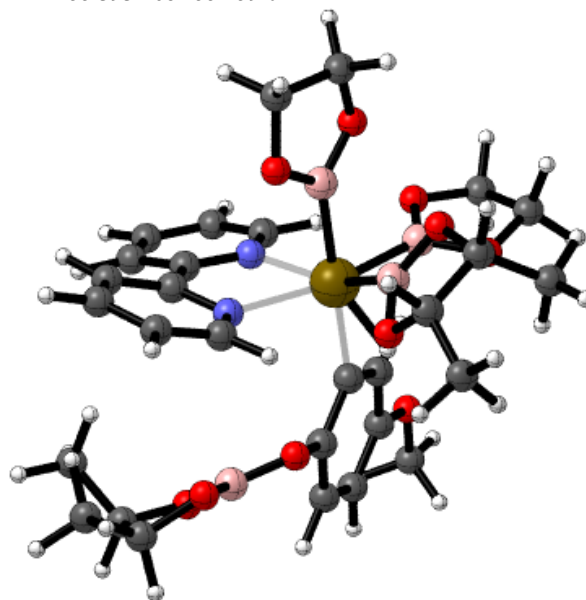

|                                              |
|----------------------------------------------|
| C,0,-1.9371764833,0.8726555481,3.5723254207  |
| C,0,-1.2119773504,0.2968032091,2.5300470881  |
| N,0,-0.0883935347,0.8736659486,2.0559265617  |
| C,0,0.3612136411,1.9975253131,2.6274752422   |
| C,0,-0.301594063,2.6116420554,3.681843972    |
| C,0,-1.4787613652,2.0458860699,4.1528286933  |
| C,0,-1.6276103723,-0.9659717072,1.8924837321 |
| N,0,-1.1157993623,-1.2095151257,0.6729906071 |
| C,0,-1.4611233017,-2.3288340647,0.0340149622 |
| C,0,-2.3131441678,-3.2743304099,0.5930320634 |
| C,0,-2.8122320014,-3.0505881388,1.8688655437 |

C,0,-2.4695110899,-1.877388031,2.5288045272  
 Ir,0,0.8124757461,0.0086174257,0.179568634  
 B,0,2.5838263409,0.9790406313,0.0831000963  
 O,0,3.4415221986,1.016126597,-1.0075740401  
 C,0,4.5960686627,1.7485825844,-0.6467072554  
 C,0,4.1642980508,2.5508219931,0.5804325713  
 O,0,3.0409240454,1.8444606253,1.0814985735  
 C,0,-0.1841498541,1.6523320326,-0.9376682403  
 C,0,0.3333764476,2.9424011973,-0.7929805062  
 C,0,-0.3260227974,4.0736744263,-1.2786900702  
 C,0,-1.5260518635,3.9309102222,-1.9691110936  
 C,0,-2.0463486391,2.6522899503,-2.1501835511  
 C,0,-1.3936240373,1.5387812543,-1.6382335448  
 O,0,0.2873860503,5.2680629959,-1.0360262706  
 O,0,-1.903244475,0.2765711163,-1.8848967873  
 B,0,-3.1793487326,-0.057963546,-1.6004780935  
 O,0,-4.1247779914,0.7862698731,-1.0637589948  
 C,0,-5.2634595848,-0.0142370863,-0.7512977138  
 C,0,-5.2817347584,-0.2634165717,0.7407702707  
 B,0,1.8230448978,-1.3920154677,1.4055325636  
 O,0,3.0425529219,-1.1843471506,2.0259724891  
 C,0,3.4855578122,-2.4228737965,2.5512439007  
 C,0,2.2205035654,-3.277972363,2.625587469  
 O,0,1.3206320751,-2.6532621451,1.7227818675  
 B,0,1.6876812848,-1.4320011356,-1.0148368224  
 O,0,0.9618350786,-2.1001319625,-2.0000603721  
 C,0,1.779296857,-3.156192585,-2.5047391257  
 C,0,1.4879623103,-3.3910671048,-3.9656179124  
 O,0,2.9872696892,-1.917028597,-0.9695048359  
 C,0,3.2006462943,-2.7044951552,-2.138606313  
 C,0,3.900674683,-1.8478229356,-3.1733131751  
 O,0,-3.659489163,-1.3254483019,-1.8400872504  
 C,0,-5.0692445372,-1.2670124747,-1.6344517182  
 C,0,-5.57148449,-2.5767377317,-1.0806597072  
 H,0,0.7558533086,0.419258734,-1.4051236286  
 H,0,-1.0172469029,-2.4611109051,-0.9522726342  
 H,0,-2.8329222434,-1.6829554053,3.535426706  
 H,0,-2.5682317296,-4.1698038717,0.0310467167  
 H,0,-3.4621534303,-3.7801383659,2.3493665679  
 H,0,-2.8659672962,0.4156750947,3.9062969707  
 H,0,-2.0364525814,2.5131545724,4.9621766649  
 H,0,0.1012305896,3.5253921621,4.1112896579  
 H,0,1.2929572042,2.3905318618,2.2204063494  
 H,0,1.5412651405,-4.0681918229,-1.9275146143  
 H,0,3.8293522269,-3.5666144302,-1.8703872932  
 H,0,1.282250609,3.1119764092,-0.2818224157  
 H,0,-2.0562535409,4.7872672803,-2.3782787989  
 H,0,-2.9774964054,2.5200703443,-2.6983469065  
 H,0,1.7796768877,-3.2799793104,3.6348586184  
 H,0,2.3864334871,-4.3204100613,2.3252178349  
 H,0,3.9625648402,-2.2690215425,3.5275607353  
 H,0,4.2308553369,-2.8548744361,1.8650521611  
 H,0,3.8575790538,3.5752626222,0.3112770187  
 H,0,4.9405754183,2.6161367726,1.3529288243  
 H,0,4.9155755781,2.3816458628,-1.4842010108  
 H,0,5.412476731,1.0473240441,-0.4124897729  
 H,0,-6.1662822349,0.536910931,-1.0524003971  
 H,0,-5.5416500565,-1.0822431801,-2.6151116991  
 H,0,-6.6583062759,-2.5498718597,-0.9275681687  
 H,0,-5.3439497456,-3.3880657605,-1.781940978  
 H,0,-5.0857575495,-2.8085857521,-0.1246074748  
 H,0,-6.1769324729,-0.8156282354,1.0548597412

H,0,-4.3926507112,-0.835144366,1.0429581461  
 H,0,-5.2606093688,0.6973153564,1.268877419  
 H,0,0.4416216598,-3.6891439974,-4.0995336164  
 H,0,1.6529572046,-2.4762673074,-4.5473623156  
 H,0,2.1271638283,-4.186231485,-4.3726777133  
 H,0,4.1573608262,-2.4190446696,-4.0753104454  
 H,0,3.2702762683,-0.9933029717,-3.4565740727  
 H,0,4.8215734075,-1.4409438762,-2.7392279068  
 C,0,-0.335204604,6.4220819448,-1.5280829899  
 H,0,0.2960202356,7.2674475373,-1.2389702513  
 H,0,-0.426075284,6.4019857507,-2.6258739611  
 H,0,-1.3394909132,6.5607488518,-1.095835761

### TS3-OBpin<sub>syn</sub> M06/BS1

OBegleftsynmetaOMeM06PS

M06/gen

E(RM06) = -2193.28699673

Zero-point correction= 0.677046 (Hartree/Particle)

Thermal correction to Energy= 0.721590

Thermal correction to Enthalpy= 0.722534

Thermal correction to Gibbs Free Energy= 0.598428

Sum of electronic and ZPE= -2192.609951

Sum of electronic and thermal Energies= -2192.565407

Sum of electronic and thermal Enthalpies= -2192.564463

Sum of electronic and thermal Free Energies= -2192.688569

| E        | CV        | S               |
|----------|-----------|-----------------|
| KCal/Mol | Cal/Mol-K | Cal/Mol-K       |
| Total    | 452.805   | 169.793 261.203 |

C,0,-2.1172927325,0.7460120366,3.4172143456  
 C,0,-1.3246651789,0.1933950911,2.4098566473  
 N,0,-0.2094535381,0.8191202329,1.9773583305  
 C,0,0.1535296281,1.9772375874,2.5433435662  
 C,0,-0.5847723294,2.5761900929,3.5555802059  
 C,0,-1.745973402,1.9518862936,3.9943535183  
 C,0,-1.6547714133,-1.0903744413,1.7616235462  
 N,0,-1.0655232311,-1.3208230571,0.5754699288  
 C,0,-2.1417907932,-3.4509848111,0.4619274308  
 C,0,-2.730243614,-3.2345100863,1.7011388502  
 C,0,-2.4930614539,-2.0343216979,2.3586862898  
 Ir,0,0.8192535401,0.0024363882,0.1501779479  
 B,0,2.5715726953,1.0132177663,0.191071887  
 O,0,3.5451368904,1.0383046592,-0.7968148191  
 C,0,4.6729853198,1.7319915739,-0.2900702826  
 C,0,4.1105123231,2.5681664539,0.856988646  
 O,0,2.9198251097,1.8861516166,1.2275890352  
 C,0,-0.1757910802,1.6372202678,-0.9856158349  
 C,0,0.3815481602,2.9186054212,-0.9364485256  
 C,0,-0.2678874704,4.0422772941,-1.4520466385  
 C,0,-1.5026509474,3.9008371592,-2.0794800573  
 C,0,-2.0676873122,2.6288974406,-2.1628154967  
 C,0,-1.4226345359,1.5249563619,-1.6201810693  
 O,0,0.3911636303,5.230151736,-1.3053712077  
 O,0,-1.9861657002,0.2688121406,-1.7601221272  
 B,0,-3.2621991572,-0.0154182654,-1.4272603294  
 O,0,-4.1898993054,0.8805221026,-0.9403230377  
 C,0,-5.3401919909,0.1261201351,-0.5488871235  
 C,0,-5.3624876102,0.0183009315,0.9603324565

B,0,1.8647449685,-1.403166961,1.3557219845  
 O,0,3.1063455188,-1.2156810861,1.9413147014  
 C,0,3.5619577741,-2.468237009,2.4291602811  
 C,0,2.2949736854,-3.3179922141,2.5294021166  
 O,0,1.3702689954,-2.6710165792,1.6632977737  
 B,0,1.7433156374,-1.3725626693,-1.0904470655  
 O,0,1.0364390744,-2.007698484,-2.1117715144  
 C,0,1.8440434043,-3.0820759763,-2.5987173754  
 C,0,1.5797143147,-3.3164189795,-4.0645149425  
 O,0,3.0381411172,-1.8666001688,-1.033508143  
 C,0,3.2652807493,-2.6594627946,-2.1988681426  
 C,0,4.0149551163,-1.8263027718,-3.217991615  
 O,0,-3.7648026769,-1.2912534553,-1.5503249227  
 C,0,-5.1707073097,-1.2047515522,-1.3171202001  
 C,0,-5.6655411483,-2.4544564386,-0.6332984894  
 H,0,0.832791435,0.4295717951,-1.4171912137  
 H,0,-0.8179481379,-2.5814550589,-1.0258155926  
 H,0,-2.9291038092,-1.8478960901,3.3367359407  
 H,0,-2.3139555668,-4.3670905455,-0.0958435385  
 H,0,-3.3677999593,-3.9902976855,2.1549201417  
 H,0,-3.0297982585,0.2446344662,3.7289475472  
 H,0,-2.3597356967,2.3987530485,4.7727003114  
 H,0,-0.2501064561,3.5179560119,3.980225459  
 H,0,1.0777227467,2.4110968497,2.1668302918  
 H,0,1.575690863,-3.9863447497,-2.0219734448  
 H,0,3.8651384705,-3.5349160216,-1.910504156  
 H,0,1.3601863814,3.0874152496,-0.487162532  
 H,0,-2.0285831157,4.7476412992,-2.510787028  
 H,0,-3.028707722,2.4983012012,-2.6550921762  
 H,0,1.8833973937,-3.3341653548,3.5497888901  
 H,0,2.4437542836,-4.3541028318,2.2027628504  
 H,0,4.0692785292,-2.3313971916,3.3914250125  
 H,0,4.2806968373,-2.8890881522,1.7102028946  
 H,0,3.8555836172,3.5902383084,0.5343596253  
 H,0,4.7850457579,2.6325167861,1.7187200584  
 H,0,5.1285365747,2.3364775071,-1.0830261067  
 H,0,5.4142290925,0.9997132364,0.0650341501  
 H,0,-6.2337232035,0.6613782311,-0.8987487754  
 H,0,-5.6631191848,-1.1077916072,-2.299447601  
 H,0,-6.7476610588,-2.4055909234,-0.4614184865  
 H,0,-5.4565502093,-3.3274009021,-1.2606521738  
 H,0,-5.1603744036,-2.60081145,0.3292975376  
 H,0,-6.2691098571,-0.4836363411,1.3185622405  
 H,0,-4.4870623803,-0.5407313108,1.3182029628  
 H,0,-5.3254640483,1.0229900147,1.3944087361  
 H,0,0.5356630433,-3.6083330828,-4.2179588914  
 H,0,1.7620865807,-2.4041974787,-4.6432410366  
 H,0,2.2220369843,-4.115591864,-4.4552673018  
 H,0,4.2786324816,-2.4114333479,-4.1076498567  
 H,0,3.416538227,-0.959479839,-3.5268713487  
 H,0,4.9363242169,-1.4460503864,-2.7650772824  
 C,0,-0.2135205119,6.3793495933,-1.8400391351  
 H,0,0.4585380547,7.2140958935,-1.6274389191  
 H,0,-0.3497094413,6.2967796065,-2.9287303556  
 H,0,-1.1905591713,6.5778681921,-1.3737433707

### TS3-OMe Conformer B M06/BSsmall

OMerightmetaOBegM06SBb

M06/gen

E(RM06) = -2193.17982496

Zero-point correction= 0.680847 (Hartree/Particle)  
 Thermal correction to Energy= 0.725458  
 Thermal correction to Enthalpy= 0.726402  
 Thermal correction to Gibbs Free Energy= 0.599436  
 Sum of electronic and ZPE= -2192.498978  
 Sum of electronic and thermal Energies= -2192.454367  
 Sum of electronic and thermal Enthalpies= -2192.453423  
 Sum of electronic and thermal Free Energies= -2192.580389

| E        | CV        | S               |
|----------|-----------|-----------------|
| KCal/Mol | Cal/Mol-K | Cal/Mol-K       |
| Total    | 455.231   | 168.824 267.222 |

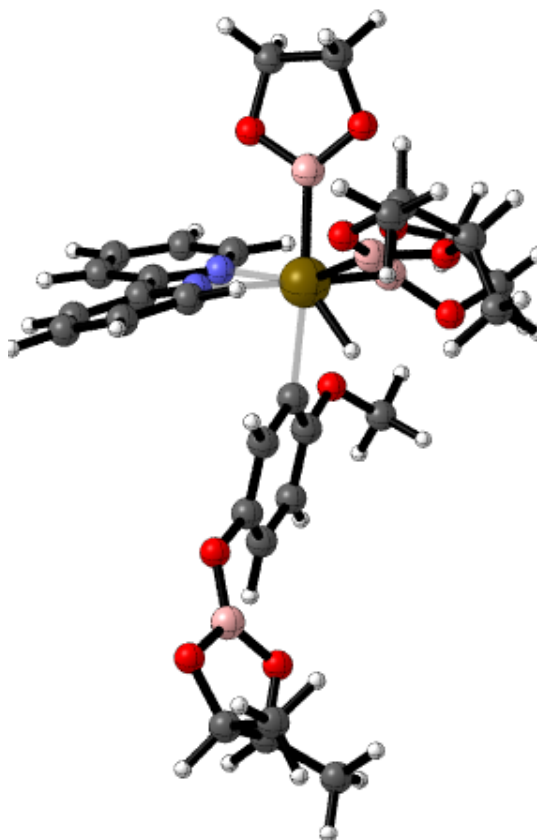

C,0,1.4628911864,-3.7854332846,-2.221047007  
 C,0,1.2190755196,-2.4879756268,-1.768441026  
 N,0,1.6803437954,-2.074290212,-0.5730753639  
 C,0,2.3968575101,-2.9104771621,0.1839191809  
 C,0,2.6726185926,-4.2137299958,-0.2041456833  
 C,0,2.1914946387,-4.6583648925,-1.4282148817  
 C,0,0.4952806855,-1.4912460736,-2.5860458473  
 N,0,0.5388825524,-0.2183818887,-2.1524802498  
 C,0,-0.0342050774,0.7437631408,-2.8798007869  
 C,0,-0.7200986993,0.4809294424,-4.0591060312  
 C,0,-0.8129771685,-0.8353848172,-4.4900394311  
 C,0,-0.1906866504,-1.831828517,-3.7523905051  
 Ir,0,1.2211784857,0.0316035264,0.0498017853  
 B,0,1.9255026815,-0.0027853286,1.9504998608  
 O,0,1.3207906707,0.5471406554,3.0726342112  
 C,0,2.2224648665,0.4648513112,4.1554151917  
 C,0,3.2419592139,-0.5928447,3.725936671  
 O,0,3.1137534045,-0.6514867095,2.3168159728  
 C,0,-0.8282299371,-0.6697251799,0.5655027674  
 C,0,-1.018406071,-1.6345159693,1.5682215624

C,0,-2.271266562,-2.2036773946,1.7908735276  
 C,0,-3.3710224913,-1.8345101825,1.0232747885  
 C,0,-3.200787938,-0.8831299105,0.0265978867  
 C,0,-1.9495049075,-0.3143648618,-0.1891345025  
 O,0,0.0823366883,-2.0447875945,2.2818081871  
 O,0,-4.2208459298,-0.487079978,-0.8081058676  
 B,0,-5.5091838379,-0.2910512548,-0.4473803689  
 O,0,-6.0171930987,-0.3911984588,0.8256653865  
 C,0,-7.4356167864,-0.2677340932,0.699340252  
 C,0,-8.0110471685,0.4224576503,1.9094411497  
 B,0,3.2152708816,0.4783671023,-0.4908716524  
 O,0,3.9164243988,-0.3349597945,-1.3790450491  
 C,0,5.2549421724,0.1272984592,-1.4578324452  
 C,0,5.2067476807,1.5307454053,-0.8550992026  
 O,0,4.0133368445,1.545556755,-0.0929100892  
 B,0,1.3952846998,2.0820081344,0.1197853234  
 O,0,1.3080993885,2.857651065,-1.042991114  
 C,0,1.771840966,4.1647094746,-0.7082643028  
 C,0,1.108443333,5.2021614518,-1.5792579916  
 O,0,1.5921194141,2.8930327749,1.221768336  
 C,0,1.5202210337,4.251418552,0.8050889683  
 C,0,0.1737447104,4.8187799675,1.2063738171  
 O,0,-6.4492308233,0.0564642923,-1.3862198462  
 C,0,-7.6197341443,0.4350680692,-0.6619513329  
 C,0,-7.6893846019,1.9461560035,-0.6026877407  
 H,0,-0.0295681847,0.704971807,0.8571658437  
 H,0,0.0739166575,1.7527222467,-2.4811153583  
 H,0,-0.2594102592,-2.8676354231,-4.0742932278  
 H,0,-1.1828369632,1.2941401155,-4.6124467258  
 H,0,-1.3649205032,-1.0883027513,-5.3931991349  
 H,0,1.1072879947,-4.1072767207,-3.196000611  
 H,0,2.3919219093,-5.6714870284,-1.7716369603  
 H,0,3.2620300893,-4.8579294581,0.4433312306  
 H,0,2.7652370962,-2.4958422197,1.1218588622  
 H,0,2.8627840626,4.1808307192,-0.8801476609  
 H,0,2.3266572266,4.8119171182,1.3009336743  
 H,0,-2.3969882866,-2.9637398981,2.560700242  
 H,0,-4.3490534517,-2.2734060135,1.2049048694  
 H,0,-1.8732824727,0.4492402555,-0.9661089476  
 H,0,5.1490811151,2.3101274082,-1.6320372874  
 H,0,6.065640446,1.7553166046,-0.2102618112  
 H,0,5.5928668373,0.1168655621,-2.5018933915  
 H,0,5.9064445299,-0.546206183,-0.8798303783  
 H,0,3.0190357849,-1.5838244656,4.1582337313  
 H,0,4.2735236026,-0.3337045625,3.9972253965  
 H,0,1.6854465841,0.1939041655,5.0754278766  
 H,0,2.694068,1.4474693363,4.3127803095  
 H,0,1.3621672127,5.0295435197,-2.6321700413  
 H,0,0.0164494621,5.1580802966,-1.4827574978  
 H,0,1.4406658491,6.2140239826,-1.3108547738  
 H,0,0.0939124057,5.8898573994,0.977330705  
 H,0,-0.6367072623,4.2872148338,0.6880491669  
 H,0,0.0273613881,4.6806273491,2.2836085877  
 H,0,-8.498190628,0.0365592427,-1.1894499876  
 H,0,-7.8510421724,-1.2877359574,0.6266703241  
 H,0,-9.099856889,0.5296501939,1.8179231366  
 H,0,-7.7982491429,-0.1627301461,2.8111301055  
 H,0,-7.5704925367,1.4177968071,2.0422442026  
 H,0,-8.6104429006,2.2937220366,-0.1177821116  
 H,0,-6.8302385726,2.3501392219,-0.0491270769  
 H,0,-7.6564212322,2.3536916544,-1.6192306398  
 C,0,-0.1082095948,-2.2775341258,3.6536086966

H,0,0.8878017252,-2.4096841992,4.0926365855  
 H,0,-0.6047087441,-1.4186799257,4.1308114198  
 H,0,-0.689146304,-3.1918400716,3.8521771502

### TS3-OM<sub>syn</sub> M06/BS1

OMerightmetaOBegM06PS

OMerightmetaOBeg

M06/gen

E(RM06) = -2193.28635803

Zero-point correction= 0.677703 (Hartree/Particle)

Thermal correction to Energy= 0.722240

Thermal correction to Enthalpy= 0.723185

Thermal correction to Gibbs Free Energy= 0.597612

Sum of electronic and ZPE= -2192.608655

Sum of electronic and thermal Energies= -2192.564118

Sum of electronic and thermal Enthalpies= -2192.563173

Sum of electronic and thermal Free Energies= -2192.688746

| E        | CV        | S               |
|----------|-----------|-----------------|
| KCal/Mol | Cal/Mol-K | Cal/Mol-K       |
| Total    | 453.213   | 169.542 264.289 |

C,0,441931,-3.483352,-2.593041  
 C,0,569712,-2.219001,-2.012722  
 N,1.304915,-2.037812,-0.899794  
 C,1.941635,-3.078836,-0.351353  
 C,1.84752,-4.363455,-0.868896  
 C,1.078883,-4.567769,-2.008924  
 C,-0.053175,-1.014903,-2.602687  
 N,0.337962,0.168807,-2.094312  
 C,-0.144866,1.298631,-2.620387  
 C,-1.075795,1.305149,-3.653109  
 C,-1.523234,0.08748,-4.15011  
 C,-0.997864,-1.08649,-3.627976  
 Ir,1.342365,0.021732,0.008517  
 B,2.193419,-0.398287,1.805126  
 O,1.837814,0.151095,3.028325  
 C,2.406098,-0.638776,4.051962  
 C,3.548116,-1.383376,3.362119  
 O,3.180735,-1.380168,1.989194  
 C,-0.735637,-0.389684,0.697306  
 C,-0.979249,-1.51212,1.513585  
 C,-2.277024,-1.961409,1.749392  
 C,-3.375272,-1.302817,1.189936  
 C,-3.152812,-0.186258,0.397569  
 C,-1.850114,0.262629,0.175145  
 O,0.122805,-2.139778,2.026237  
 O,-4.149224,0.538924,-0.217417  
 B,-5.489138,0.409264,-0.121391  
 O,-6.180866,-0.464669,0.689051  
 C,-7.558306,-0.370193,0.302323  
 C,-8.455729,-0.600759,1.490228  
 B,3.348387,0.146697,-0.659894  
 O,3.938289,-0.899368,-1.371456  
 C,5.333954,-0.648709,-1.460511  
 C,5.460162,0.847328,-1.18977  
 O,4.276572,1.166993,-0.472849  
 B,1.830157,2.000624,0.306581  
 O,1.610522,2.951516,-0.69566  
 C,2.318562,4.133472,-0.31423

C,1.645084,5.361788,-0.873062  
 O,2.366915,2.602992,1.427057  
 C,2.400609,4.012018,1.215487  
 C,1.260451,4.652152,1.981354  
 O,-6.316684,1.204994,-0.8798  
 C,-7.645057,1.006008,-0.38792  
 C,-8.015064,2.163418,0.514379  
 H,0.34055,0.78813,1.027782  
 H,0.235093,2.217943,-2.17519  
 H,-1.340451,-2.046632,-4.002109  
 H,-1.45147,2.248361,-4.03898  
 H,-2.27283,0.048404,-4.936553  
 H,-0.134401,-3.617955,-3.502977  
 H,0.986126,-5.55789,-2.448891  
 H,2.378177,-5.179689,-0.387184  
 H,2.541751,-2.850707,0.528519  
 H,3.338413,4.047501,-0.725603  
 H,3.363719,4.395287,1.582659  
 H,-2.459995,-2.835051,2.37019  
 H,-4.383085,-1.657342,1.380934  
 H,-1.732546,1.162926,-0.429547  
 H,5.487619,1.43354,-2.120787  
 H,6.339636,1.108945,-0.590038  
 H,5.704836,-0.946715,-2.448235  
 H,5.854028,-1.24633,-0.69643  
 H,3.670846,-2.415391,3.716146  
 H,4.509468,-0.861601,3.479142  
 H,1.64316,-1.335191,4.439382  
 H,2.741868,-0.001809,4.879028  
 H,1.658593,5.3352,-1.968026  
 H,0.600631,5.421832,-0.545975  
 H,2.164108,6.272913,-0.549717  
 H,1.282566,5.746592,1.909367  
 H,0.294325,4.29322,1.602747  
 H,1.329972,4.370607,3.036847  
 H,-8.326673,0.964564,-1.248334  
 H,-7.737644,-1.15378,-0.452471  
 H,-9.510331,-0.517411,1.200892  
 H,-8.291409,-1.603734,1.896437  
 H,-8.252257,0.125398,2.284721  
 H,-9.052419,2.090659,0.861062  
 H,-7.355658,2.200247,1.391132  
 H,-7.899025,3.103607,-0.033637  
 C,-0.049692,-3.308671,2.779816  
 H,0.95543,-3.648934,3.05208  
 H,-0.626676,-3.12387,3.69914  
 H,-0.548411,-4.098811,2.196411

### TS5-OBeganti M06/BSsmall

OBegleftantimetamFM06SB  
 M06/gen  
 E(RM06) = -2335.05183674

Zero-point correction= 0.753989 (Hartree/Particle)  
 Thermal correction to Energy= 0.801889  
 Thermal correction to Enthalpy= 0.802833  
 Thermal correction to Gibbs Free Energy= 0.671652  
 Sum of electronic and ZPE= -2334.297848  
 Sum of electronic and thermal Energies= -2334.249948  
 Sum of electronic and thermal Enthalpies= -2334.249004  
 Sum of electronic and thermal Free Energies= -2334.380184

E CV S  
 KCal/Mol Cal/Mol-K Cal/Mol-K  
 Total 503.193 183.507 276.093

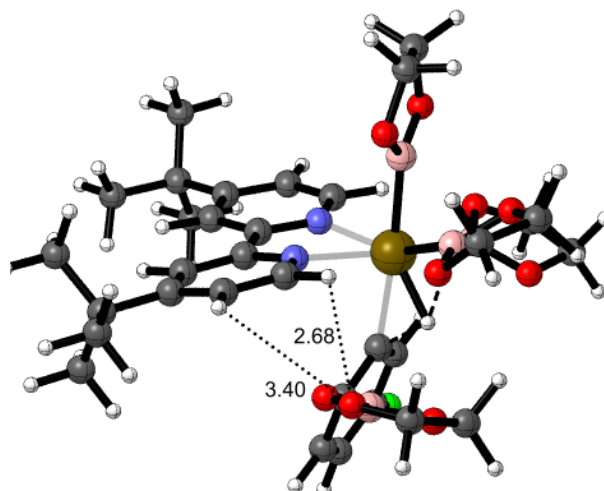

C,0,2.4882205871,-0.5833960495,3.4863387563  
 C,0,1.4708755934,-0.3563479925,2.5582308882  
 N,0,1.3957136511,-1.0726067019,1.4208943513  
 C,0,2.3074362671,-2.0269957264,1.196182081  
 C,0,3.3383897843,-2.2926083052,2.0802447458  
 C,0,3.4570395356,-1.5570623087,3.2633443447  
 C,0,0.3911427701,0.6285172553,2.7917434801  
 N,0,-0.6138104586,0.6198564805,1.8960914871  
 C,0,-1.6667182521,1.4031839916,2.1101608158  
 C,0,-1.754159566,2.2716554863,3.1906867295  
 C,0,-0.7048994109,2.3487073487,4.102176749  
 C,0,0.3748025125,1.4877315173,3.8850018556  
 Ir,0,-0.1721018927,-0.4986024731,-0.0855457346  
 B,0,0.3811955957,-1.6061521515,-1.6945357983  
 O,0,0.0884537048,-1.3084328389,-3.0190933483  
 C,0,0.622623656,-2.3274175773,-3.8414359374  
 C,0,1.6626278374,-3.0142108966,-2.9582184924  
 O,0,1.2639309046,-2.6886001185,-1.6365404019  
 C,0,1.2531379732,1.1032669029,-0.6748029831  
 C,0,2.4712558331,0.6843808376,-1.228024404  
 C,0,3.5417859115,1.5557477432,-1.341380413  
 C,0,3.4583732317,2.879394433,-0.9431927793  
 C,0,2.2486644328,3.3243125843,-0.4259690457  
 C,0,1.168942559,2.4535689913,-0.3081836698  
 F,0,4.6988791148,1.1007336913,-1.8495172386  
 O,0,0.0063091341,2.9785199392,0.2229007878  
 B,0,-1.0917892705,3.161943271,-0.5515425342  
 O,0,-1.1428436582,2.9393762256,-1.9014159059  
 C,0,-2.4819898175,3.1539342893,-2.3114020428  
 C,0,-3.1838421319,3.7678547142,-1.0819765917  
 O,0,-2.2605003395,3.6395966925,-0.0154753708  
 B,0,-1.3431552376,-2.1141975935,0.6145882779  
 O,0,-1.0015232475,-3.4521177744,0.5371327638  
 C,0,-1.9892152445,-4.212349028,1.2143141646  
 C,0,-3.1594179059,-3.244946594,1.3806708229  
 O,0,-2.5685886992,-1.9611708158,1.2685820277  
 B,0,-2.044482374,-0.4653113492,-0.9356636061  
 O,0,-2.9733625609,0.5506275604,-0.6666464361  
 C,0,-4.249840163,0.0675140727,-1.055787118  
 C,0,-3.9310853602,-1.0053069464,-2.0895858538



O,0,-2.6291055198,-1.4352654596,-1.7416517688  
H,0,-0.1841402114,0.6611414192,-1.2586512465  
H,0,-2.4560342563,1.3439715263,1.3625501668  
H,0,1.2169709776,1.49920521,4.5737457204  
H,0,-2.6355782388,2.9007899198,3.2780733345  
C,0,-0.695239987,3.3043538078,5.2880397464  
H,0,2.5100205595,0.003850669,4.3988382783  
C,0,4.592409912,-1.8416685112,4.2376958392  
H,0,4.0461883079,-3.0816740351,1.832901933  
H,0,2.1823740213,-2.579943494,0.2652789656  
H,0,-4.7556834312,-0.3556270203,-0.1735547965  
H,0,-4.861051701,0.8894642073,-1.4539786841  
H,0,-4.6271706137,-1.8534731594,-2.0635255781  
H,0,-3.9203073119,-0.5987812477,-3.1141319854  
H,0,2.6144859623,-0.3443831985,-1.5616203672  
H,0,4.3169628933,3.5374590559,-1.0528137501  
H,0,2.1198894112,4.359022886,-0.111883335  
H,0,-3.674041999,-3.3413509055,2.3448015005  
H,0,-3.9042641585,-3.3674197464,0.5761530417  
H,0,-1.5894885265,-4.5493218754,2.1834794093  
H,0,-2.2447057537,-5.1002968633,0.6231984157  
H,0,2.6762926037,-2.6192314548,-3.1386573672  
H,0,1.691965322,-4.1037553618,-3.0827710735  
H,0,1.051839757,-1.8894220908,-4.7512912172  
H,0,-0.18350589,-3.0167152763,-4.1373294383  
H,0,-3.4218411188,4.8319992079,-1.2253112059  
H,0,-4.1141161926,3.2440051563,-0.8255245903  
H,0,-2.9204712864,2.1883192158,-2.5961524181  
H,0,-2.4945078102,3.8180679411,-3.1847461149  
C,0,-1.9626544506,4.1539035474,5.3486789716  
C,0,-0.5910210445,2.5000714004,6.5888743531  
C,0,0.5082350833,4.2459827012,5.1636289662  
H,0,-1.9068230464,4.8353066171,6.2082061339  
H,0,-2.086007687,4.7673509828,4.4457910887  
H,0,-2.8637967675,3.5377638897,5.4740532458  
H,0,-0.5970262496,3.1786435429,7.4535827491  
H,0,-1.4382738246,1.8082981095,6.692881192  
H,0,0.3328818462,1.908974143,6.6376058695  
H,0,0.527314361,4.9457404368,6.0112086988  
H,0,1.4620762771,3.7025989804,5.1587101333  
H,0,0.4520994035,4.8323348126,4.2365512729  
C,0,4.5473514094,-0.9351861337,5.4649033846  
C,0,4.4950444631,-3.2978432964,4.7083944072  
C,0,5.9299044542,-1.6214461123,3.5206350623  
H,0,5.3087093303,-3.5213698007,5.4127640697  
H,0,3.5407517481,-3.4841484668,5.2200042544  
H,0,4.5725468917,-4.0070390822,3.8745500392  
H,0,5.3863881298,-1.1759573483,6.1308784958  
H,0,4.6355183399,0.1258779679,5.1929327349  
H,0,3.620694648,-1.0714440052,6.039890967  
H,0,6.7633097401,-1.8218558308,4.2086379745  
H,0,6.0461840278,-2.2846190799,2.6539679146  
H,0,6.0213821967,-0.5861062848,3.1651461832

### TS5-OBeganti M06/BS1

OBegleftantimetaFM06PS

M06/gen

E(RM06) = -2335.16879005

Zero-point correction= 0.749172 (Hartree/Particle)

Thermal correction to Energy= 0.797412

Thermal correction to Enthalpy= 0.798357

Thermal correction to Gibbs Free Energy= 0.666667

Sum of electronic and ZPE= -2334.419619

Sum of electronic and thermal Energies= -2334.371378

Sum of electronic and thermal Enthalpies= -2334.370433

Sum of electronic and thermal Free Energies= -2334.502123

| E        | CV        | S               |
|----------|-----------|-----------------|
| KCal/Mol | Cal/Mol-K | Cal/Mol-K       |
| Total    | 500.384   | 184.801 277.165 |

C,0,-3.4125366695,-0.4555369491,-0.575360218

C,0,-2.0575237021,-0.1564738736,-0.7230683852

N,0,-1.1420138504,-1.1319793852,-0.8637726401

C,0,-1.5536611731,-2.4019142591,-0.9546866483

C,0,-2.8857397604,-2.7586148628,-0.830717915

C,0,-3.8545968791,-1.777303304,-0.5947916647

C,0,-1.5374354563,1.2301498421,-0.7234656596

N,0,-0.1973510803,1.3566962693,-0.6745458498

C,0,0.3301458263,2.5767974172,-0.7355494895

C,0,-0.4420173349,3.730053872,-0.8110496071

C,0,-1.8314041488,3.634851158,-0.833111025

C,0,-2.3678054619,2.3431461803,-0.8012004549

Ir,0,0.9596025115,-0.6028140536,-0.2411062057

B,0,1.7611134847,-2.4502390584,0.0477288608

O,0,2.740303165,-2.7622322458,0.9838106552

C,0,3.0729560721,-4.1330085788,0.8500682453

C,0,1.8766472534,-4.7337649157,0.1146729853

O,0,1.2805674035,-3.6224428665,-0.541183528

C,0,0.046346605,-0.6390965672,1.7856535501

C,0,-0.4859443393,-1.8721307713,2.193626596

C,0,-1.4205678872,-1.9427302946,3.2114901833

C,0,-1.8449221079,-0.8245994102,3.909375472

C,0,-1.2889477263,0.400026617,3.5563760016

C,0,-0.3537925641,0.4828615202,-2.5262291823

F,0,-1.9406772423,-3.1494829649,3.5361142763

O,0,0.101315222,1.7481949549,2.2199167843

B,0,1.3982805596,2.1197489058,2.3568278964

O,0,2.3808844624,1.3564064041,2.9266849546

C,0,3.5852894114,2.1076469026,2.882069457

C,0,3.21788631,3.4248988856,2.1643108645

O,0,1.814068213,3.3641505268,1.9554371774

B,0,1.5683579628,-0.6515706496,-2.2713582251

O,0,1.487867336,-1.7497340072,-3.1068837129

C,0,1.8664747967,-1.35102013,-4.4178087949

C,0,2.5756967304,-0.0154730593,-4.2086307543

O,0,2.0664329002,0.4537990548,-2.9674958769

B,0,2.9054623267,0.0410951558,-0.4040581208

O,0,3.2791451151,1.3730046461,-0.1755632624

C,0,4.5565745024,1.5607057427,-0.7712873167

C,0,5.1462823762,0.1556949069,-0.8111993847

O,0,4.0063519541,-0.6858628237,-0.8444952851

H,0,1.5663632239,-0.4404959099,1.2723338139

H,0,1.4168584874,2.6286605767,-0.6926488657

H,0,-3.4452504547,2.2059775169,-0.8452854938

H,0,0.0657141612,4.6893134416,-0.8290849515

C,0,-2.7535223514,4.846288392,-0.8910780862

H,0,-4.1175900002,0.3519851349,-0.4085091583

C,0,-5.3006715341,-2.1723739764,-0.3308522262

H,0,-3.1494727876,-3.8121329468,-0.8816209482

H,0,-0.7640673073,-3.1401477729,-1.094380947

H,0,4.4183672555,1.9719687345,-1.7832489621

H,0,5.1512871177,2.2687658357,-0.178309358

H,0,5.771432979,-0.0266909677,-1.693206579  
H,0,5.7397677558,-0.0687018138,0.08913323  
H,0,-0.2077882124,-2.7999887562,1.6937368583  
H,0,-2.5747774312,-0.9196146961,4.7084164214  
H,0,-1.5716554848,1.3135050144,4.075072739  
H,0,2.376686595,0.7179532442,-4.9985220828  
H,0,3.6665535143,-0.1460639679,-4.1169034298  
H,0,0.9651903496,-1.2475186915,-5.0400689282  
H,0,2.5099735985,-2.1168264659,-4.8654064698  
H,0,1.1471869451,-5.1749037099,0.8125583362  
H,0,2.1549306408,-5.4952491929,-0.6229914881  
H,0,3.2400254085,-4.5753635283,1.8392035704  
H,0,4.0008927013,-4.2241843888,0.2657094553  
H,0,3.4562257122,4.3133753824,2.7616143022  
H,0,3.7132827755,3.511242477,1.1885993795  
H,0,4.343789081,1.5339619364,2.3345081222  
H,0,3.9411597256,2.2701089451,3.9072740326  
C,0,-1.9729424945,6.1589413586,-0.9194326425  
C,0,-3.6164373383,4.7692879796,-2.1569897374  
C,0,-3.6552436452,4.8484550616,0.35040222  
H,0,-2.6750705977,7.0004428453,-0.9658640217  
H,0,-1.3601118822,6.2890222692,-0.018536688  
H,0,-1.3178314814,6.2265182181,-1.7974897474  
H,0,-4.277891239,5.6437714882,-2.2129247802  
H,0,-2.9916756085,4.7559564544,-3.0592197583  
H,0,-4.2493561457,3.8739102733,-2.1729919425  
H,0,-4.3129182276,5.7274500207,0.3349021976  
H,0,-4.2921895023,3.9571386004,0.4000753587  
H,0,-3.0559130104,4.8842091521,1.2688365179  
C,0,-6.21211543,-0.9597325729,-0.147800551  
C,0,-5.8361684526,-3.001862509,-1.5039049794  
C,0,-5.3365693323,-3.0049023179,0.9583381466  
H,0,-6.8793168113,-3.2855439661,-1.3134688981  
H,0,-5.8050674923,-2.4278131489,-2.4389779481  
H,0,-5.2664655884,-3.9257337651,-1.656549293  
H,0,-7.2387242629,-1.3008525317,0.0333302968  
H,0,-5.9153134927,-0.3475717609,0.713633755  
H,0,-6.2311324724,-0.3214868097,-1.0412511477  
H,0,-6.3710673292,-3.2845098658,1.1969772299  
H,0,-4.7497112709,-3.9265649975,0.8675925581  
H,0,-4.9285574733,-2.435369299,1.8035451707

### TS5-F M06/BSsmall

leftFmetaOBegM06SBa

leftFmetaOBeg

M06/gen

E(RM06) = -2335.04360634

Zero-point correction= 0.753465 (Hartree/Particle)  
Thermal correction to Energy= 0.802253  
Thermal correction to Enthalpy= 0.803197  
Thermal correction to Gibbs Free Energy= 0.665879  
Sum of electronic and ZPE= -2334.290142  
Sum of electronic and thermal Energies= -2334.241353  
Sum of electronic and thermal Enthalpies= -2334.240409  
Sum of electronic and thermal Free Energies= -2334.377727

| E             | CV        | S         |
|---------------|-----------|-----------|
| KCal/Mol      | Cal/Mol-K | Cal/Mol-K |
| Total 503.421 | 183.894   | 289.011   |

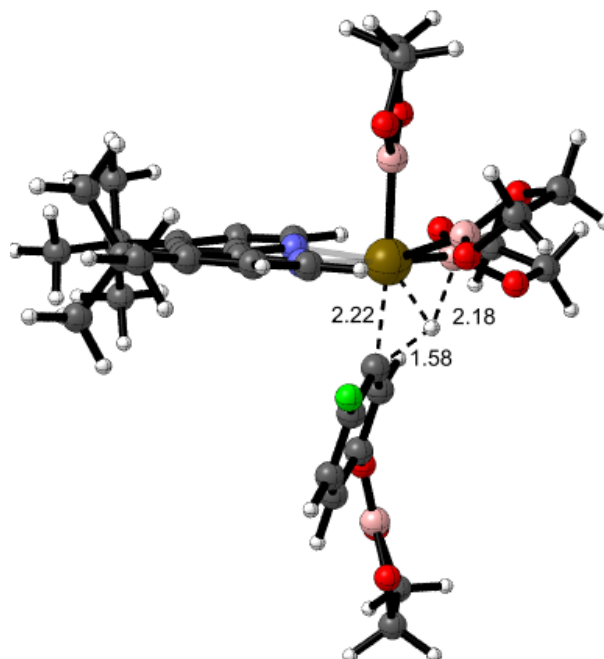

C,-0.845406,2.979139,1.338458  
C,-0.965807,1.711894,0.765132  
N,-0.246797,0.671115,1.225768  
C,0.563816,0.85923,2.274973  
C,0.711092,2.089906,2.88993  
C,0.006442,3.200261,2.41651  
C,-1.898403,1.427404,-0.34821  
N,-1.844981,0.184525,-0.86121  
C,-2.690102,-0.143243,-1.836638  
C,-3.624369,0.745765,-2.352321  
C,-3.703757,2.04142,-1.846456  
C,-2.811804,2.365234,-0.82184  
Ir,-0.322738,-1.269151,0.093399  
B,1.013388,-2.395263,1.125825  
O,1.731534,-3.465959,0.606282  
C,2.543539,-4.010026,1.627367  
C,2.598612,-2.913483,2.692442  
O,1.477513,-2.093773,2.408837  
C,2.562803,-0.220007,-0.608098  
C,1.303115,-0.449642,-1.176614  
C,1.103949,0.104125,-2.439541  
C,2.047613,0.877443,-3.096319  
C,3.27741,1.116539,-2.494535  
C,3.528908,0.551302,-1.247905  
F,-0.054254,-0.133665,-3.088518  
O,4.705315,0.755887,-0.564903  
B,5.93864,0.874615,-1.103894  
O,6.251674,0.789462,-2.439064  
C,7.635861,1.075057,-2.559038  
C,8.175776,1.002372,-1.121253  
O,7.027441,1.093996,-0.298072  
B,-1.848609,-1.889095,1.419085  
O,-1.705718,-2.114265,2.776283  
C,-2.979367,-2.413344,3.322553  
C,-3.845497,-2.72595,2.104266  
O,-3.177482,-2.084675,1.031467  
B,-1.130479,-3.056528,-0.537744

O,-1.798829,-3.167318,-1.757291  
 C,-2.532358,-4.380365,-1.74114  
 C,-1.847743,-5.213279,-0.65975  
 O,-1.206021,-4.254983,0.161173  
 H,0.56003,-1.843099,-1.173815  
 H,-2.598151,-1.163325,-2.209445  
 H,-2.843767,3.358682,-0.380219  
 H,-4.282107,0.405756,-3.147706  
 C,-4.700095,3.077412,-2.351682  
 H,-1.419053,3.803664,0.926975  
 C,0.181564,4.562684,3.073166  
 H,1.390189,2.17123,3.736417  
 H,1.097922,-0.027439,2.616867  
 H,-3.581311,-4.163178,-1.482124  
 H,-2.507513,-4.847311,-2.733558  
 H,-2.552366,-5.805925,-0.061764  
 H,-1.093714,-5.896956,-1.07935  
 H,1.813894,1.276797,-4.081458  
 H,4.036499,1.711186,-2.99522  
 H,-4.873307,-2.351131,2.18884  
 H,-3.886394,-3.809788,1.902371  
 H,-3.351508,-1.539475,3.88047  
 H,-2.89648,-3.25465,4.021657  
 H,3.519214,-2.311738,2.616122  
 H,2.527733,-3.300723,3.716701  
 H,3.531121,-4.267964,1.223888  
 H,2.078437,-4.930992,2.011883  
 H,8.106258,0.348221,-3.232064  
 H,7.75906,2.076465,-2.99681  
 H,8.870872,1.816942,-0.88305  
 H,8.686757,0.048891,-0.922198  
 C,-5.589536,2.522902,-3.462077  
 C,-5.600106,3.523939,-1.193729  
 C,-3.93506,4.284742,-2.905969  
 H,-6.333122,4.261457,-1.55015  
 H,-6.150591,2.671956,-0.772016  
 H,-5.029701,3.990794,-0.380337  
 H,-6.291365,3.29974,-3.793591  
 H,-5.004484,2.210888,-4.338182  
 H,-6.183771,1.664277,-3.120275  
 H,-4.641449,5.041013,-3.276615  
 H,-3.306347,4.762206,-2.143304  
 H,-3.284198,3.988843,-3.739974  
 C,-0.664564,5.643946,2.405399  
 C,-0.235104,4.464986,4.54571  
 C,1.654623,4.97805,2.981455  
 H,-0.116616,5.44137,5.036676  
 H,-1.287338,4.16286,4.63868  
 H,0.372736,3.738006,5.099537  
 H,1.797946,5.962745,3.448463  
 H,2.317249,4.268044,3.492341  
 H,1.980709,5.046048,1.934685  
 H,-0.49985,6.604359,2.911625  
 H,-0.397038,5.779585,1.348093  
 H,-1.738937,5.420639,2.466845  
 H,2.821056,-0.634925,0.367615

### TS5-OBeg<sub>syn</sub> M06/BSsmall

This structure is the higher-energy *syn* conformer of TS5-OBeg<sub>anti</sub> given above and discussed in the main text.

OBegleftsynmetaFM06SB

OBegleftsynmetaF

M06/gen  
 E(RM06) = -2335.04787486

Zero-point correction= 0.753268 (Hartree/Particle)  
 Thermal correction to Energy= 0.801596  
 Thermal correction to Enthalpy= 0.802540  
 Thermal correction to Gibbs Free Energy= 0.670267  
 Sum of electronic and ZPE= -2334.294606  
 Sum of electronic and thermal Energies= -2334.246279  
 Sum of electronic and thermal Enthalpies= -2334.245335  
 Sum of electronic and thermal Free Energies= -2334.377608

| E        | CV        | S               |
|----------|-----------|-----------------|
| KCal/Mol | Cal/Mol-K | Cal/Mol-K       |
| Total    | 503.009   | 183.823 278.393 |

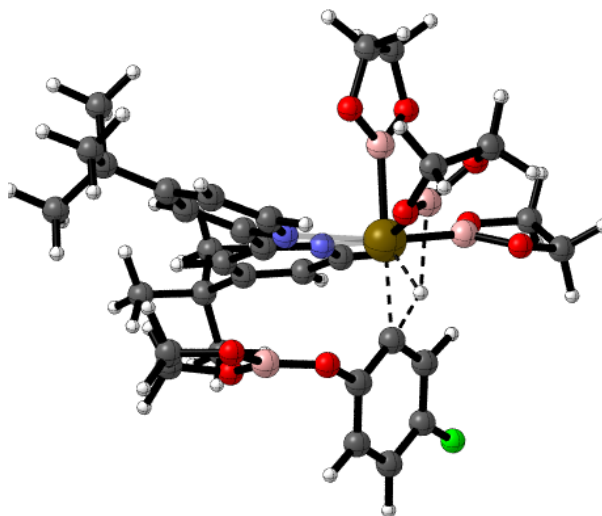

C,2.223685,2.047328,-1.180309  
 C,1.335335,1.022238,-0.855648  
 N,0.004653,1.175812,-0.979581  
 C,-0.45803,2.327777,-1.483367  
 C,0.374624,3.373629,-1.840251  
 C,1.758321,3.263082,-1.673131  
 C,1.801767,-0.290493,-0.370643  
 N,0.898562,-1.02648,0.303854  
 C,1.270512,-2.227496,0.747492  
 C,2.537832,-2.756877,0.525793  
 C,3.480811,-2.030718,-0.19869  
 C,3.081292,-0.765285,-0.640756  
 Ir,-1.335654,-0.357138,-0.009288  
 B,-3.16104,0.266252,-0.617222  
 O,-4.373948,-0.060271,-0.030852  
 C,-5.374563,0.797334,-0.544512  
 C,-4.7452,1.409382,-1.795929  
 O,-3.350471,1.246479,-1.595488  
 C,-1.47155,1.050736,1.718001  
 C,-2.251592,2.206745,1.5538  
 C,-2.198406,3.243275,2.469484  
 C,-1.404308,3.185751,3.602045  
 C,-0.648714,2.038556,3.80063  
 C,-0.688967,0.997276,2.876769  
 F,-2.946632,4.338386,2.253879  
 O,0.036206,-0.142546,3.167339  
 B,1.383209,-0.131444,3.09499  
 O,2.137733,0.914396,2.614865

C,3.496542,0.529343,2.680285  
 C,3.493958,-0.884286,3.306371  
 O,2.134313,-1.195442,3.530101  
 B,-1.265917,-1.539255,-1.7666  
 O,-1.898844,-1.24402,-2.960733  
 C,-1.561983,-2.238317,-3.913374  
 C,-0.972618,-3.372913,-3.078065  
 O,-0.562519,-2.742371,-1.876305  
 B,-2.19167,-2.207306,0.311071  
 O,-1.650857,-3.102415,1.233941  
 C,-2.211075,-4.378581,0.973208  
 C,-3.496129,-4.065702,0.213325  
 O,-3.254181,-2.793802,-0.361401  
 H,-2.064466,-0.412089,1.462508  
 H,0.505452,-2.781538,1.291307  
 H,3.757002,-0.157028,-1.240147  
 H,2.759627,-3.744492,0.920772  
 C,4.866981,-2.563137,-0.544554  
 H,3.286091,1.890845,-1.011311  
 C,2.673656,4.429505,-2.017917  
 H,-0.074542,4.28324,-2.234411  
 H,-1.538994,2.385208,-1.604919  
 H,-1.507573,-4.960456,0.353979  
 H,-2.375541,-4.915961,1.915105  
 H,-3.720439,-4.796137,-0.57475  
 H,-4.367435,-4.002175,0.883011  
 H,-2.903713,2.33066,0.688996  
 H,-1.395339,4.013746,4.306578  
 H,-0.021993,1.933274,4.685523  
 H,-0.119408,-3.872048,-3.554777  
 H,-1.73093,-4.136981,-2.83838  
 H,-0.830392,-1.826792,-4.626499  
 H,-2.456518,-2.535232,-4.474471  
 H,-4.982784,2.473147,-1.925694  
 H,-5.041128,0.874198,-2.710825  
 H,-5.616773,1.563277,0.210292  
 H,-6.287469,0.226891,-0.75726  
 H,3.920044,0.533054,1.663284  
 H,4.055324,1.257417,3.283623  
 H,4.039955,-0.923824,4.258759  
 H,3.932256,-1.637242,2.631041  
 C,5.127463,-3.931208,0.080827  
 C,4.972817,-2.697449,-2.068964  
 C,5.943264,-1.592728,-0.044587  
 H,5.957917,-3.099517,-2.345378  
 H,4.203977,-3.379259,-2.457053  
 H,4.851564,-1.731236,-2.576301  
 H,6.139768,-4.268484,-0.178861  
 H,5.058811,-3.899717,1.17757  
 H,4.42219,-4.688925,-0.286584  
 H,6.940192,-1.96391,-0.320404  
 H,5.833958,-0.589381,-0.477133  
 H,5.915171,-1.493995,1.049851  
 C,4.143287,4.106543,-1.760743  
 C,2.507558,4.777761,-3.502025  
 C,2.286384,5.638724,-1.1586  
 H,3.167044,5.615869,-3.767747  
 H,2.769421,3.922567,-4.140128  
 H,1.479361,5.075221,-3.74465  
 H,2.936009,6.492785,-1.396765  
 H,1.248765,5.951808,-1.330967  
 H,2.395143,5.413685,-0.088979

H,4.761637,4.976818,-2.017581  
 H,4.330859,3.868409,-0.704362  
 H,4.490324,3.263057,-2.374261

### TS5-OBeg<sub>syn</sub> Conformer B M06/BSsmall

This structure is another higher-energy *syn* conformer of TS5-OBeg<sub>syn</sub> given above and discussed in the main text. In this conformer, the OBeg on the FPhOBeg is oriented for a Lewis acid/base interaction with a Beg on the Ir, but this does not lead to low-energy structure.

OBegrights<sub>syn</sub>metaFM06SB

M06/gen

E(RM06) = -2335.0515106

Zero-point correction= 0.754817 (Hartree/Particle)

Thermal correction to Energy= 0.802154

Thermal correction to Enthalpy= 0.803098

Thermal correction to Gibbs Free Energy= 0.675357

Sum of electronic and ZPE= -2334.296734

Sum of electronic and thermal Energies= -2334.249397

Sum of electronic and thermal Enthalpies= -2334.248453

Sum of electronic and thermal Free Energies= -2334.376194

| E             | CV        | S         |
|---------------|-----------|-----------|
| KCal/Mol      | Cal/Mol-K | Cal/Mol-K |
| Total 503.359 | 183.278   | 268.853   |

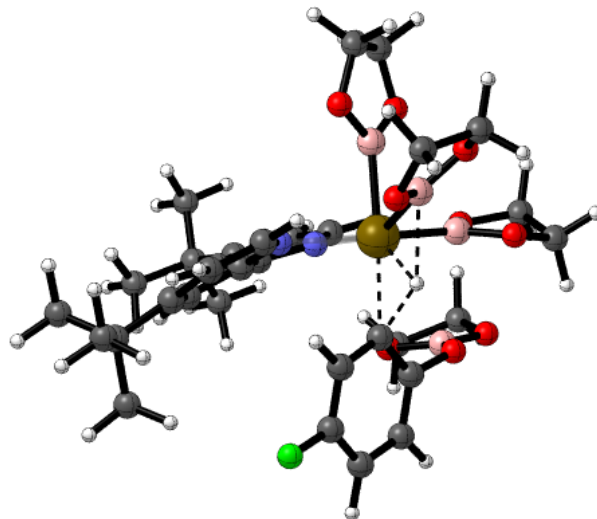

C,0,-3.0888518229,-0.8771872378,-0.0163867506  
 C,0,-1.7751561363,-0.4188488598,-0.1205278109  
 N,0,-0.7278011301,-1.2598331506,-0.0324881026  
 C,0,-0.9696431732,-2.568092179,0.1193253236  
 C,0,-2.251940873,-3.0825325712,0.2029638739  
 C,0,-3.3593160156,-2.2316565957,0.1572604141  
 C,0,-1.4629196442,0.9949930509,-0.4223489037  
 N,0,-0.2189089636,1.2282362649,-0.8787356398  
 C,0,0.0961539186,2.4595982945,-1.2749737428  
 C,0,-0.7812610297,3.5327843266,-1.1619048192  
 C,0,-2.0392927132,3.3403714618,-0.5932036514  
 C,0,-2.3795485221,2.0269246573,-0.2562384969  
 Ir,0,1.3335567521,-0.3814666693,-0.1907953656  
 B,0,2.4655921684,-1.9431344833,0.4227613833  
 O,0,1.9419594721,-3.2329501551,0.6252920922  
 C,0,3.0419590493,-4.1043548702,0.8481725333  
 C,0,4.1473441436,-3.1704754821,1.3211088702

O,0,3.8111163998,-1.9222975293,0.743120183  
 C,0,1.1242521328,0.5377126924,1.8467228469  
 C,0,0.6759591045,1.8609445036,1.9775114842  
 C,0,0.2554854877,2.3664434695,3.1946643529  
 C,0,0.2918327676,1.6122931643,4.35406579  
 C,0,0.7828498061,0.316626401,4.2597929008  
 C,0,1.1997447008,-0.2001778822,3.0352566422  
 F,0,-0.1983925439,3.6341720834,3.2505595323  
 O,0,1.740632477,-1.471041084,3.0427818278  
 B,0,0.9595956734,-2.5683259311,3.1586959322  
 O,0,-0.4140076378,-2.5629983136,3.0553318542  
 C,0,-0.8493167967,-3.866672465,3.3952458672  
 C,0,0.4176127729,-4.7251365696,3.3015397537  
 O,0,1.4804255309,-3.8037050729,3.4660019422  
 B,0,1.4294712042,-1.2063280626,-2.1338447959  
 O,0,1.5558471019,-2.5477900741,-2.4514341212  
 C,0,1.5225226841,-2.685862855,-3.8626429597  
 C,0,1.7152619155,-1.2636970919,-4.387547107  
 O,0,1.3571357535,-0.4346840691,-3.2954826837  
 B,0,2.9806577025,0.3165388634,-1.2155690968  
 O,0,3.1139171511,1.6753117992,-1.5107335151  
 C,0,4.1328144311,1.8076428323,-2.4891742188  
 C,0,4.9277267512,0.5093412012,-2.3728400668  
 O,0,4.0181505532,-0.403298067,-1.7860752729  
 H,0,2.345747816,0.4542811917,0.7964108811  
 H,0,1.1151380348,2.5808487852,-1.645165392  
 H,0,-3.3504573774,1.8155127761,0.1874115489  
 H,0,-0.4481119737,4.517775631,-1.4775063696  
 C,0,-2.99793398,4.4799201078,-0.2805046626  
 H,0,-3.9025069416,-0.1636631851,-0.1092595839  
 C,0,-4.7702420857,-2.7939398732,0.2661543711  
 H,0,-2.3737543702,-4.1605085943,0.3009850008  
 H,0,-0.0852136361,-3.2027740788,0.1718501021  
 H,0,3.6668654612,1.9121562013,-3.4823830455  
 H,0,4.7302490624,2.7055249848,-2.2885132602  
 H,0,5.2699994696,0.1249088873,-3.3425216854  
 H,0,5.8052241171,0.6179972415,-1.717220622  
 H,0,0.6508940854,2.5327971597,1.1202999224  
 H,0,-0.0402869591,2.0379796747,5.2977337968  
 H,0,0.8570742293,-0.3123357603,5.1463922811  
 H,0,1.0903836718,-1.0316532553,-5.2591075041  
 H,0,2.7671017196,-1.0687313052,-4.6558727308  
 H,0,0.553318986,-3.1121512692,-4.1655501266  
 H,0,2.3131478187,-3.3740782438,-4.1863133354  
 H,0,5.1478375797,-3.4796570895,0.993428775  
 H,0,4.1446933885,-3.0771561006,2.418677772  
 H,0,3.2981549199,-4.6021376387,-0.10044476  
 H,0,2.7737036035,-4.8621762258,1.5940101107  
 H,0,0.4722891993,-5.5024669765,4.0733021811  
 H,0,0.5073524958,-5.2058918908,2.3131233199  
 H,0,-1.6400559708,-4.1860077505,2.7021334222  
 H,0,-1.2675077575,-3.8553354226,4.413169097  
 C,0,-2.4450241523,5.8322374732,-0.7241174343  
 C,0,-4.3363191549,4.2502527251,-0.9896957263  
 C,0,-3.2099446116,4.5157745894,1.2395286233  
 H,0,-3.1688335175,6.6216088874,-0.4819366274  
 H,0,-1.5052800226,6.0781836973,-0.2111476541  
 H,0,-2.2692800858,5.8672110558,-1.8084595025  
 H,0,-5.0319732256,5.0672823842,-0.7522532128  
 H,0,-4.2069295014,4.2206743663,-2.08044356  
 H,0,-4.8146033383,3.3112544101,-0.6821409067  
 H,0,-3.8342619885,5.3781740324,1.5128248783

H,0,-3.7142868568,3.6109521342,1.6038520998  
 H,0,-2.2520000543,4.5955356759,1.7717752197  
 C,0,-5.8339069088,-1.6987901046,0.2601604425  
 C,0,-5.0283080138,-3.7279135068,-0.9219019858  
 C,0,-4.8985045058,-3.5803273016,1.5763759472  
 H,0,-6.0415690229,-4.1491862256,-0.8581900138  
 H,0,-4.9436204446,-3.1859957123,-1.873753359  
 H,0,-4.3188195281,-4.5650384131,-0.9485278903  
 H,0,-6.8287376473,-2.1531388383,0.3585153198  
 H,0,-5.705068143,-0.9993462004,1.0979602734  
 H,0,-5.8282998721,-1.1244331902,-0.676667127  
 H,0,-5.9234757618,-3.9609988012,1.6873002652  
 H,0,-4.2215483289,-4.4441571053,1.6079805412  
 H,0,-4.6747605531,-2.9432833176,2.4434251365

### TS for (bpy)IrBpin<sub>3</sub> + 4-FC<sub>6</sub>H<sub>4</sub>OBpin, meta to F, M06/BSsmall

BPINrOBPINMetaFM06SB

M06/gen

E(RM06) = -2649.38481910

Zero-point correction= 0.975237 (Hartree/Particle)

Thermal correction to Energy= 1.032493

Thermal correction to Enthalpy= 1.033437

Thermal correction to Gibbs Free Energy= 0.888855

Sum of electronic and ZPE= -2648.409582

Sum of electronic and thermal Energies= -2648.352326

Sum of electronic and thermal Enthalpies= -2648.351382

Sum of electronic and thermal Free Energies= -2648.495964

| E             | CV        | S         |
|---------------|-----------|-----------|
| KCal/Mol      | Cal/Mol-K | Cal/Mol-K |
| Total 647.899 | 230.480   | 304.299   |

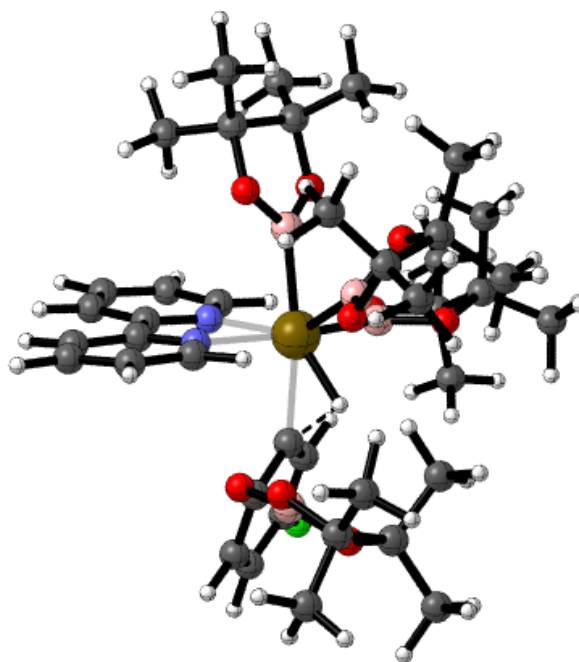

C,0,-3.6033436224,3.9399971904,0.7077285974  
 C,0,-2.2900682983,4.1052814719,0.3012719059  
 C,0,-1.4609911873,3.0309867374,0.0275122365  
 C,0,-1.9165675995,1.7119045868,0.1743406612

C,0,-3.2573856145,1.5564868861,0.549338526  
 C,0,-4.0837960653,2.6417621285,0.822492881  
 Ir,0,-0.3239777333,0.1848843964,0.3195707614  
 N,0,-1.470751972,-0.8744721546,2.0202936829  
 C,0,-1.301436118,-0.3898713484,3.2623462567  
 C,0,-2.0069497914,-0.9189057537,4.3447019481  
 C,0,-2.8857299785,-1.9707011829,4.1307187749  
 C,0,-3.0336109236,-2.4774695053,2.8472192466  
 C,0,-2.3032198211,-1.8967578421,1.8187018246  
 C,0,-0.3208117291,0.7080076463,3.4107039592  
 N,0,0.2424871173,1.1791713471,2.2796224728  
 C,0,1.1633667904,2.148290703,2.3449555758  
 C,0,1.5699670366,2.7037164042,3.550195175  
 C,0,0.9976503953,2.2310610628,4.7243674006  
 C,0,0.0458839442,1.2253743241,4.654953224  
 B,0,1.4094695156,-0.9031262053,0.8468788904  
 O,0,1.4124047719,-2.0544906314,1.626065689  
 C,0,2.7257544851,-2.2037000539,2.1911272195  
 C,0,3.6124703113,-1.4130510709,1.1852628693  
 O,0,2.6979060869,-0.2418930078,0.6909075034  
 B,0,-0.1406998732,-1.4628961228,-0.9108293833  
 O,0,0.9961700995,-1.9075061292,-1.58175316  
 C,0,0.6206688074,-3.0074835871,-2.4177079553  
 C,0,-0.5875469452,-3.5900696555,-1.642526381  
 O,0,-1.1698275949,-2.4003274171,-1.0760405123  
 B,0,0.8517144824,1.1320489461,-1.0434472597  
 O,0,1.6699987975,2.2226678821,-0.7246481865  
 C,0,2.2270047321,2.7465969103,-1.9430594444  
 C,0,2.1201749169,1.520714557,-2.8926351829  
 O,0,0.943780961,0.8670036706,-2.4029212442  
 H,0,-1.5075342633,0.5362670811,-0.8071145115  
 H,0,-2.3845016057,-2.2427370167,0.7889505252  
 H,0,-1.8865289744,-0.5126934733,5.3453394438  
 H,0,-3.7140596326,-3.2968410019,2.6301620313  
 H,0,-3.4496146497,-2.3875287881,4.963224353  
 H,0,-0.3988944121,0.8383689974,5.5676500092  
 H,0,1.2915704046,2.6375054612,5.6902326922  
 H,0,2.3206631489,3.4897222941,3.5591126225  
 H,0,1.5799207624,2.4617985427,1.3872963232  
 C,0,-0.1763096485,-4.4828102841,-0.4780603271  
 C,0,-1.6074114881,-4.3063682865,-2.5025963388  
 C,0,1.7958896669,-3.9508065799,-2.5735458965  
 C,0,0.2388157156,-2.4284234168,-3.7751670517  
 H,0,-0.4342967045,3.2387287156,-0.2714300283  
 O,0,-3.8063116974,0.2932291304,0.6591393023  
 H,0,-4.2273856326,4.8070293985,0.9097925851  
 F,0,-1.7995327125,5.3495202498,0.1741581891  
 H,0,-5.114451607,2.4501309383,1.1176159978  
 C,0,2.6833568341,-1.5696841505,3.5761406587  
 C,0,3.0472224274,-3.6802358953,2.3078718248  
 C,0,4.8078733423,-0.7068177622,1.7932205628  
 C,0,4.049915206,-2.2536197221,-0.0052464643  
 C,0,1.3547517101,3.9137997306,-2.3848290622  
 C,0,3.63953661,3.222308707,-1.6705348218  
 C,0,1.9323068431,1.8519705472,-4.3586793933  
 C,0,3.276600749,0.5417305551,-2.7192607445  
 H,0,-1.058784253,-4.6695352124,0.1487040473  
 H,0,0.2085383541,-5.4527256043,-0.8222132479  
 H,0,0.5813089466,-3.9950927982,0.1510532725  
 H,0,-2.4130725557,-4.7047493585,-1.8713350134  
 H,0,-2.054592086,-3.6430259066,-3.2524300043  
 H,0,-1.1420423077,-5.1556686336,-3.0235979053

H,0,1.5222230455,-4.8143448216,-3.1967118294  
 H,0,2.6252916619,-3.4247048239,-3.0656303008  
 H,0,2.1577978303,-4.3235825943,-1.6081418347  
 H,0,-0.0146102092,-3.2132657637,-4.501052878  
 H,0,-0.6071542495,-1.7344428906,-3.6848892706  
 H,0,1.0889850847,-1.8539212748,-4.1659347947  
 H,0,4.0777359312,-3.8320114708,2.6605232545  
 H,0,2.3686301139,-4.1508436156,3.0312715388  
 H,0,2.9269662623,-4.1977311245,1.3486758261  
 H,0,3.6249892831,-1.7124361826,4.1237308945  
 H,0,2.4761281803,-0.4918817387,3.5149097841  
 H,0,1.8740668443,-2.037222867,4.1534252183  
 H,0,4.521072683,-1.6002481224,-0.7510861407  
 H,0,4.773400564,-3.0282724811,0.2829120869  
 H,0,3.1813287995,-2.7223910675,-0.4831804656  
 H,0,5.3470592848,-0.1639647475,1.0055305244  
 H,0,4.5079892351,0.0228830769,2.5548960044  
 H,0,5.5044162565,-1.4269325881,2.2467147227  
 H,0,1.7674801091,4.4178860682,-3.2693357538  
 H,0,0.3342110738,3.581129559,-2.6165862231  
 H,0,1.2942011387,4.6490444049,-1.5710105377  
 H,0,4.1377558564,3.5250717111,-2.6028383737  
 H,0,3.6174444659,4.0940292568,-1.0031548543  
 H,0,4.237595965,2.4408772902,-1.1881854629  
 H,0,1.8748147314,0.9208153247,-4.9381700175  
 H,0,1.0081791956,2.4132674222,-4.5355035324  
 H,0,2.7807032523,2.4374127533,-4.7418916113  
 H,0,3.0064470457,-0.4047751836,-3.2064016312  
 H,0,4.2063753369,0.9186282273,-3.1680446457  
 H,0,3.4444052129,0.3239114777,-1.655812737  
 B,0,-4.3254564282,-0.278224786,-0.4579177178  
 O,0,-4.7588830171,-1.5790835177,-0.4678036582  
 C,0,-5.4599609302,-1.7468725111,-1.7169295788  
 C,0,-4.8221804934,-0.6392480662,-2.6150978583  
 O,0,-4.4911562772,0.3769388484,-1.650157253  
 C,0,-3.5129900136,-1.0697380707,-3.259067711  
 C,0,-5.7520599491,-0.047592686,-3.6536730139  
 C,0,-5.2496710991,-3.1615464036,-2.2098452913  
 C,0,-6.9360248232,-1.5054703024,-1.4325454078  
 H,0,-5.2160372786,0.7129061002,-4.2349481096  
 H,0,-6.0995225014,-0.8239778832,-4.3497782783  
 H,0,-6.6243255089,0.4316246007,-3.1962343984  
 H,0,-3.0185042871,-0.1811866843,-3.6736541518  
 H,0,-2.8342865924,-1.515598745,-2.5183667782  
 H,0,-3.6752517152,-1.7876512563,-4.0757928771  
 H,0,-7.5582661283,-1.7042820328,-2.31497213  
 H,0,-7.2538670067,-2.1801574722,-0.6280733767  
 H,0,-7.1198658435,-0.4749314376,-1.1022103733  
 H,0,-5.6717576634,-3.2908835669,-3.2164576465  
 H,0,-4.1853867199,-3.417674365,-2.2360778264  
 H,0,-5.7535965831,-3.8687956174,-1.5384677256

**TS for (bpy)IrBpin<sub>3</sub> + 4-FC<sub>6</sub>H<sub>4</sub>OBpin, ortho to F, M06/BSsmall**

BPINrOBPINOrthoFM06SB

M06/gen

E(RM06) = -2649.37950521

Zero-point correction= 0.973595 (Hartree/Particle)

Thermal correction to Energy= 1.031712

Thermal correction to Enthalpy= 1.032657

Thermal correction to Gibbs Free Energy= 0.883138

Sum of electronic and ZPE= -2648.405911  
 Sum of electronic and thermal Energies= -2648.347793  
 Sum of electronic and thermal Enthalpies= -2648.346849  
 Sum of electronic and thermal Free Energies= -2648.496367

E CV S  
 KCal/Mol Cal/Mol-K Cal/Mol-K  
 Total 647.409 231.471 314.688

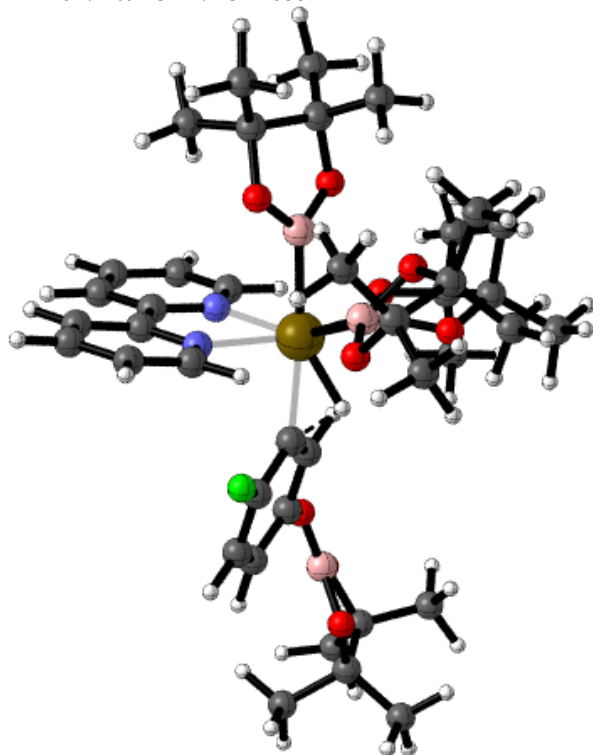

C,0,-4.5208730853,-1.7804610393,-1.0824915935  
 C,0,-4.174144836,-0.7330082956,-0.2338484134  
 C,0,-2.8460893054,-0.3440726602,-0.0921111697  
 C,0,-1.8103840699,-0.9985624288,-0.7713668438  
 C,0,-2.199296949,-2.0219097104,-1.6317220835  
 C,0,-3.5153252293,-2.4244760299,-1.7948707507  
 Ir,0,0.2537168566,-0.6588217127,-0.0691798185  
 N,0,0.7451793556,-2.9116547165,-0.2825591348  
 C,0,0.5350754301,-3.6796456165,0.7999325408  
 C,0,0.9158775742,-5.0230342302,0.8183758826  
 C,0,1.5259028261,-5.569783627,-0.2999534679  
 C,0,1.7441709555,-4.763945868,-1.4097790938  
 C,0,1.3357786682,-3.4381978116,-1.3571967572  
 C,0,-0.0827284851,-3.0158190222,1.9682392663  
 N,0,-0.296945788,-1.6876662389,1.8704270169  
 C,0,-0.8130303937,-1.0192004669,2.9093640504  
 C,0,-1.1561552917,-1.6468437756,4.0989085669  
 C,0,-0.9557506967,-3.0164620214,4.2089658792  
 C,0,-0.4129748912,-3.7060134284,3.1355551356  
 B,0,2.0883627848,-0.4033702025,0.9471181011  
 O,0,3.1191122544,-1.3408135973,0.9377070684  
 C,0,3.9498335323,-1.084249954,2.0815080037  
 C,0,3.7066127015,0.4308478483,2.328173466  
 O,0,2.3536950991,0.5916327167,1.8733713533  
 B,0,1.6295298516,0.0275895759,-1.4377606728  
 O,0,2.5373652685,1.0704556483,-1.2973824228  
 C,0,3.1549041541,1.2928082549,-2.5713939699  
 C,0,3.0640296081,-0.1176125571,-3.2142110367  
 O,0,1.8285581991,-0.6083937139,-2.6646532446  
 B,0,-0.0839334676,1.2970193887,0.3526000234  
 O,0,-0.5247848291,1.7627647989,1.5932284398  
 C,0,-0.7869127577,3.1726888919,1.4855323756  
 C,0,0.0624323502,3.5645258346,0.2424781332  
 O,0,0.0231323642,2.3618542209,-0.532786479  
 H,0,-0.597079713,-0.2414051427,-1.4241834015  
 H,0,1.4862730908,-2.7522274624,-2.1903021331  
 H,0,0.749953451,-5.6389811254,1.6984587803  
 H,0,2.2247745431,-5.1489342973,-2.3058832739  
 H,0,1.8318674027,-6.6143780408,-0.3002646272  
 H,0,-0.2538819408,-4.7782980774,3.2076937774  
 H,0,-1.2185101643,-3.5468450637,5.1221653413  
 H,0,-1.5745097803,-1.0647252821,4.9159783799  
 H,0,-0.9325947356,0.0545563081,2.762479351  
 C,0,4.1661334172,-1.0553010686,-2.7359630344  
 C,0,2.9789429291,-0.1299861776,-4.7257909152  
 C,0,4.5598683193,1.817714485,-2.3577868564  
 C,0,2.3178233786,2.3366621488,-3.3007316794  
 H,0,-2.6266820131,0.4763404951,0.5929517418  
 O,0,-5.1027986833,-0.0848623851,0.5447184059  
 H,0,-5.5620560303,-2.07594221,-1.1945155071  
 F,0,-1.2590275206,-2.6600035012,-2.3597971749  
 H,0,-3.7407039668,-3.2370392107,-2.4831031203  
 C,0,3.4215848167,-1.9607004439,3.2123063469  
 C,0,5.3795135709,-1.4622411097,1.7533761744  
 C,0,3.7903915125,0.8698374433,3.7756909832  
 C,0,4.5850822034,1.3188720765,1.4584101237  
 C,0,-2.2829910818,3.3428057821,1.259972048  
 C,0,-0.3732978889,3.8429158793,2.7805738817  
 C,0,-0.4954250889,4.7061139074,-0.582432482  
 C,0,1.5267187244,3.8271259766,0.5809760755  
 H,0,3.9359993895,-2.0751067699,-3.0737159697  
 H,0,5.14827705,-0.7772991507,-3.142489563  
 H,0,4.2209651461,-1.0701135352,-1.6371769164  
 H,0,2.9236424177,-1.1646401258,-5.088533581  
 H,0,2.09006517,0.3987142959,-5.08617258  
 H,0,3.8709079231,0.3359886693,-5.1689335188  
 H,0,5.06559421,1.9891473576,-3.3189846264  
 H,0,4.5118668666,2.7754906053,-1.8213090624  
 H,0,5.1707647529,1.1299231682,-1.7621841775  
 H,0,2.7648520937,2.6227169539,-4.2627186676  
 H,0,1.2966611452,1.9746966998,-3.4741507835  
 H,0,2.2459089876,3.2329285871,-2.6699441978  
 H,0,6.0557559068,-1.1977227618,2.5791122876  
 H,0,5.4489146234,-2.5459539889,1.5928064303  
 H,0,5.7285754755,-0.9642440947,0.8416463679  
 H,0,4.0284297295,-1.8704213836,4.1235807499  
 H,0,2.3809936249,-1.7011061235,3.4566190975  
 H,0,3.4414278958,-3.0100949877,2.8873144592  
 H,0,4.2201359304,2.3527835232,1.5201986821  
 H,0,5.6343148994,1.3016753874,1.7833144473  
 H,0,4.522388042,1.0141810738,0.4066925565  
 H,0,3.5867234259,1.9468738103,3.8427329768  
 H,0,3.0559321974,0.3509177398,4.4019217837  
 H,0,4.7949530859,0.6888158787,4.1849631664  
 H,0,-2.5798217881,4.400546406,1.264239381  
 H,0,-2.5951923369,2.8953726807,0.306926484  
 H,0,-2.826023976,2.8320697236,2.0664096304  
 H,0,-0.4555879758,4.9367545838,2.7025774516  
 H,0,-1.0307858497,3.5137050633,3.5961696906

H,0,0.6564732185,3.583209918,3.0510755986  
H,0,0.1608470708,4.8877945172,-1.4439242833  
H,0,-1.4963924292,4.4780803164,-0.9650311998  
H,0,-0.5454548901,5.6323657889,0.0082060462  
H,0,2.1007755581,3.857425798,-0.3557677361  
H,0,1.662148085,4.7823095572,1.1073191294  
H,0,1.9405102342,3.010359217,1.1885239007  
B,0,-6.3378948075,0.2889985336,0.1309585265  
O,0,-7.2601893957,0.7661247686,1.0262651964  
C,0,-8.3417951555,1.2957640449,0.2391709162  
C,0,-8.2130094582,0.4889704575,-1.0891851198  
O,0,-6.7953251536,0.2458658034,-1.1628160686  
C,0,-8.8885799417,-0.8744733093,-1.0255535213  
C,0,-8.6537406993,1.2290252571,-2.3342735792  
C,0,-9.6419669024,1.0899047572,0.9886032651  
C,0,-8.0760458277,2.7844822645,0.0590903642  
H,0,-8.5356210955,0.5807885249,-3.211503037  
H,0,-9.7130828243,1.5130383928,-2.2620559629  
H,0,-8.0578644154,2.1318275964,-2.5037589239  
H,0,-8.5673072471,-1.4659131303,-1.8922343148  
H,0,-8.6027254903,-1.4204884659,-0.1165519465  
H,0,-9.9830009585,-0.7920192863,-1.0515441257  
H,0,-10.499176501,1.4015658644,0.3751909282  
H,0,-9.7812785002,0.0444002964,1.2834935192  
H,0,-9.6408839782,1.6982867557,1.9015825341  
H,0,-8.9037908616,3.2880243757,-0.4573868454  
H,0,-7.9579698951,3.2418260304,1.048937268  
H,0,-7.1519283115,2.9626566119,-0.5060670832



## Spectral Copies

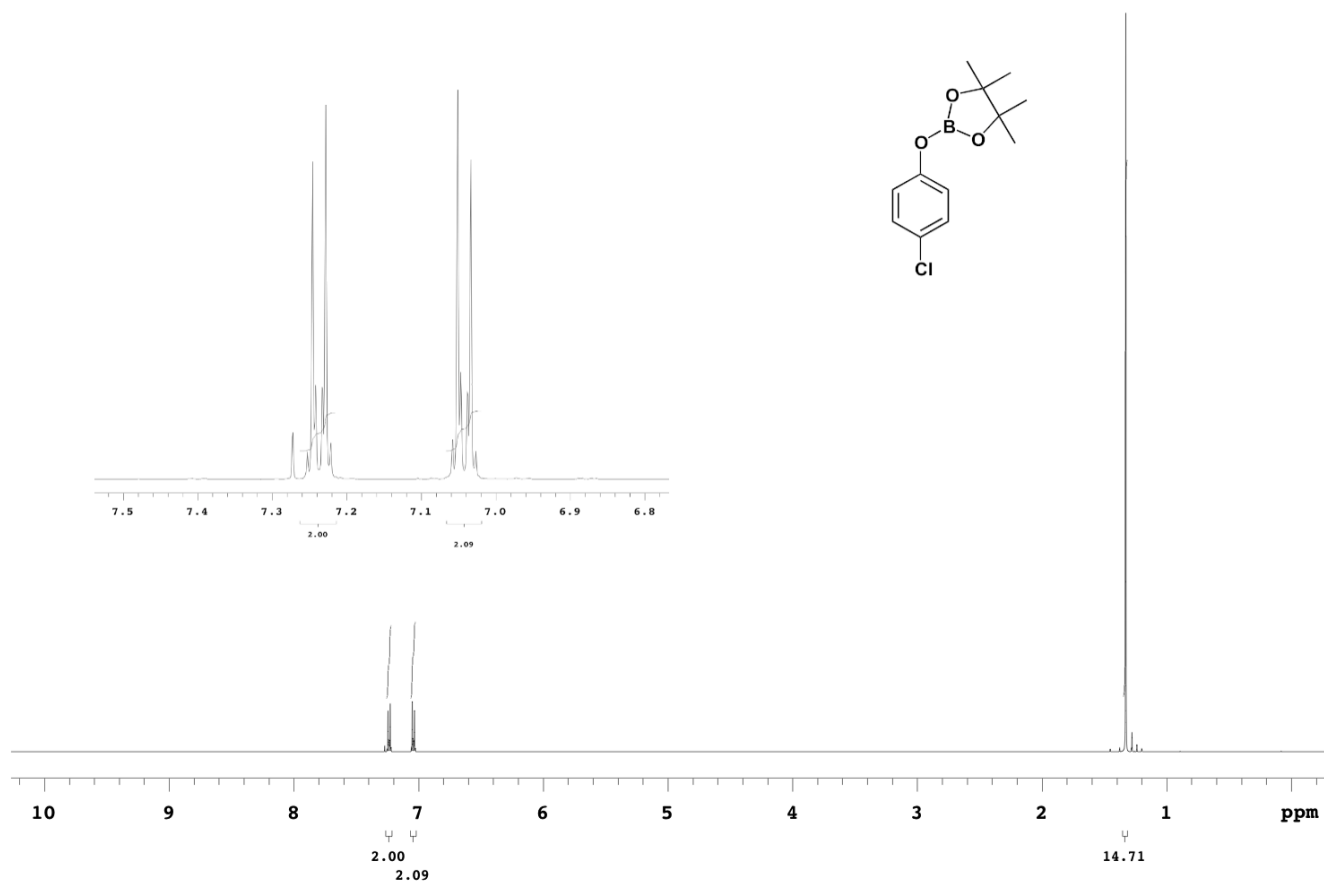

$^1\text{H-NMR}$  (500 MHz,  $\text{CDCl}_3$ )

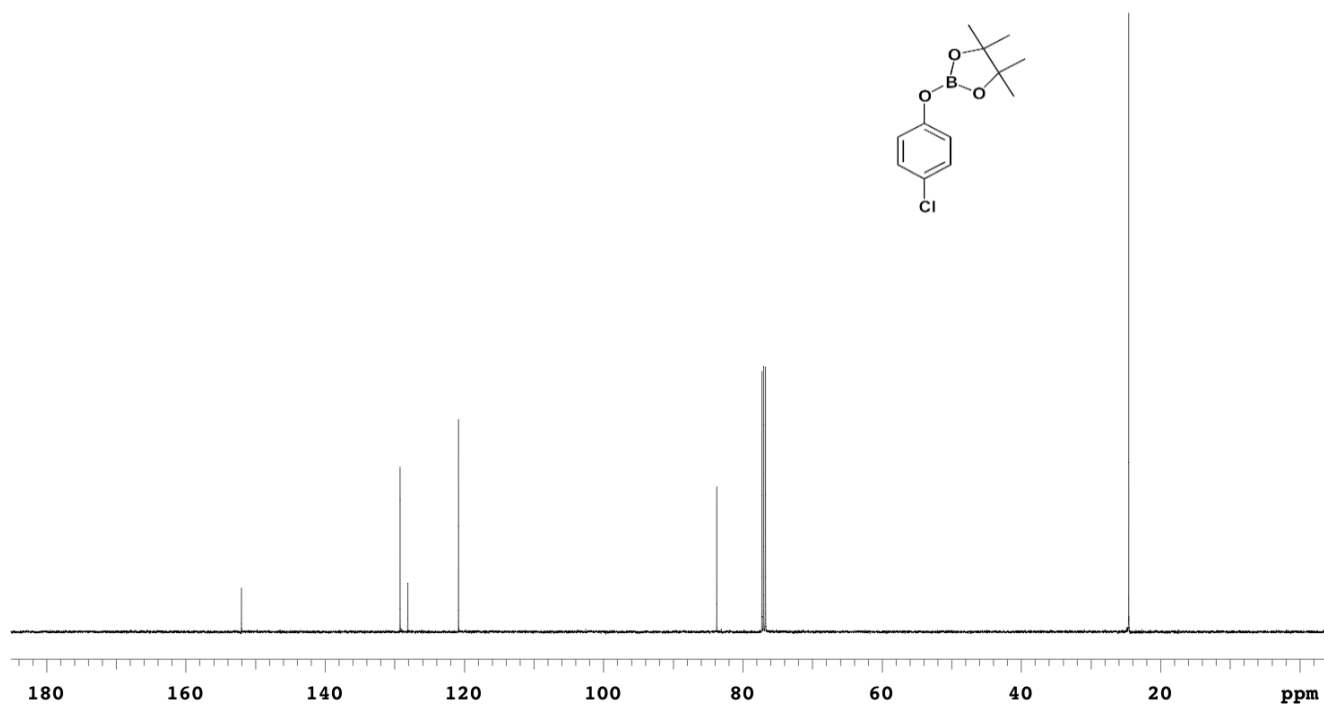

$^{13}\text{C}$ -NMR (125 MHz,  $\text{CDCl}_3$ )



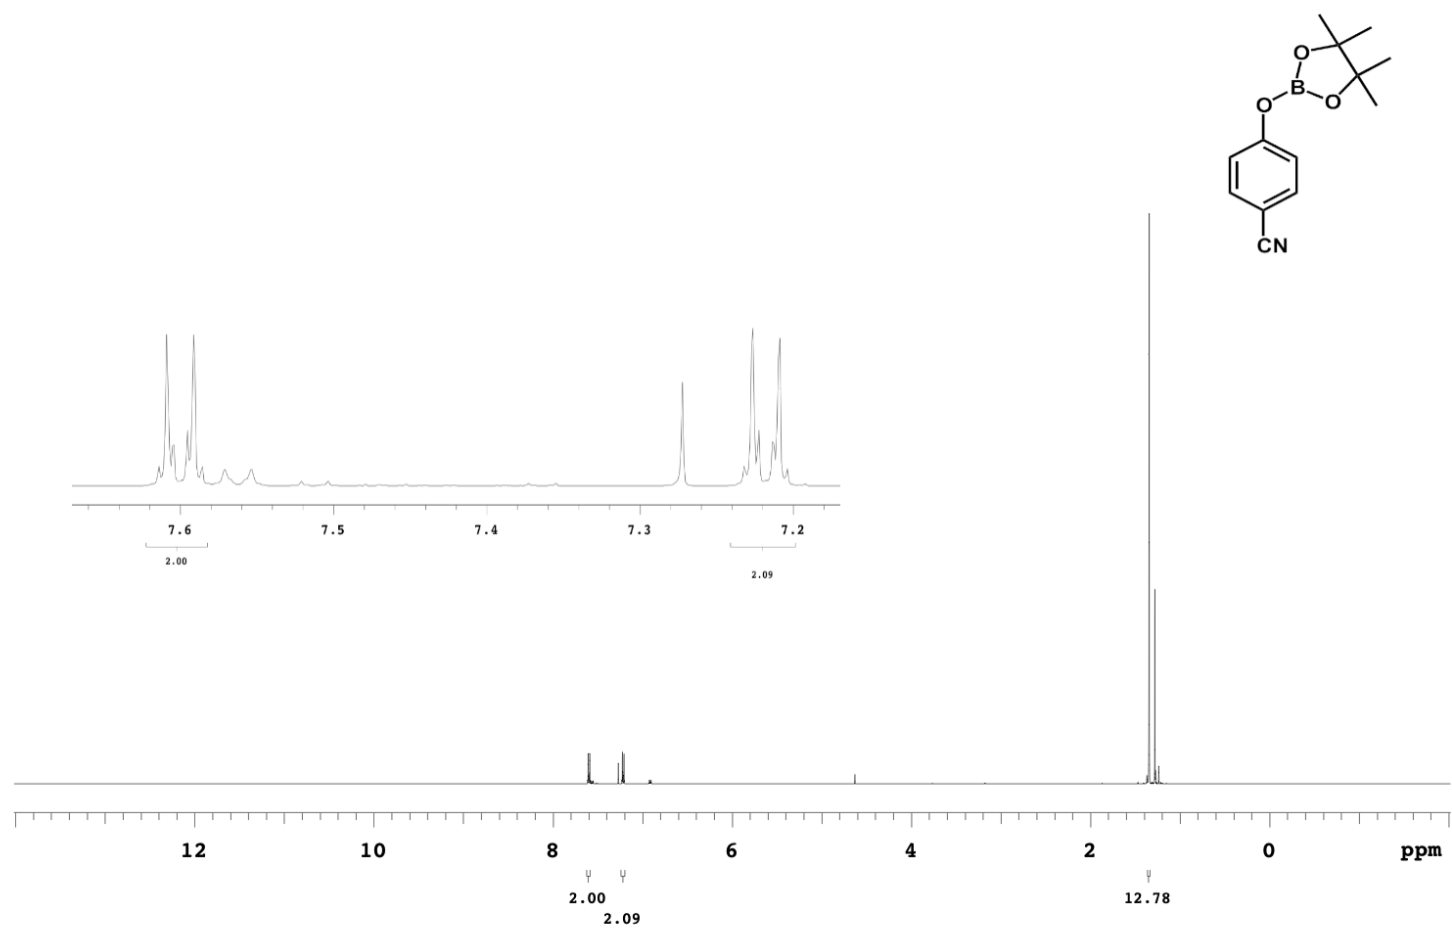

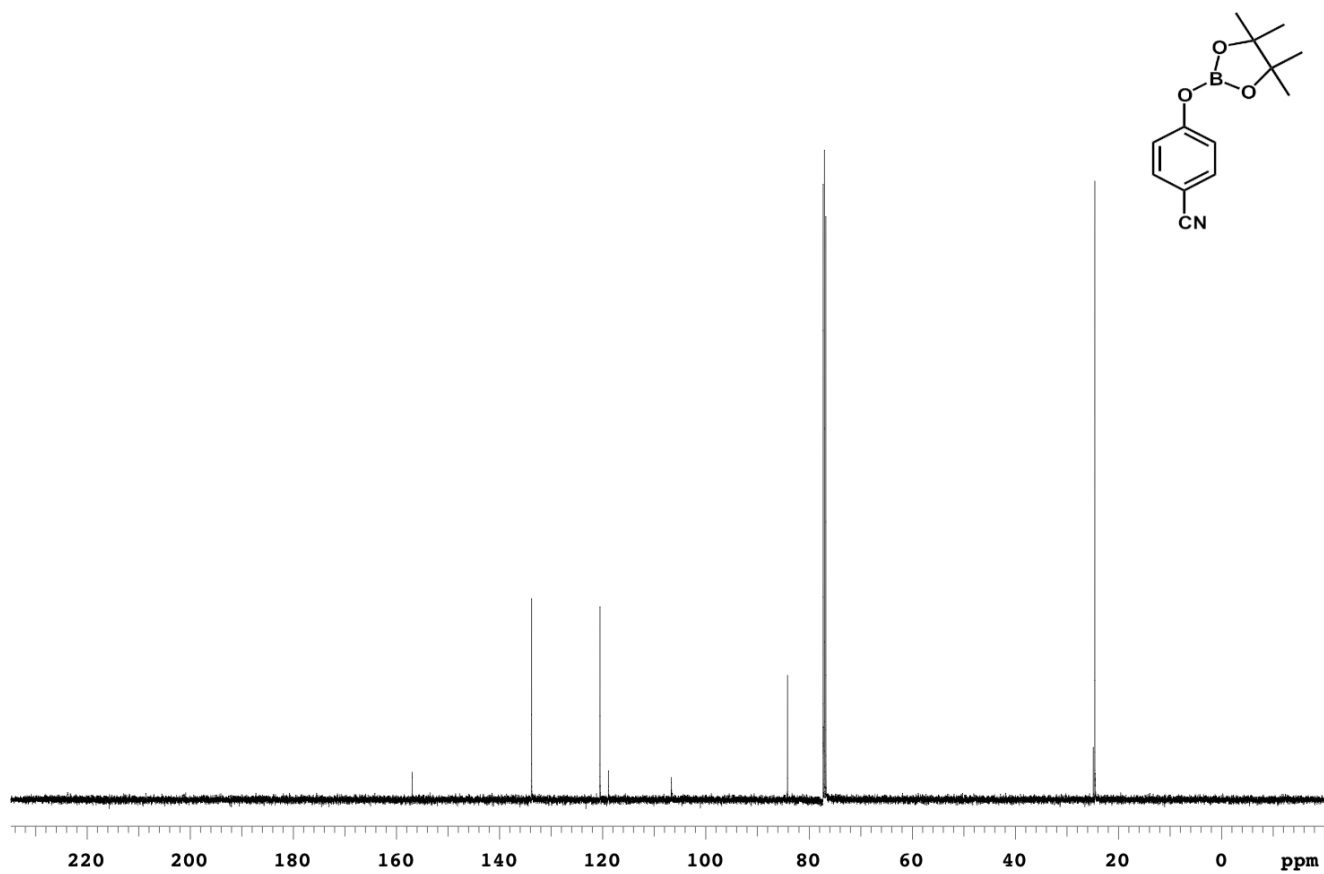

$^{13}\text{C}$  NMR (125 MHz,  $\text{CDCl}_3$ )

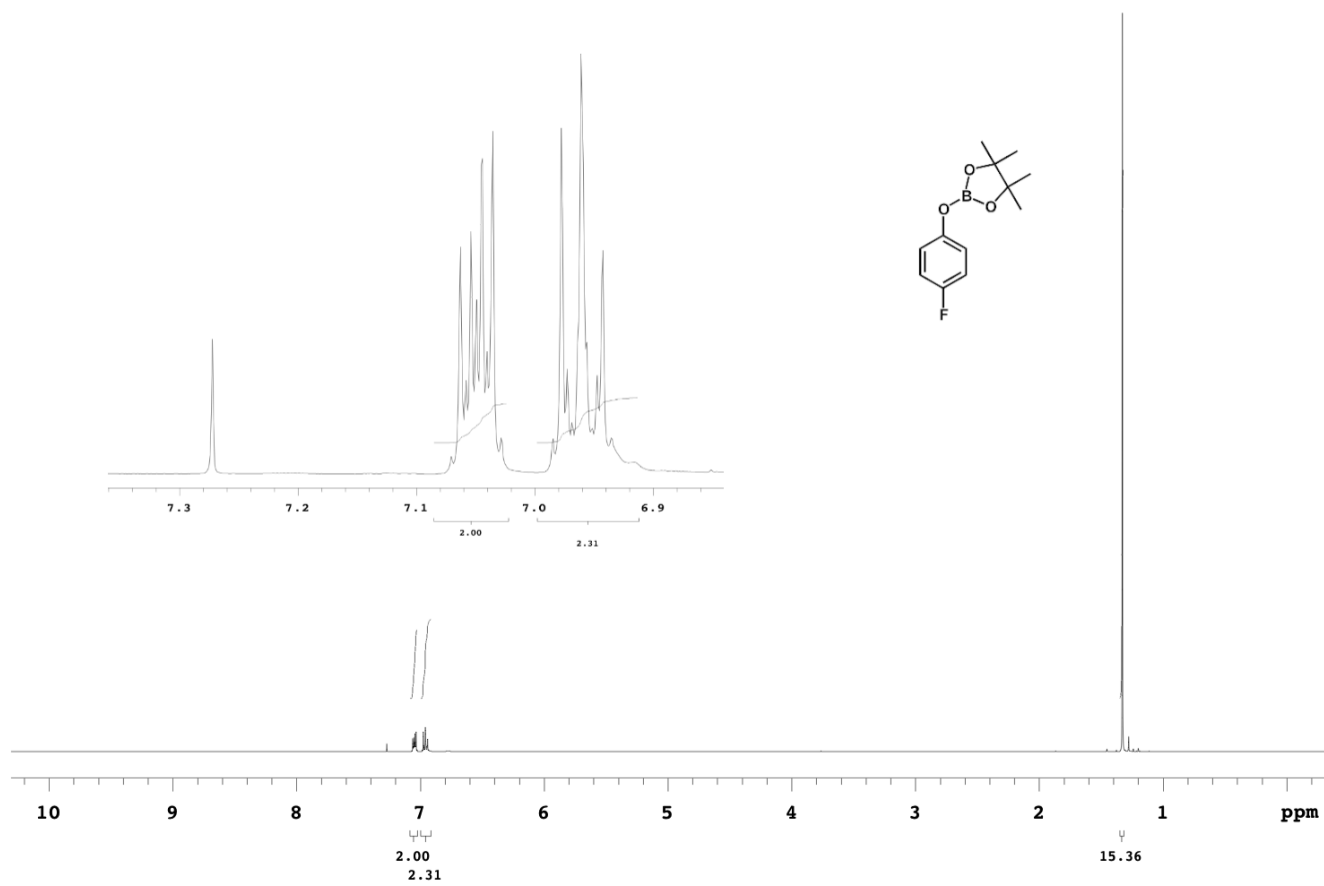

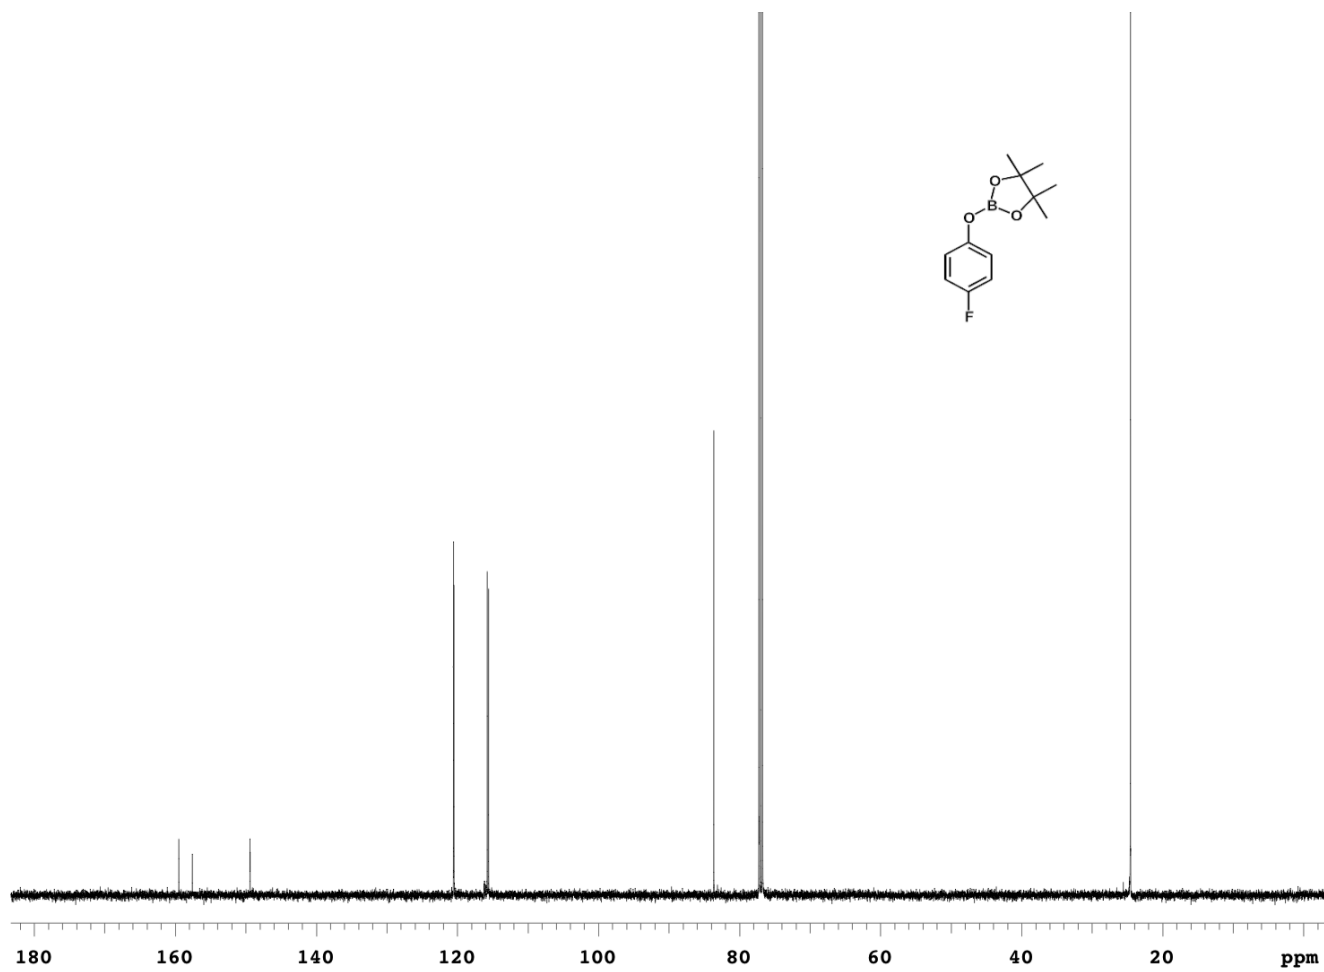



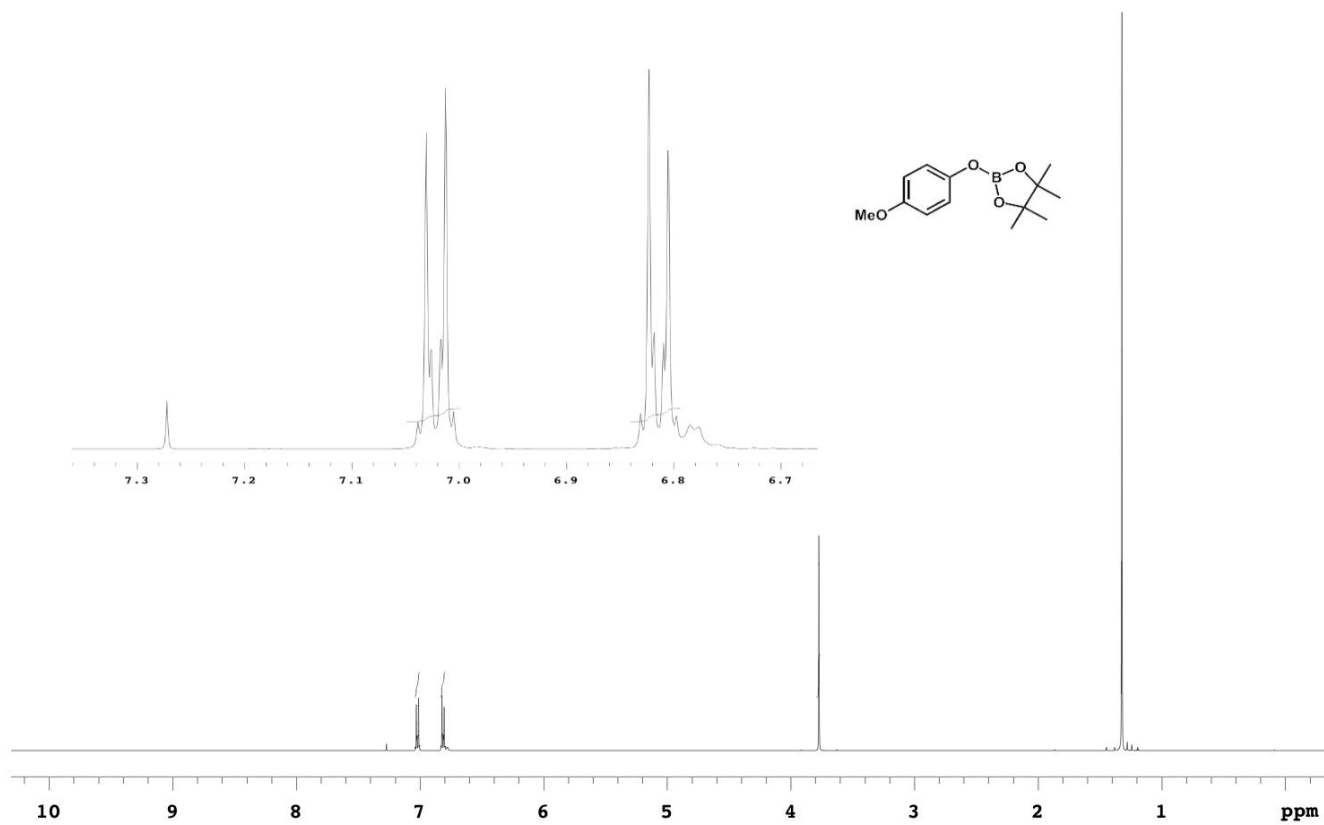

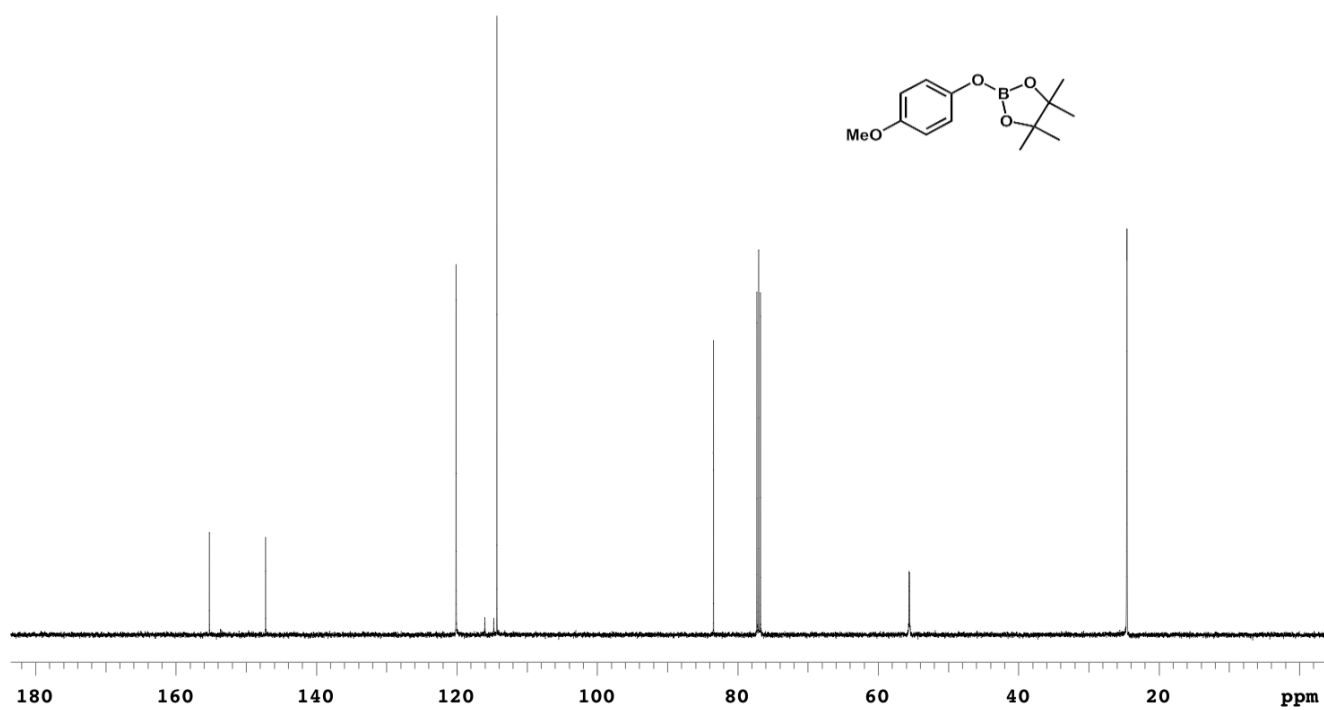

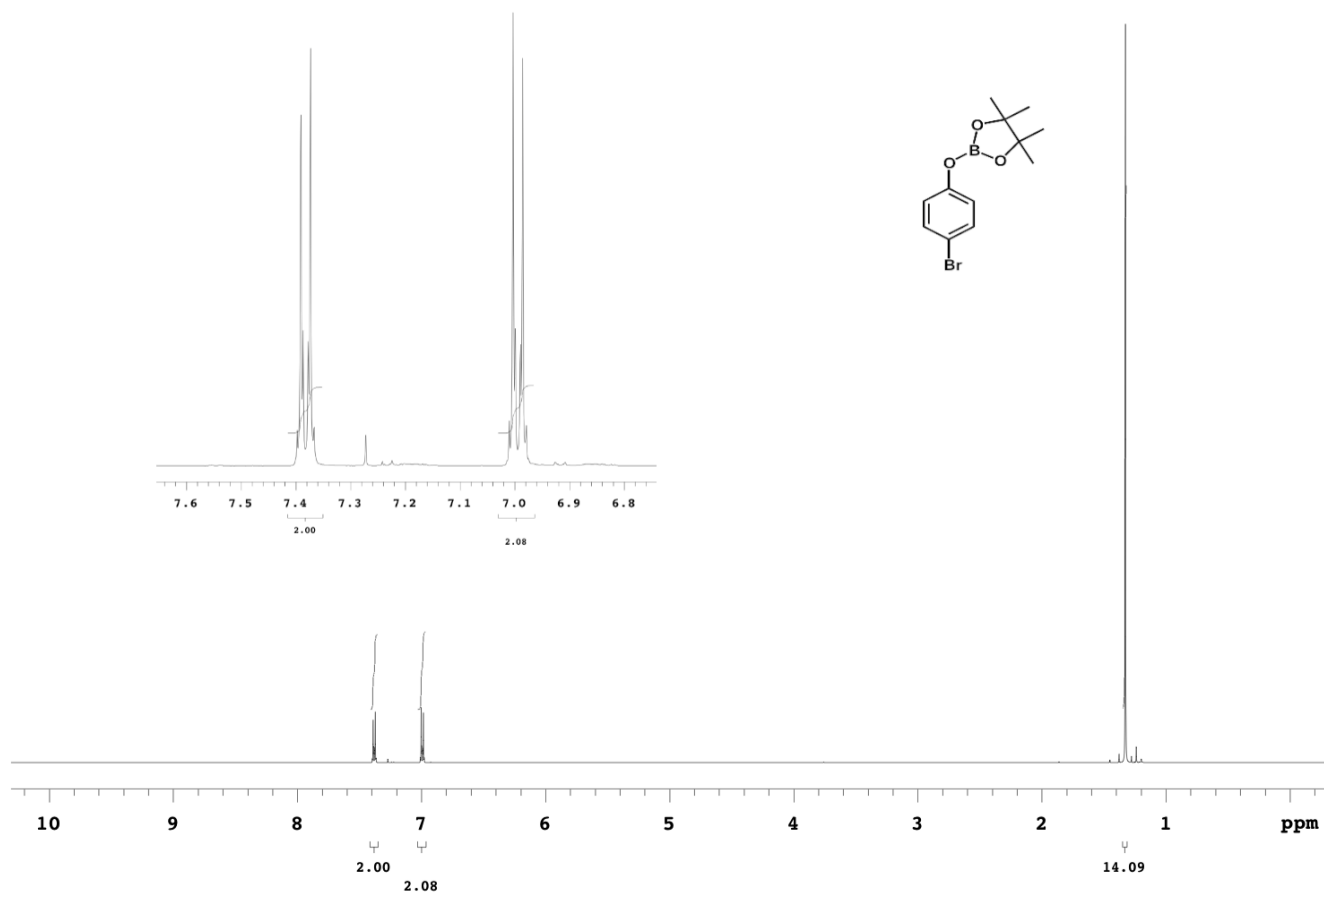

$^1\text{H-NMR}$  (500 MHz,  $\text{CDCl}_3$ )

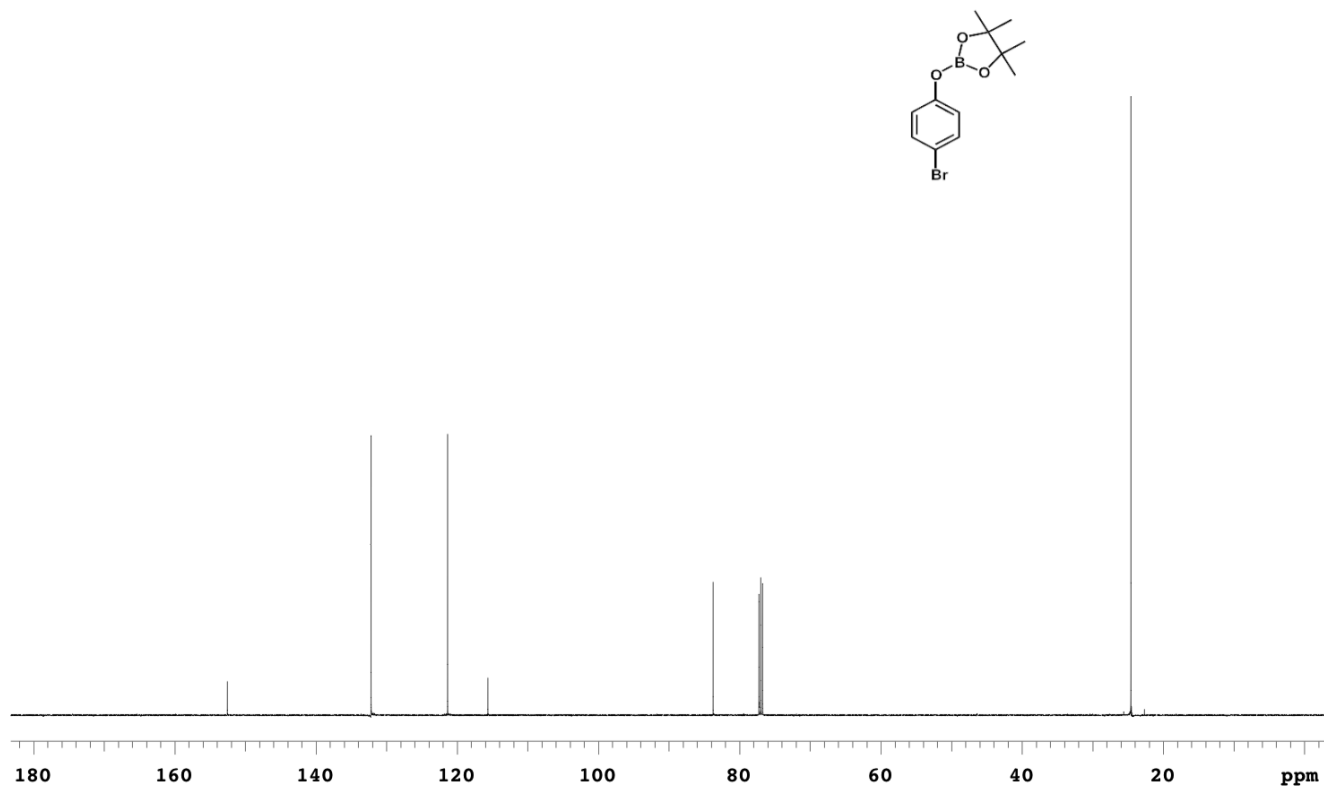

$^{13}\text{C}$ -NMR (125 MHz,  $\text{CDCl}_3$ )

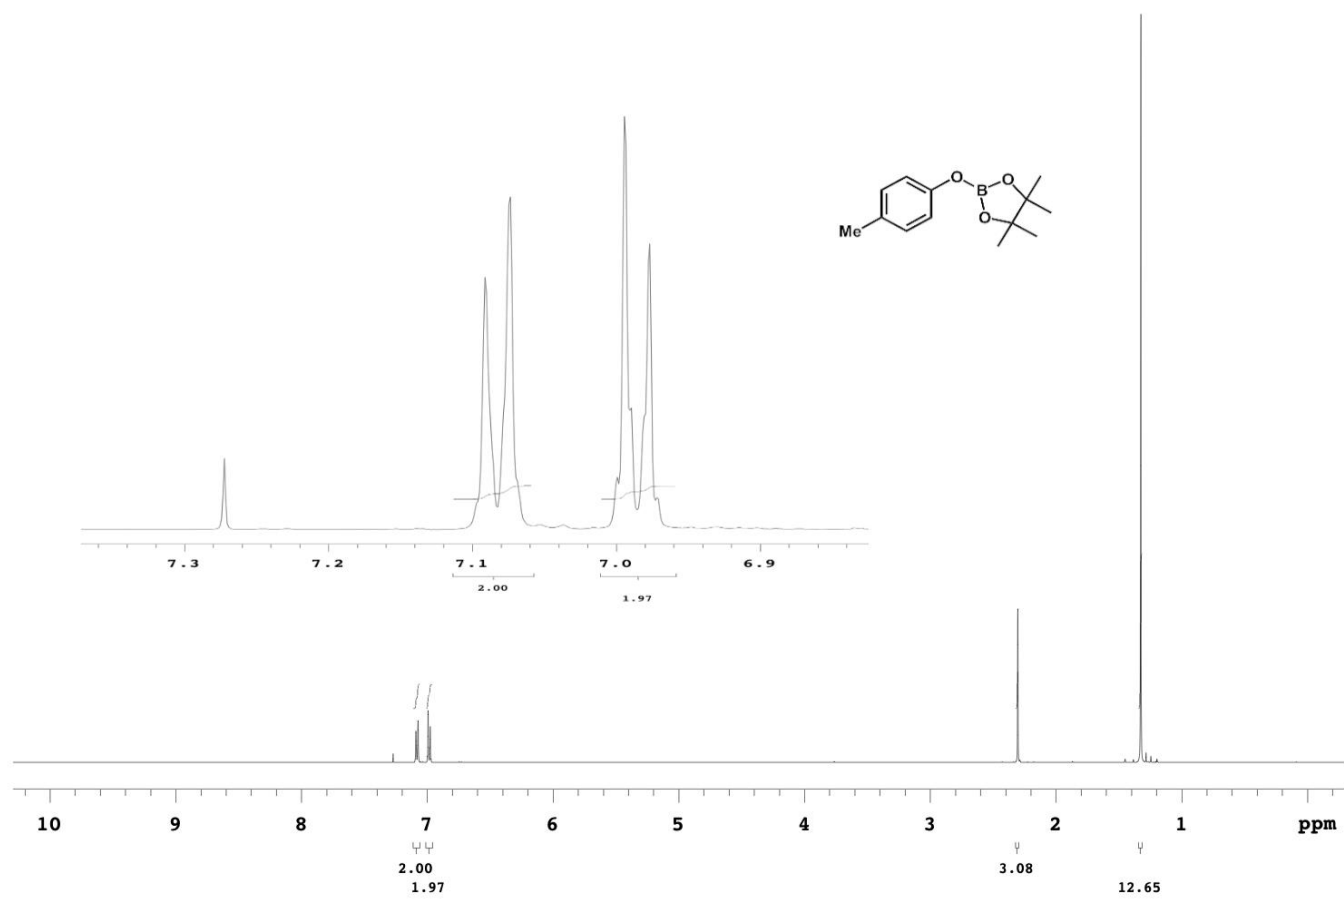

$^1\text{H-NMR}$  (500 MHz,  $\text{CDCl}_3$ )

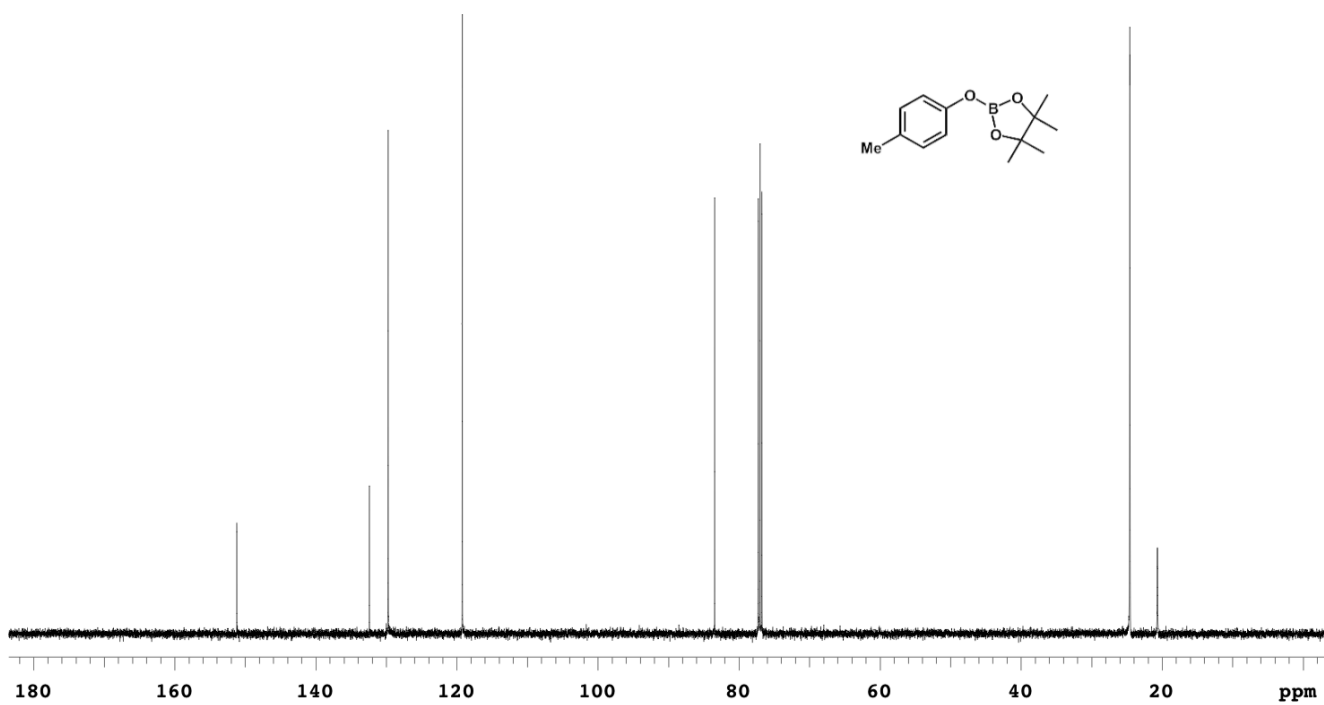

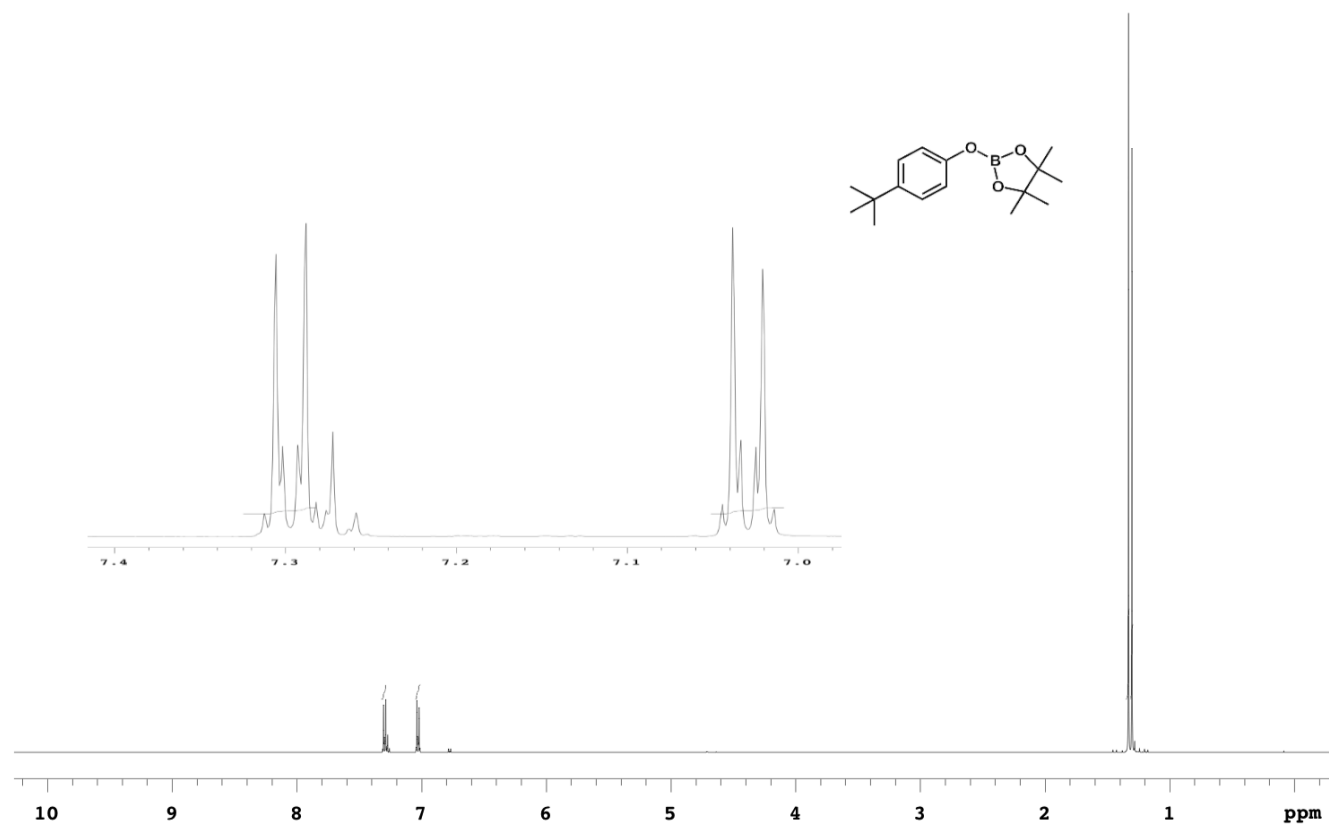

$^1\text{H-NMR}$  (500 MHz,  $\text{CDCl}_3$ )

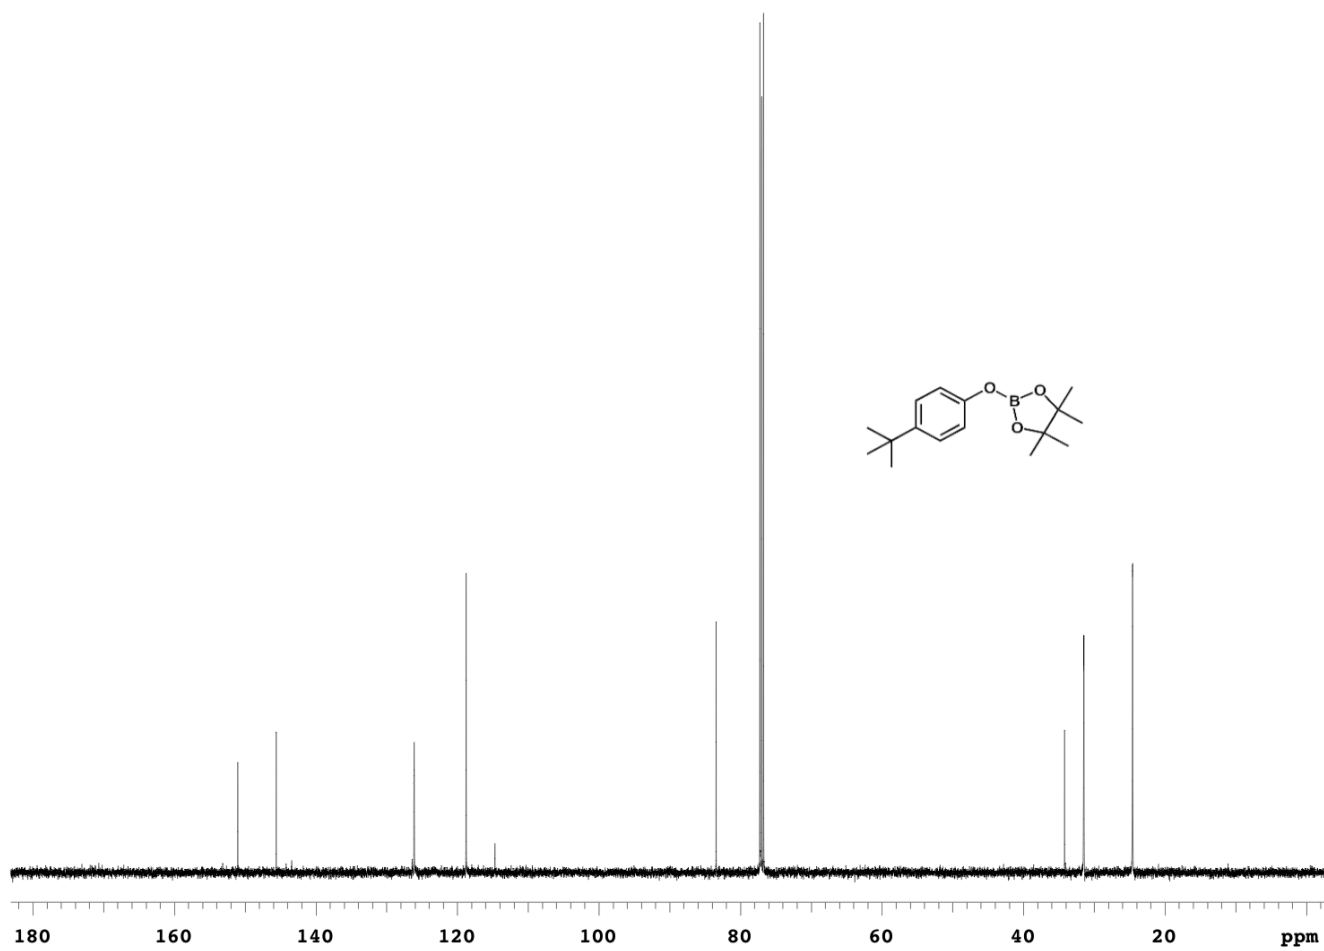

$^{13}\text{C}$ -NMR (125 MHz,  $\text{CDCl}_3$ )



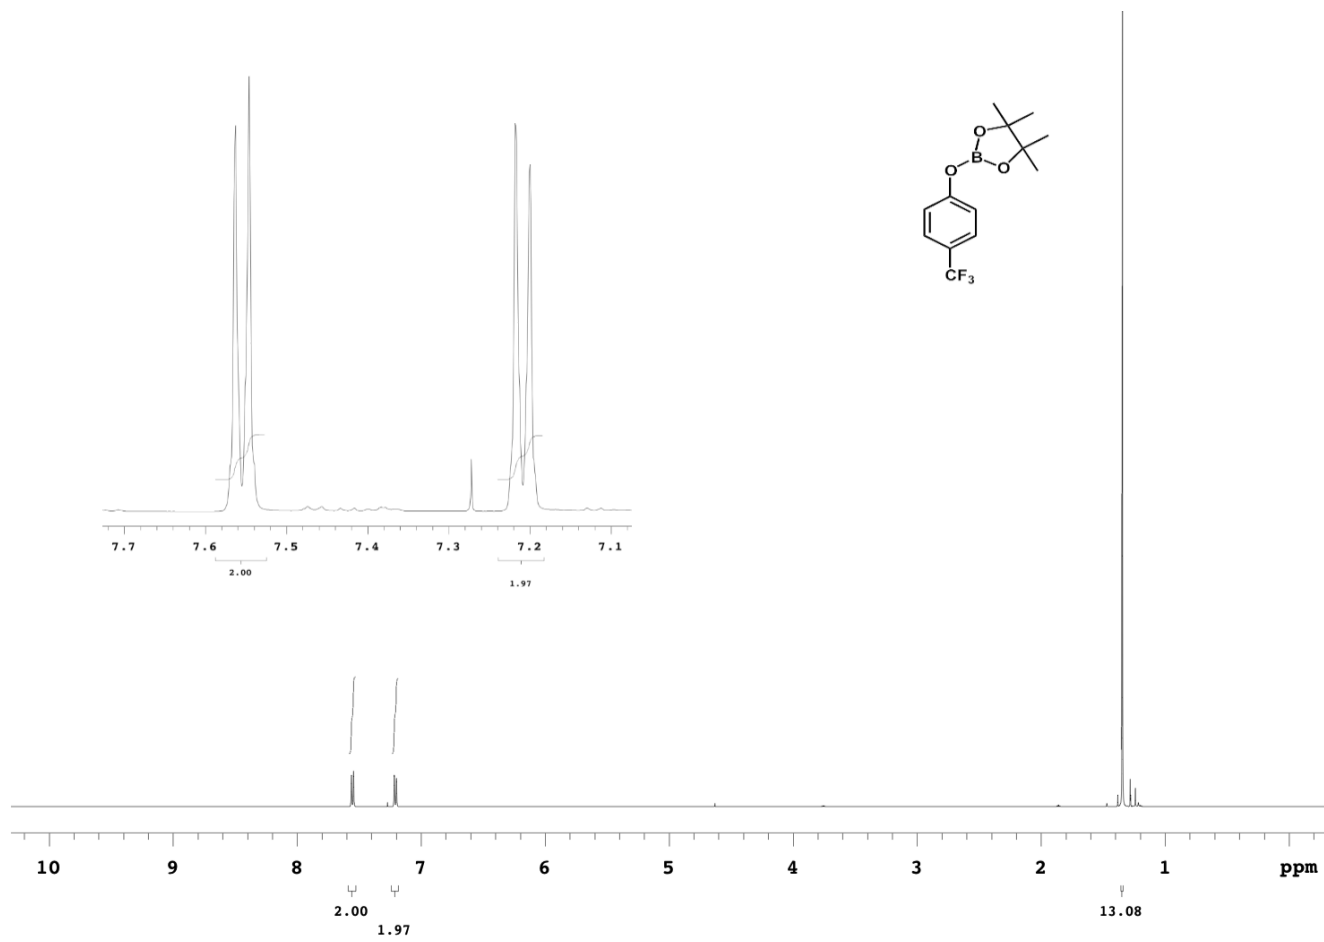

$^1\text{H-NMR}$  (500 MHz,  $\text{CDCl}_3$ )

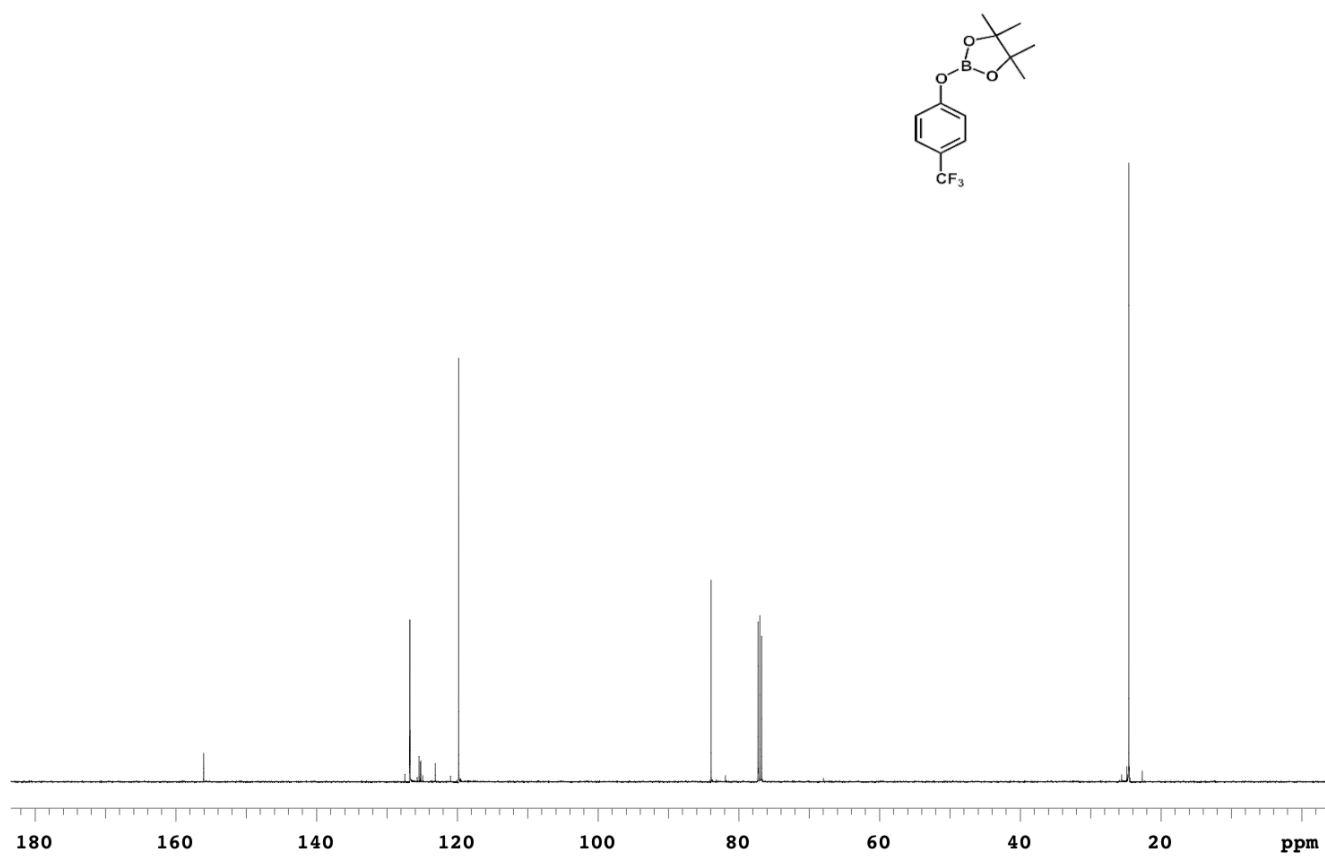

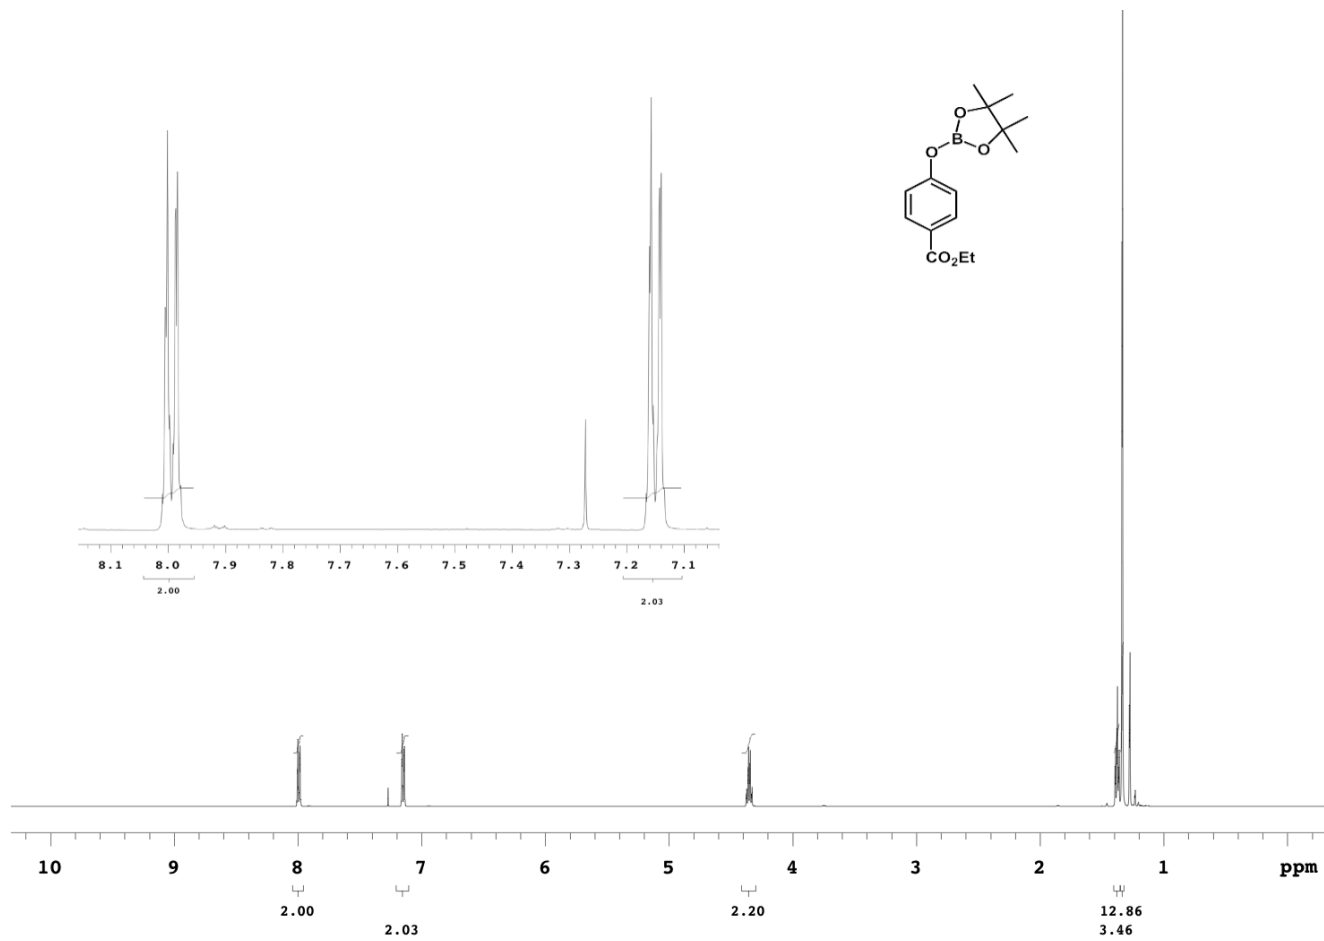

$^1\text{H-NMR}$  (500 MHz,  $\text{CDCl}_3$ )

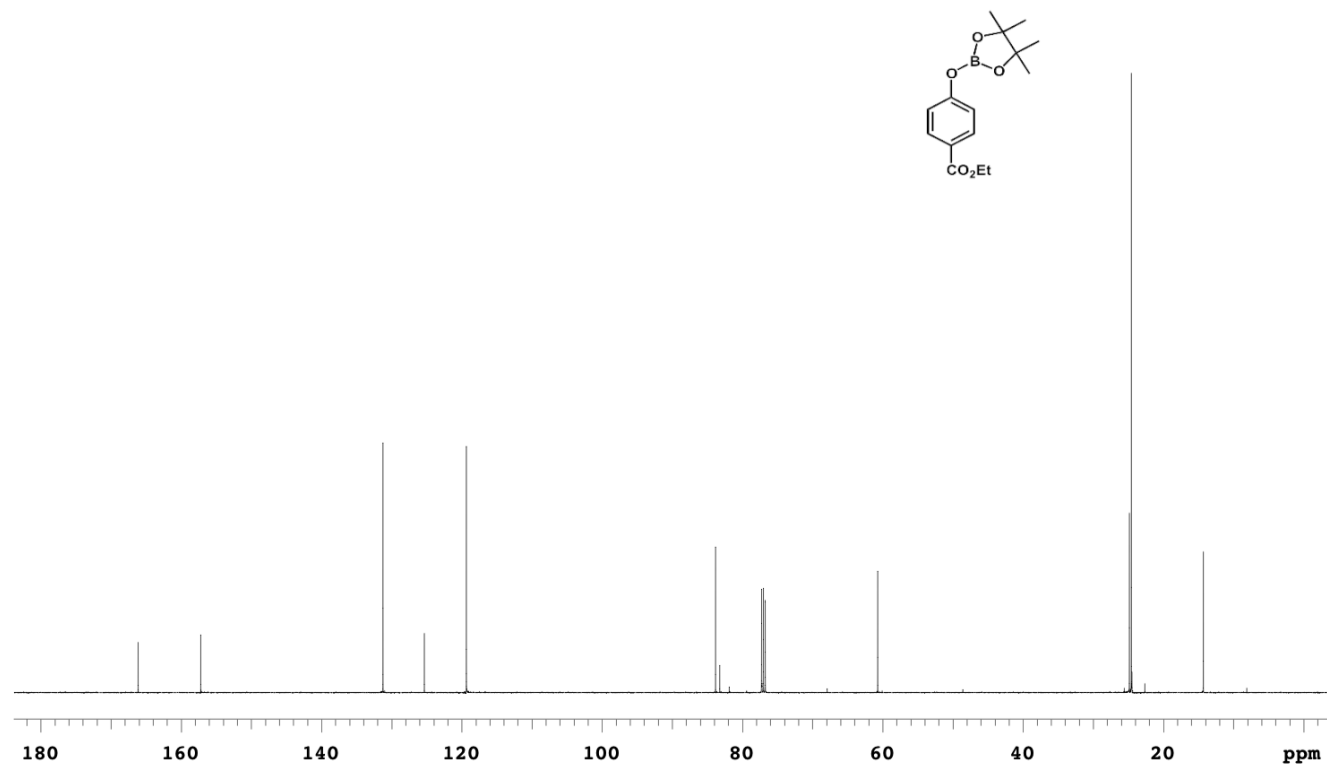

$^{13}\text{C}$ -NMR (125 MHz,  $\text{CDCl}_3$ )

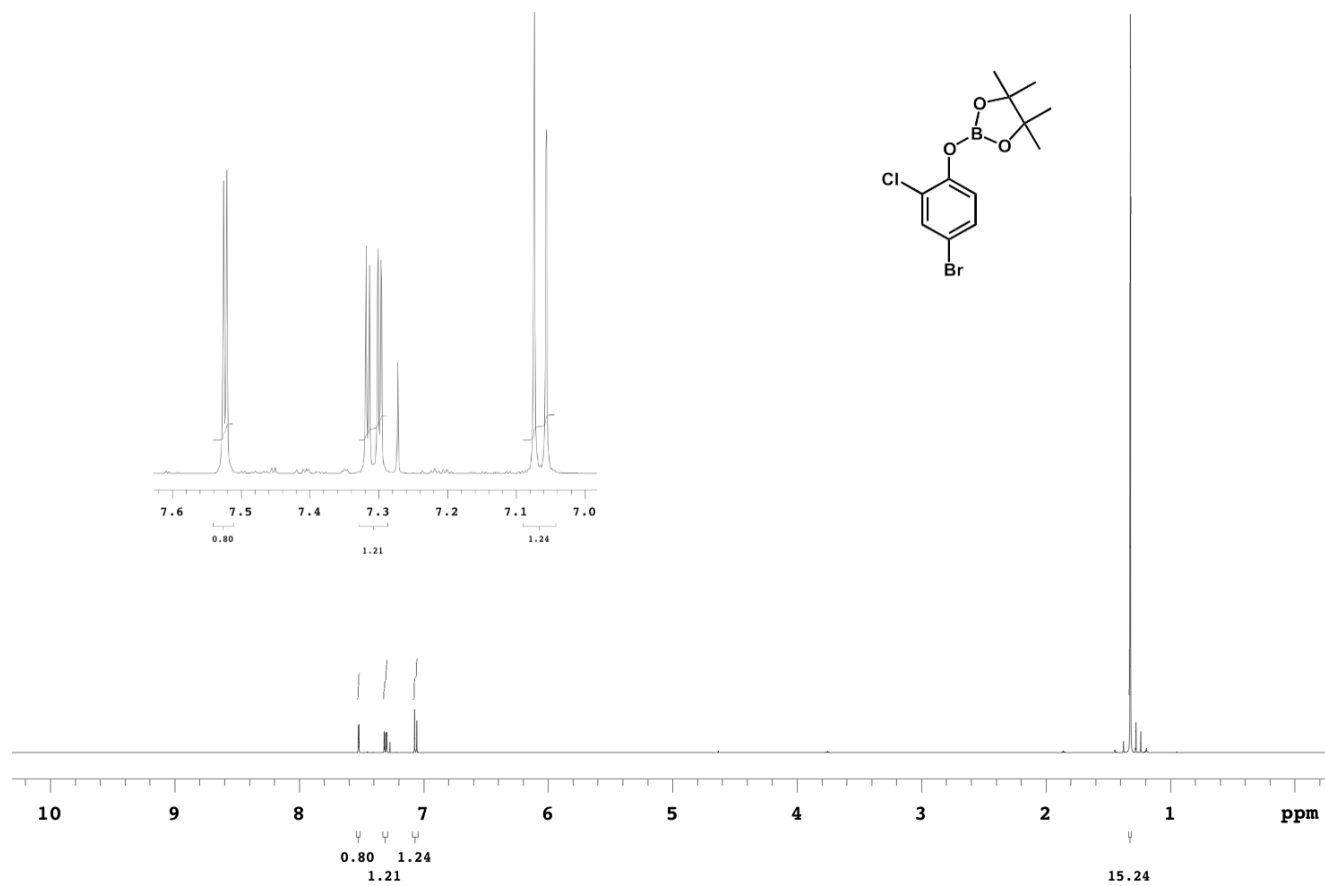

$^1\text{H-NMR}$  (500 MHz,  $\text{CDCl}_3$ )

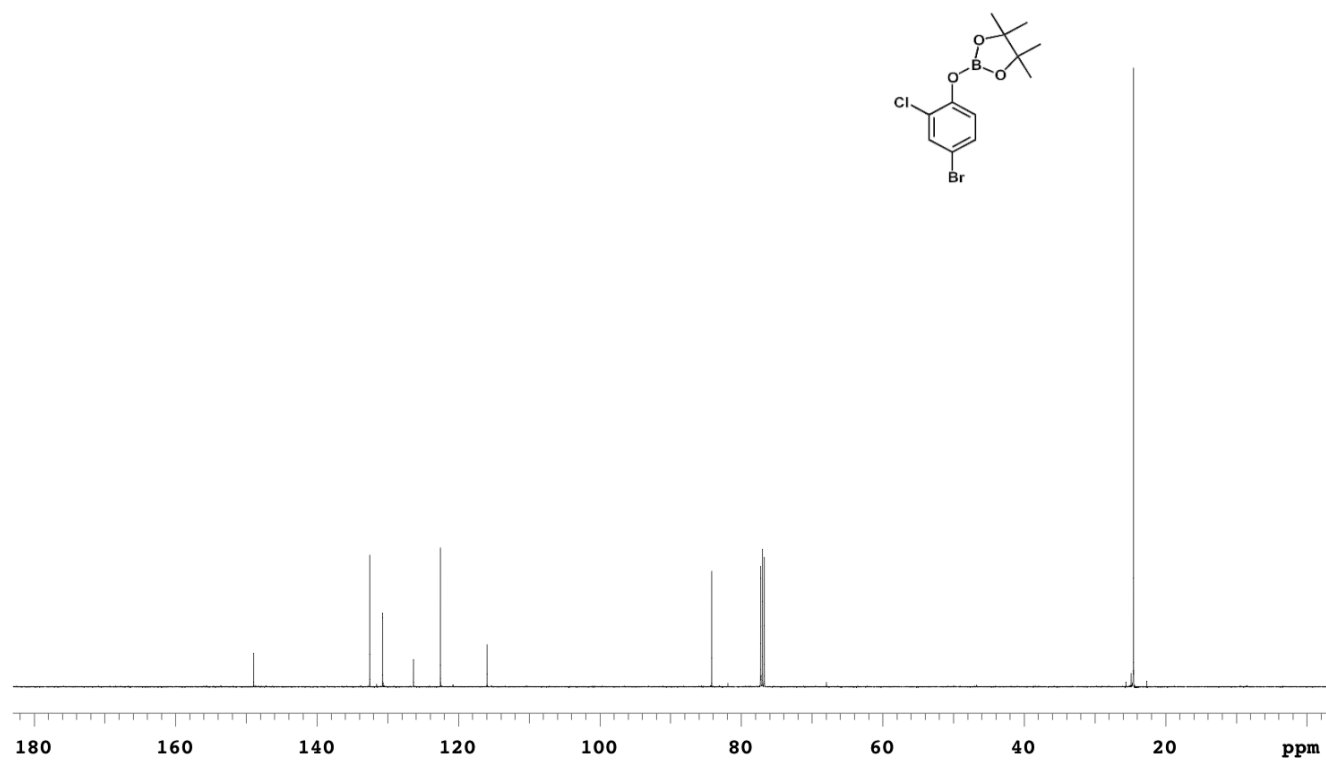

$^{13}\text{C}$ -NMR (125 MHz,  $\text{CDCl}_3$ )

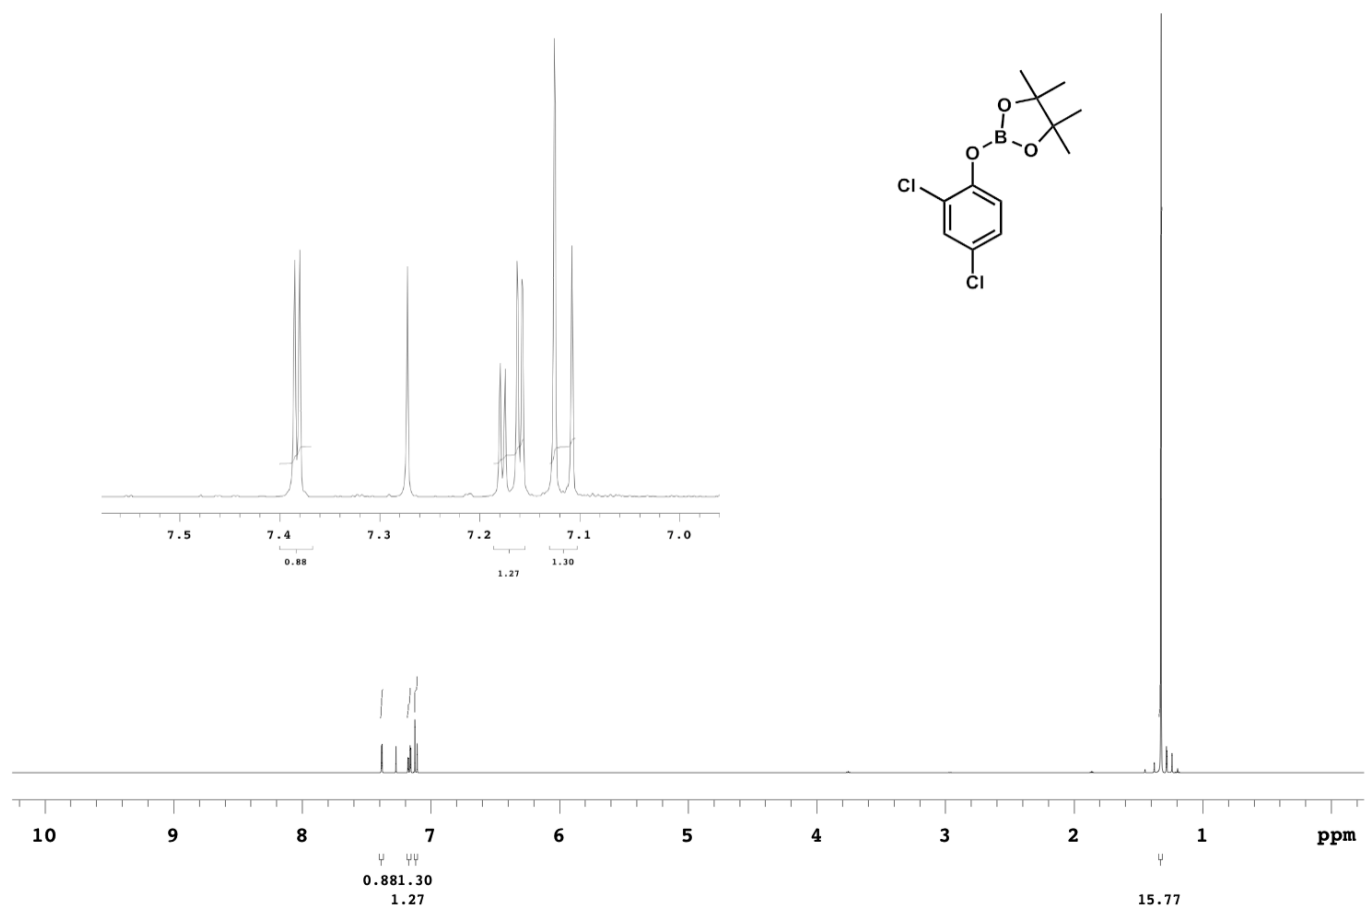

$^1\text{H-NMR}$  (500 MHz,  $\text{CDCl}_3$ )

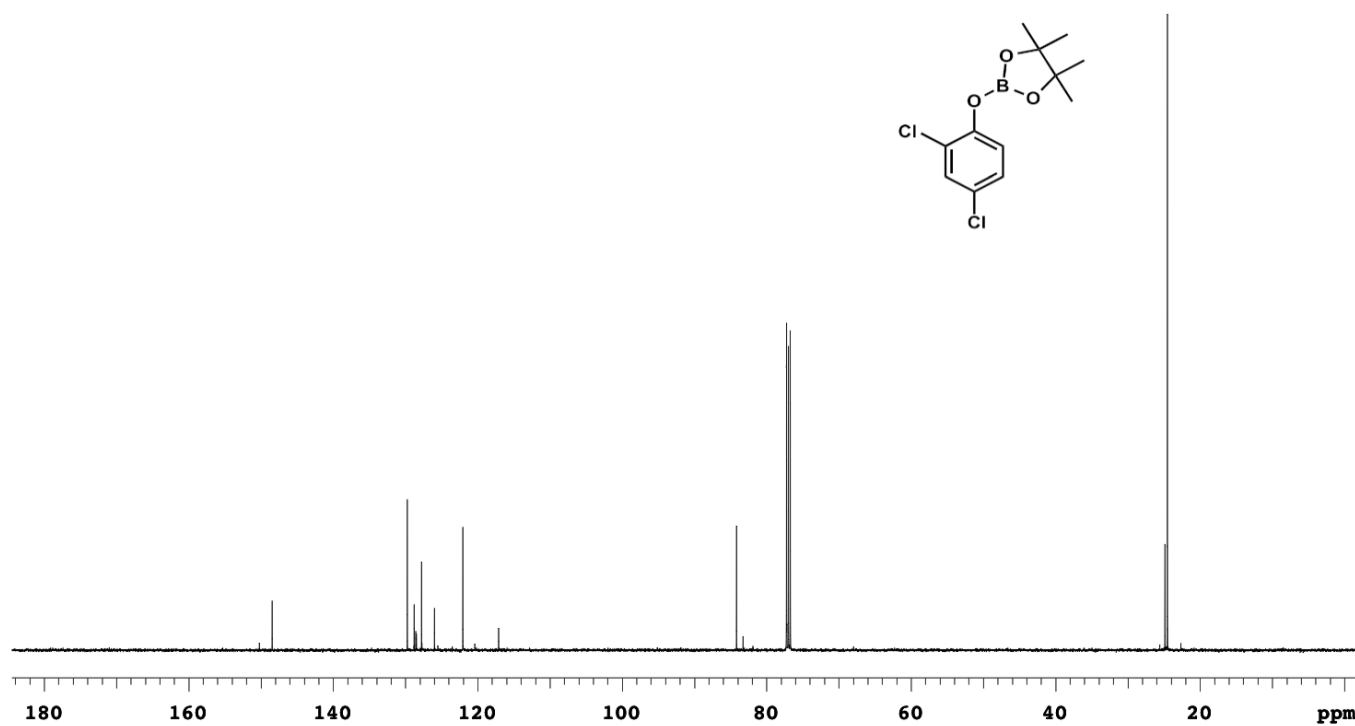

$^{13}\text{C}$  NMR (125 MHz,  $\text{CDCl}_3$ )



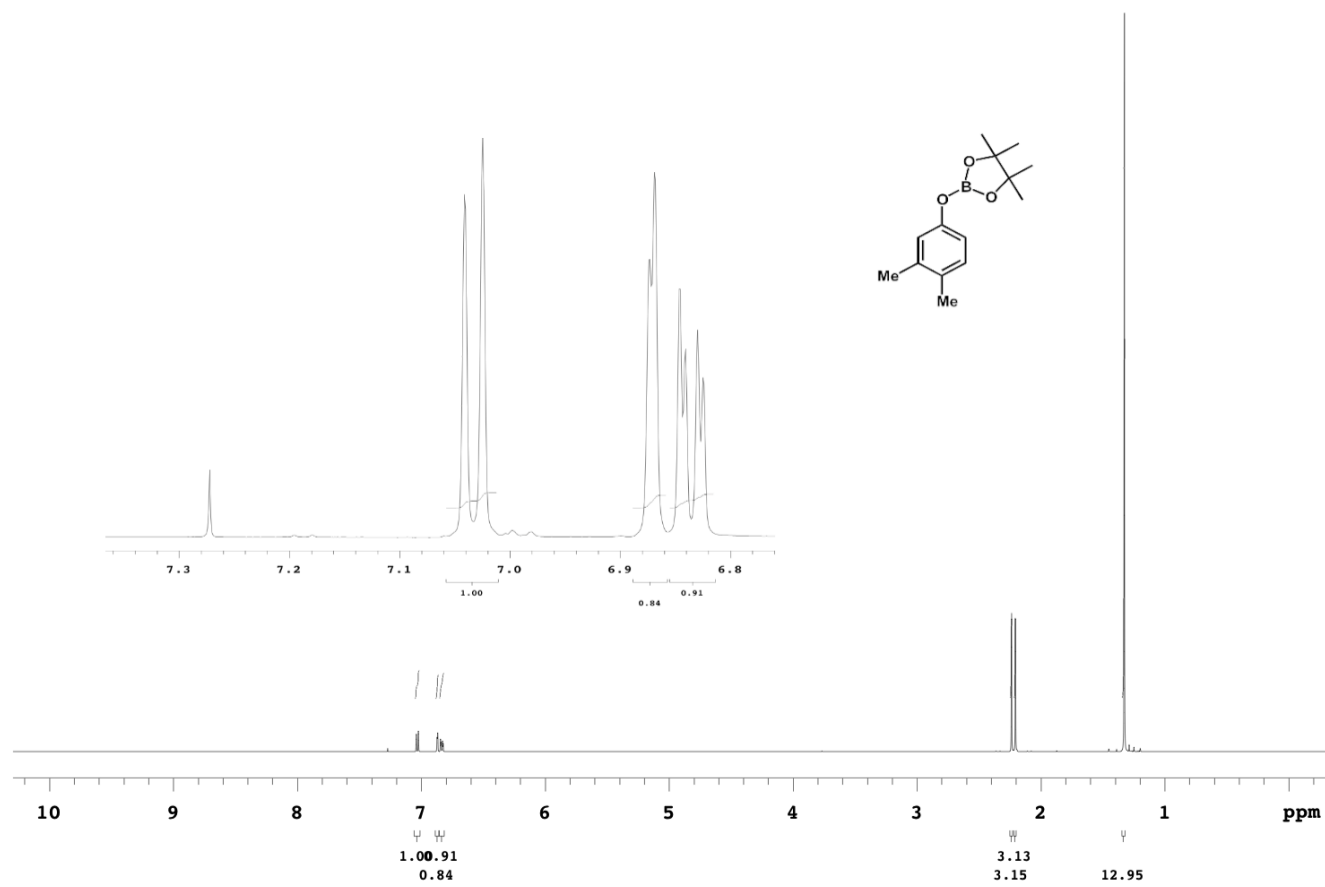

$^1\text{H-NMR}$  (500 MHz,  $\text{CDCl}_3$ )

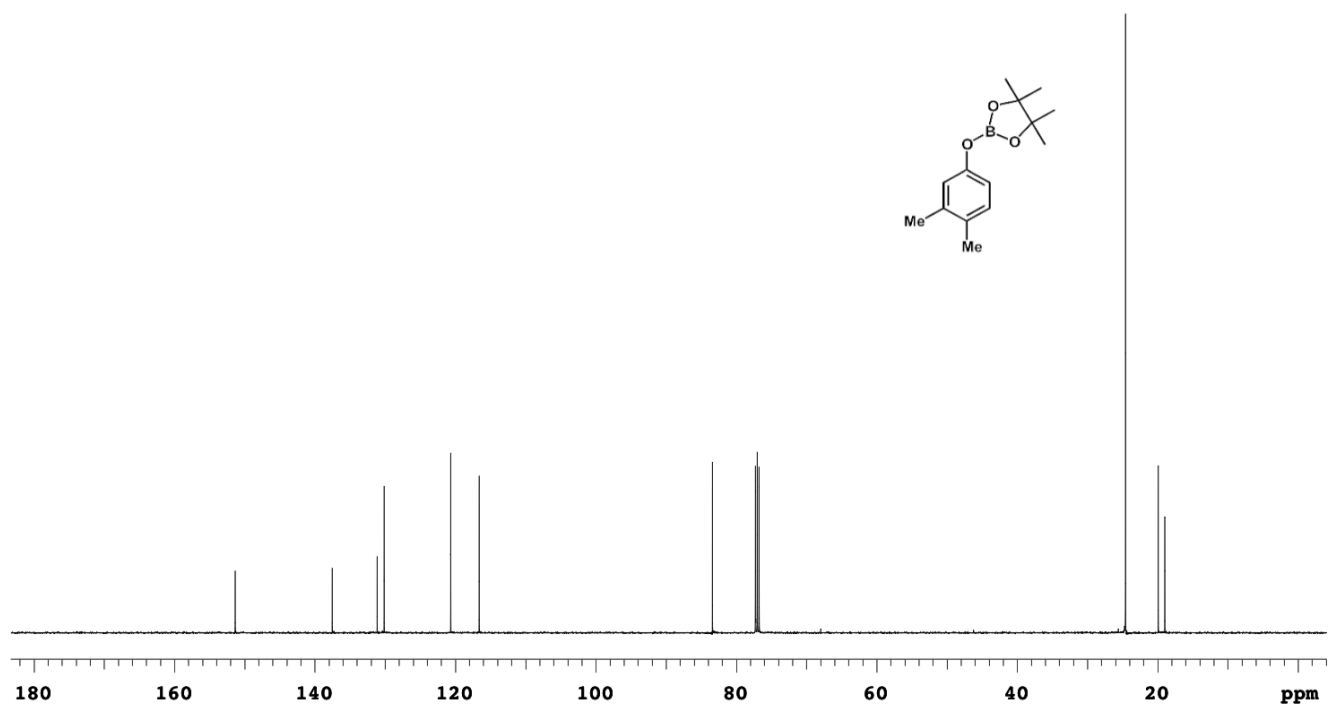

$^{13}\text{C}$ -NMR (125 MHz,  $\text{CDCl}_3$ )



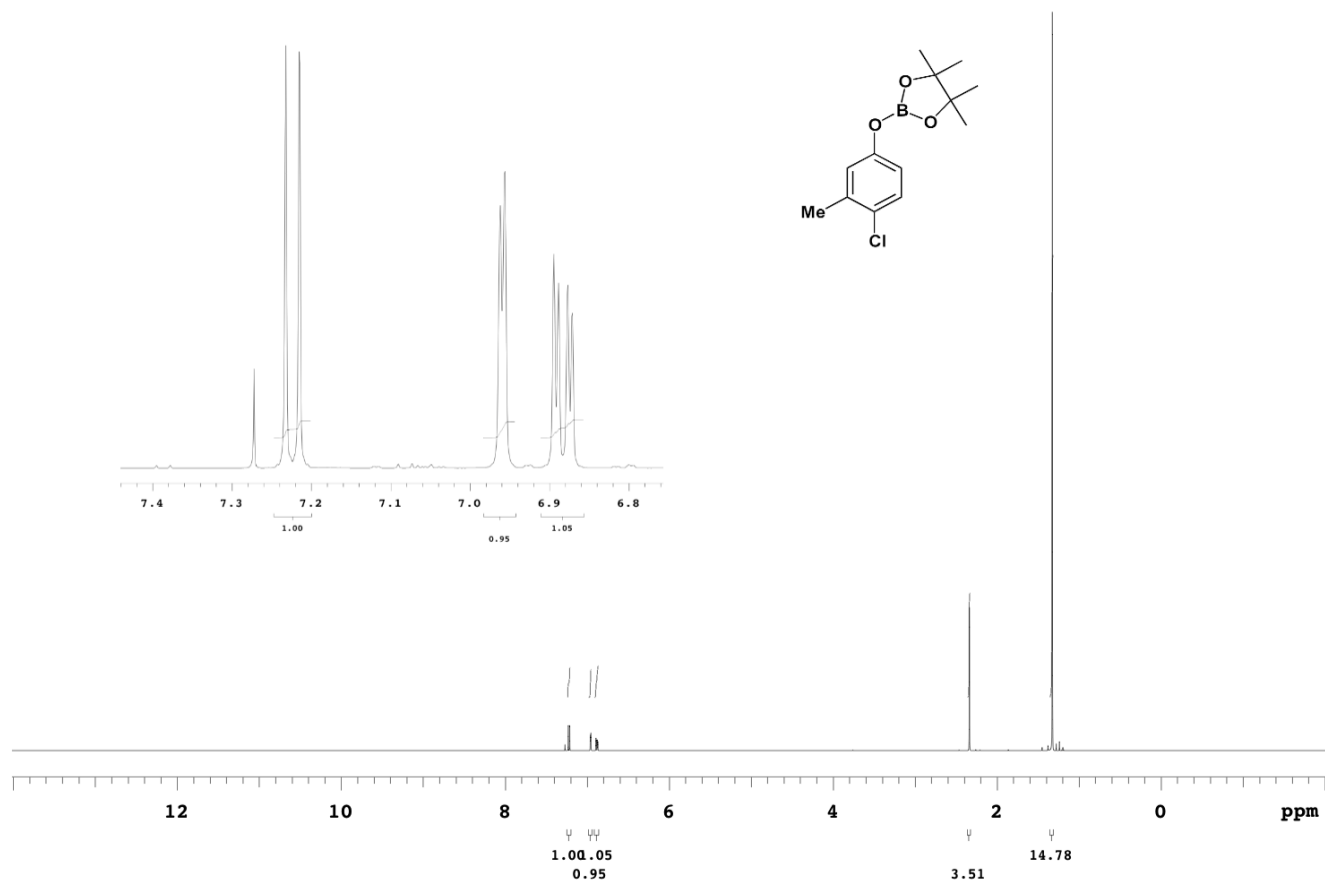

$^1\text{H-NMR}$  (500 MHz,  $\text{CDCl}_3$ )

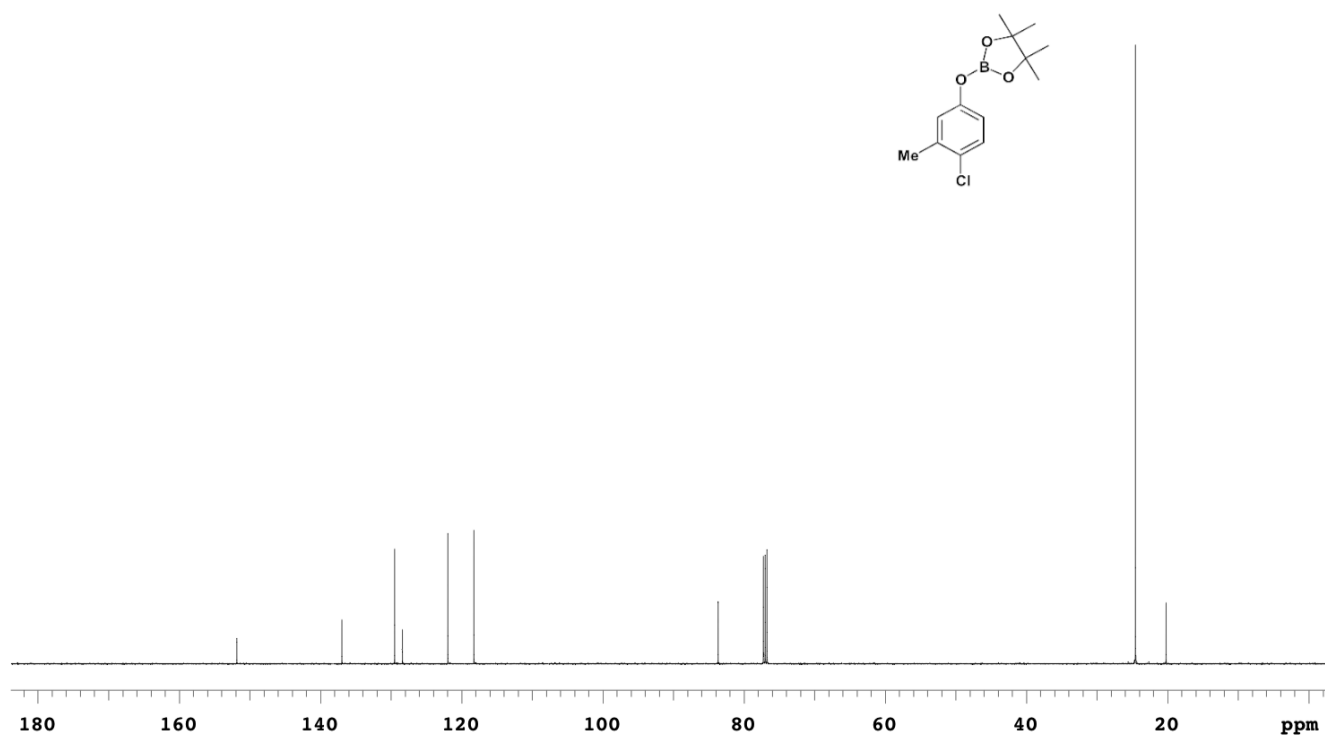

$^{13}\text{C}$ -NMR (125 MHz,  $\text{CDCl}_3$ )

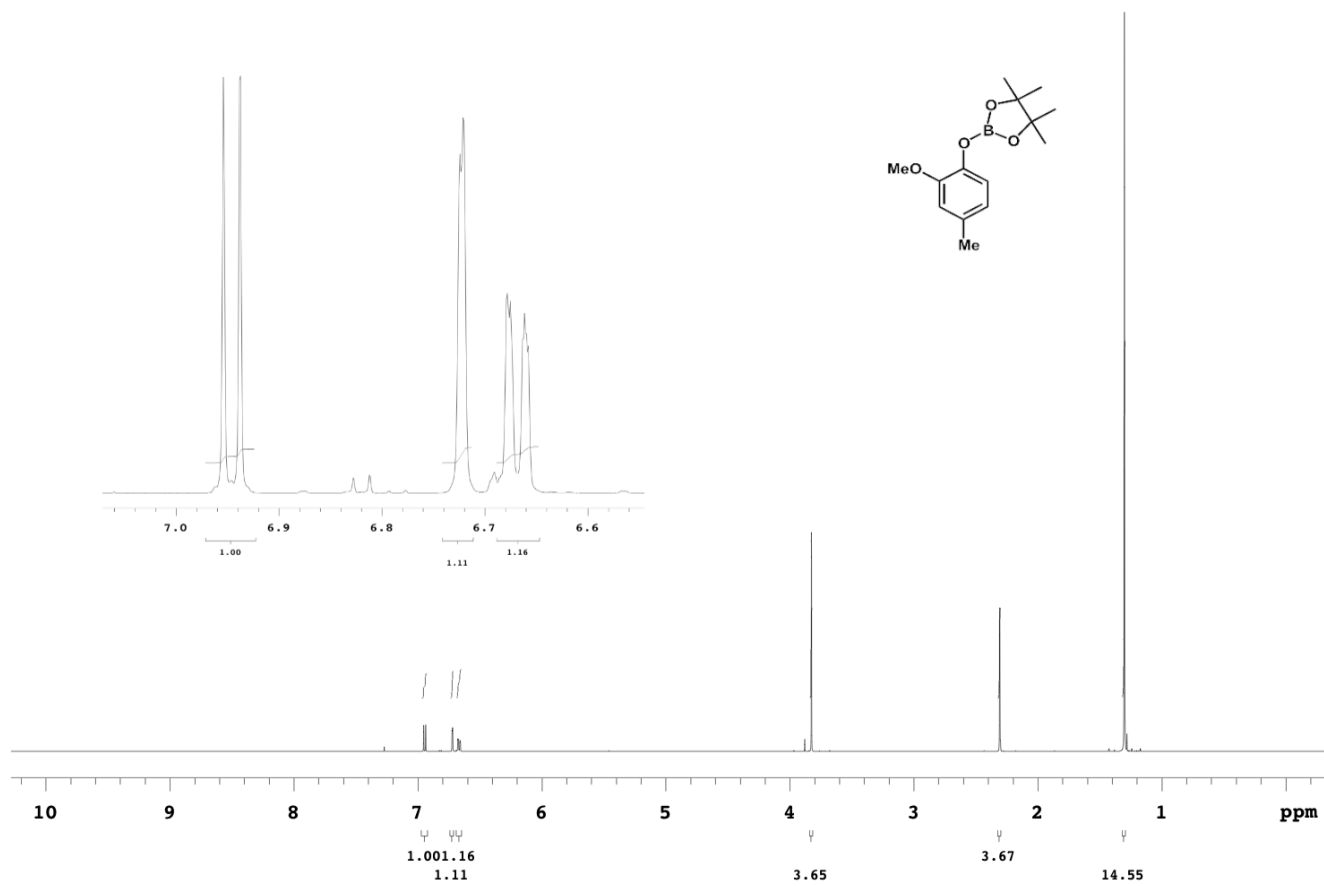

$^1\text{H-NMR}$  (500 MHz,  $\text{CDCl}_3$ )

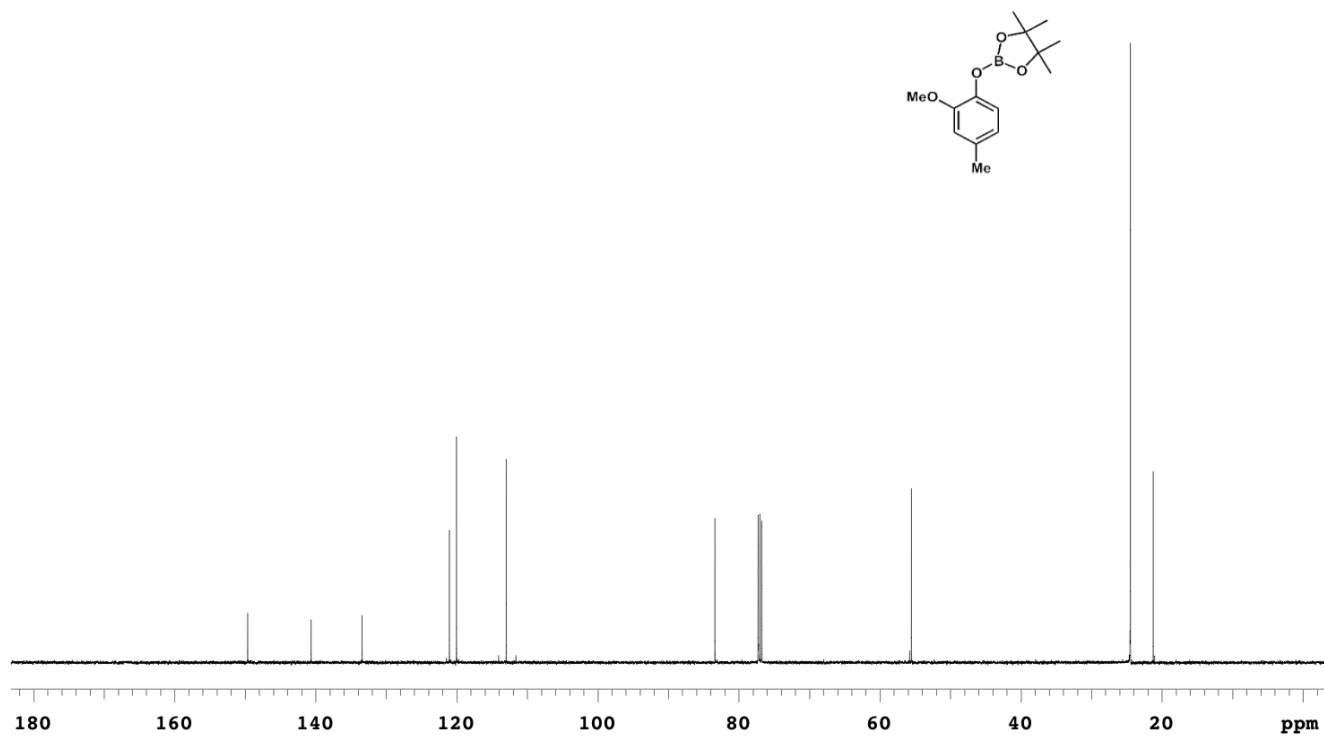

$^{13}\text{C}$ -NMR (125 MHz,  $\text{CDCl}_3$ )

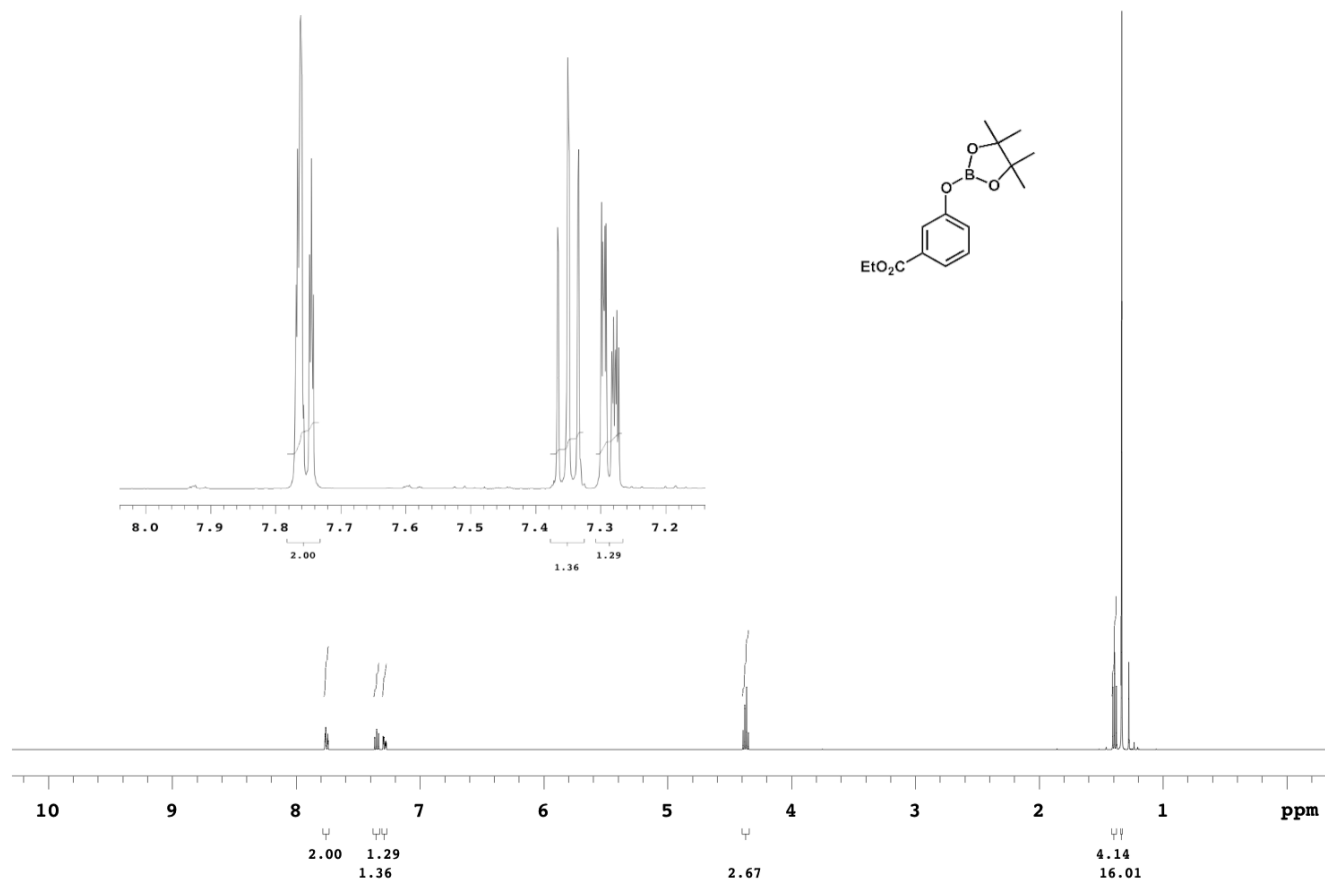

$^1\text{H-NMR}$  (500 MHz,  $\text{CDCl}_3$ )



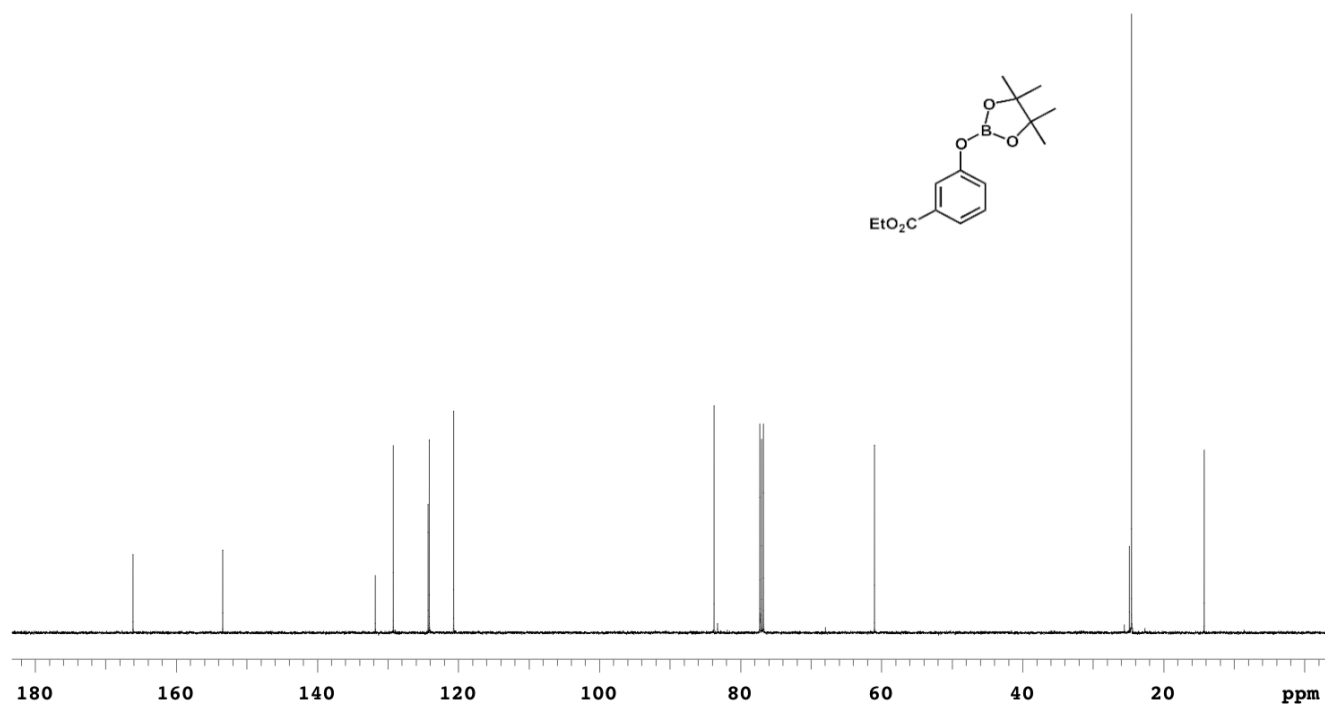

$^{13}\text{C}$ -NMR (125 MHz,  $\text{CDCl}_3$ )

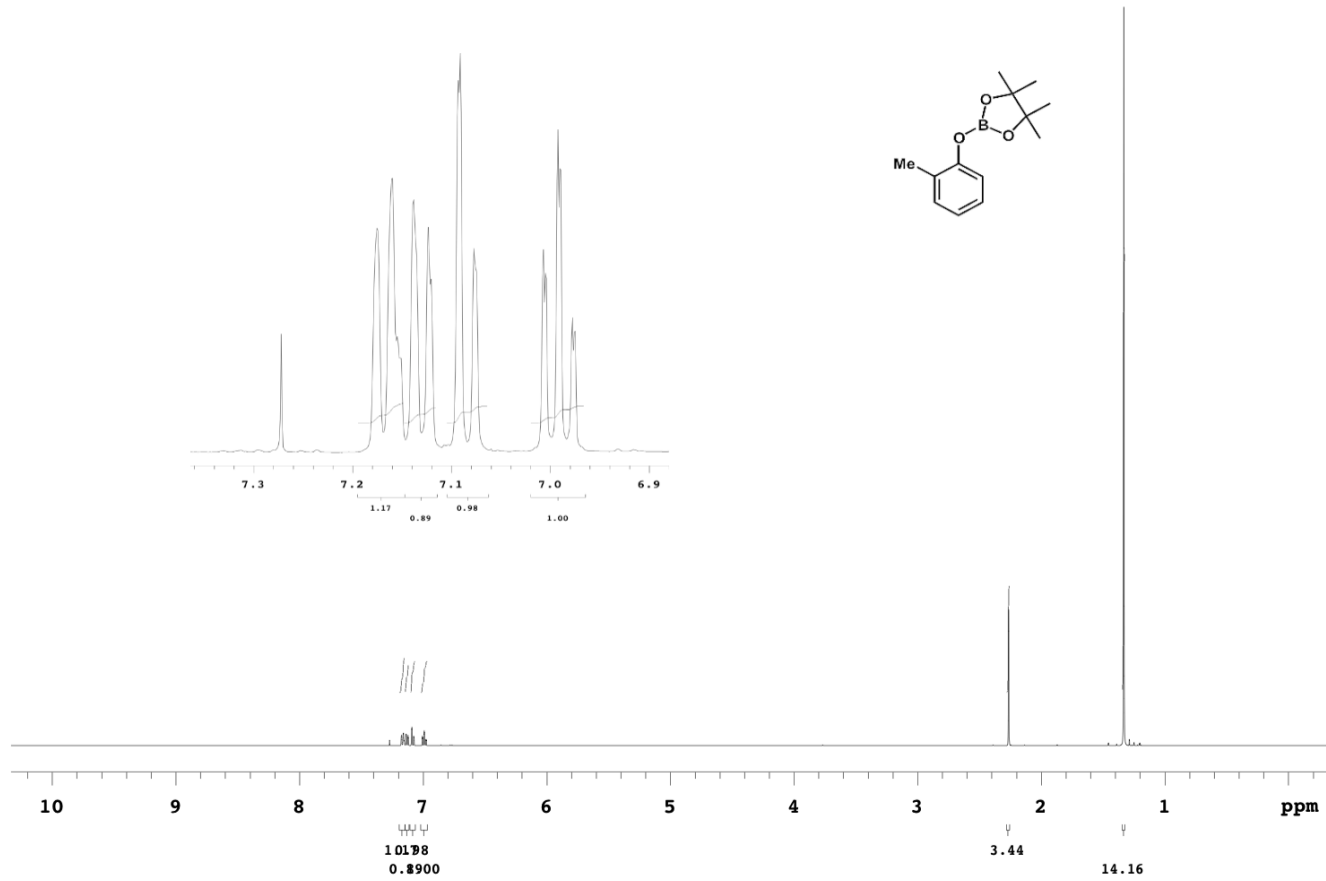

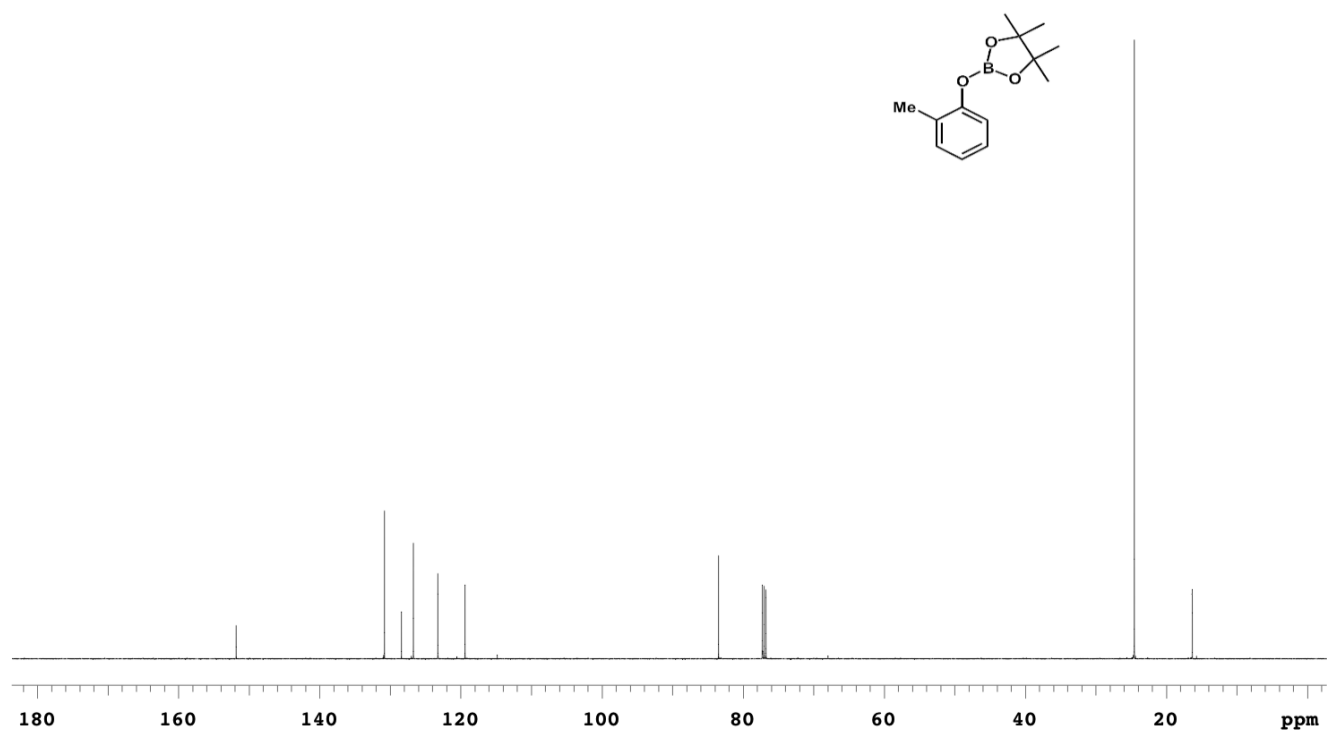

$^{13}\text{C}$ -NMR (125 MHz,  $\text{CDCl}_3$ )

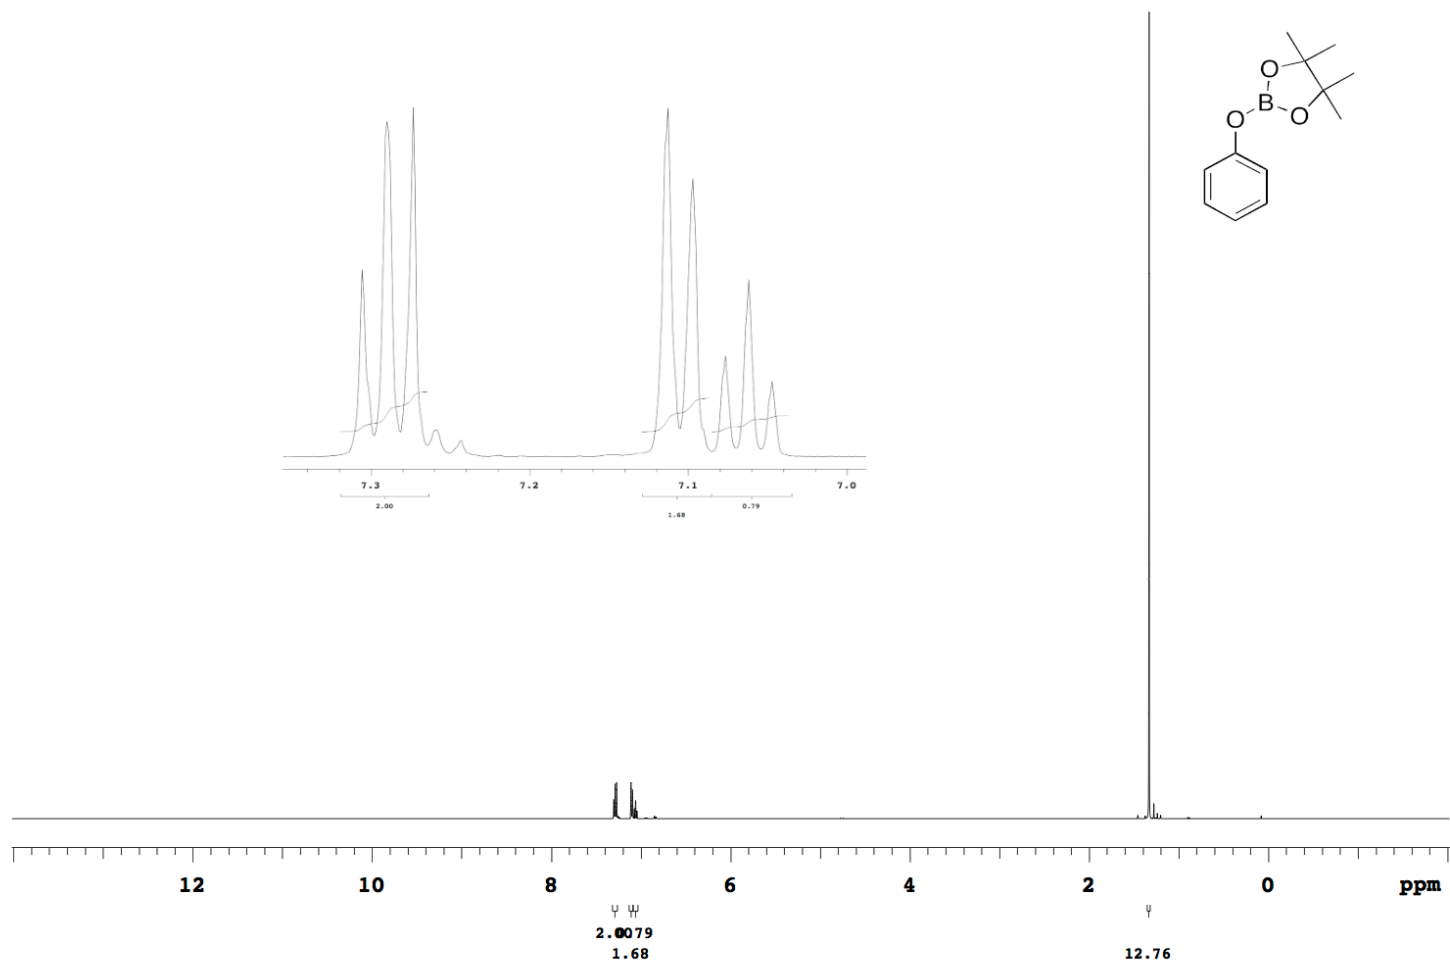

$^1\text{H-NMR}$  (500 MHz,  $\text{CDCl}_3$ )

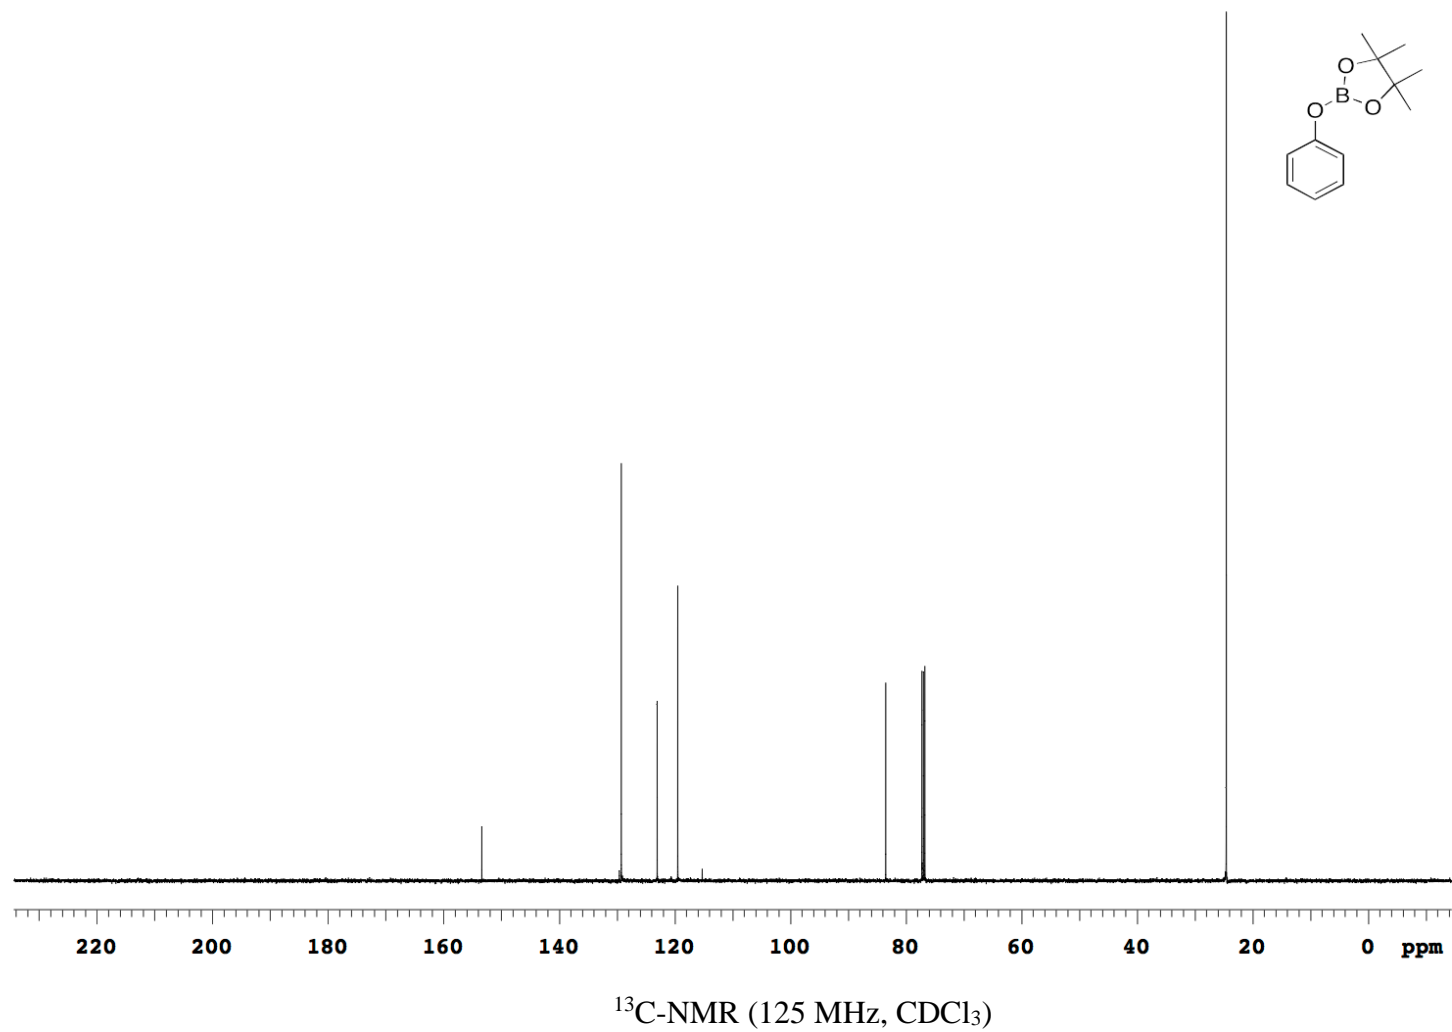

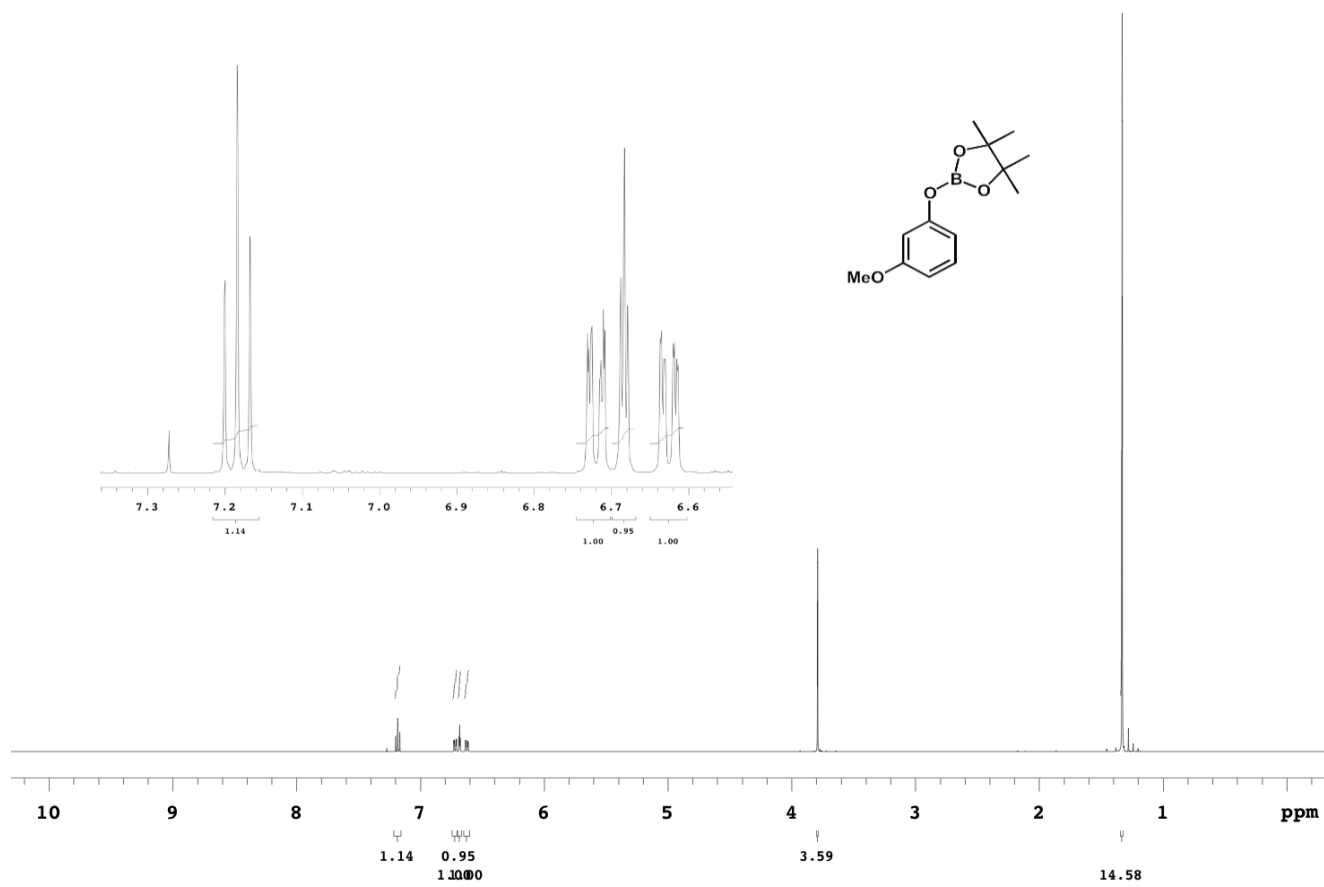

$^1\text{H-NMR}$  (500 MHz,  $\text{CDCl}_3$ )



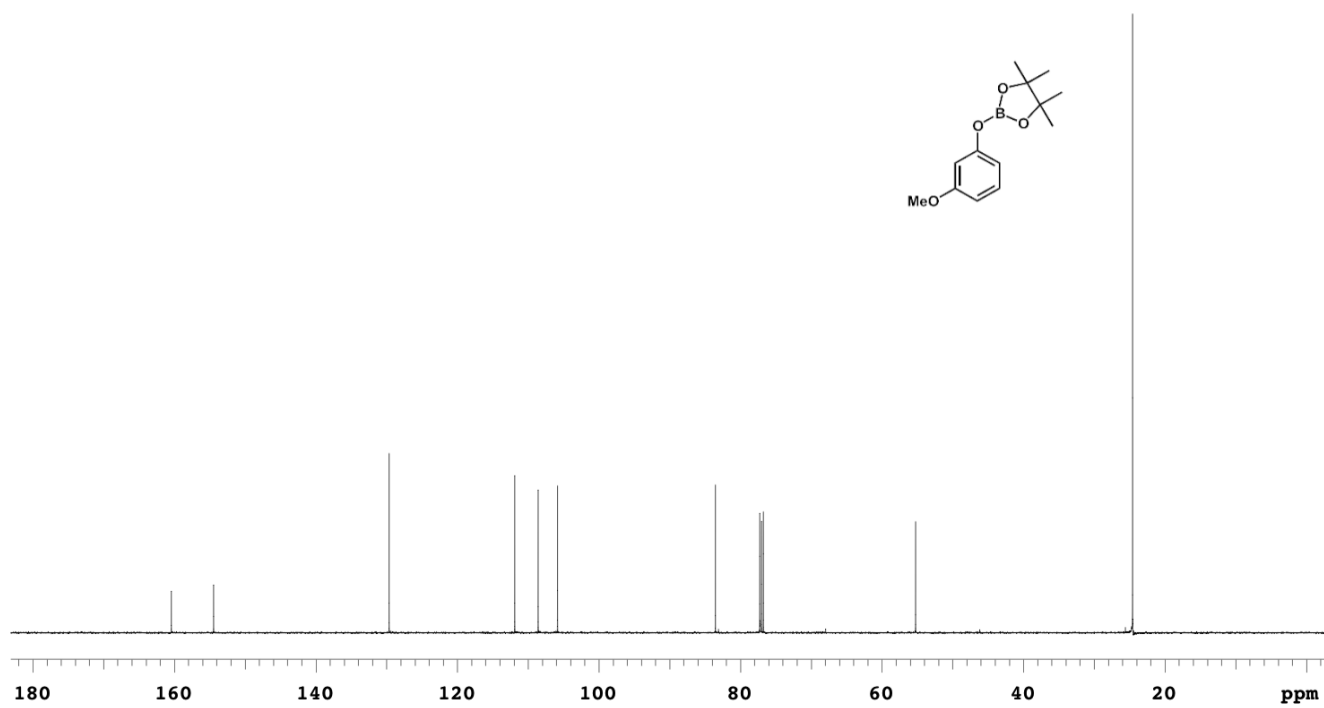

$^{13}\text{C}$ -NMR (125 MHz,  $\text{CDCl}_3$ )



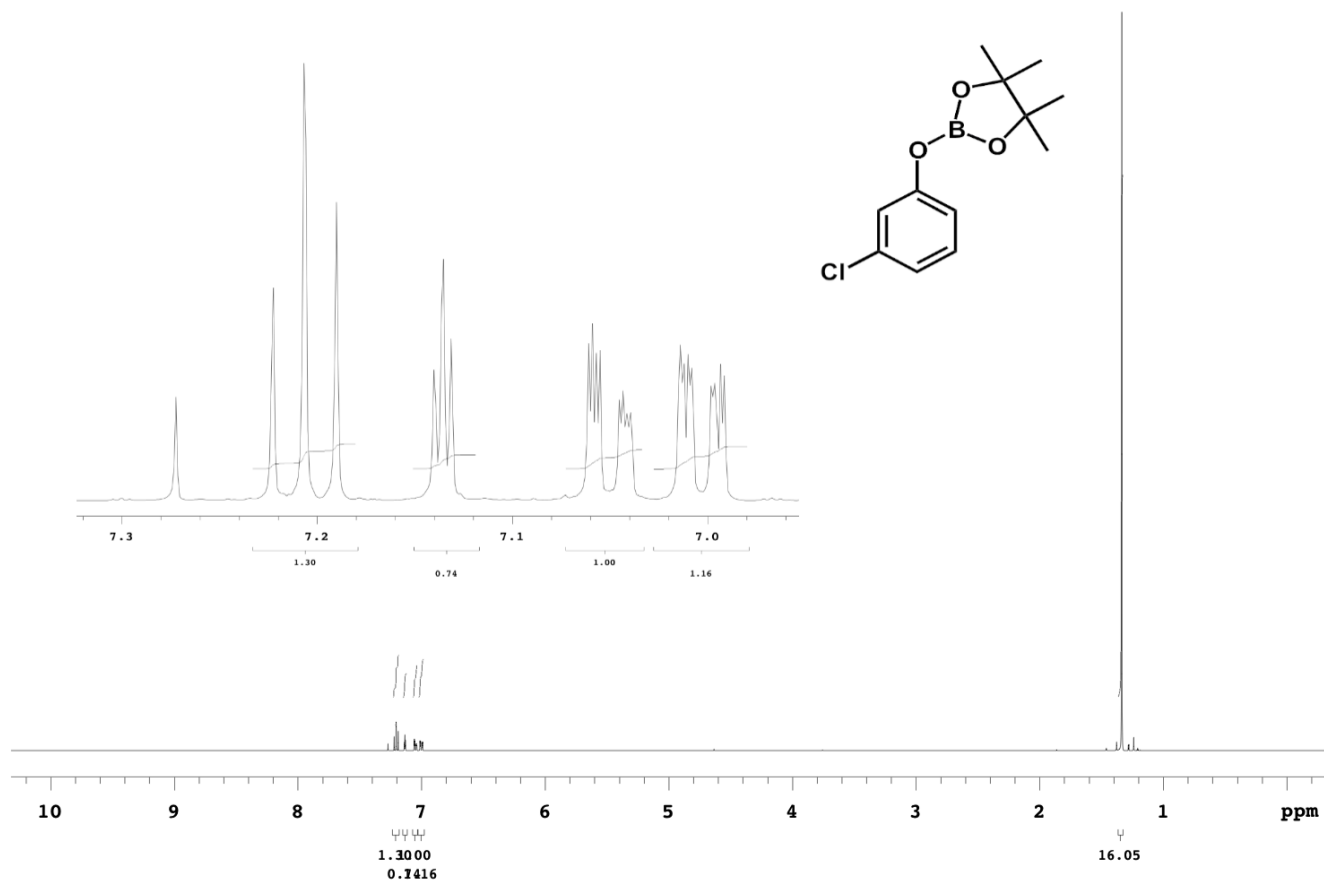

$^1\text{H-NMR}$  (500 MHz,  $\text{CDCl}_3$ )

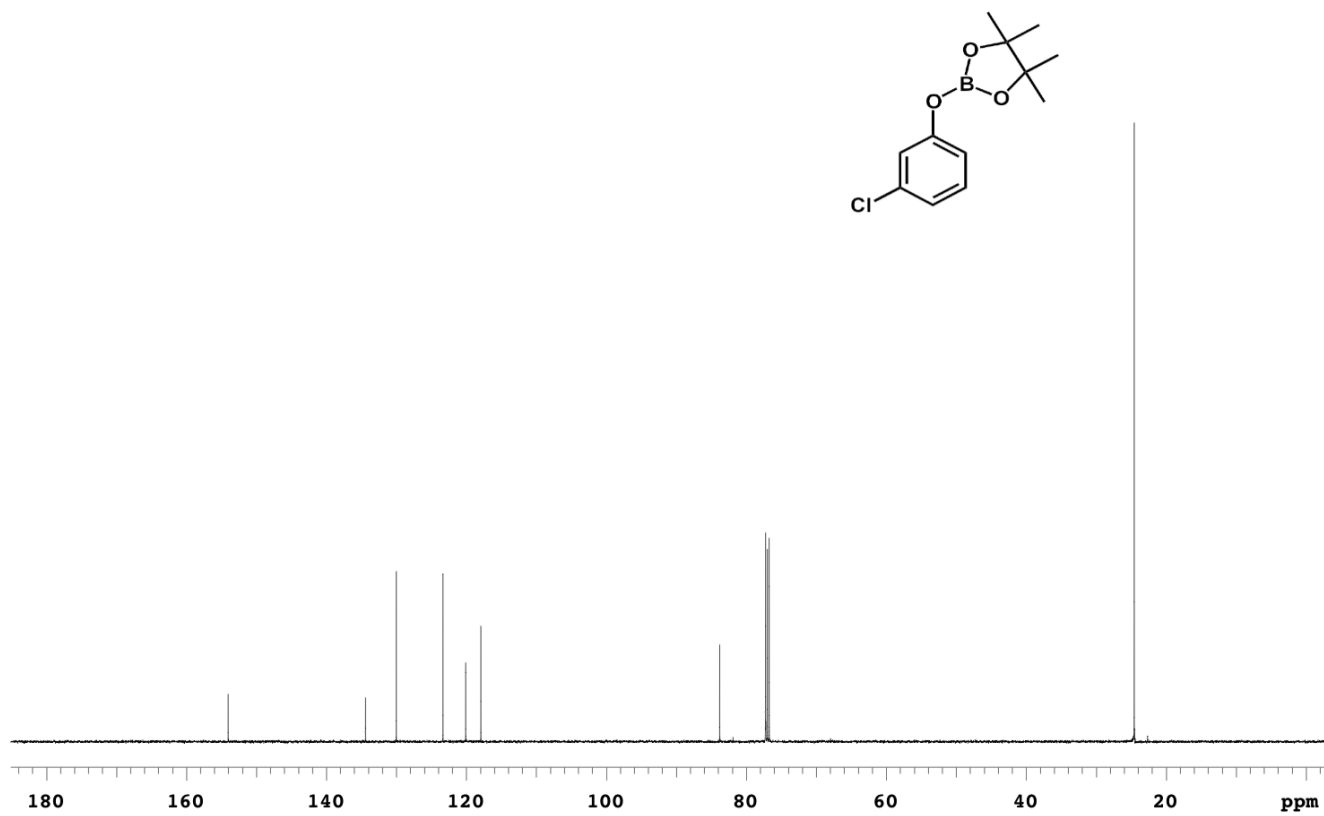

$^{13}\text{C}$  NMR (125 MHz,  $\text{CDCl}_3$ )



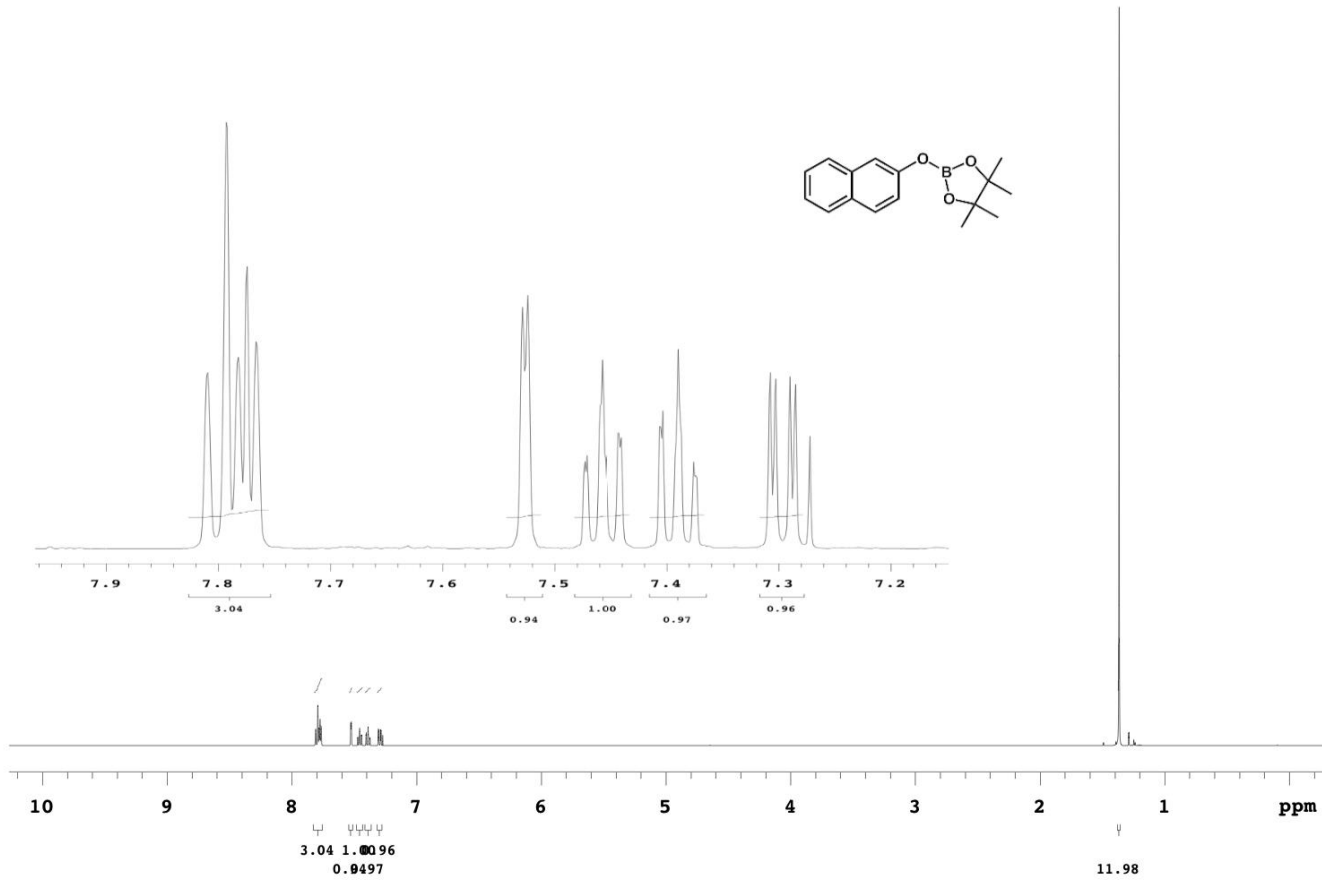

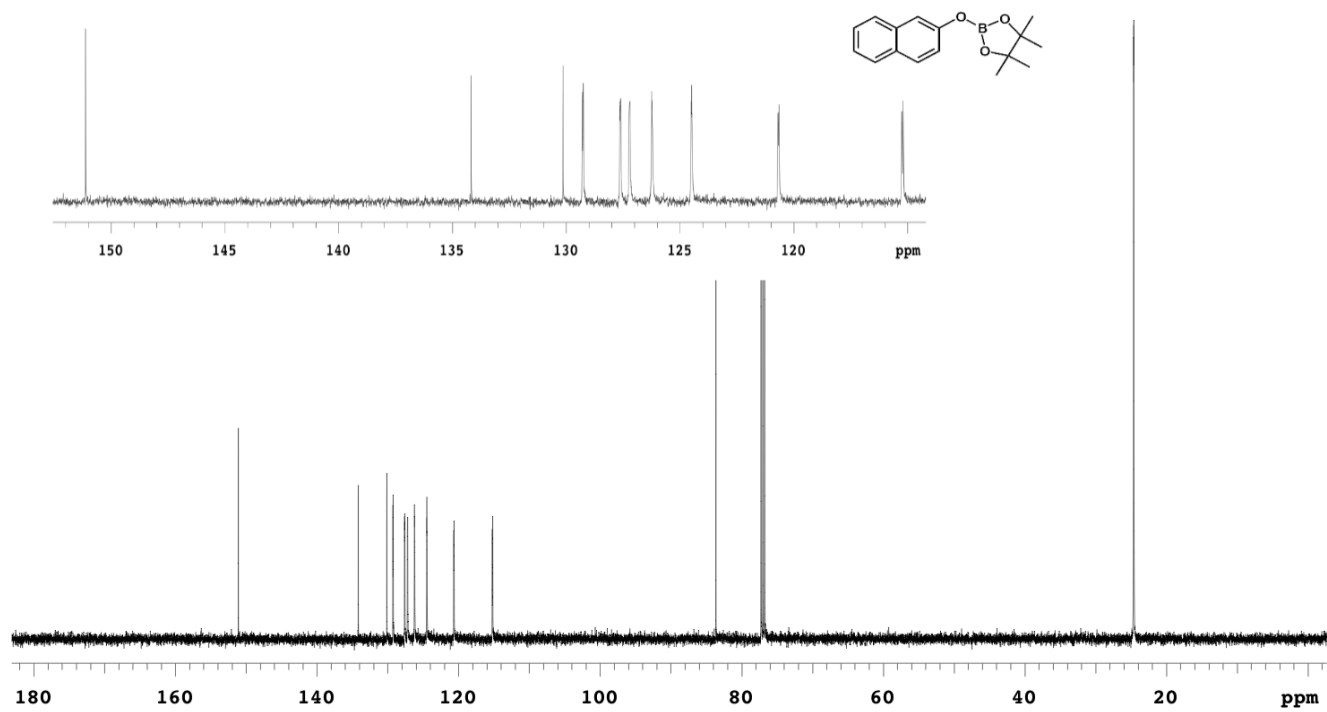

$^{13}\text{C}$ -NMR (125 MHz,  $\text{CDCl}_3$ )

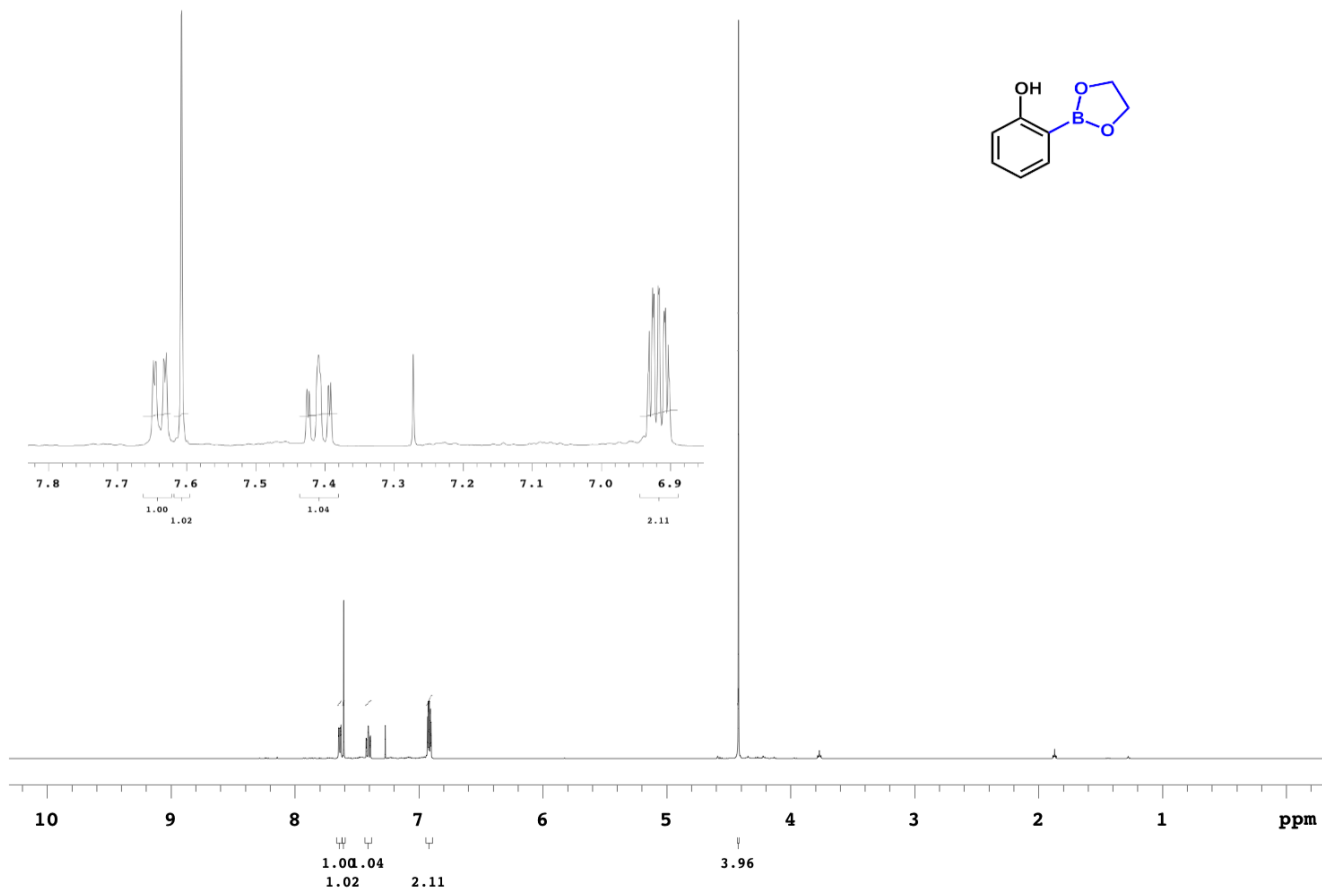 $^1\text{H-NMR}$  (500 MHz,  $\text{CDCl}_3$ )

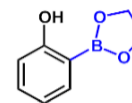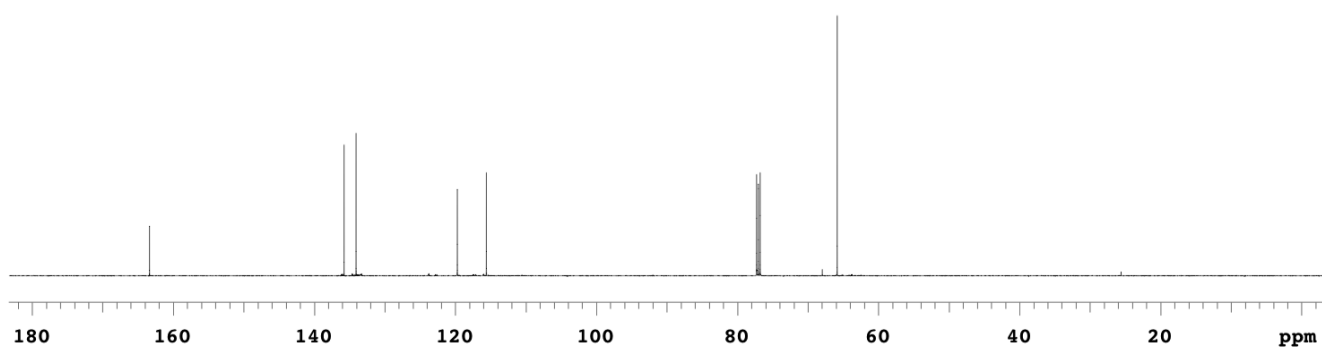

<sup>13</sup>C NMR (125 MHz, CDCl<sub>3</sub>)



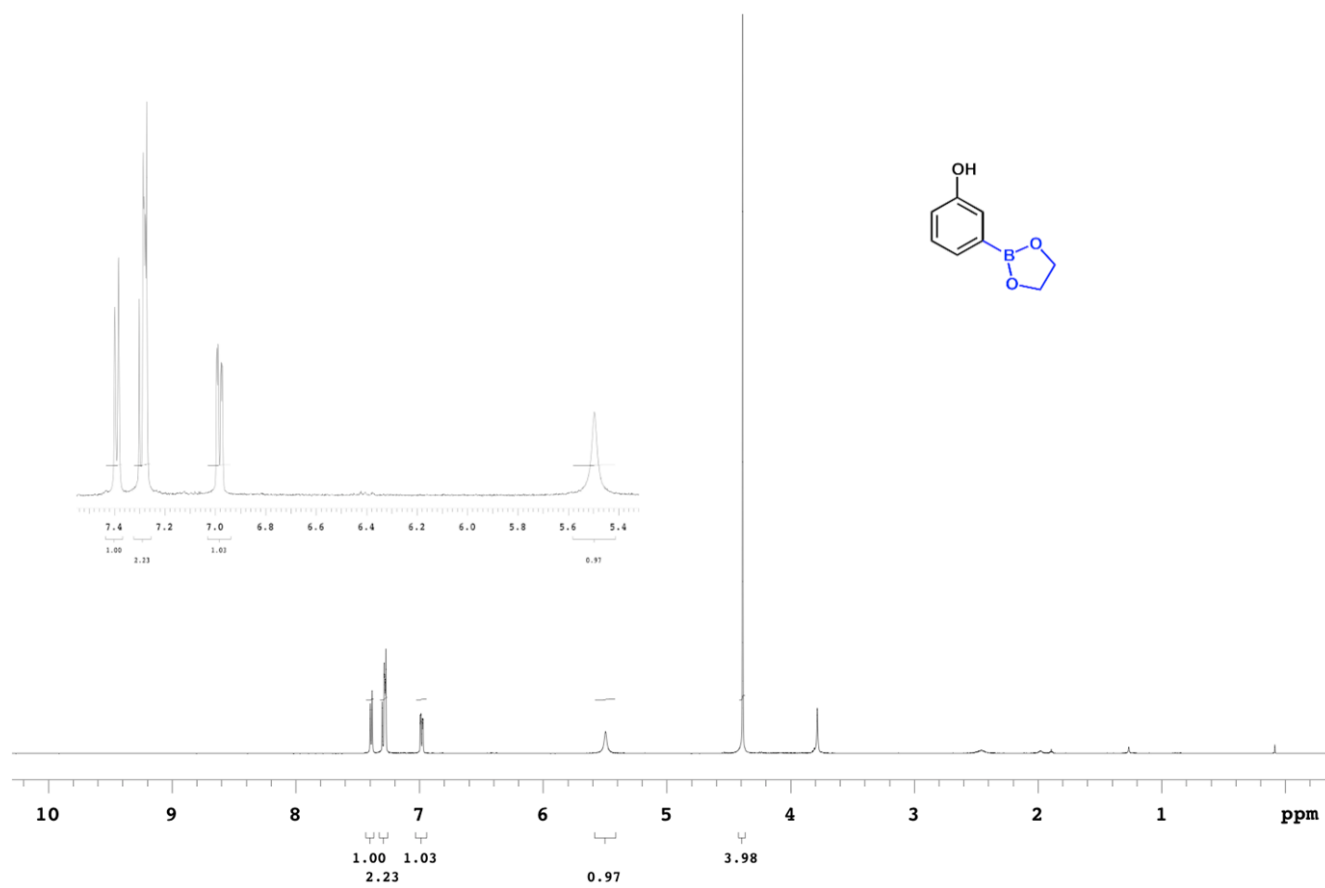

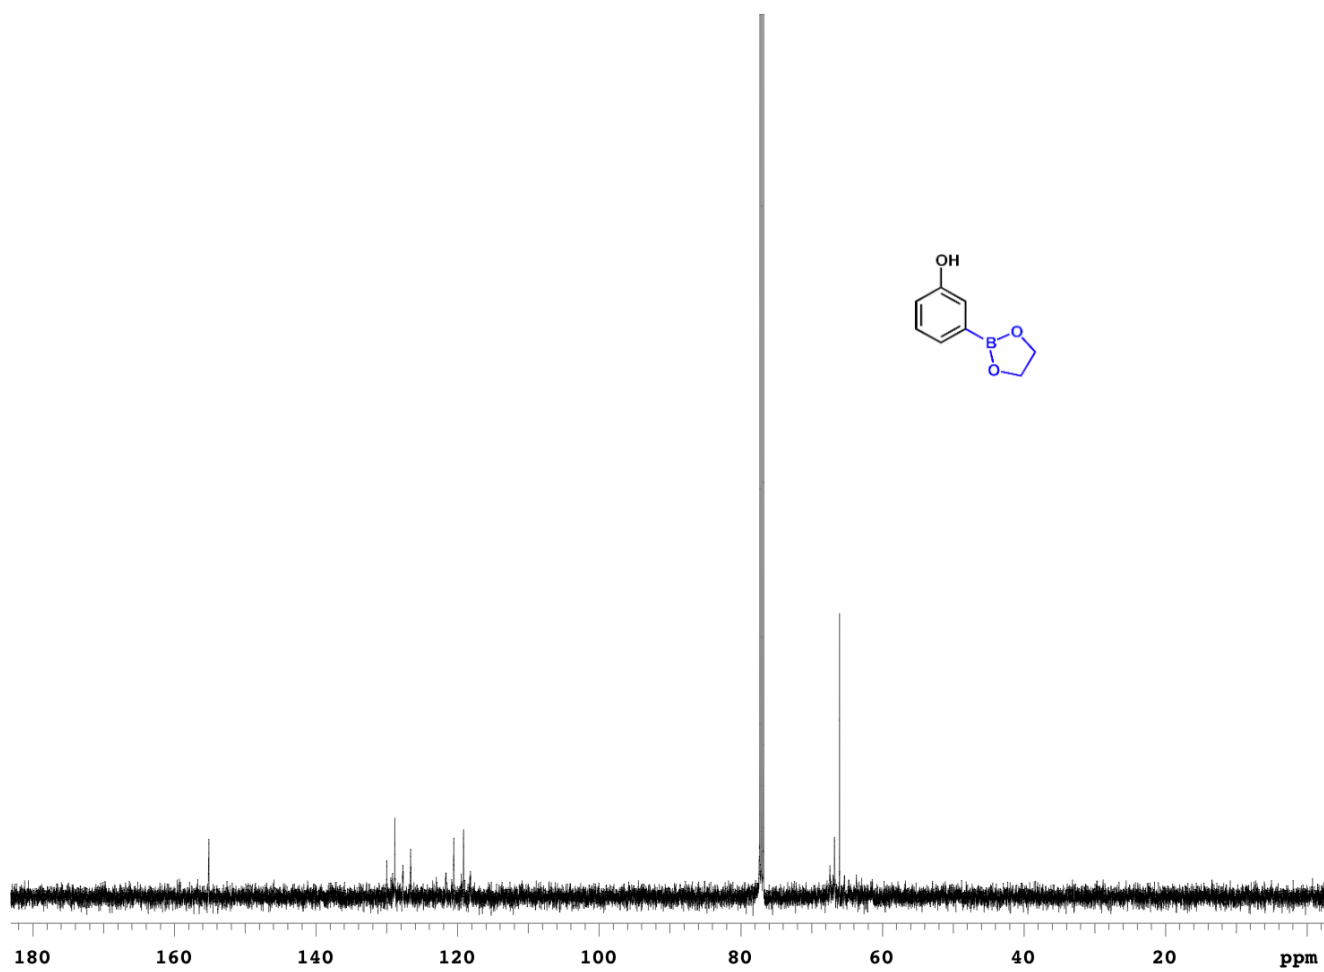

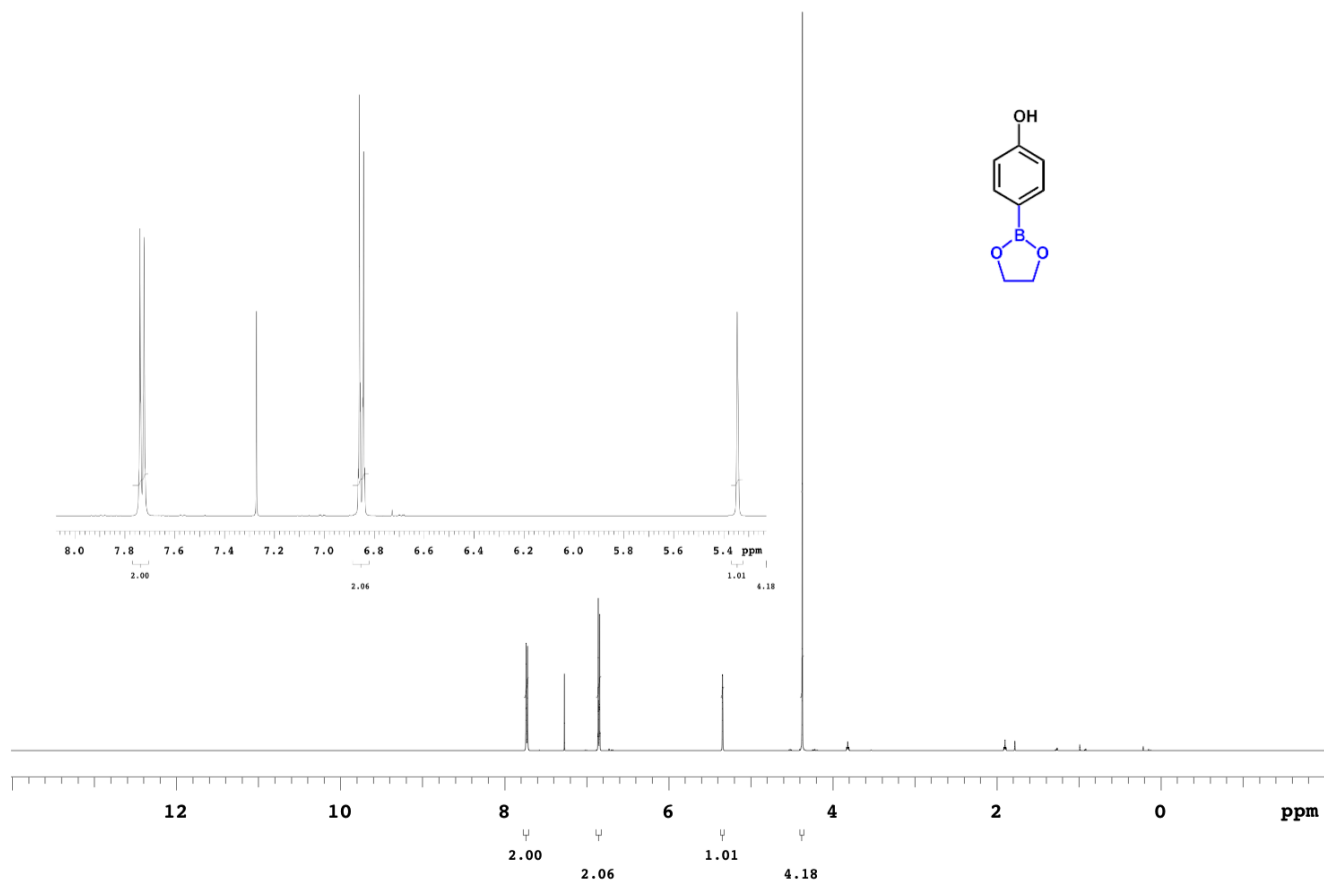

$^1\text{H-NMR}$  (500 MHz,  $\text{CDCl}_3$ )

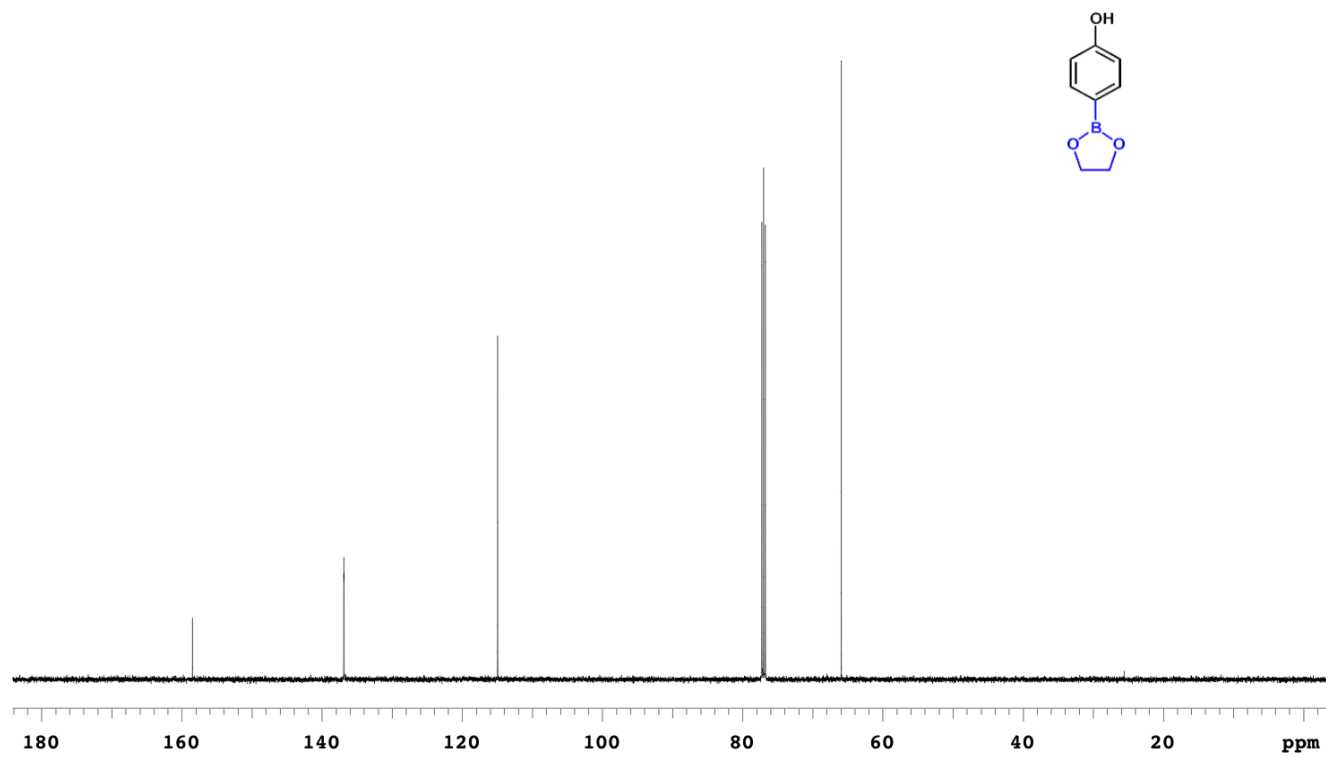

$^{13}\text{C}$ -NMR (125 MHz,  $\text{CDCl}_3$ )

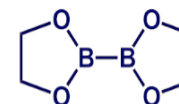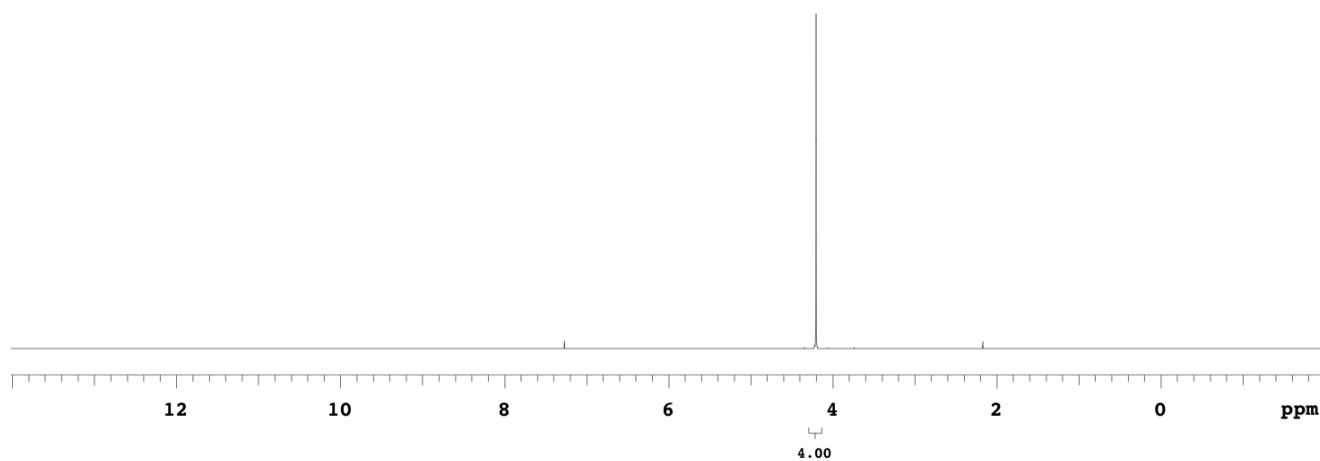

$^1\text{H-NMR}$  (500 MHz,  $\text{CDCl}_3$ )

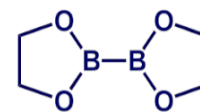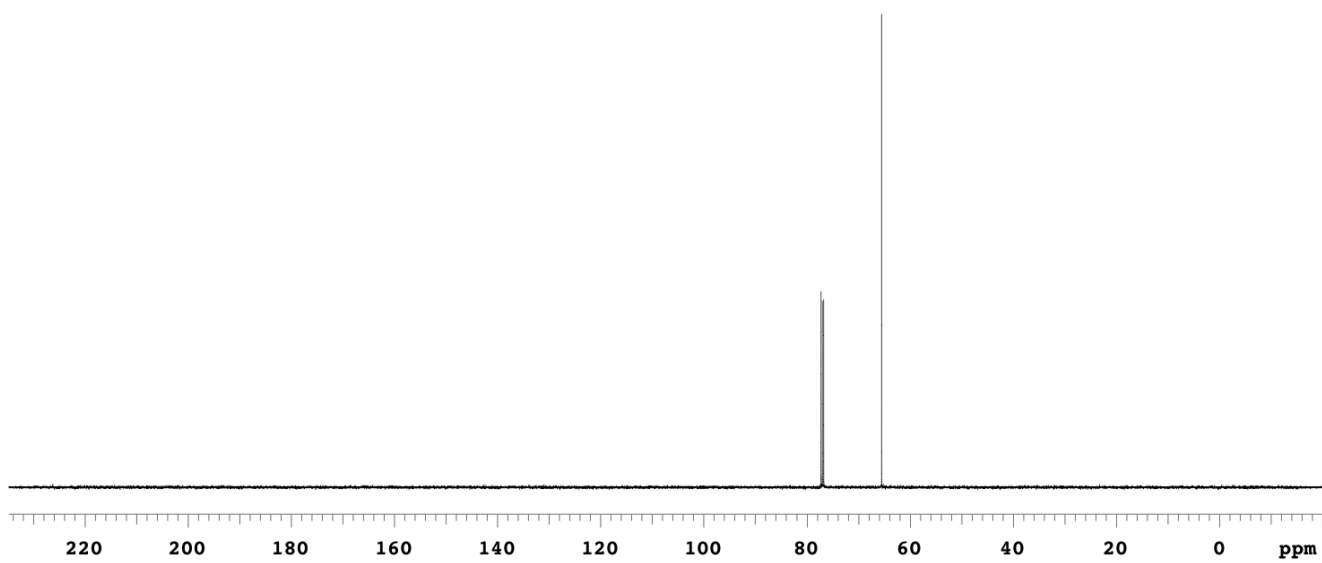

$^{13}\text{C}$  NMR (125 MHz,  $\text{CDCl}_3$ )

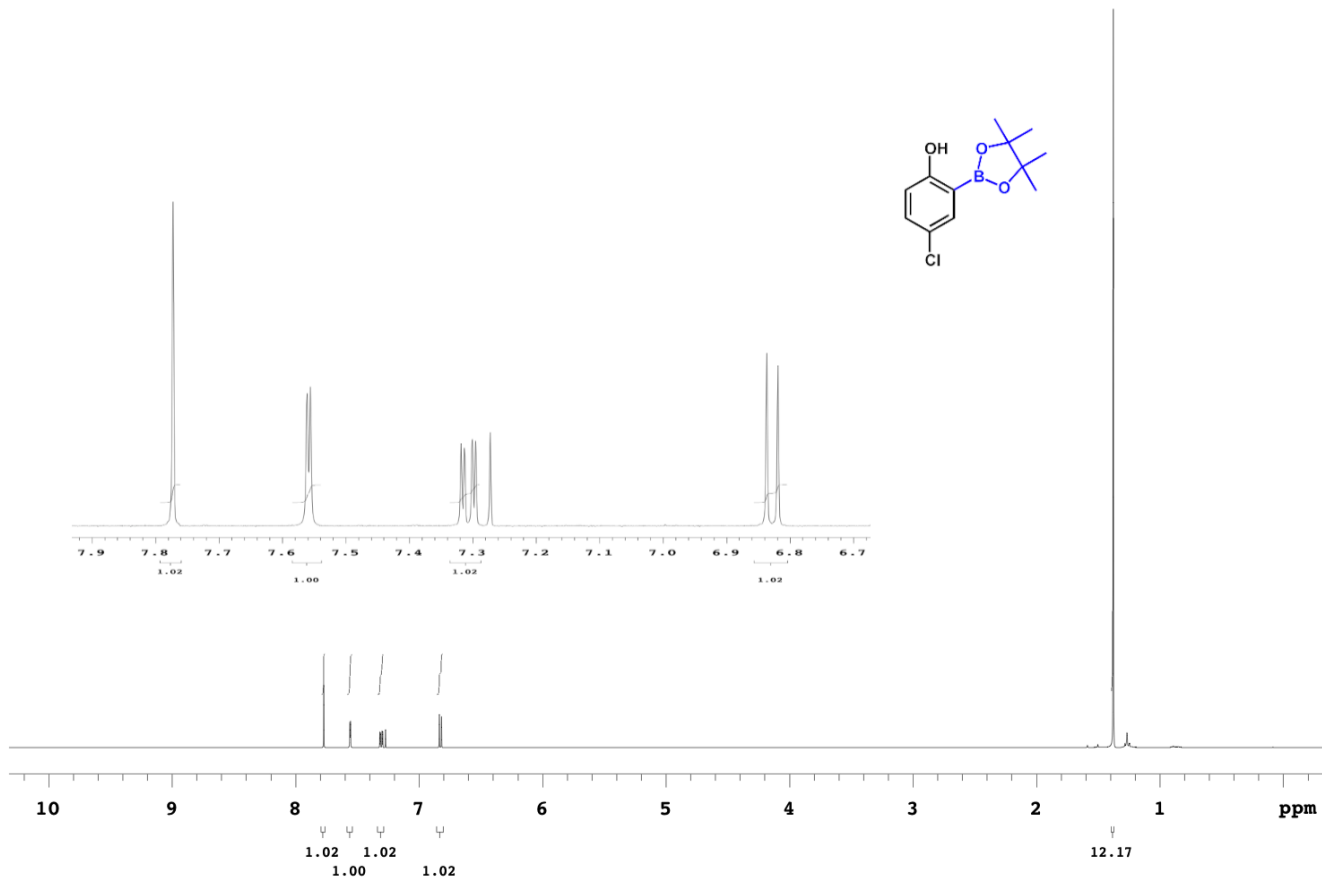

$^1\text{H-NMR}$  (500 MHz,  $\text{CDCl}_3$ )



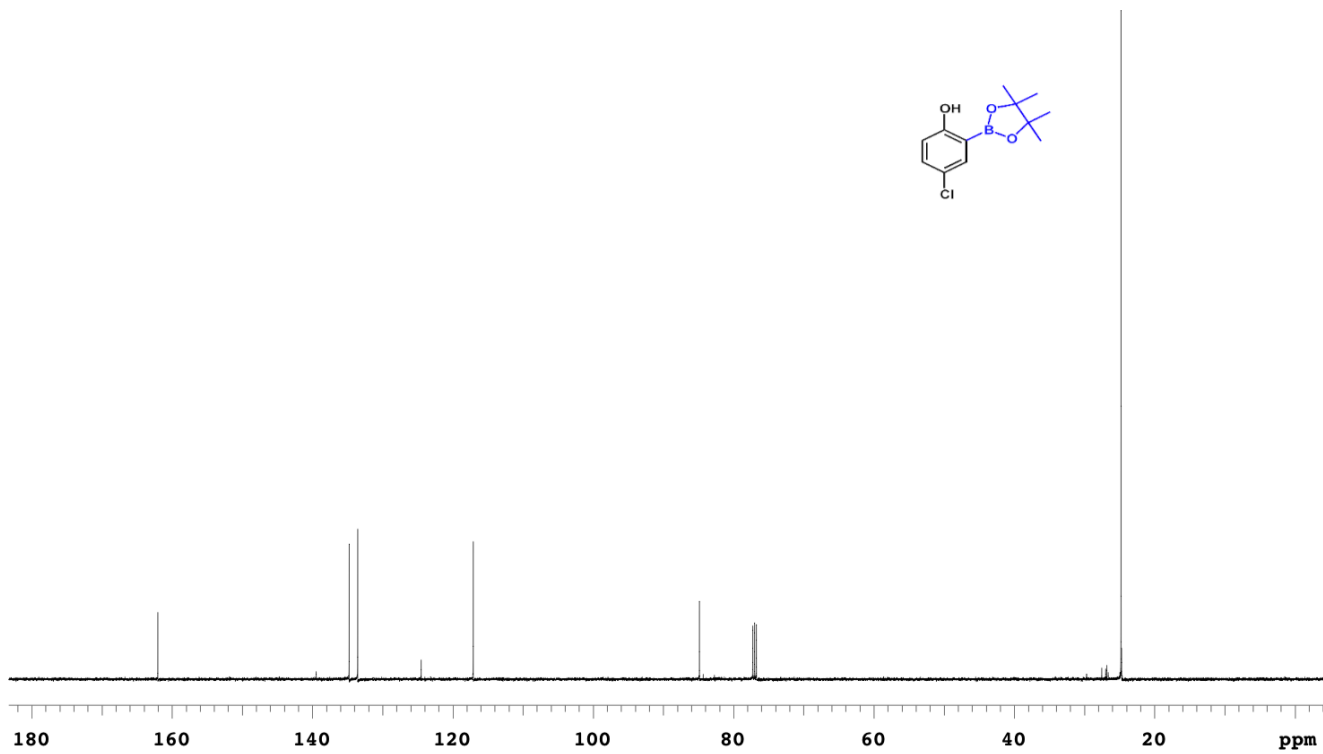

$^{13}\text{C}$ -NMR (125 MHz,  $\text{CDCl}_3$ )

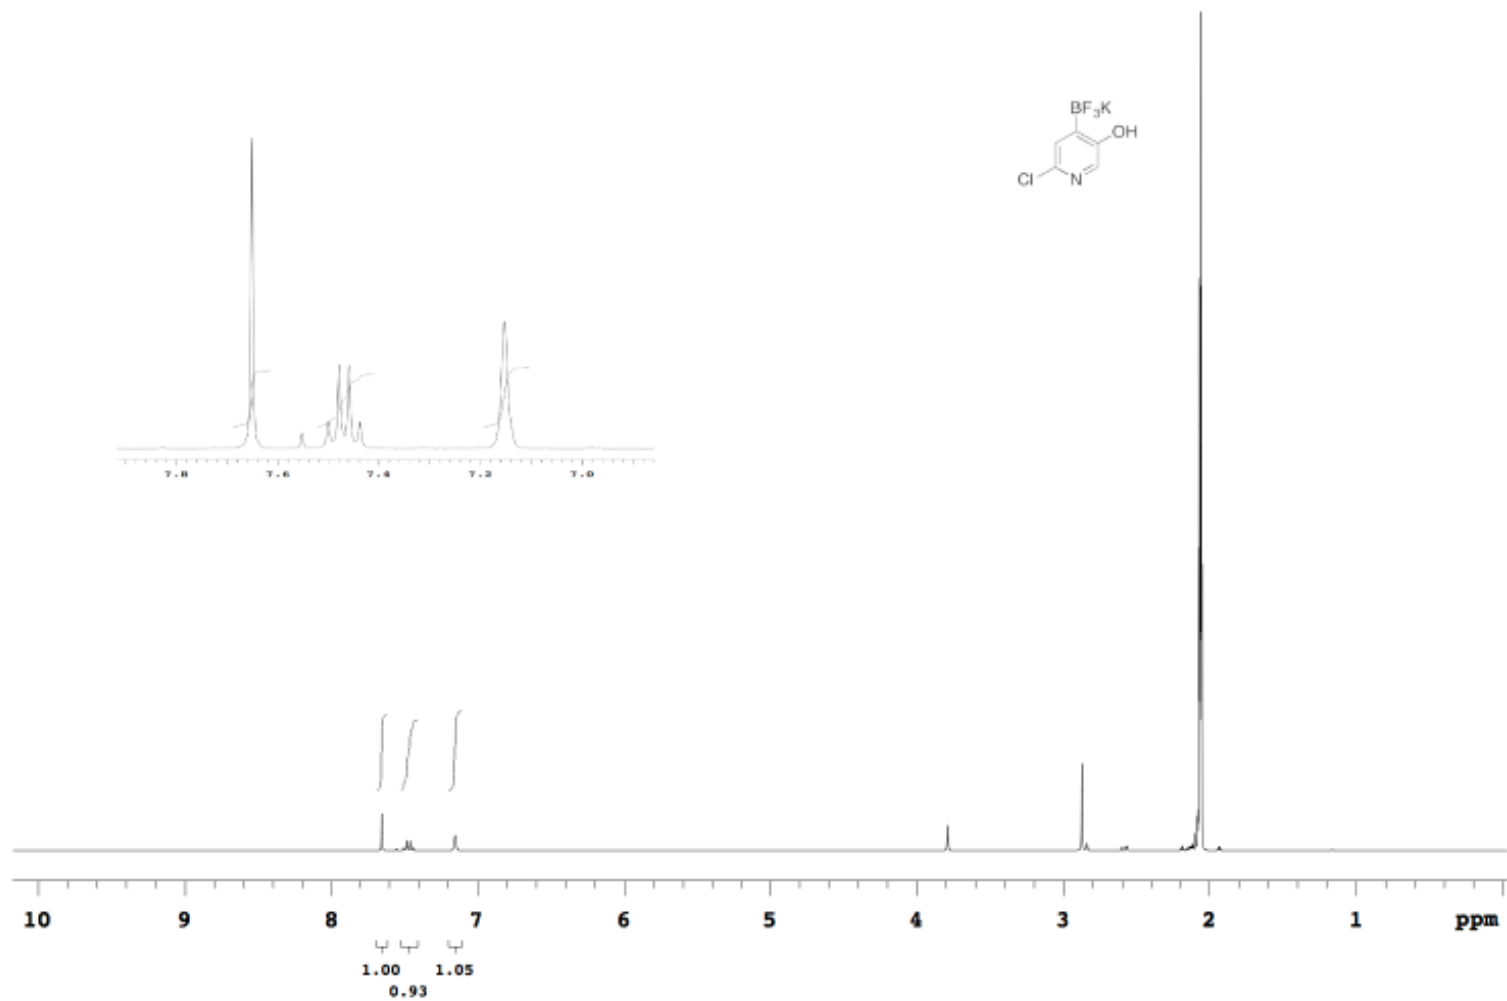

$^1\text{H-NMR}$  (500 MHz,  $(\text{CD}_3)_2\text{CO}$ )

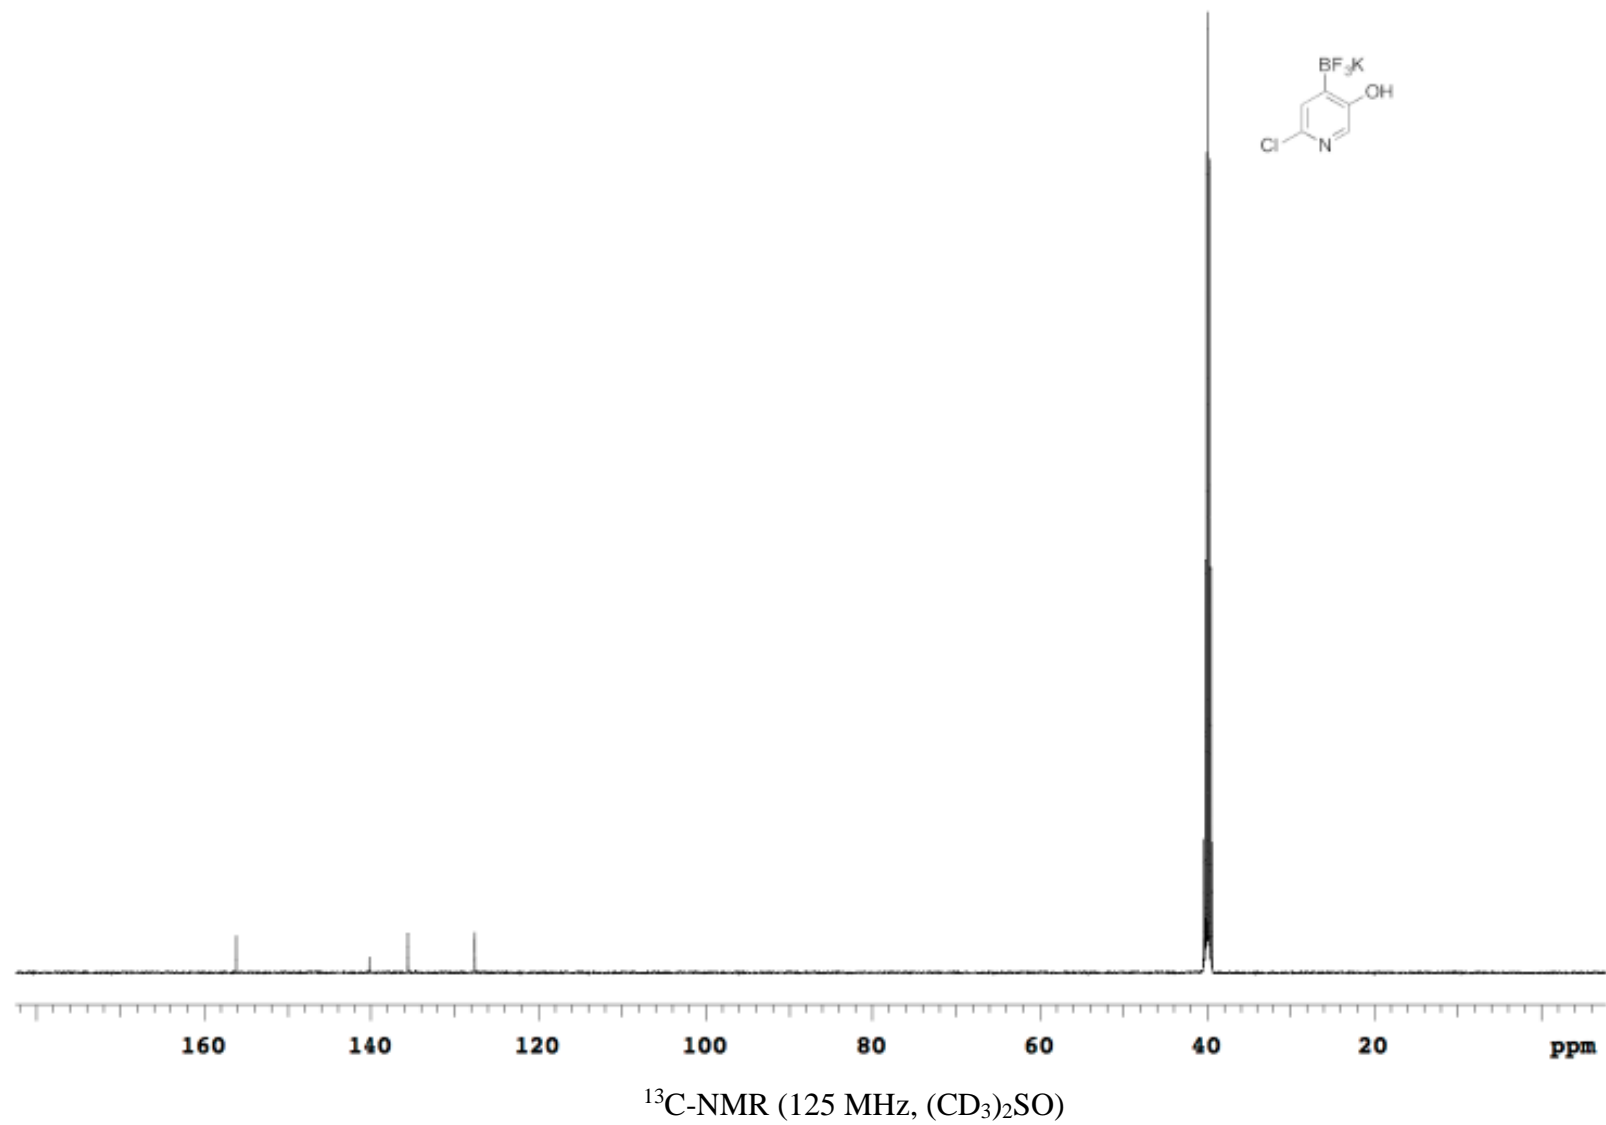

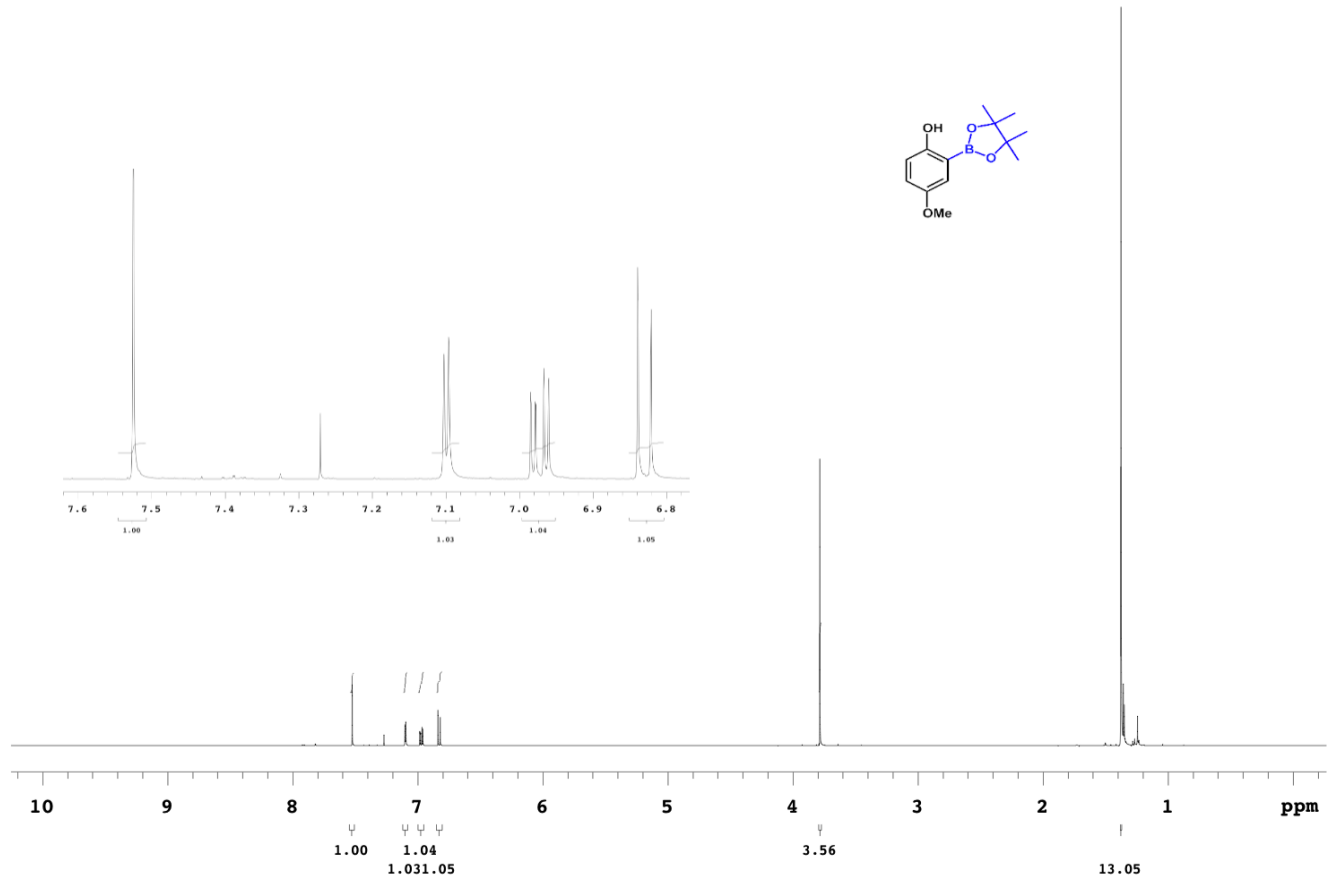

$^1\text{H-NMR}$  (500 MHz,  $\text{CDCl}_3$ )

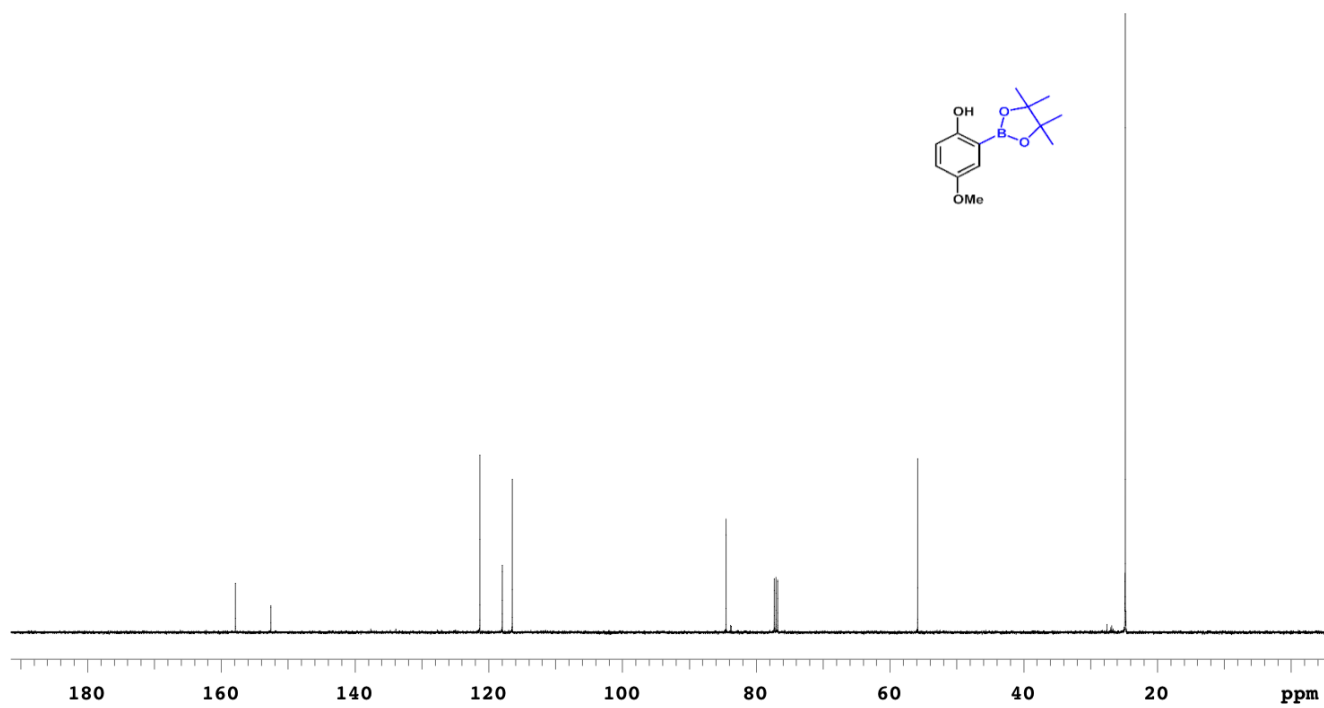

$^{13}\text{C}$ -NMR (125 MHz,  $\text{CDCl}_3$ )

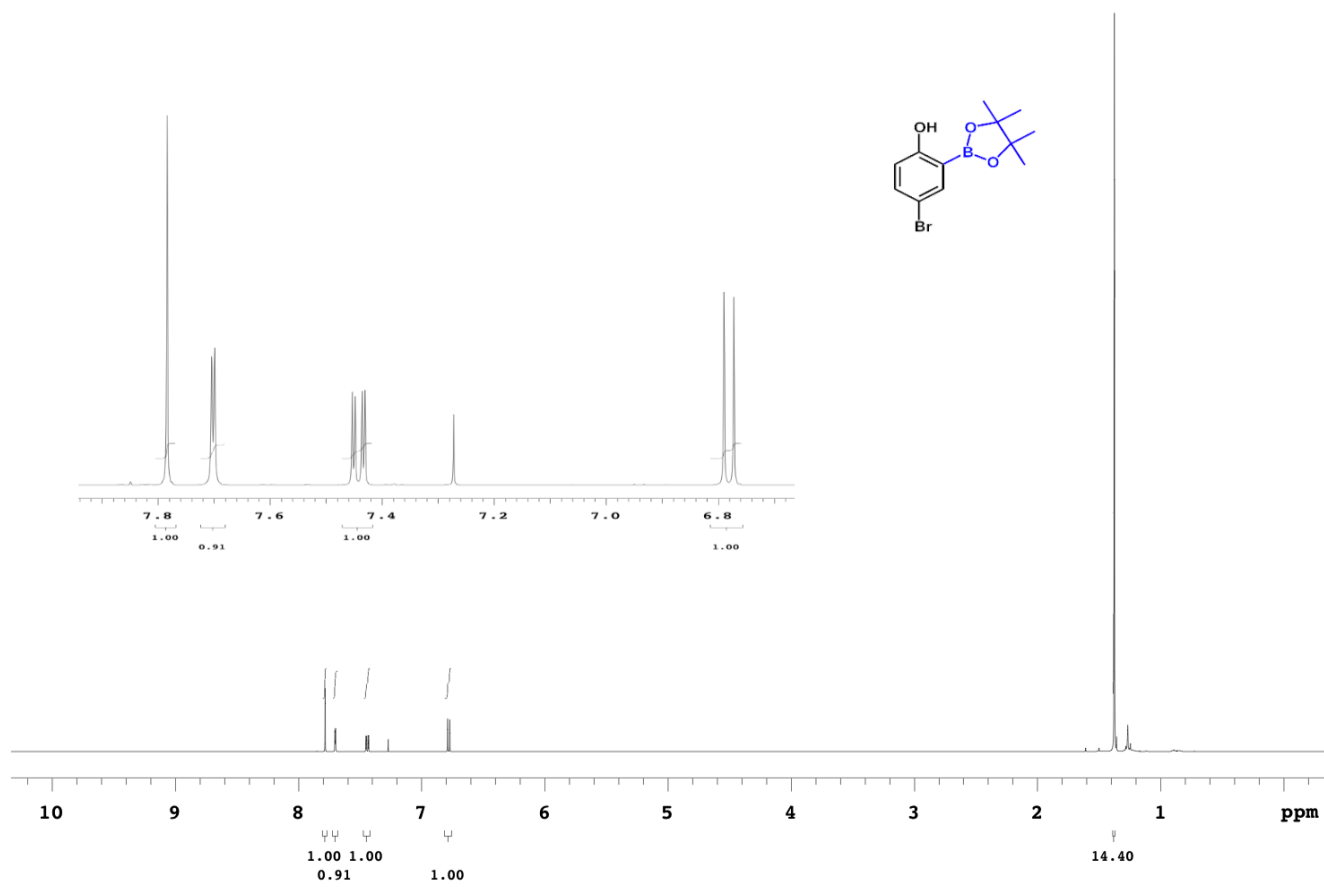

$^1\text{H-NMR}$  (500 MHz,  $\text{CDCl}_3$ )

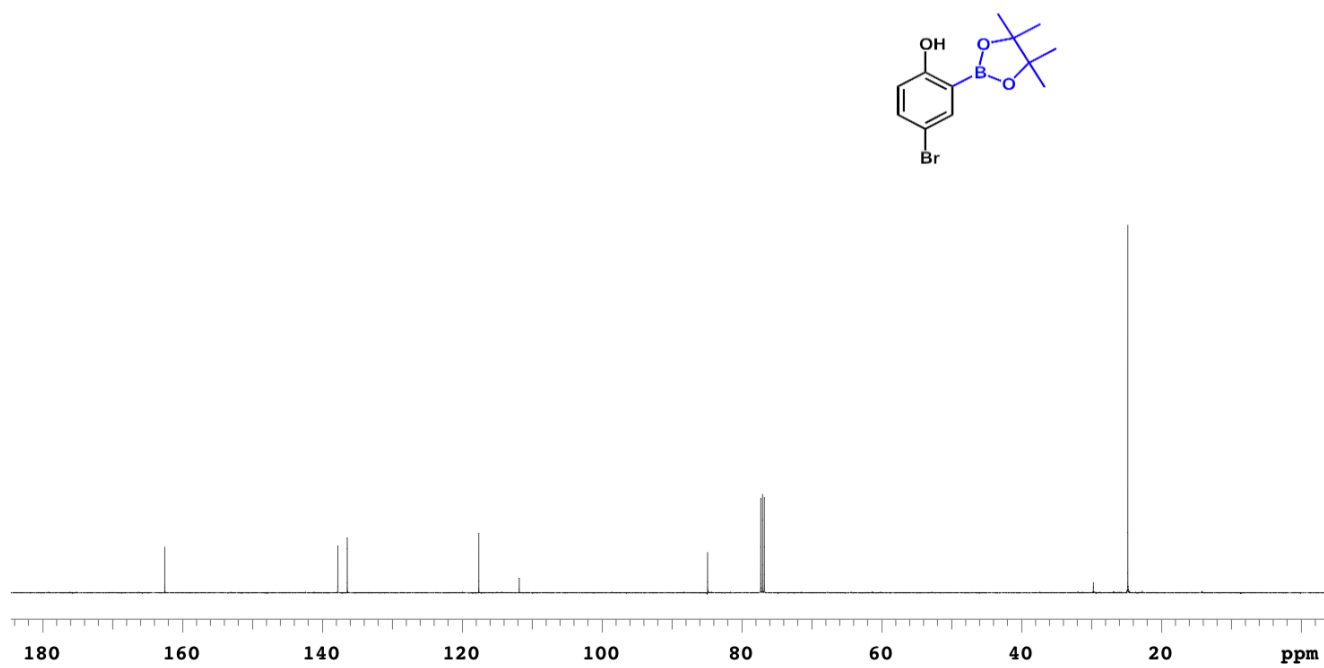

$^{13}\text{C}$ -NMR (125 MHz,  $\text{CDCl}_3$ )





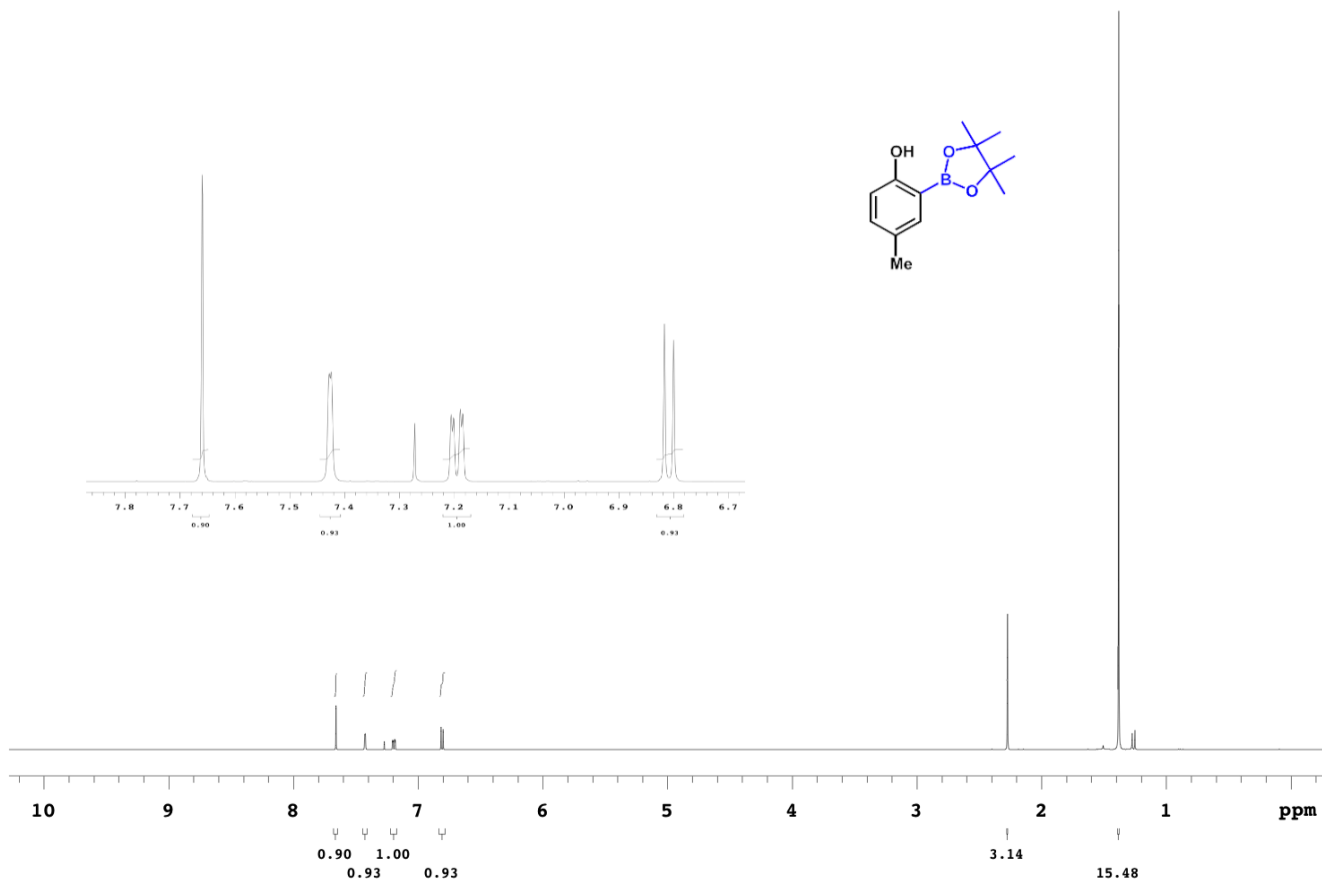

$^1\text{H-NMR}$  (500 MHz,  $\text{CDCl}_3$ )

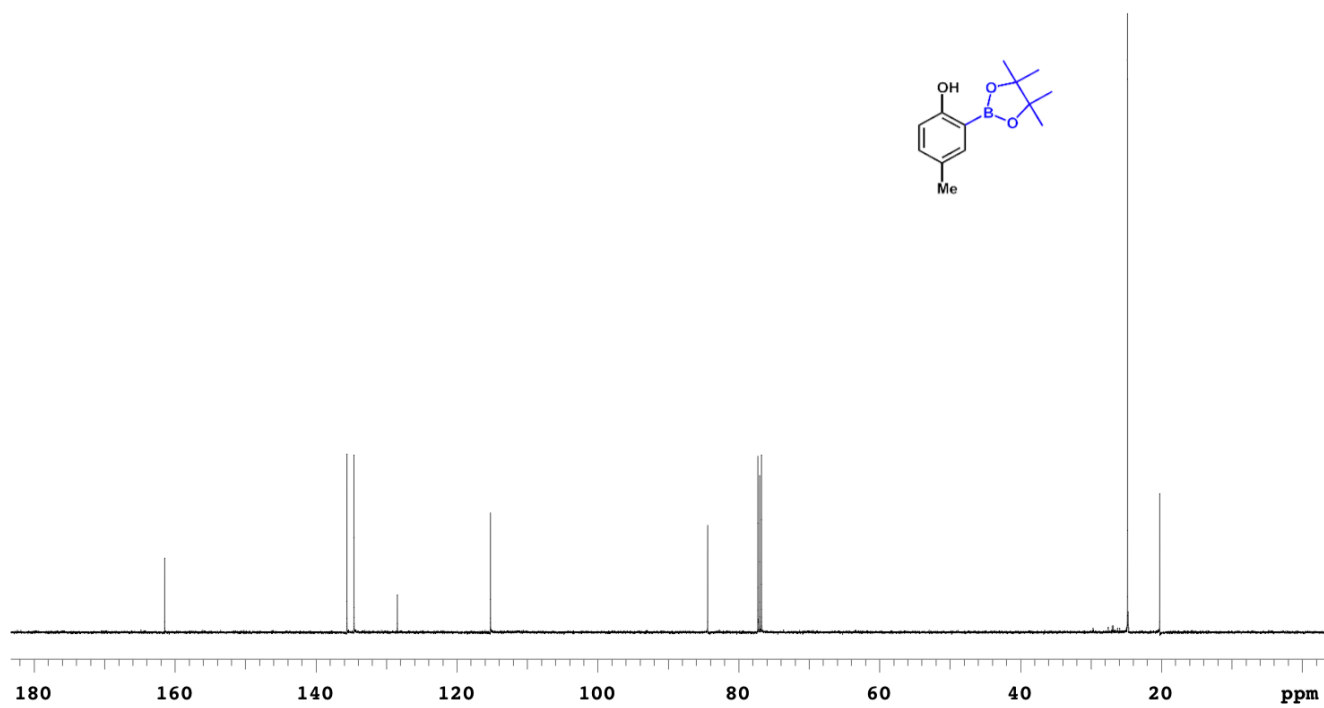

$^{13}\text{C}$ -NMR (125 MHz,  $\text{CDCl}_3$ )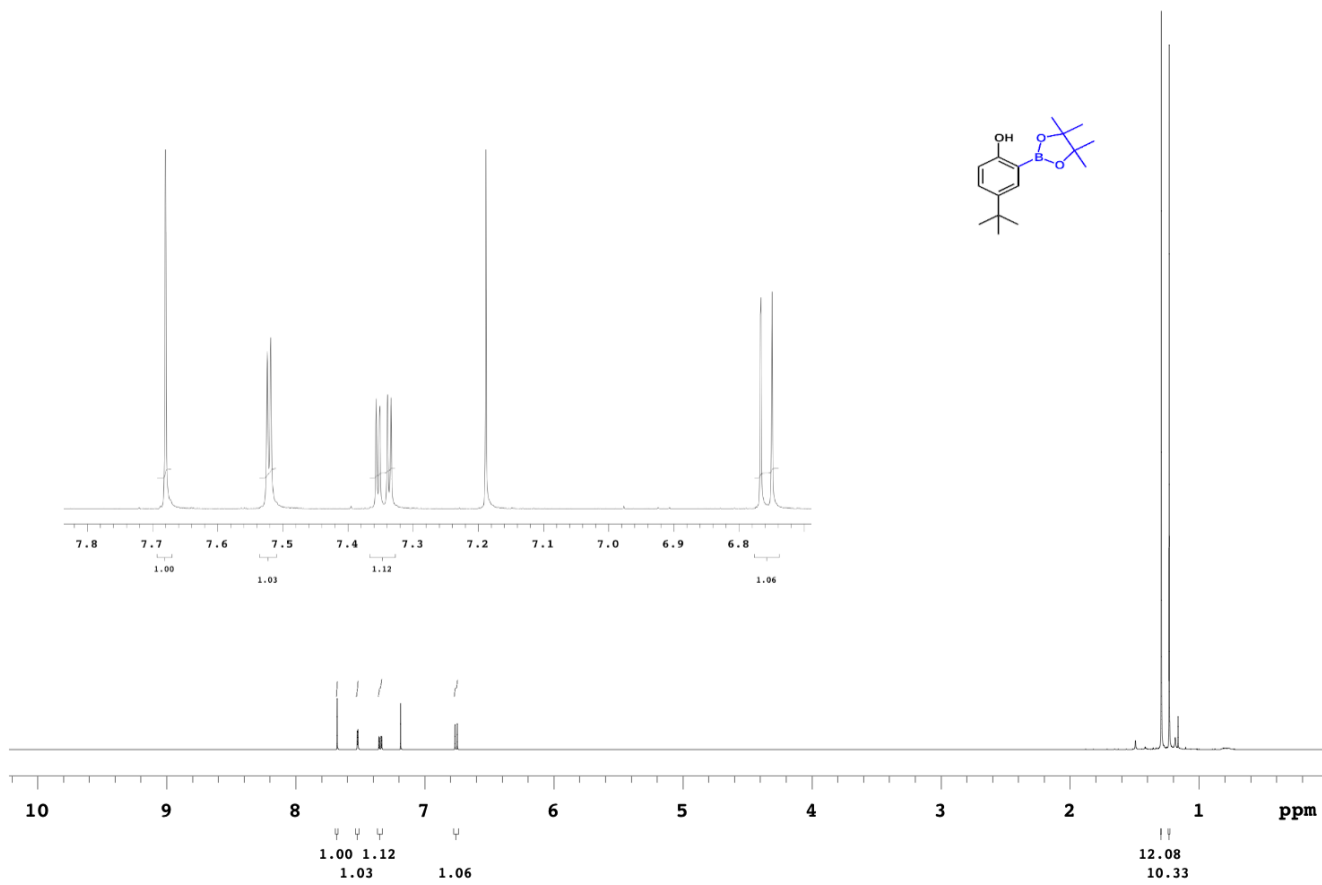

$^1\text{H-NMR}$  (500 MHz,  $\text{CDCl}_3$ )

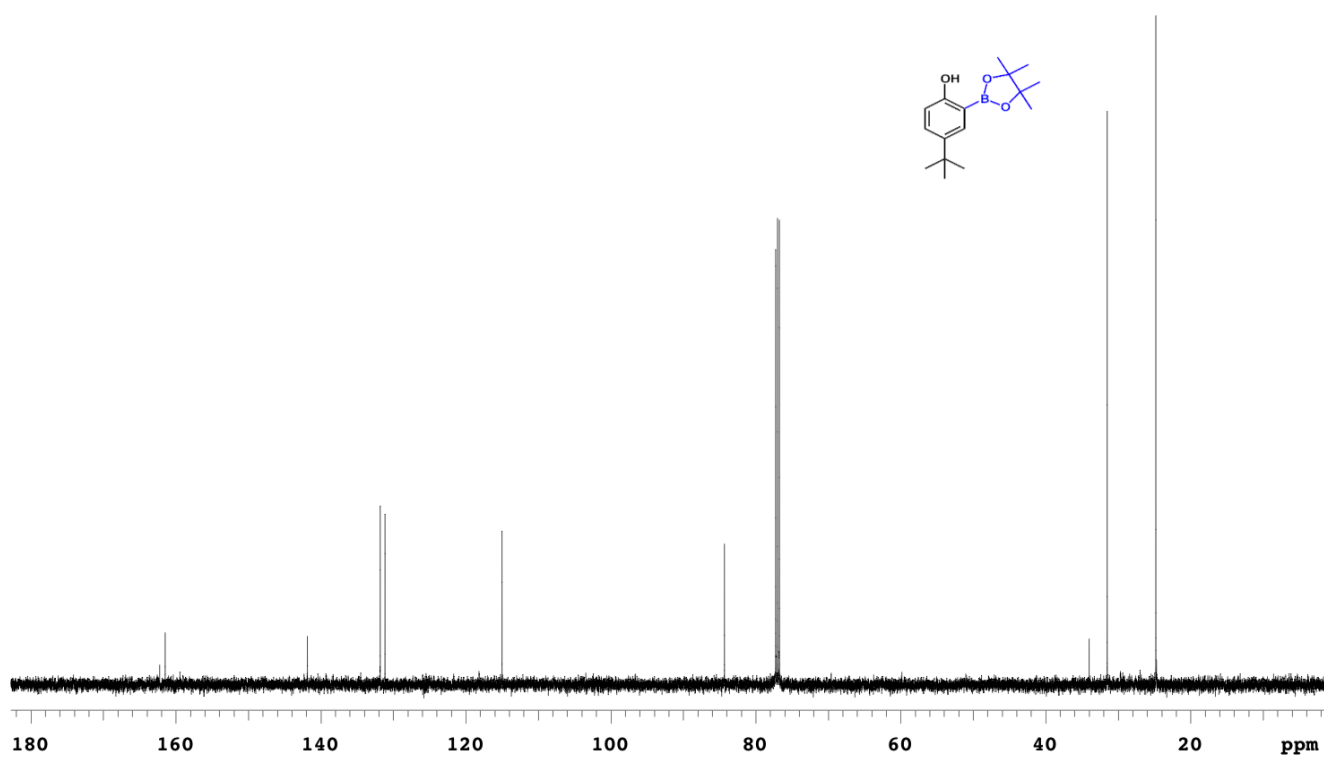

$^{13}\text{C}$ -NMR (125 MHz,  $\text{CDCl}_3$ )

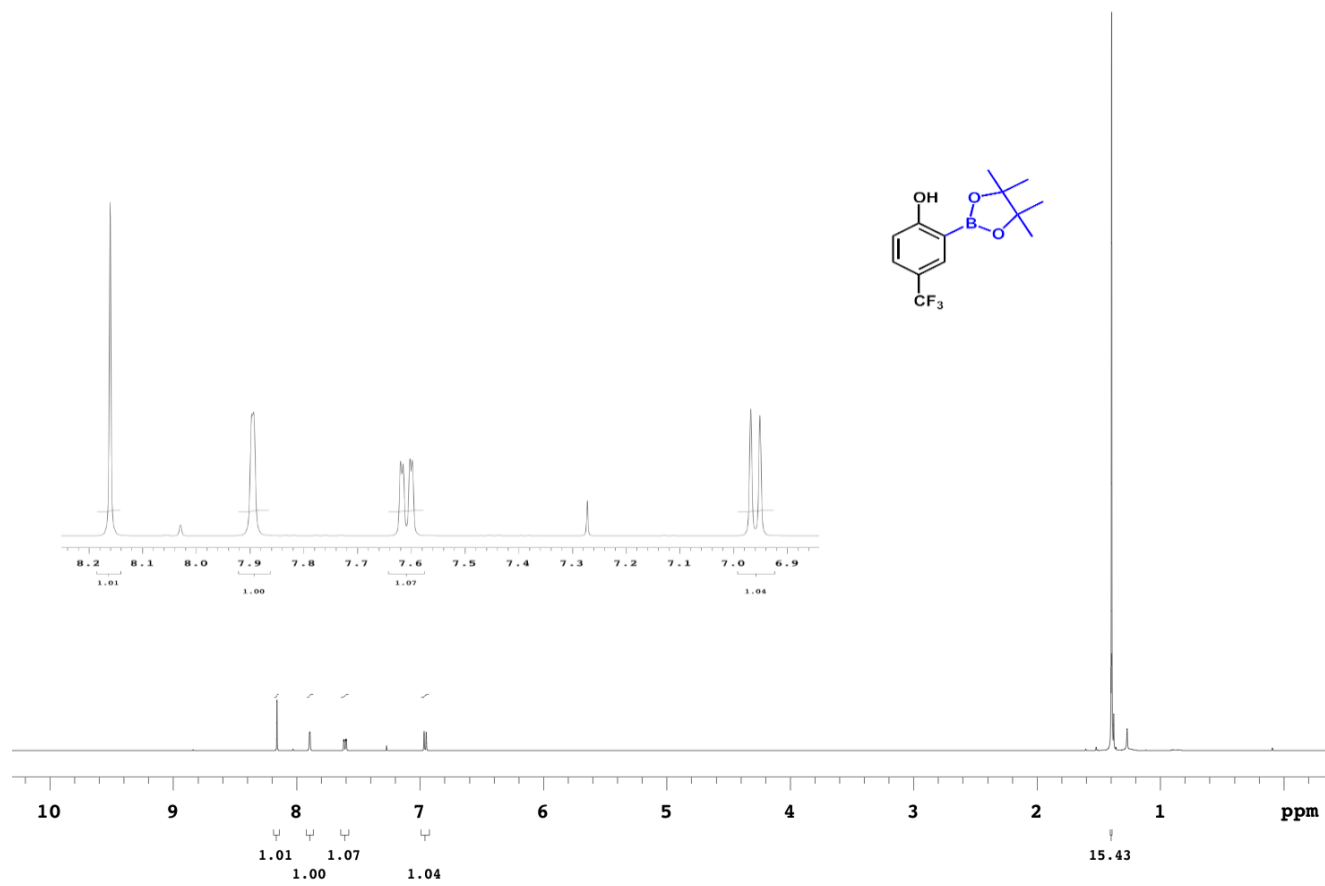

$^1\text{H-NMR}$  (500 MHz,  $\text{CDCl}_3$ )

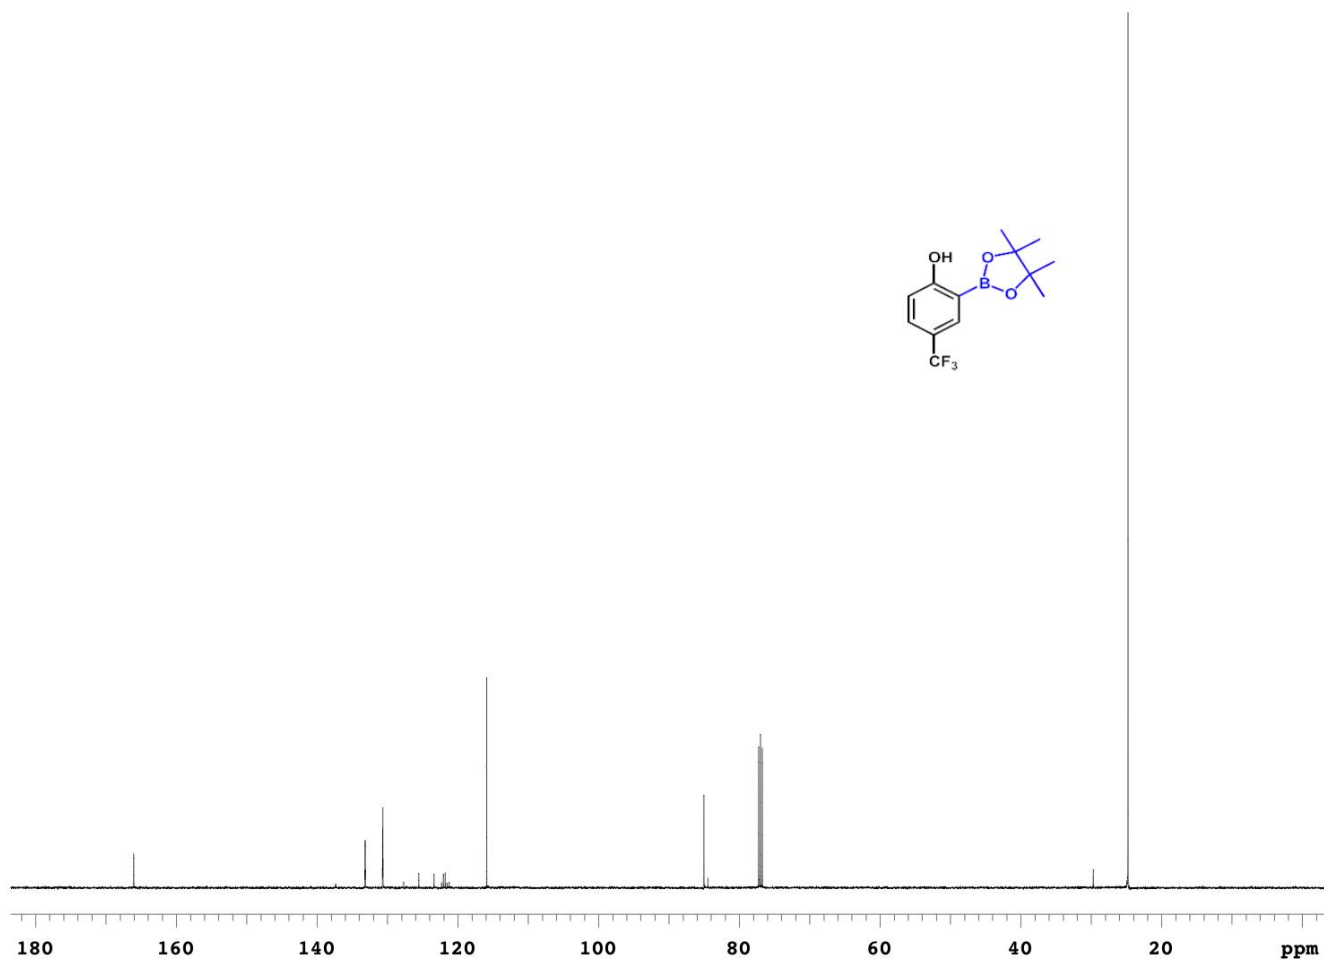

$^{13}\text{C}$ -NMR (125 MHz,  $\text{CDCl}_3$ )



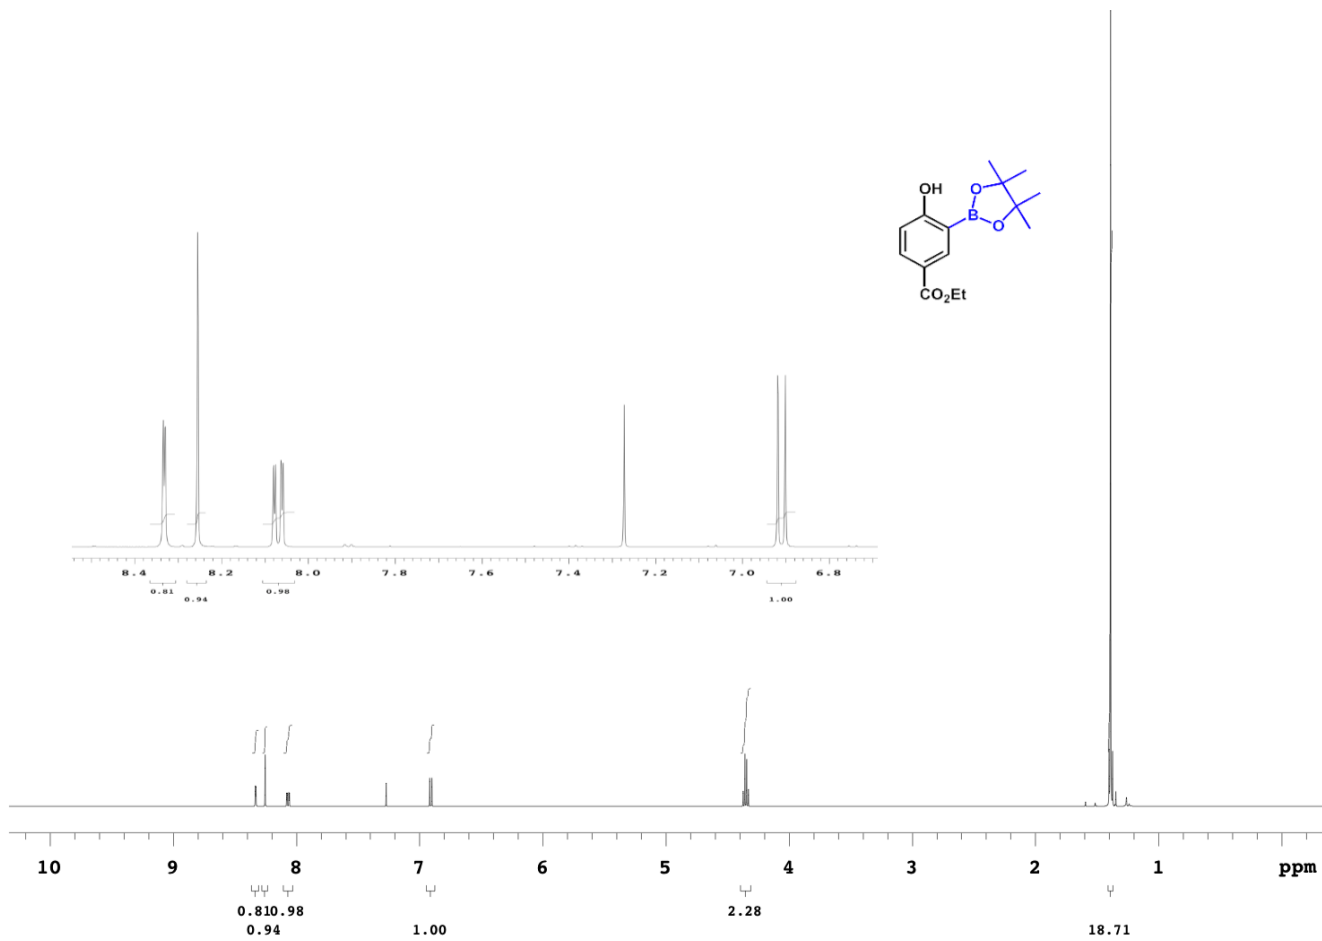

$^1\text{H-NMR}$  (500 MHz,  $\text{CDCl}_3$ )

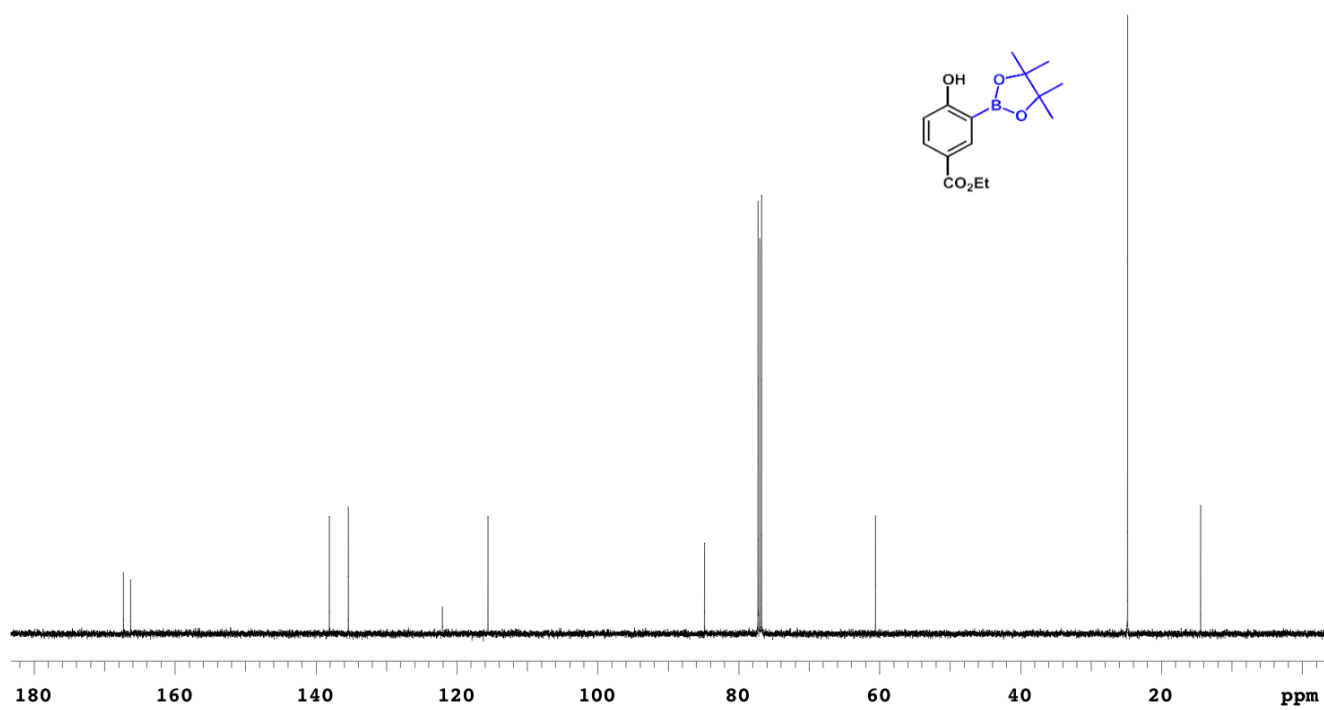

$^{13}\text{C}$ -NMR (125 MHz,  $\text{CDCl}_3$ )

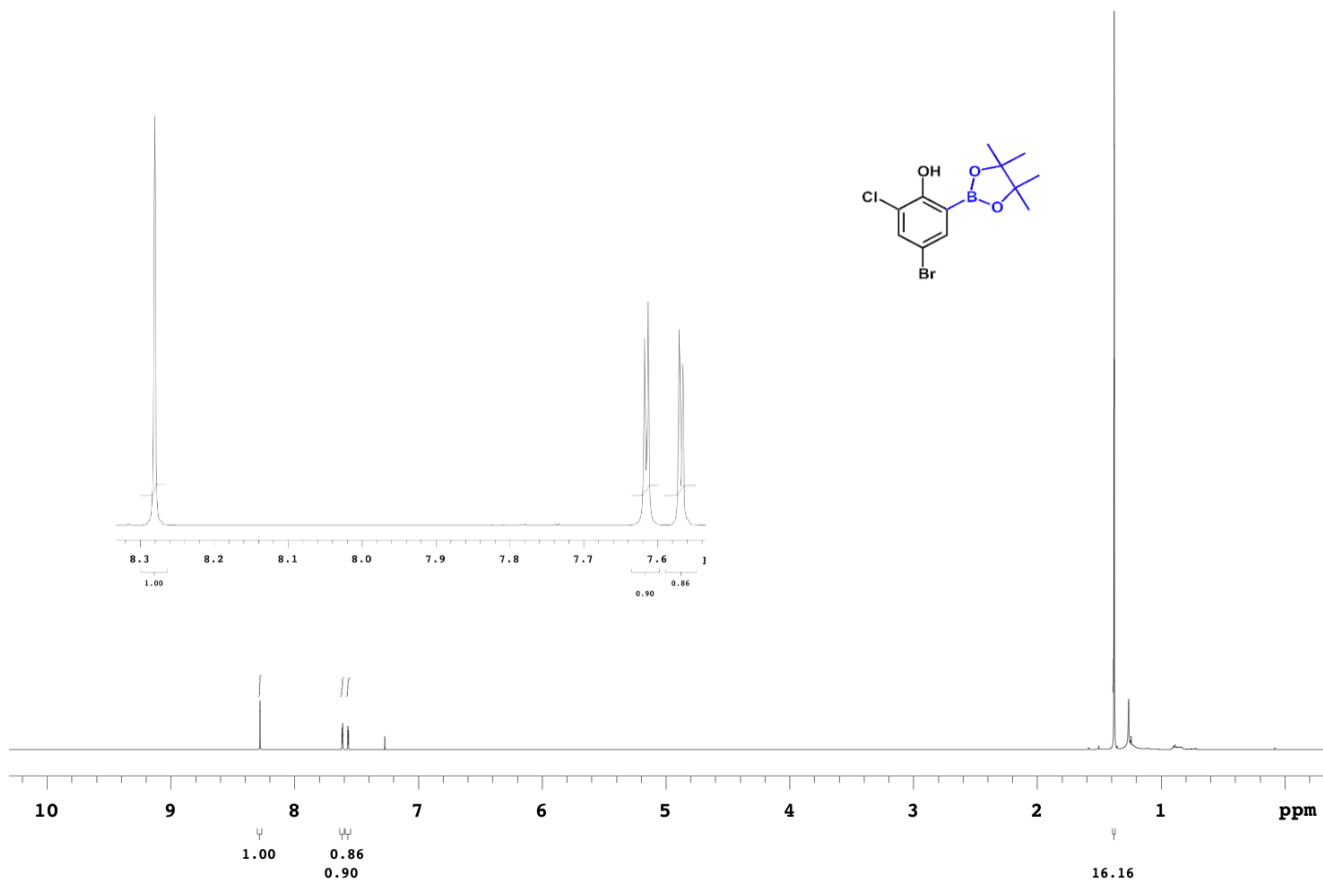

$^1\text{H-NMR}$  (500 MHz,  $\text{CDCl}_3$ )

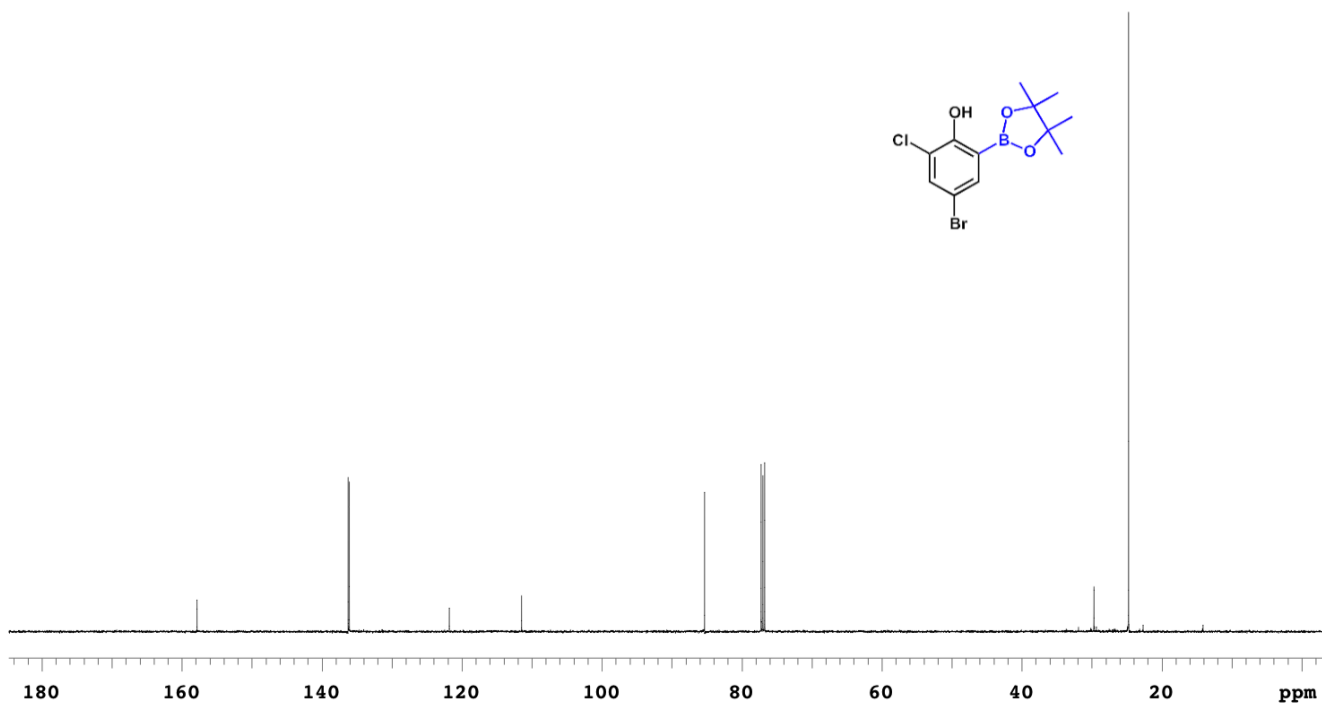

$^{13}\text{C}$ -NMR (125 MHz,  $\text{CDCl}_3$ )



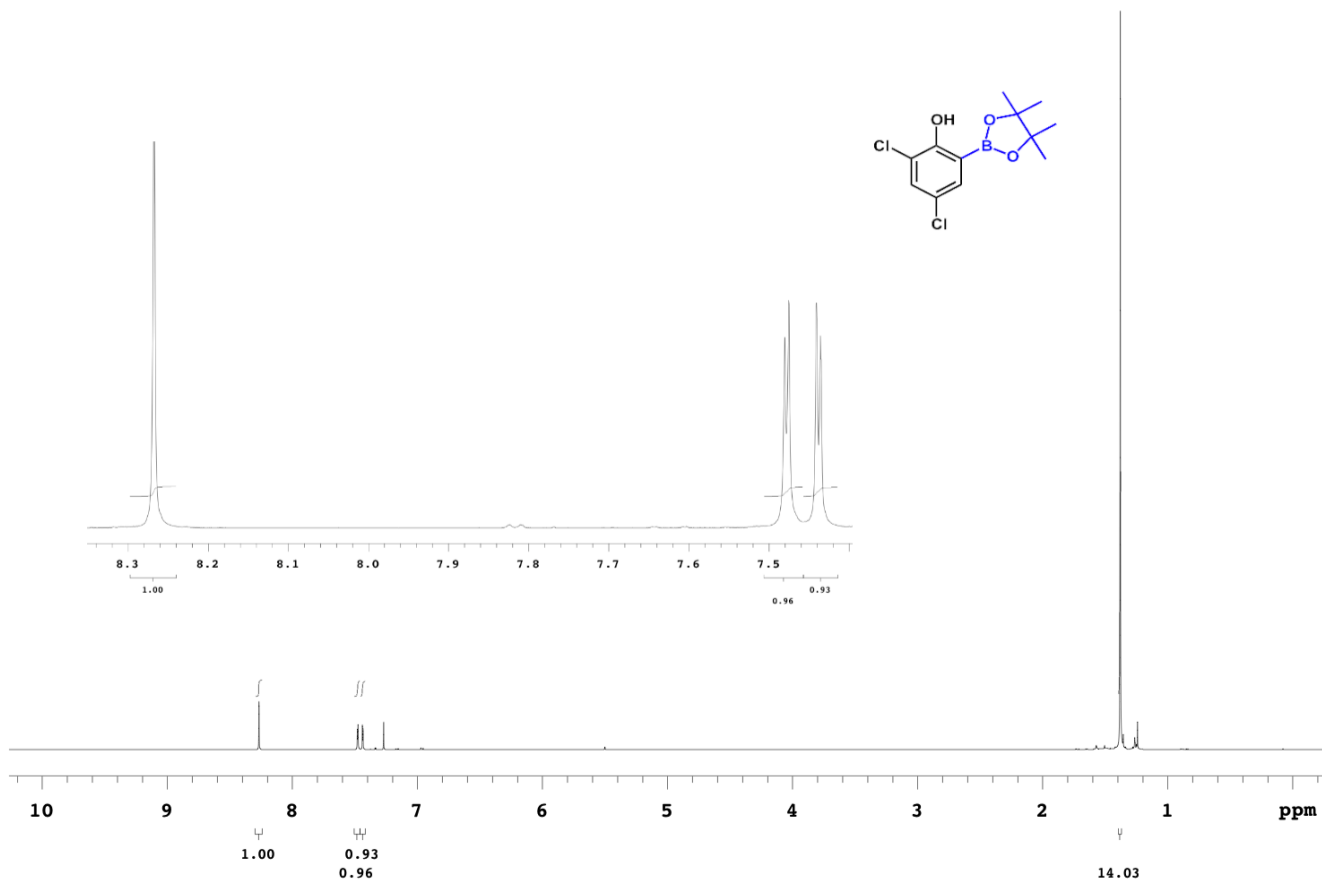

$^1\text{H-NMR}$  (500 MHz,  $\text{CDCl}_3$ )

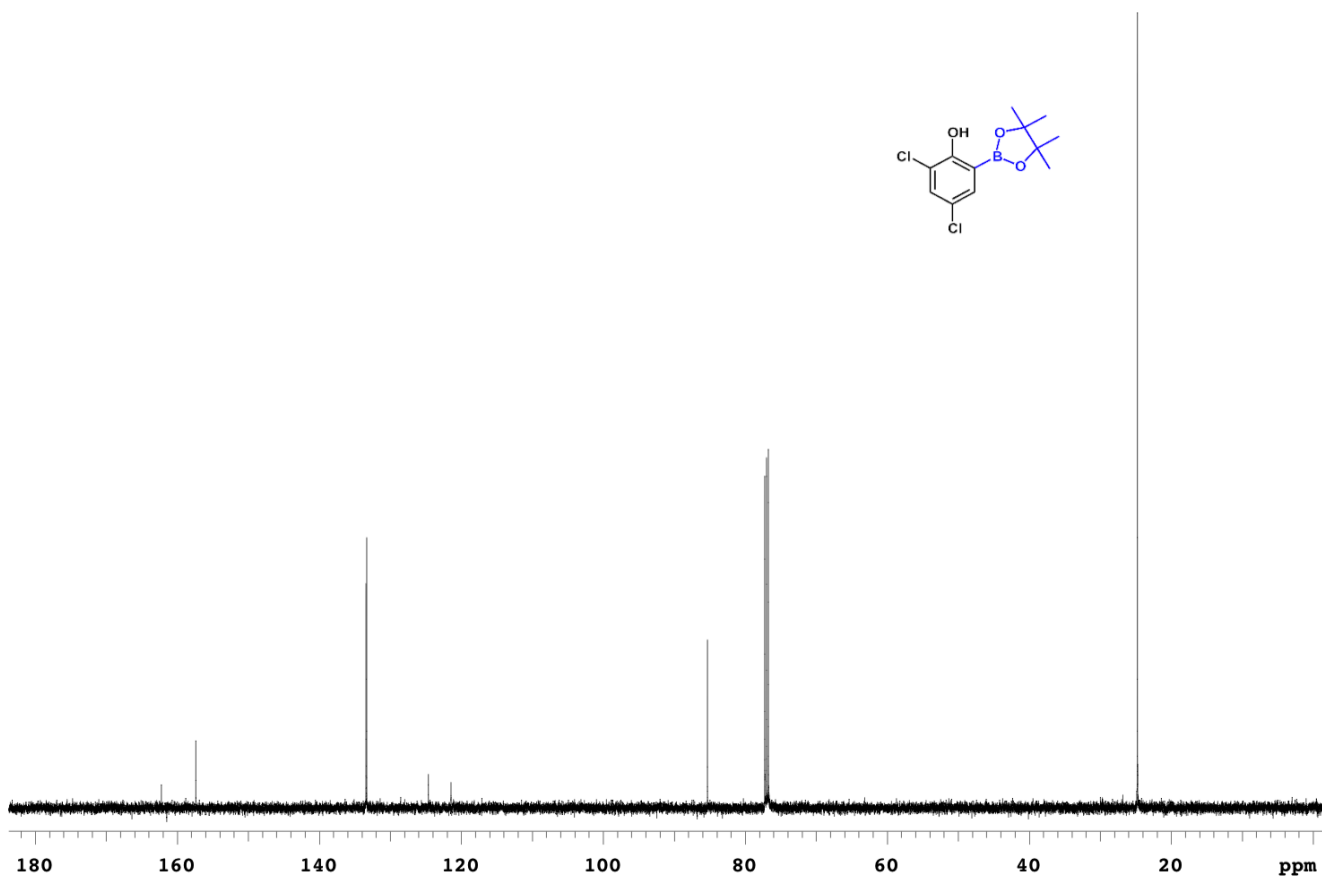

$^{13}\text{C}$ -NMR (125 MHz,  $\text{CDCl}_3$ )





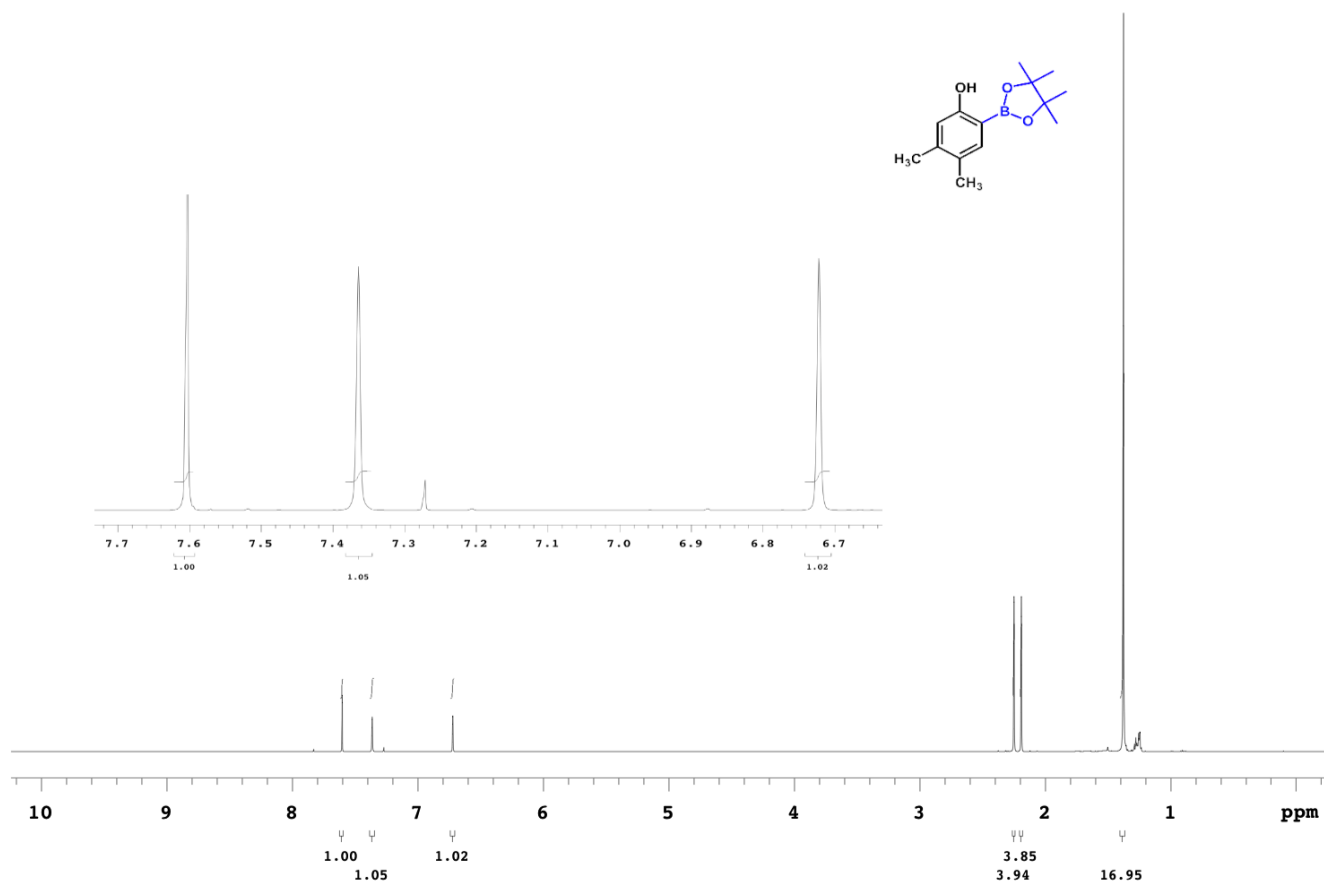

$^1\text{H-NMR}$  (500 MHz,  $\text{CDCl}_3$ )

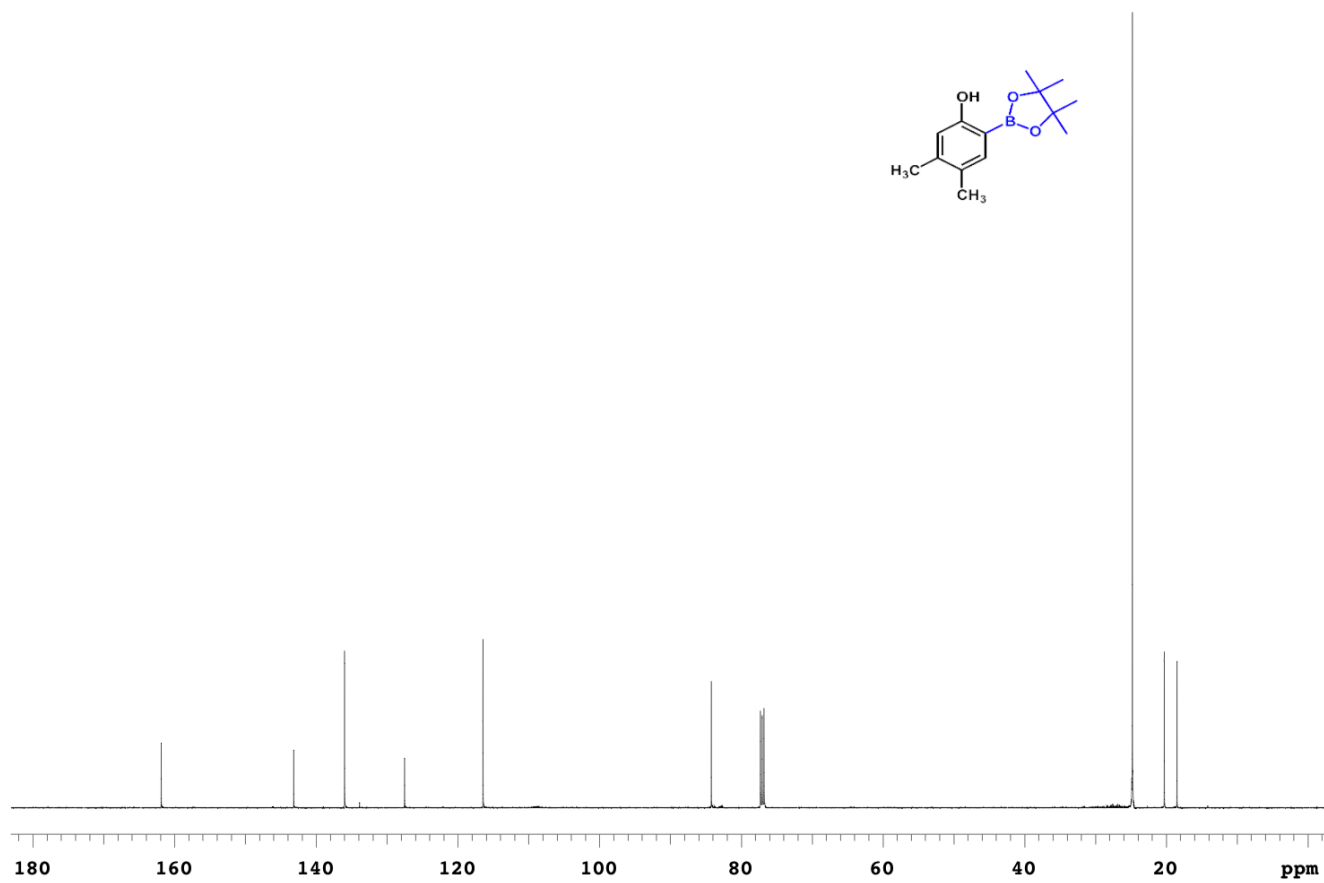

$^{13}\text{C}$ -NMR (125 MHz,  $\text{CDCl}_3$ )

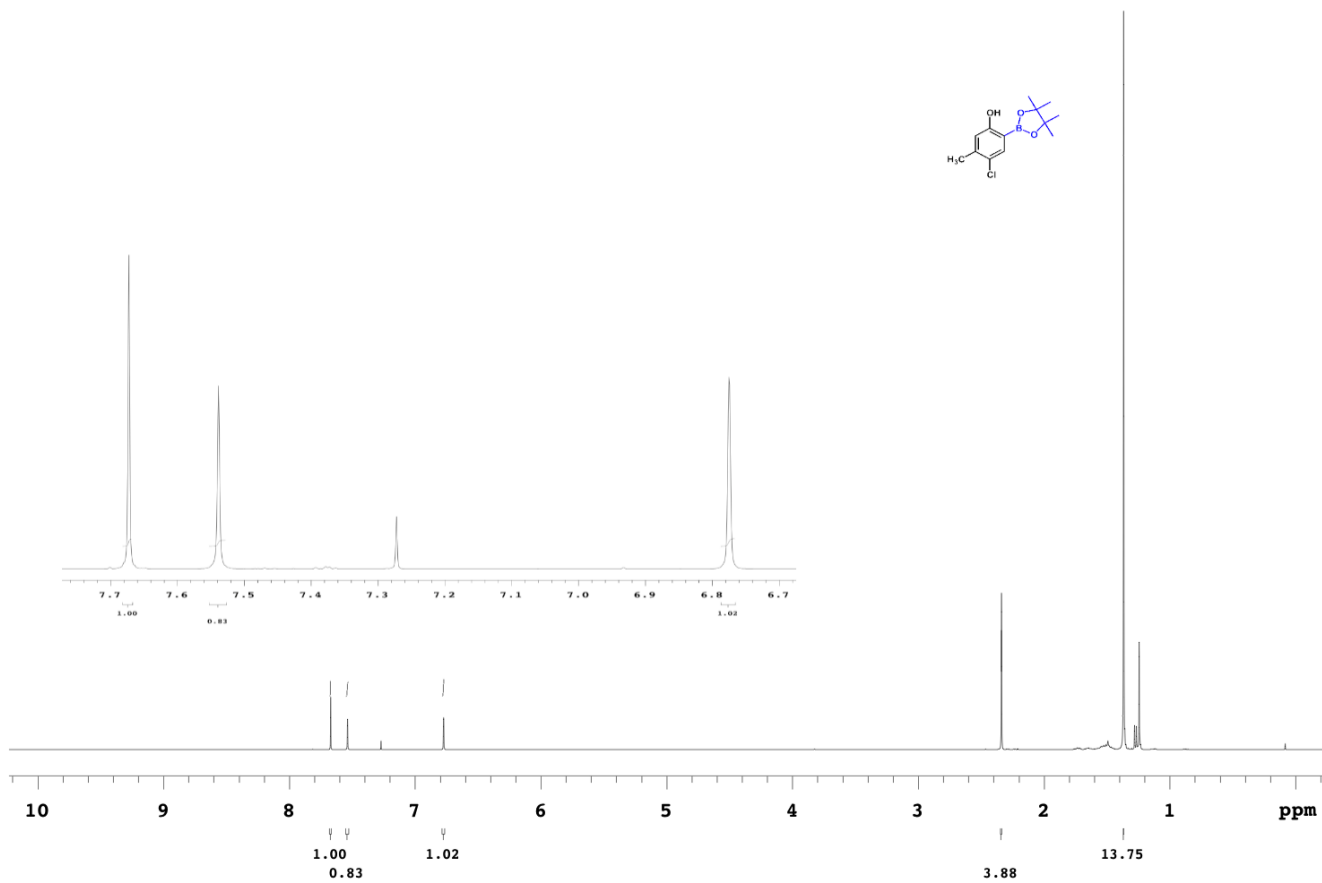

$^1\text{H-NMR}$  (500 MHz,  $\text{CDCl}_3$ )

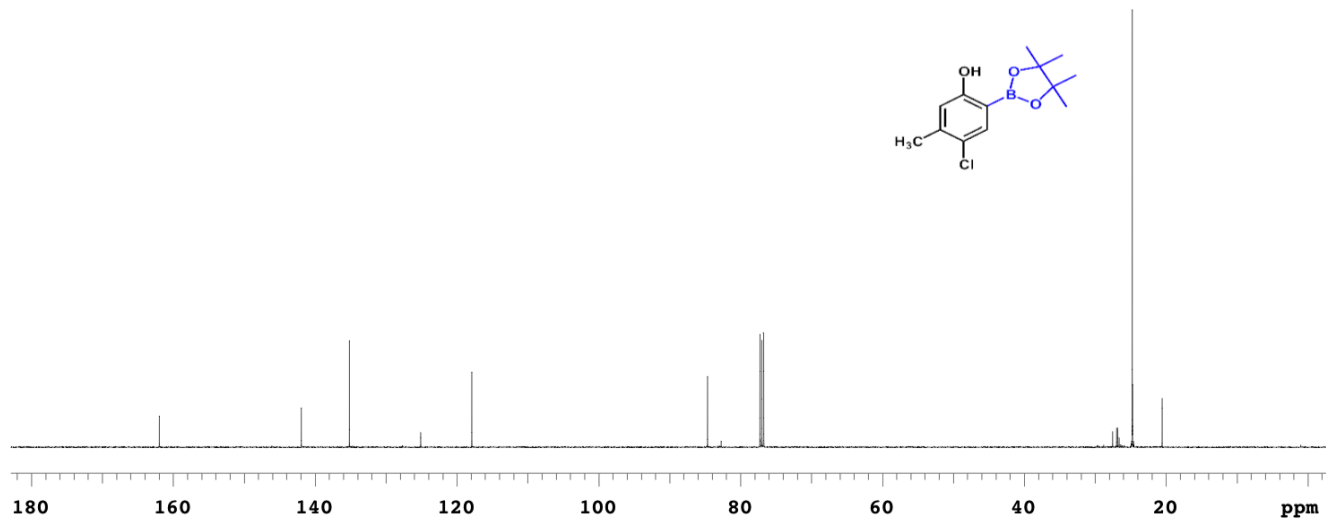

$^{13}\text{C}$ -NMR (125 MHz,  $\text{CDCl}_3$ )



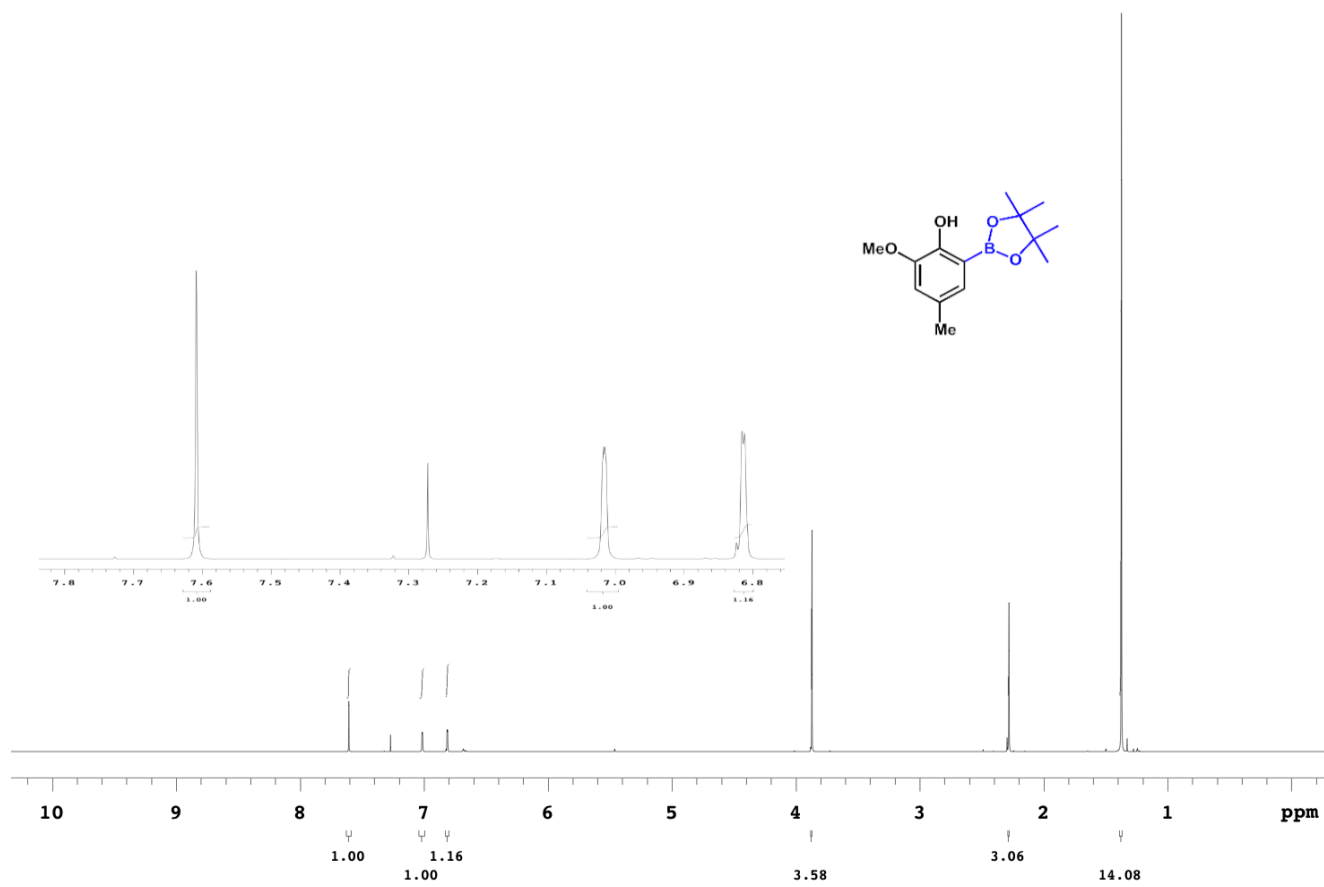 $^1\text{H-NMR}$  (500 MHz,  $\text{CDCl}_3$ )

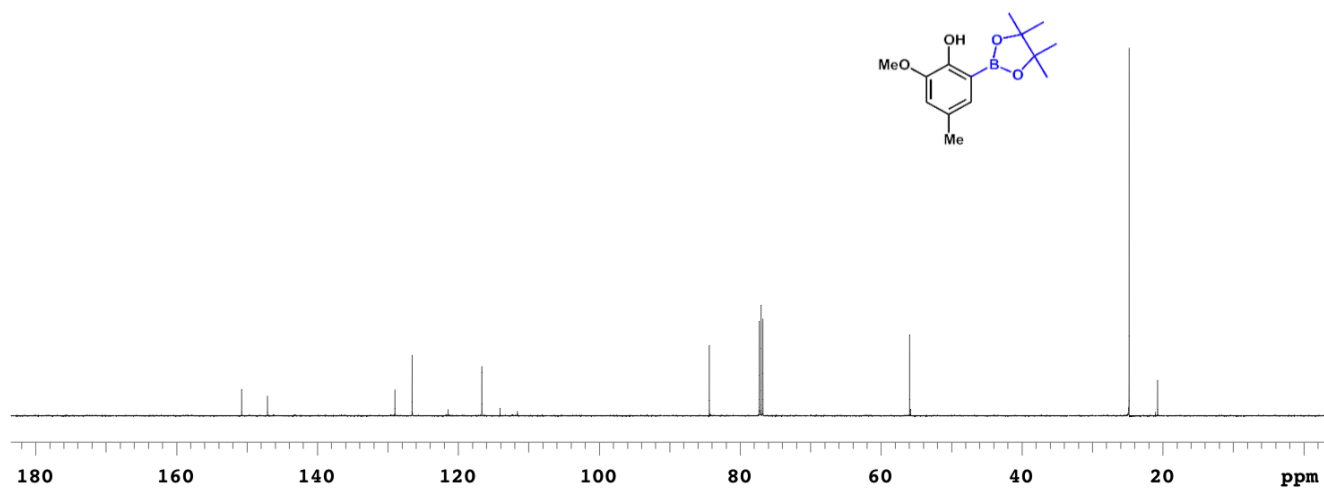

$^{13}\text{C}$ -NMR (125 MHz,  $\text{CDCl}_3$ )

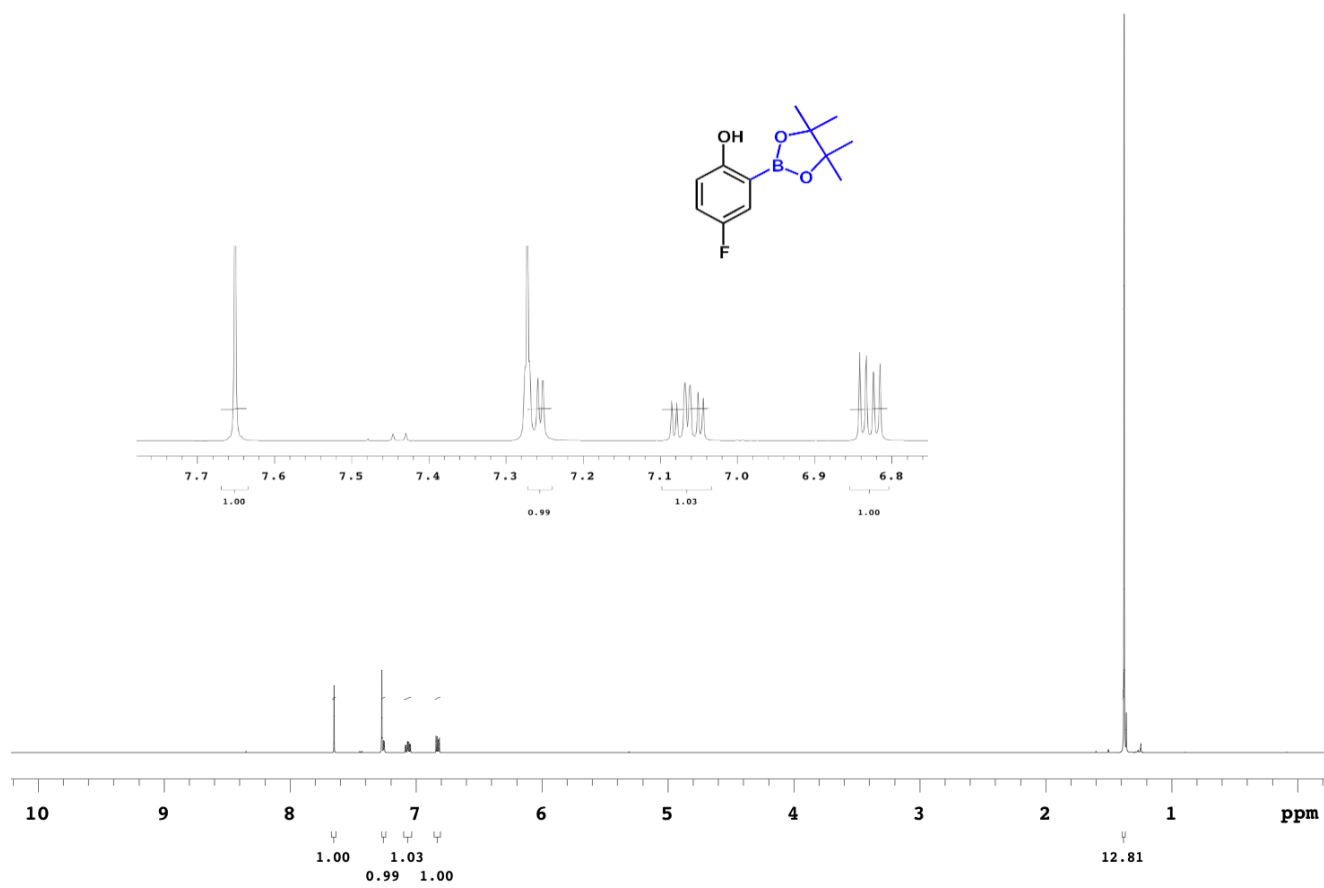



$^1\text{H-NMR}$  (500 MHz,  $\text{CDCl}_3$ )

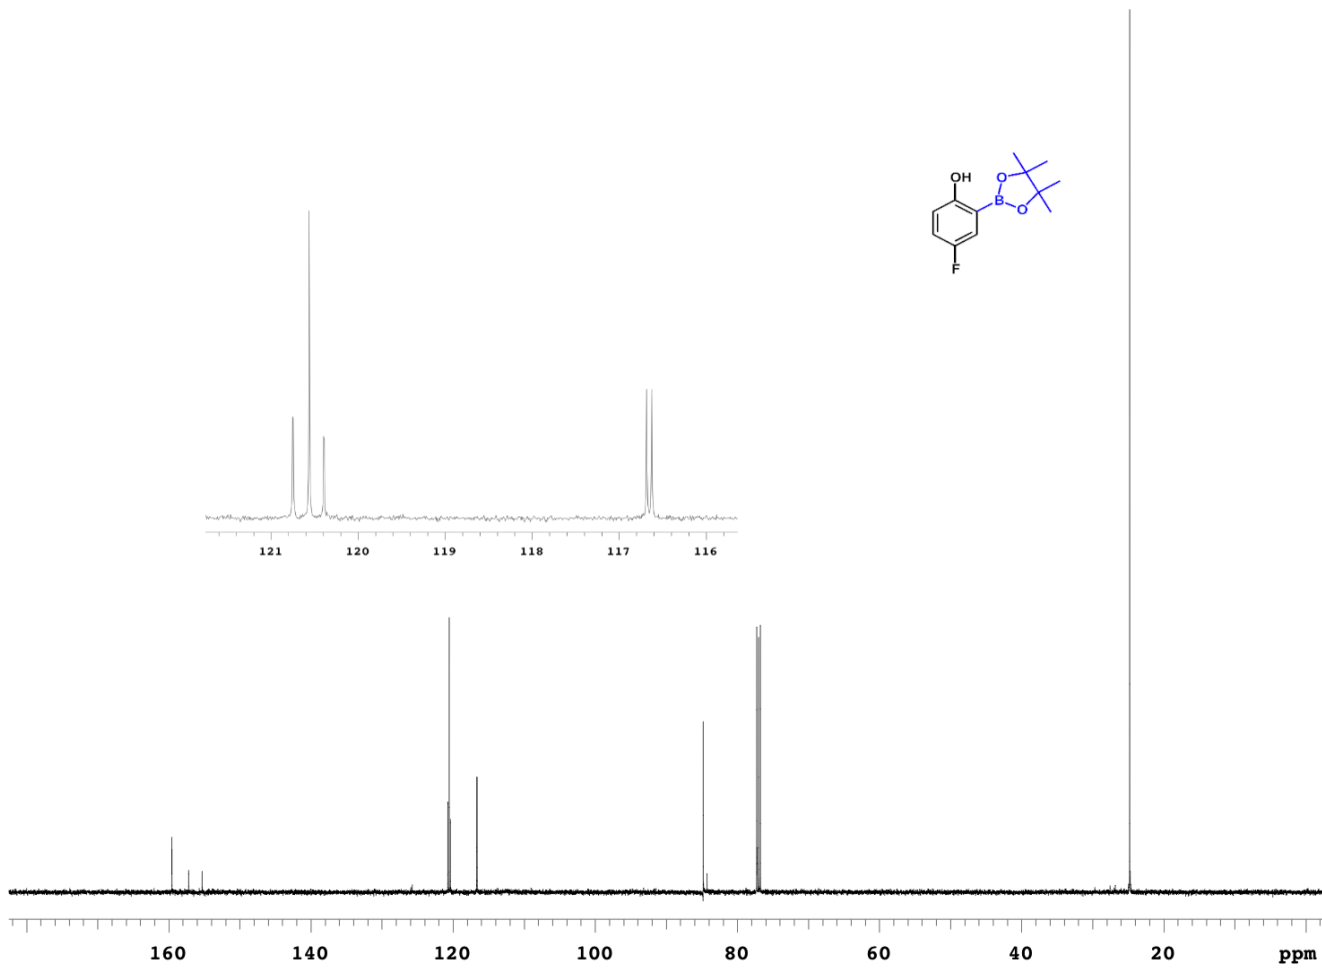

$^{13}\text{C}$ -NMR (125 MHz,  $\text{CDCl}_3$ )



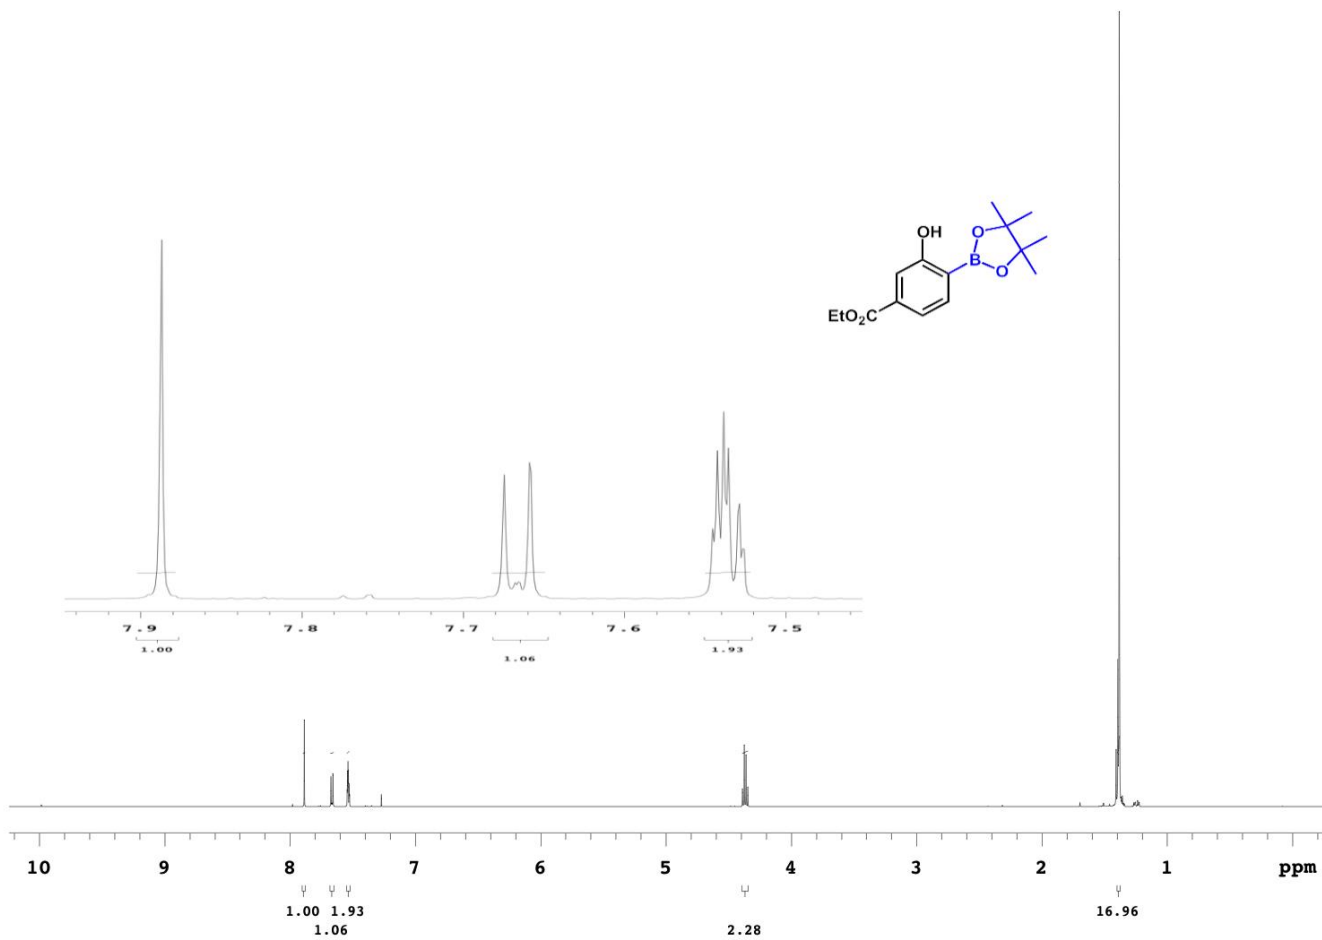

$^1\text{H-NMR}$  (500 MHz,  $\text{CDCl}_3$ )

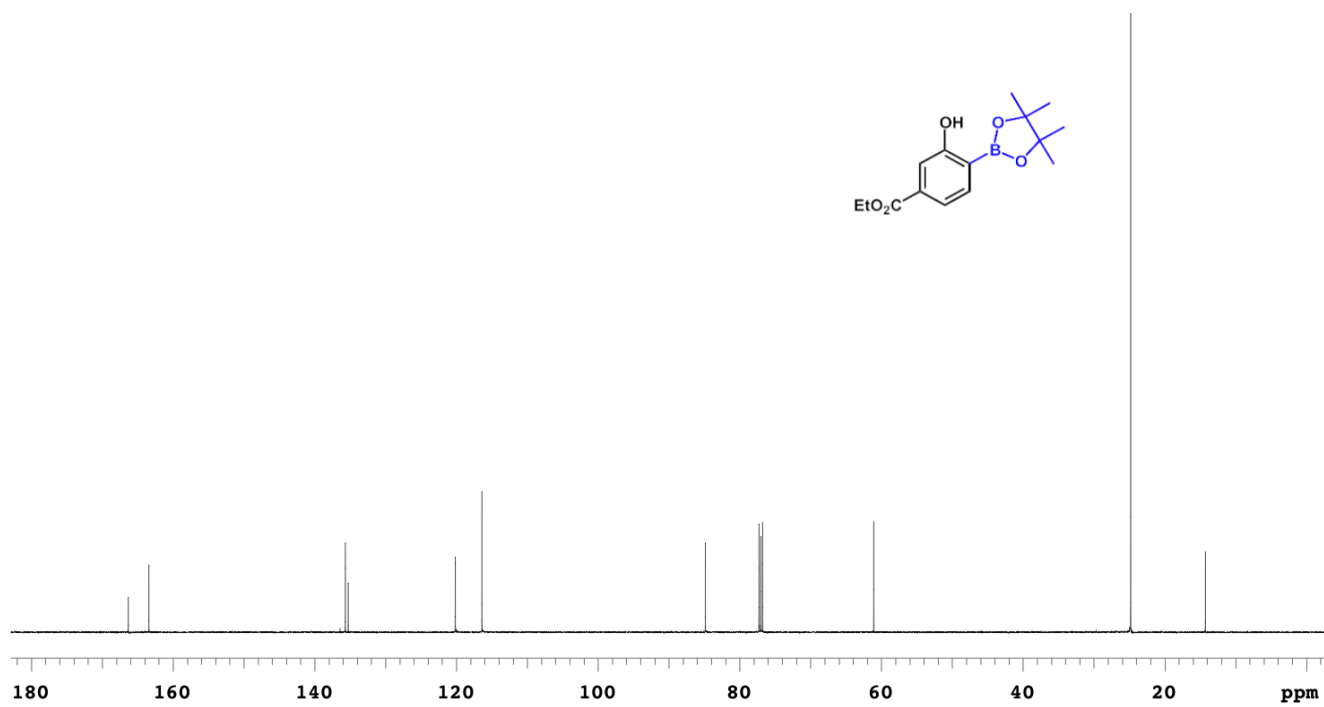

$^{13}\text{C}$ -NMR (125 MHz,  $\text{CDCl}_3$ )

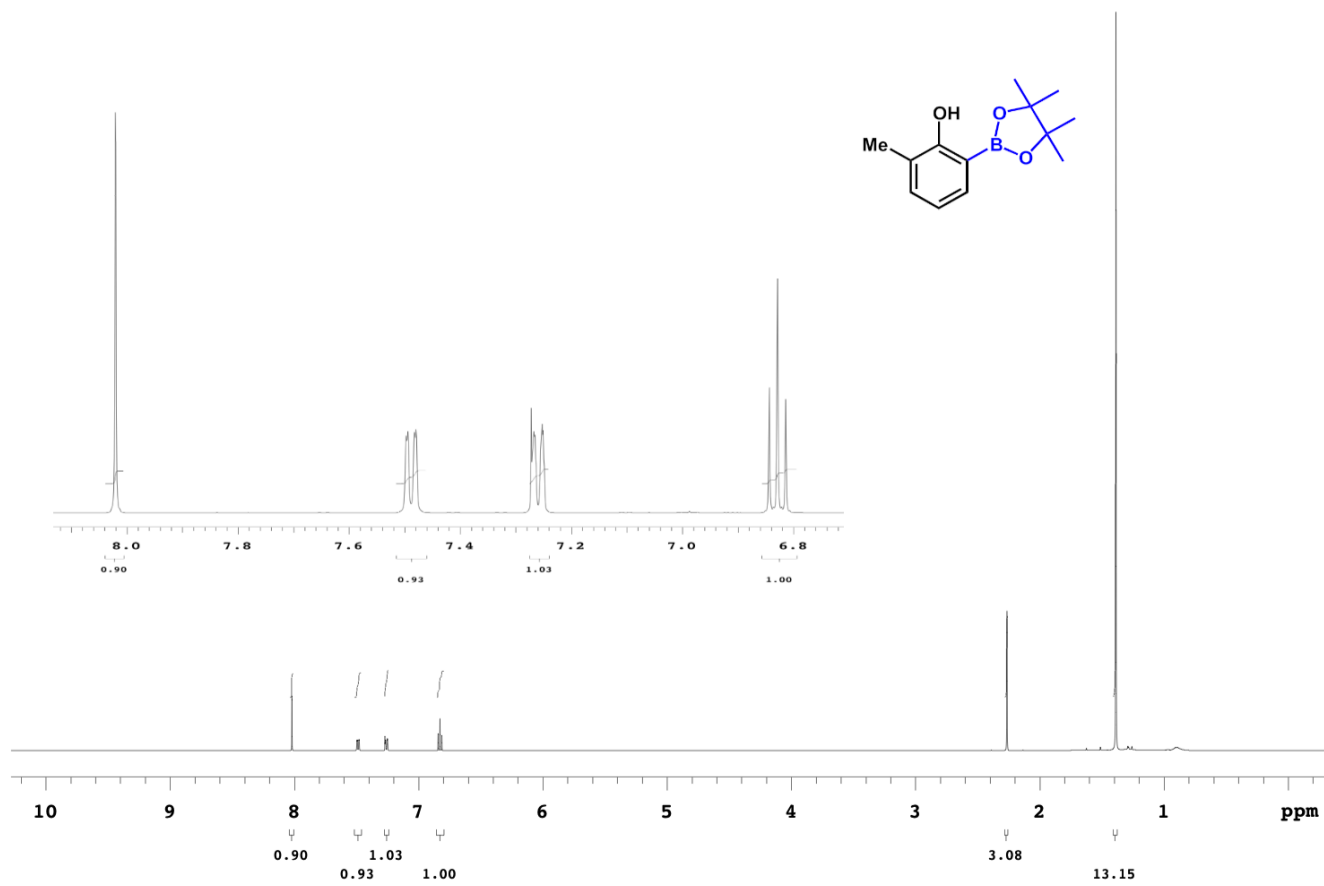

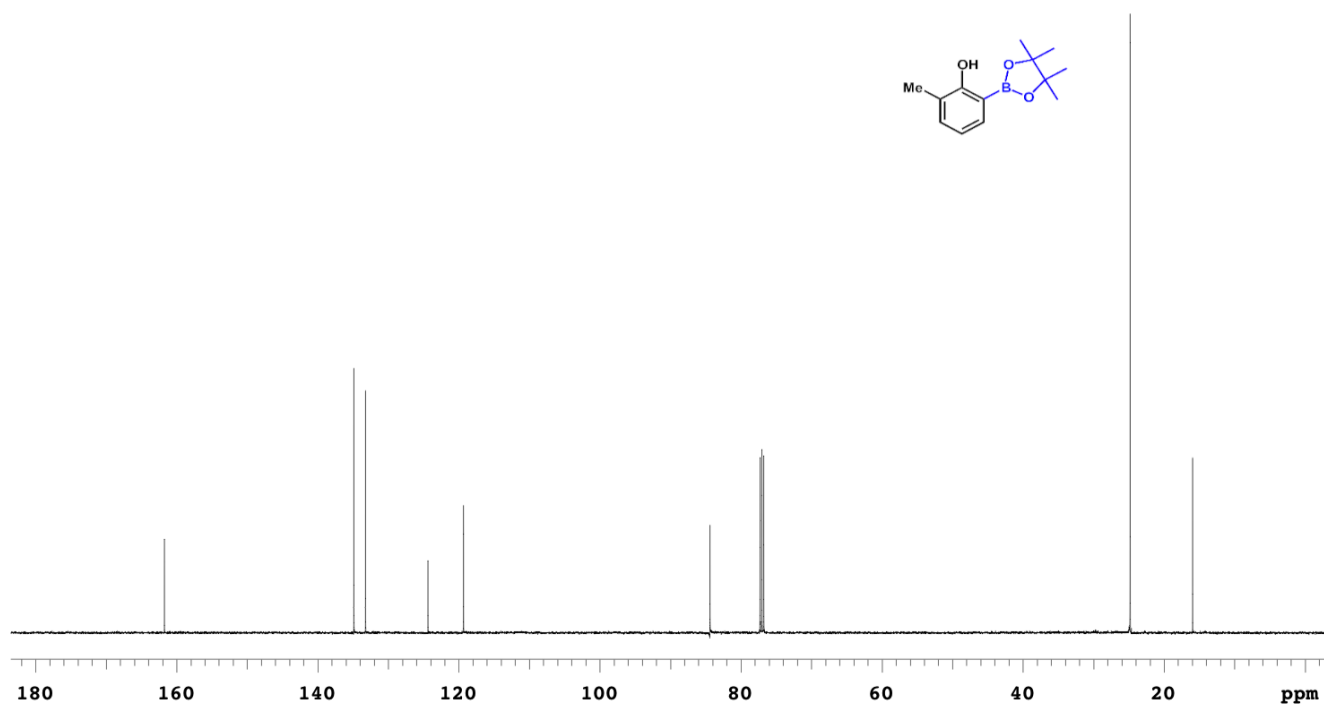

$^{13}\text{C}$ -NMR (125 MHz,  $\text{CDCl}_3$ )





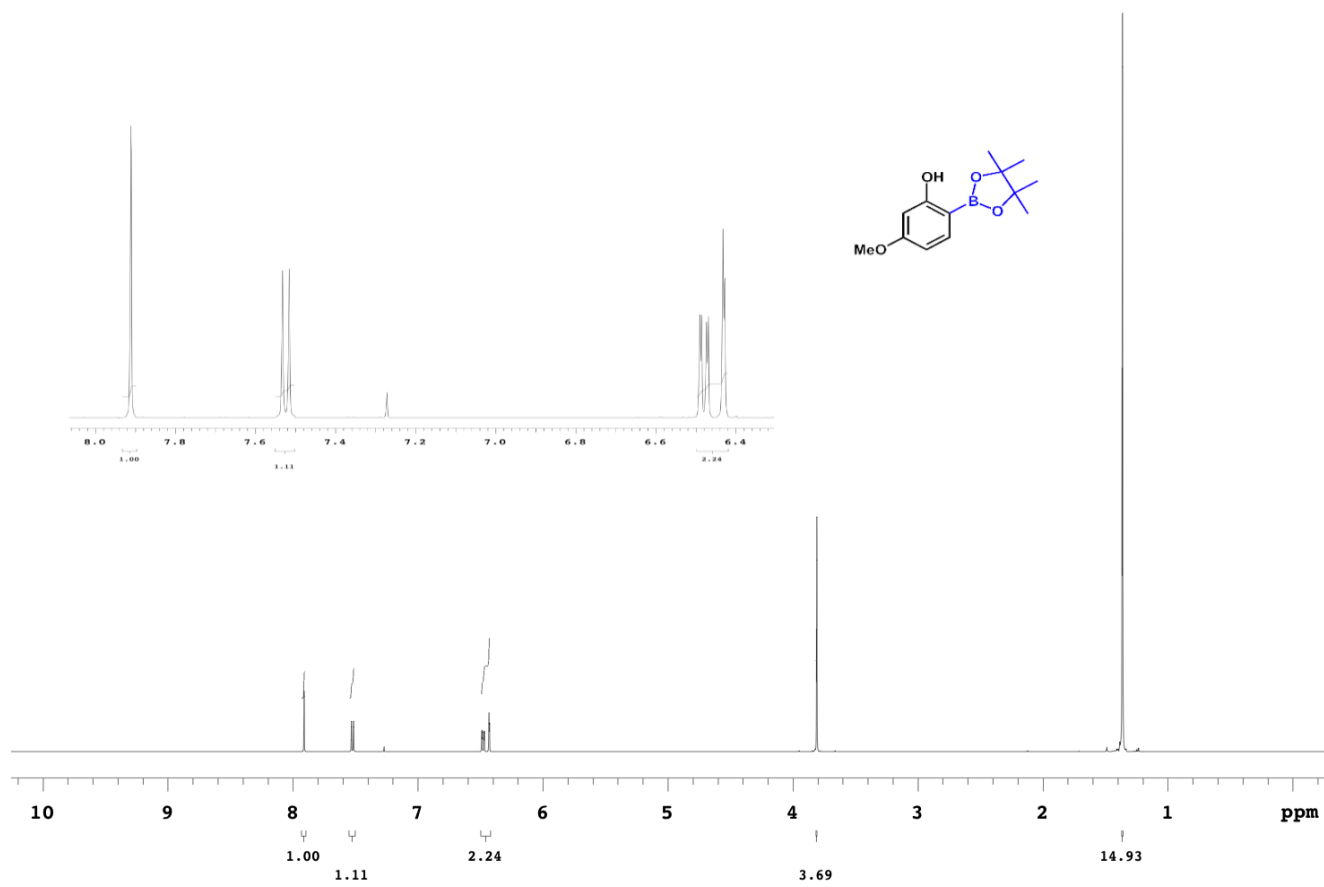

$^1\text{H-NMR}$  (500 MHz,  $\text{CDCl}_3$ )



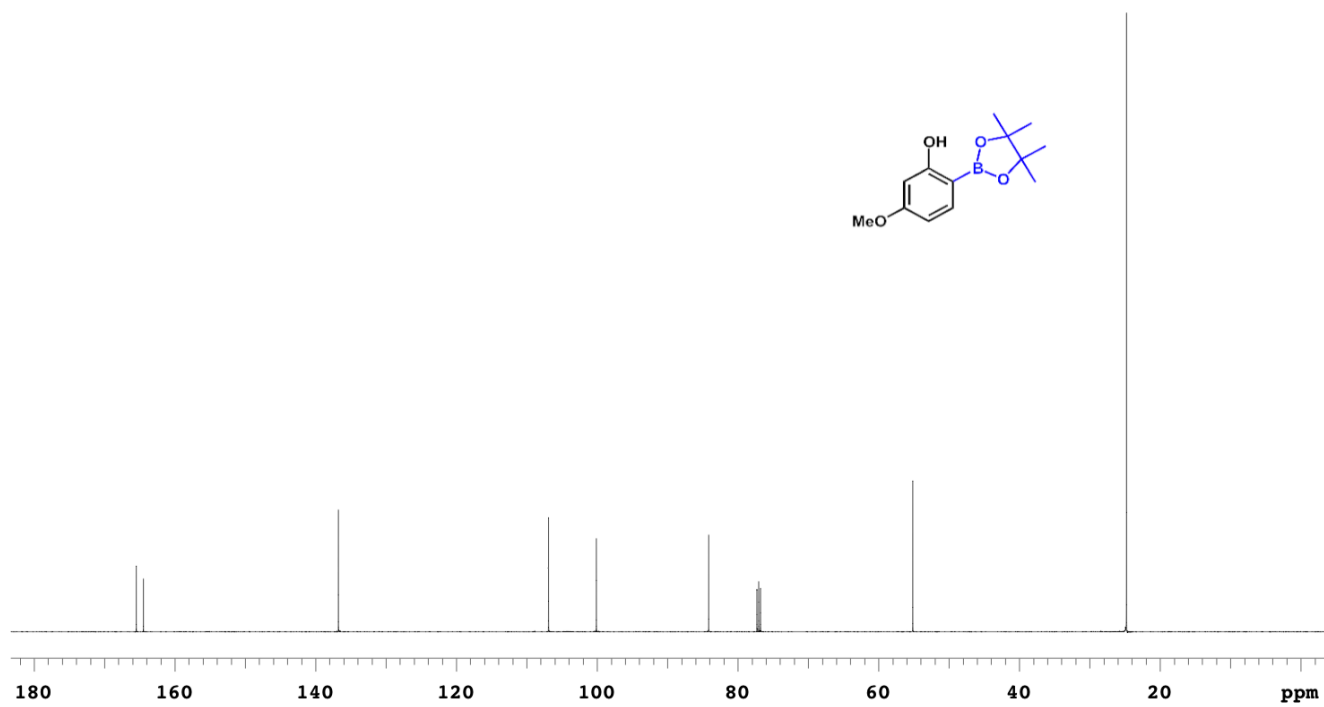

$^{13}\text{C}$ -NMR (125 MHz,  $\text{CDCl}_3$ )

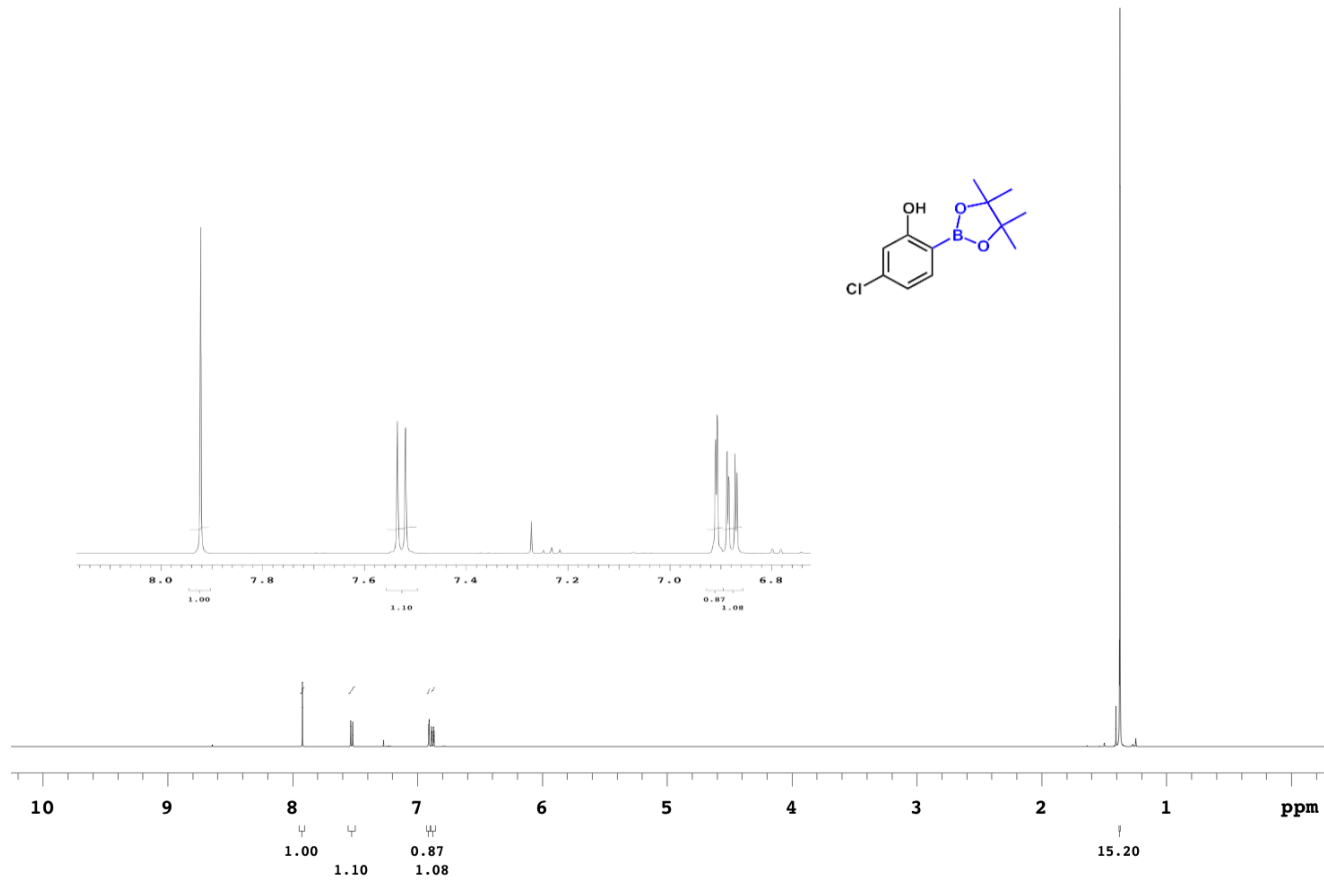

$^1\text{H-NMR}$  (500 MHz,  $\text{CDCl}_3$ )

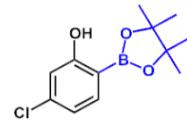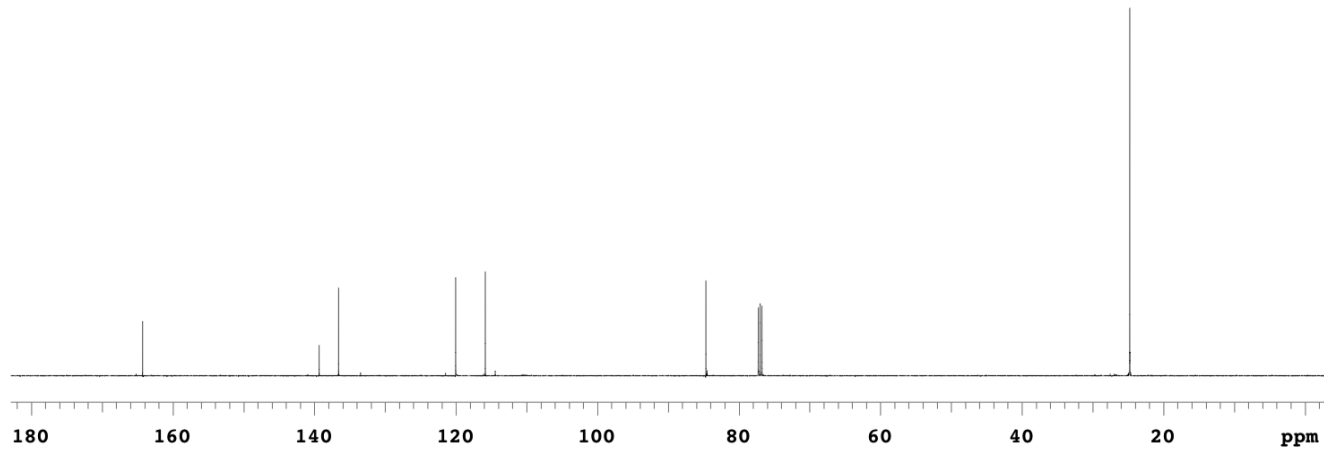

<sup>13</sup>C-NMR (125 MHz, CDCl<sub>3</sub>)



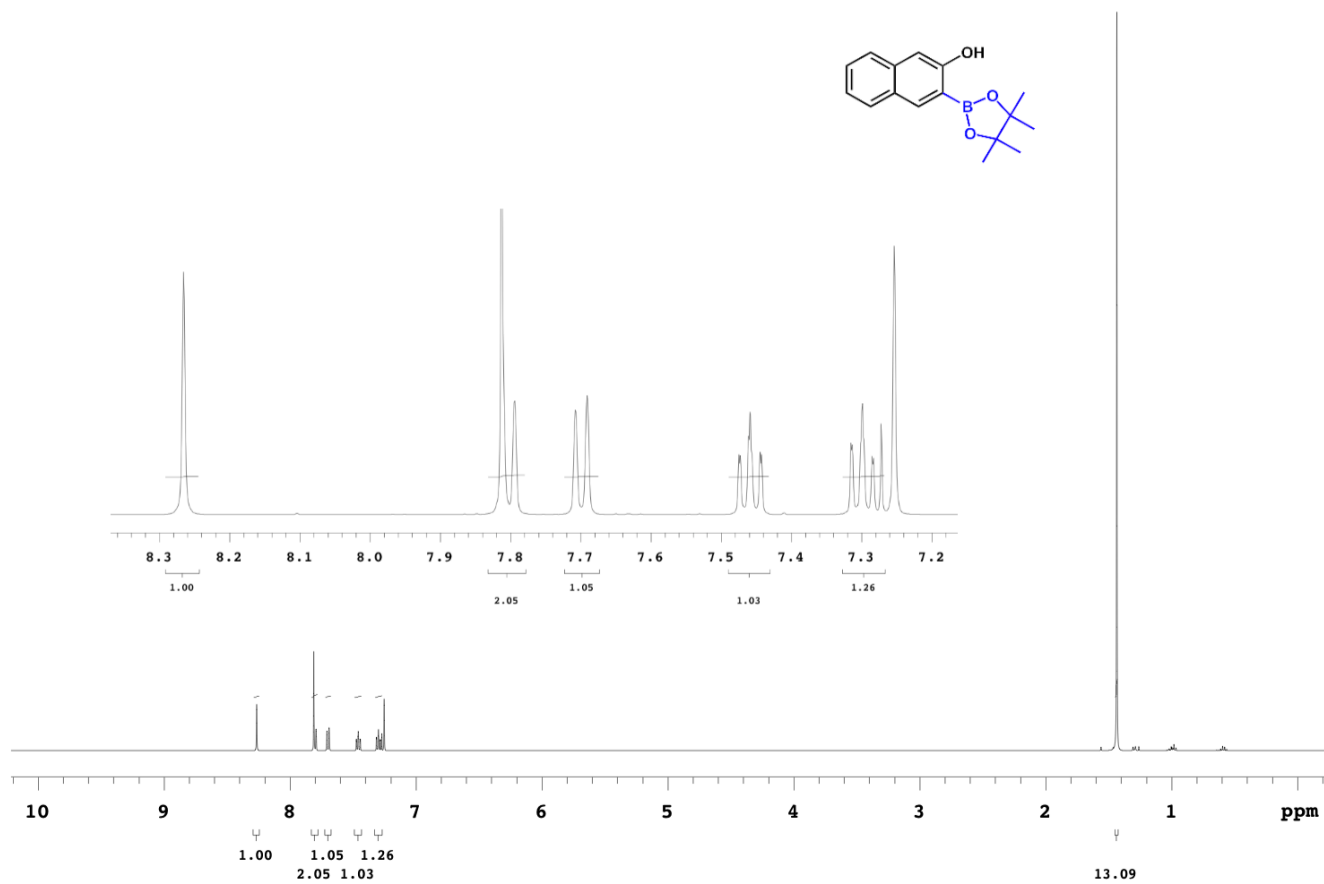

$^1\text{H-NMR}$  (500 MHz,  $\text{CDCl}_3$ )



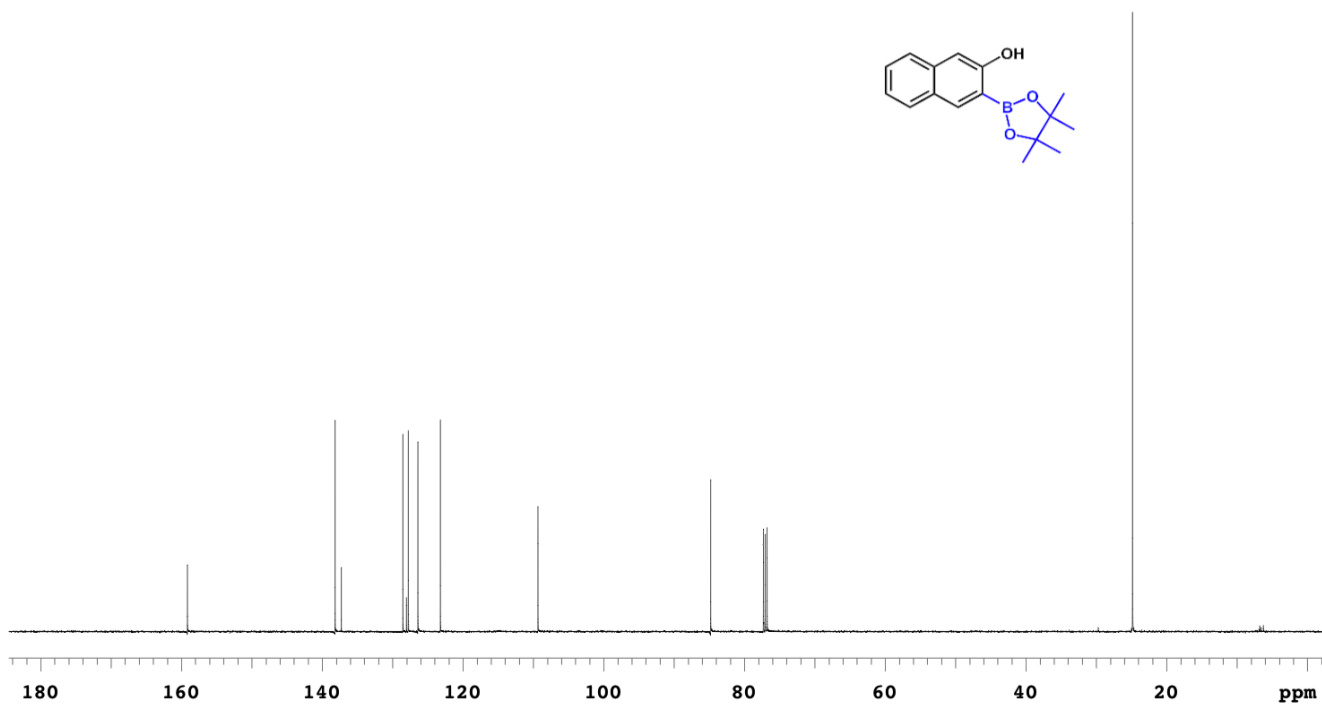

$^{13}\text{C}$ -NMR (125 MHz,  $\text{CDCl}_3$ )

## References

- 1) Uson, R.; Oro, L. A.; Cabeza, J. A. *Inorg. Synth.* **1985**, *23*, 126-130.
- 2) Ms. Yu-Ling Lien and the MSU Mass Spectrometry facility are thanked for obtaining ESI+ HRMS.
- 3) Ishiyama, T.; Takagi, J.; Ishida, K.; Miyaura, N.; Anastasi, N. R.; Hartwig, J. F. *J. Am. Chem. Soc.* **2002**, *124*, 390-391.
- 4) Cheng, C.; Hartwig, J. F. *Science* **2014**, *343*, 853-857.
- 5) Friedman, A. A.; Panteleev, J.; Tsoung, J.; Huynh, V.; Lautens, M. *Angew. Chem. Int. Ed.* **2013**, *52*, 9755–9758.
- 6) Huang, W.; Su, L.; Bo, Z. *J. Am. Chem. Soc.* **2009**, *82*, 870-878.
- 7) Welch, C. N.; Shore, S. G. *Inorg. Chem.* **1968**, *7*, 225-230.
- 8) Sumida, Y.; Kato, T.; Hosoya, T. *Org. Lett.* **2013**, *15*, 2806–2809.
- 9) a) Pineschi, M.; Bertolini, F.; Haak, R. M.; Crotti, P.; Macchia, F. *Chem. Commun.*, **2005**, 1426-1428. b) Laurent, J-P.; *Comptes Rendus Hebdomadaires des Seances de l'Academi des Sciences*, **1962**, *254*, 866-868.
- 10) Blau, J. A.; Gerrard, W.; Lappert, M. F.; *J. Chem. Soc.* **1957**, 4116-4119.
- 11) Gaussian 09, Revision A.02, Frisch, M. J.; Trucks, G. W.; Schlegel, H. B.; Scuseria, G. E.; Robb, M. A.; Cheeseman, J. R.; Scalmani, G.; Barone, V.; Mennucci, B.; Petersson, G. A.; Nakatsuji, H.; Caricato, M.; Li, X.; Hratchian, H. P.; Izmaylov, A. F.; Bloino, J.; Zheng, G.; Sonnenberg, J. L.; Hada, M.; Ehara, M.; Toyota, K.; Fukuda, R.; Hasegawa, J.; Ishida, M.; Nakajima, T.; Honda, Y.; Kitao, O.; Nakai, H.; Vreven, T.; Montgomery, Jr., J. A.; Peralta, J. E.; Ogliaro, F.; Bearpark, M.; Heyd, J. J.; Brothers, E.; Kudin, K. N.; Staroverov, V. N.; Kobayashi, R.; Normand, J.; Raghavachari, K.; Rendell, A.; Burant, J. C.; Iyengar, S. S.; Tomasi, J.; Cossi, M.; Rega, N.; Millam, N. J.; Klene, M.; Knox, J. E.; Cross, J. B.; Bakken, V.; Adamo, C.; Jaramillo, J.; Gomperts, R.; Stratmann, R. E.; Yazyev, O.; Austin, A. J.; Cammi, R.; Pomelli, C.; Ochterski, J. W.; Martin, R. L.; Morokuma, K.; Zakrzewski, V. G.; Voth, G. A.; Salvador, P.; Dannenberg, J. J.; Dapprich, S.; Daniels, A. D.; Farkas, Ö.; Foresman, J. B.; Ortiz, J. V.; Cioslowski, J.; Fox, D. J. Gaussian, Inc., Wallingford CT, 2009.
- 12) Gaussian 09, Revision B.01, Frisch, M. J.; Trucks, G. W.; Schlegel, H. B.; Scuseria, G. E.; Robb, M. A.; Cheeseman, J. R.; Scalmani, G.; Barone, V.; Mennucci, B.; Petersson, G. A.; Nakatsuji, H.; Caricato, M.; Li, X.; Hratchian, H. P.; Izmaylov, A. F.; Bloino, J.; Zheng, G.; Sonnenberg, J. L.; Hada, M.; Ehara, M.; Toyota, K.; Fukuda, R.; Hasegawa, J.; Ishida, M.; Nakajima, T.; Honda, Y.; Kitao, O.; Nakai, H.; Vreven, T.; Montgomery, Jr., J. A.; Peralta, J. E.; Ogliaro, F.; Bearpark, M.; Heyd, J. J.; Brothers, E.; Kudin, K. N.; Staroverov, V. N.; Kobayashi, R.; Normand, J.; Raghavachari, K.; Rendell, A.; Burant, J. C.; Iyengar, S. S.; Tomasi, J.; Cossi, M.; Rega, N.; Millam, N. J.; Klene, M.; Knox, J. E.; Cross, J. B.; Bakken, V.; Adamo, C.; Jaramillo, J.; Gomperts, R.; Stratmann, R. E.; Yazyev, O.; Austin, A. J.; Cammi, R.; Pomelli, C.; Ochterski, J. W.; Martin, R. L.; Morokuma, K.; Zakrzewski, V. G.; Voth, G. A.; Salvador, P.; Dannenberg, J. J.; Dapprich, S.; Daniels, A. D.; Farkas, Ö.; Foresman, J. B.; Ortiz, J. V.; Cioslowski, J.; Fox, D. J. Gaussian, Inc., Wallingford CT, 2009.
- 13) Gaussian 09, Revision D.01, Frisch, M. J.; Trucks, G. W.; Schlegel, H. B.; Scuseria, G. E.; Robb, M. A.; Cheeseman, J. R.; Scalmani, G.; Barone, V.; Mennucci, B.; Petersson, G. A.; Nakatsuji, H.; Caricato, M.; Li, X.; Hratchian, H. P.; Izmaylov, A. F.; Bloino, J.; Zheng, G.; Sonnenberg, J. L.; Hada, M.; Ehara, M.; Toyota, K.; Fukuda, R.; Hasegawa, J.; Ishida, M.;

---

Nakajima, T.; Honda, Y.; Kitao, O.; Nakai, H.; Vreven, T.; Montgomery, J. A., Jr.; Peralta, J. E.; Ogliaro, F.; Bearpark, M.; Heyd, J. J.; Brothers, E.; Kudin, K. N.; Staroverov, V. N.; Kobayashi, R.; Normand, J.; Raghavachari, K.; Rendell, A.; Burant, J. C.; Iyengar, S. S.; Tomasi, J.; Cossi, M.; Rega, N.; Millam, N. J.; Klene, M.; Knox, J. E.; Cross, J. B.; Bakken, V.; Adamo, C.; Jaramillo, J.; Gomperts, R.; Stratmann, R. E.; Yazyev, O.; Austin, A. J.; Cammi, R.; Pomelli, C.; Ochterski, J. W.; Martin, R. L.; Morokuma, K.; Zakrzewski, V. G.; Voth, G. A.; Salvador, P.; Dannenberg, J. J.; Dapprich, S.; Daniels, A. D.; Farkas, Ö.; Foresman, J. B.; Ortiz, J. V.; Cioslowski, J.; Fox, D. J. Gaussian, Inc., Wallingford CT, 2009.

14) NBO 5.9. E. D. Glendening, J. K. Badenhoop, A. E. Reed, J. E. Carpenter, J. A. Bohmann, C. M. Morales, and F. Weinhold (Theoretical Chemistry Institute, University of Wisconsin, Madison, WI, 2011); <http://www.chem.wisc.edu/~nbo5>
